# Supplementary material for: Reliability and Discriminative Validity of Wearable Sensors for the Quantification of Upper Limb Movement Disorders in Individuals with Dyskinetic Cerebral Palsy
Source: MDPI journal article supplement (doi:10.3390/s23031574), 2023-02-01
Supplement: s1 [file s1]

|                                    | Hand    |                 | Forearm |                 | Upper arm |                 |
|------------------------------------|---------|-----------------|---------|-----------------|-----------|-----------------|
|                                    | SEM     | MEAN DIFFERENCE | SEM     | MEAN DIFFERENCE | SEM       | MEAN DIFFERENCE |
| <b>REACH FORWARD</b>               |         |                 |         |                 |           |                 |
| Max Jerk (m/s <sup>3</sup> )       | 50.62   | 355.82          | 47.36   | 288.59          | 21.45     | 79.97           |
| Max Ang Jerk (rad/s <sup>2</sup> ) | 7849.15 | 1968.83         | 5331.42 | 1740.59         | 3190.64   | 1009.18         |
| Mean Acc (m/s <sup>2</sup> )       | 0.71    | 0.06            | 0.53    | 0.17            | 0.29      | 0.27            |
| Max Acc (m/s <sup>2</sup> )        | 2.36    | 15.58           | 1.69    | 13.10           | 0.65      | 4.87            |
| Mean Gyr (rad/s)                   | 0.40    | 0.19            | 0.30    | 0.20            | 0.29      | 0.06            |
| Max Gyr (rad/s)                    | 1.14    | 3.18            | 0.82    | 2.59            | 0.35      | 1.02            |
| RMS Gyr (rad/s)                    | 0.35    | 0.31            | 0.26    | 0.25            | 0.26      | 0.01            |
| RMS Acc ( m/s <sup>2</sup> )       | 0.59    | 0.70            | 0.50    | 0.69            | 0.27      | 0.45            |
| SE Acc                             | 0.17    | 0.05            | 0.17    | 0.03            | 0.21      | 0.04            |
| SE Gyr                             | 0.17    | 0.03            | 0.16    | 0.01            | 0.12      | 0.05            |
| <b>REACH &amp; GRASP VERTICAL</b>  |         |                 |         |                 |           |                 |
| Max Jerk (m/s <sup>3</sup> )       | 50.62   | 355.82          | 47.36   | 288.59          | 15.31     | 97.67           |
| Max Ang Jerk (rad/s <sup>2</sup> ) | 7849.15 | 1968.83         | 5331.42 | 1740.59         | 2445.10   | 1478.28         |
| Mean Acc (m/s <sup>2</sup> )       | 0.71    | 0.06            | 0.53    | 0.17            | 0.20      | 0.25            |
| Max Acc (m/s <sup>2</sup> )        | 2.36    | 15.58           | 1.69    | 13.10           | 0.51      | 5.78            |
| Mean Gyr (rad/s)                   | 0.40    | 0.19            | 0.30    | 0.20            | 0.23      | 0.03            |
| Max Gyr (rad/s)                    | 1.14    | 3.18            | 0.82    | 2.59            | 0.25      | 1.87            |
| RMS Gyr (rad/s)                    | 0.35    | 0.31            | 0.26    | 0.25            | 0.20      | 0.03            |
| RMS Acc ( m/s <sup>2</sup> )       | 0.59    | 0.70            | 0.50    | 0.69            | 0.18      | 0.43            |
| SE Acc                             | 0.17    | 0.05            | 0.17    | 0.03            | 0.19      | 0.07            |
| SE Gyr                             | 0.17    | 0.03            | 0.16    | 0.01            | 0.10      | 0.02            |
| <b>REACH SIDEWAYS</b>              |         |                 |         |                 |           |                 |
| Max Jerk (m/s <sup>3</sup> )       | 59.18   | 332.91          | 51.84   | 301.28          | 30.13     | 107.23          |
| Max Ang Jerk (rad/s <sup>2</sup> ) | 8649.15 | 1968.37         | 7076.13 | 2144.20         | 5776.75   | 1543.35         |
| Mean Acc (m/s <sup>2</sup> )       | 0.80    | 0.16            | 0.60    | 0.02            | 0.24      | 0.36            |
| Max Acc (m/s <sup>2</sup> )        | 2.18    | 15.22           | 1.64    | 14.89           | 0.83      | 6.61            |
| Mean Gyr (rad/s)                   | 0.45    | 0.05            | 0.41    | 0.07            | 0.28      | 0.01            |
| Max Gyr (rad/s)                    | 0.71    | 3.18            | 0.60    | 2.49            | 1.08      | 1.63            |
| RMS Gyr (rad/s)                    | 0.38    | 0.11            | 0.35    | 0.07            | 0.25      | 0.04            |
| RMS Acc ( m/s <sup>2</sup> )       | 0.63    | 0.42            | 0.54    | 0.59            | 0.23      | 0.59            |
| SE Acc                             | 0.15    | 0.06            | 0.15    | 0.06            | 0.18      | 0.07            |
| SE Gyr                             | 0.13    | 0.00            | 0.10    | 0.03            | 0.11      | 0.04            |

Table S3. Between-session standard error of measurement (SEM) and mean difference between the DCP and TD group. Acc= acceleration; ang vel = angular velocity; SE = sample entropy.
