# Supplementary material for: Reliability and Discriminative Validity of Wearable Sensors for the Quantification of Upper Limb Movement Disorders in Individuals with Dyskinetic Cerebral Palsy
Source: MDPI journal article supplement (doi:10.3390/s23031574), 2023-02-01
Supplement: s1 [file s1]

| WITHIN SESSION RELIABILITY |                  |                  |                  |                  |                  |                  | BETWEEN SESSION RELIABILITY |                   |                   |                   |                   |                   |
|----------------------------|------------------|------------------|------------------|------------------|------------------|------------------|-----------------------------|-------------------|-------------------|-------------------|-------------------|-------------------|
| Hand                       |                  | Forearm          |                  | Upper arm        |                  |                  | Hand                        |                   | Forearm           |                   | Upper arm         |                   |
| ICC LONG                   | ICC SHORT        | ICC LONG         | ICC SHORT        | ICC LONG         | ICC SHORT        |                  | ICC LONG                    | ICC SHORT         | ICC LONG          | ICC SHORT         | ICC LONG          | ICC SHORT         |
| REACH FORWARD              |                  |                  |                  |                  |                  |                  |                             |                   |                   |                   |                   |                   |
| Max Jerk                   | 0.70 [0.43-0.88] | 0.41 [0.24-0.64] | 0.76 [0.55-0.90] | 0.65 [0.49-0.80] | 0.38 [0.08-0.68] | 0.77 [0.64-0.88] | 0.85 [0.54-0.95]            | 0.89 [0.67-0.97]  | 0.89 [0.71-0.96]  | 0.79 [0.44-0.92]  | 0.96 [0.88-0.99]  | 0.77 [0.36-0.92]  |
| Max Ang Jerk               | 0.51 [0.19-0.88] | 0.30 [0.15-0.54] | 0.69 [0.44-0.86] | 0.45 [0.28-0.65] | 0.71 [0.47-0.87] | 0.50 [0.34-0.69] | 0.60 [0.00-0.87]            | 0.34 [-0.68-0.85] | 0.71 [0.19-0.90]  | 0.69 [0.17-0.89]  | 0.98 [0.96-0.99]  | 0.72 [0.21-0.90]  |
| Mean Acc                   | 0.90 [0.78-0.96] | 0.79 [0.65-0.90] | 0.80 [0.61-0.92] | 0.86 [0.77-0.93] | 0.80 [0.60-0.92] | 0.93 [0.87-0.96] | 0.68 [0.05-0.90]            | 0.66 [0.33-0.94]  | 0.80 [0.45-0.93]  | 0.83 [0.54-0.94]  | 0.83 [0.53-0.94]  | 0.83 [0.52-0.94]  |
| Max Acc                    | 0.76 [0.53-0.91] | 0.69 [0.53-0.84] | 0.84 [0.67-0.94] | 0.76 [0.63-0.87] | 0.50 [0.21-0.76] | 0.91 [0.85-0.96] | 0.77 [0.30-0.92]            | 0.82 [0.44-0.94]  | 0.86 [0.62-0.95]  | 0.87 [0.64-0.95]  | 0.92 [0.80-0.97]  | 0.84 [0.57-0.94]  |
| Mean Gyr                   | 0.89 [0.75-0.96] | 0.76 [0.62-0.88] | 0.87 [0.73-0.95] | 0.85 [0.75-0.92] | 0.87 [0.74-0.95] | 0.95 [0.92-0.98] | 0.77 [0.29-0.92]            | 0.86 [0.53-0.96]  | 0.91 [0.72-0.97]  | 0.84 [0.59-0.94]  | 0.91 [0.69-0.97]  | 0.93 [0.81-0.98]  |
| Max Gyr                    | 0.80 [0.60-0.93] | 0.73 [0.58-0.87] | 0.88 [0.76-0.95] | 0.72 [0.57-0.85] | 0.77 [0.55-0.90] | 0.94 [0.90-0.97] | 0.74 [0.24-0.91]            | 0.89 [0.68-0.97]  | 0.70 [0.19-0.89]  | 0.91 [0.73-0.97]  | 0.95 [0.87-0.98]  | 0.95 [0.86-0.98]  |
| RMS Acc                    | 0.91 [0.80-0.97] | 0.79 [0.66-0.90] | 0.83 [0.67-0.93] | 0.87 [0.78-0.93] | 0.76 [0.54-0.90] | 0.93 [0.88-0.97] | 0.71 [0.13-0.91]            | 0.83 [0.45-0.95]  | 0.83 [0.52-0.94]  | 0.84 [0.57-0.94]  | 0.87 [0.64-0.95]  | 0.84 [0.56-0.94]  |
| RMS Gyr                    | 0.91 [0.78-0.97] | 0.78 [0.64-0.89] | 0.90 [0.80-0.96] | 0.83 [0.73-0.91] | 0.87 [0.74-0.95] | 0.96 [0.92-0.98] | 0.81 [0.42-0.94]            | 0.88 [0.60-0.96]  | 0.91 [0.74-0.97]  | 0.87 [0.65-0.95]  | 0.94 [0.80-0.97]  | 0.94 [0.84-0.98]  |
| SE Acc                     | 0.80 [0.59-0.92] | 0.28 [0.14-0.49] | 0.85 [0.70-0.94] | 0.32 [0.17-0.53] | 0.73 [0.49-0.89] | 0.38 [0.23-0.59] | 0.88 [0.62-0.96]            | 0.65 [-0.02-0.89] | 0.94 [0.83-0.98]  | 0.78 [0.39-0.92]  | 0.86 [0.61-0.95]  | 0.79 [0.40-0.92]  |
| SE Gyr                     | 0.72 [0.46-0.89] | 0.41 [0.24-0.62] | 0.75 [0.52-0.90] | 0.38 [0.22-0.59] | 0.65 [0.38-0.84] | 0.33 [0.18-0.54] | 0.89 [0.50-0.97]            | 0.79 [0.37-0.93]  | 0.85 [0.56-0.95]  | 0.90 [0.73-0.96]  | 0.84 [0.55-0.94]  | 0.15 [-1.5-0.70]  |
| REACH & GRASP VERTICAL     |                  |                  |                  |                  |                  |                  |                             |                   |                   |                   |                   |                   |
| Max Jerk                   | 0.87 [0.74-0.94] | 0.42 [0.25-0.65] | 0.71 [0.49-0.86] | 0.32 [0.17-0.54] | 0.68 [0.45-0.85] | 0.49 [0.33-0.69] | 0.55 [-0.55-0.86]           | 0.74 [0.19-0.92]  | 0.66 [0.00-0.88]  | 0.87 [0.65-0.95]  | 0.60 [-0.2-0.86]  | 0.39 [-0.83-0.79] |
| Max Ang Jerk               | 0.84 [0.69-0.93] | 0.25 [0.10-0.48] | 0.72 [0.51-0.87] | 0.27 [0.13-0.49] | 0.66 [0.43-0.84] | 0.39 [0.24-0.60] | 0.69 [-0.02-0.91]           | 0.72 [0.12-0.92]  | 0.83 [0.50-0.94]  | 0.80 [0.50-0.92]  | 0.75 [0.27-0.92]  | 0.47 [-0.53-0.81] |
| Mean Acc                   | 0.89 [0.79-0.95] | 0.77 [0.63-0.89] | 0.82 [0.66-0.92] | 0.73 [0.59-0.85] | 0.73 [0.52-0.87] | 0.78 [0.66-0.89] | 0.58 [-0.26-0.88]           | 0.67 [-0.15-0.90] | 0.69 [-0.02-0.90] | 0.90 [0.74-0.96]  | 0.67 [0.04-0.88]  | 0.47 [-0.36-0.81] |
| Max Acc                    | 0.87 [0.75-0.94] | 0.49 [0.32-0.71] | 0.81 [0.65-0.92] | 0.40 [0.24-0.61] | 0.69 [0.47-0.86] | 0.63 [0.47-0.79] | 0.50 [-0.70-0.85]           | 0.60 [-0.13-0.88] | 0.61 [-0.14-0.87] | 0.92 [0.79-0.97]  | 0.79 [0.38-0.93]  | 0.43 [-0.60-0.80] |
| Mean Gyr                   | 0.90 [0.80-0.96] | 0.80 [0.68-0.91] | 0.85 [0.72-0.93] | 0.76 [0.62-0.87] | 0.76 [0.57-0.89] | 0.85 [0.75-0.92] | 0.81 [0.16-0.95]            | 0.76 [0.24-0.93]  | 0.90 [0.36-0.97]  | 0.49 [-0.38-0.81] | 0.77 [0.18-0.93]  | 0.77 [0.36-0.92]  |
| Max Gyr                    | 0.92 [0.84-0.97] | 0.63 [0.44-0.80] | 0.93 [0.85-0.97] | 0.52 [0.35-0.71] | 0.73 [0.52-0.87] | 0.66 [0.51-0.81] | 0.84 [0.49-0.95]            | 0.91 [0.69-0.97]  | 0.88 [0.66-0.96]  | 0.84 [0.58-0.94]  | 0.92 [0.78-0.97]  | 0.74 [0.25-0.91]  |
| RMS Acc                    | 0.91 [0.82-0.96] | 0.75 [0.61-0.88] | 0.81 [0.65-0.92] | 0.71 [0.56-0.84] | 0.77 [0.59-0.90] | 0.77 [0.64-0.88] | 0.57 [-0.19-0.86]           | 0.70 [0.00-0.91]  | 0.70 [0.13-0.90]  | 0.91 [0.78-0.97]  | 0.73 [0.23-0.91]  | 0.45 [-0.43-0.80] |
| RMS Gyr                    | 0.95 [0.89-0.98] | 0.80 [0.67-0.90] | 0.89 [0.79-0.95] | 0.71 [0.56-0.84] | 0.81 [0.65-0.92] | 0.84 [0.74-0.92] | 0.85 [0.52-0.95]            | 0.83 [0.45-0.95]  | 0.92 [0.64-0.97]  | 0.64 [0.03-0.96]  | 0.81 [0.40-0.94]  | 0.80 [0.44-0.93]  |
| SE Acc                     | 0.82 [0.66-0.92] | 0.29 [0.06-0.42] | 0.42 [0.13-0.69] | 0.18 [0.06-0.38] | 0.33 [0.04-0.63] | 0.32 [0.18-0.54] | 0.35 [-0.63-0.78]           | 0.57 [-0.31-0.87] | 0.60 [-0.07-0.86] | 0.74 [0.20-0.91]  | 0.41 [-0.6-0.79]  | 0.04 [-1.23-0.64] |
| SE Gyr                     | 0.77 [0.58-0.89] | 0.26 [0.11-0.50] | 0.42 [0.13-0.69] | 0.36 [0.20-0.57] | 0.42 [0.13-0.69] | 0.40 [0.24-0.60] | 0.42 [-0.32-0.80]           | 0.47 [-0.45-0.83] | 0.76 [0.14-0.92]  | 0.87 [0.65-0.95]  | 0.62 [-0.04-0.86] | 0.26 [-1.33-0.75] |
| REACH SIDEWAYS             |                  |                  |                  |                  |                  |                  |                             |                   |                   |                   |                   |                   |
| Max Jerk                   | 0.86 [0.70-0.94] | 0.47 [0.29-0.69] | 0.79 [0.56-0.92] | 0.48 [0.32-0.68] | 0.50 [0.18-0.77] | 0.68 [0.53-0.83] | 0.89 [0.31-0.97]            | 0.82 [0.41-0.94]  | 0.72 [0.10-0.91]  | 0.79 [0.44-0.92]  | 0.83 [0.46-0.94]  | 0.71 [0.21-0.90]  |
| Max Ang Jerk               | 0.80 [0.60-0.92] | 0.35 [0.18-0.59] | 0.75 [0.53-0.90] | 0.37 [0.21-0.58] | 0.42 [0.10-0.72] | 0.46 [0.29-0.66] | 0.86 [0.51-0.96]            | 0.64 [-0.18-0.89] | 0.85 [0.52-0.95]  | 0.69 [0.17-0.89]  | 0.79 [0.33-0.93]  | 0.73 [0.25-0.90]  |
| Mean Acc                   | 0.94 [0.87-0.98] | 0.83 [0.72-0.91] | 0.90 [0.78-0.96] | 0.78 [0.65-0.88] | 0.87 [0.72-0.95] | 0.73 [0.59-0.86] | 0.58 [-0.25-0.88]           | 0.74 [-0.10-0.93] | 0.59 [-1.5-0.87]  | 0.83 [0.54-0.87]  | 0.69 [0.09-0.90]  | 0.67 [0.15-0.88]  |
| Max Acc                    | 0.90 [0.79-0.96] | 0.69 [0.53-0.84] | 0.83 [0.63-0.93] | 0.67 [0.51-0.82] | 0.71 [0.46-0.88] | 0.65 [0.49-0.80] | 0.85 [0.31-0.96]            | 0.65 [-0.03-0.89] | 0.70 [0.01-0.91]  | 0.87 [0.64-0.95]  | 0.84 [0.51-0.95]  | 0.60 [-0.05-0.85] |
| Mean Gyr                   | 0.95 [0.89-0.98] | 0.81 [0.69-0.91] | 0.86 [0.71-0.95] | 0.78 [0.65-0.88] | 0.86 [0.71-0.95] | 0.80 [0.69-0.90] | 0.67 [-0.12-0.91]           | 0.68 [-0.13-0.90] | 0.72 [0.19-0.91]  | 0.84 [0.59-0.94]  | 0.74 [0.22-0.91]  | 0.67 [0.12-0.88]  |
| Max Gyr                    | 0.89 [0.77-0.96] | 0.69 [0.53-0.84] | 0.83 [0.66-0.93] | 0.68 [0.53-0.82] | 0.63 [0.35-0.84] | 0.72 [0.57-0.85] | 0.77 [0.21-0.94]            | 0.77 [0.15-0.93]  | 0.87 [0.61-0.96]  | 0.91 [0.73-0.97]  | 0.90 [0.70-0.97]  | 0.82 [0.51-0.93]  |
| RMS Acc                    | 0.94 [0.87-0.98] | 0.82 [0.71-0.92] | 0.89 [0.77-0.96] | 0.77 [0.65-0.88] | 0.86 [0.71-0.95] | 0.74 [0.60-0.84] | 0.62 [-0.21-0.90]           | 0.77 [-0.06-0.94] | 0.55 [-0.35-0.85] | 0.84 [0.57-0.94]  | 0.71 [0.14-0.91]  | 0.66 [0.11-0.87]  |
| RMS Gyr                    | 0.96 [0.91-0.99] | 0.83 [0.72-0.92] | 0.89 [0.76-0.96] | 0.77 [0.65-0.88] | 0.89 [0.75-0.96] | 0.82 [0.71-0.91] | 0.75 [0.00-0.93]            | 0.73 [-0.06-0.92] | 0.75 [0.26-0.92]  | 0.87 [0.65-0.95]  | 0.79 [0.38-0.93]  | 0.70 [0.21-0.89]  |
| SE Acc                     | 0.92 [0.83-0.97] | 0.29 [0.13-0.52] | 0.78 [0.57-0.91] | 0.47 [0.30-0.67] | 0.73 [0.49-0.89] | 0.40 [0.24-0.61] | 0.93 [0.72-0.98]            | 0.26 [-1.27-0.76] | 0.90 [0.68-0.97]  | 0.78 [0.39-0.92]  | 0.83 [0.44-0.95]  | 0.69 [0.12-0.89]  |
| SE Gyr                     | 0.89 [0.76-0.96] | 0.39 [0.22-0.62] | 0.69 [0.43-0.87] | 0.50 [0.34-0.70] | 0.71 [0.45-0.88] | 0.59 [0.43-0.76] | 0.79 [0.29-0.94]            | 0.55 [-0.26-0.85] | 0.88 [0.60-0.96]  | 0.90 [0.73-0.96]  | 0.86 [0.55-0.95]  | 0.75 [0.30-0.91]  |

Table S2. Within-and between -session intra-class correlation coefficients (ICC) and confidence intervals. Acc= acceleration; ang vel = angular velocity; SE = sample entropy.
