# Supplementary material for: Reliability and Discriminative Validity of Wearable Sensors for the Quantification of Upper Limb Movement Disorders in Individuals with Dyskinetic Cerebral Palsy
Source: MDPI journal article supplement (doi:10.3390/s23031574), 2023-02-01
Supplement: s1 [file s1]

| Participant | Age          | SEX | MACS level | L/R handed | Measured side |
|-------------|--------------|-----|------------|------------|---------------|
| CP1         | 12.2y        | M   | 3          | R          | L             |
| CP2         | 23.9y        | F   | 1          | R          | L             |
| CP3         | 23.9y        | F   | 1          | R          | R             |
| CP4         | 18.5y        | F   | 3          | L          | L             |
| CP5         | 25.4y        | M   | 3          | L          | R             |
| CP6         | 16.2y        | M   | 2          | R          | L             |
| CP7         | 16.2y        | M   | 2          | R          | R             |
| CP8         | 13.5y        | M   | 2          | L          | R             |
| CP9         | 19.4y        | F   | 2          | R          | L             |
| CP10        | 16.9y        | M   | 3          | R          | L             |
| CP11        | 16.9y        | M   | 3          | R          | R             |
| CP12        | 11.9y        | M   | 2          | R          | L             |
| CP13        | 11.9y        | M   | 2          | R          | R             |
| CP14        | 13.6y        | F   | 3          | R          | L             |
| CP15        | 21.6y        | F   | 3          | R          | L             |
| CP16        | 8.6y         | M   | 2          | L          | R             |
| CP17        | 22.6y        | M   | 2          | L          | R             |
| CP18        | 9.6y         | M   | 2          | R          | L             |
| CP19        | 5.0y         | M   | 3          | L          | R             |
| CP20        | 19.2y        | F   | 3          | R          | L             |
| CP21        | 21.2y        | M   | 2          | R          | L             |
| CP22        | 20.2y        | M   | 2          | L          | R             |
| <b>Mean</b> | <b>16.7y</b> |     |            |            |               |
| TD1         | 9.4y         | M   | /          | R          | L             |
| TD2         | 19.9y        | M   | /          | R          | L             |
| TD3         | 19.1y        | F   | /          | R          | L             |
| TD4         | 19.1y        | F   | /          | R          | L             |
| TD5         | 14.1y        | F   | /          | L          | R             |
| TD6         | 17.0y        | F   | /          | R          | L             |
| TD7         | 18.2y        | M   | /          | R          | L             |
| TD8         | 21.2y        | F   | /          | R          | L             |
| TD9         | 21.5y        | F   | /          | R          | L             |
| TD10        | 21.4y        | F   | /          | R          | L             |
| TD11        | 22.2y        | F   | /          | L          | R             |
| TD12        | 13.5y        | M   | /          | L          | R             |
| TD13        | 19.5y        | F   | /          | R          | L             |
| TD14        | 15.0y        | M   | /          | R          | L             |
| TD15        | 12.1y        | M   | /          | R          | L             |
| TD16        | 21.0y        | F   | /          | R          | L             |
| TD17        | 14.4y        | F   | /          | L          | R             |
| TD18        | 12.9y        | F   | /          | R          | L             |
| TD19        | 15.1y        | M   | /          | R          | L             |
| TD20        | 16.9y        | M   | /          | R          | L             |
| <b>Mean</b> | <b>17.2y</b> |     |            |            |               |

Table S1. Participant characteristics. CP = cerebral palsy; TD = typically developing; MACS = Manual Ability Classification System.
