# Supplementary material for: Reliability and Discriminative Validity of Wearable Sensors for the Quantification of Upper Limb Movement Disorders in Individuals with Dyskinetic Cerebral Palsy
Source: Sensors (Basel). 2023 Feb 1;23(3):1574. doi: 10.3390/s23031574 (PMC9921560; doi:10.3390/s23031574)
Supplement: Supplementary file 1 [file sensors-23-01574-s001.zip]

Archive with 36 entries (36 files):
- Figure_S1.pdf
- Figure_S2.pdf
- MEAN_TD_DCP.xlsx
- readme.txt
- sensor_parameters_long_hand_RF.xlsx
- sensor_parameters_long_hand_RGV.xlsx
- sensor_parameters_long_hand_RS.xlsx
- sensor_parameters_long_upperarm_RF.xlsx
- sensor_parameters_long_upperarm_RGV.xlsx
- sensor_parameters_long_wrist_RF.xlsx
- sensor_parameters_long_wrist_RGV.xlsx
- sensor_parameters_long_wrist_RS.xlsx
- sensor_parameters_short_hand_RF.xls
- sensor_parameters_short_hand_RGV.xls
- sensor_parameters_short_hand_RS.xls
- sensor_parameters_short_upperam_RF.xls
- sensor_parameters_short_upperam_RGV.xls
- sensor_parameters_short_upperam_RS.xls
- sensor_parameters_short_wrist_RF.xls
- sensor_parameters_short_wrist_RGV.xls
- sensor_parameters_short_wrist_RS.xls
- sensor_parameters_TRT_long_hand.xls
- sensor_parameters_TRT_long_upperam.xls
- sensor_parameters_TRT_long_wrist.xls
- sensor_parameters_TRT_short_hand_RF.xls
- sensor_parameters_TRT_short_hand_RGV.xls
- sensor_parameters_TRT_short_hand_RS.xls
- sensor_parameters_TRT_short_upperarm_RF.xls
- sensor_parameters_TRT_short_upperarm_RGV.xls
- sensor_parameters_TRT_short_upperarm_RS.xls
- sensor_parameters_TRT_short_wrist_RF.xls
- sensor_parameters_TRT_short_wrist_RGV.xls
- sensor_parameters_TRT_short_wrist_RS.xls
- Table_S1.pdf
- Table_S2.pdf
- Table_S3.pdf
