# Supplementary material for: Reliability and Discriminative Validity of Wearable Sensors for the Quantification of Upper Limb Movement Disorders in Individuals with Dyskinetic Cerebral Palsy
Source: Sensors (Basel). 2023 Feb 1;23(3):1574. doi: 10.3390/s23031574 (PMC9921560; doi:10.3390/s23031574)
Supplement: Supplementary file 1 [file sensors-23-01574-s001.zip › MEAN_TD_DCP.xlsx]

## Sheet: RF_HA
	MaxJerk	MaxAnfJerk	MeanAcc	MaxAcc	MeanGyr	MaxGyr	RMSGyr	RMSAcc	SE_Acc	SE_Gyr
DCP	716.141	6830.9	2.82825	35.688	2.15168	15.198	3.01655	4.47314	0.132127	0.15636
	644.58	4680.75	2.48237	28.8261	1.7393	7.9558	2.2835	3.84809	0.157999	0.161352
	723.249	4910.84	2.52314	32.8907	1.43683	7.47128	1.98854	4.25743	0.100272	0.108459
	241.526	1586.21	0.935508	12.151	0.698034	3.90646	0.912597	1.48293	0.16307	0.187436
	825.07	5616.09	3.64418	40.2024	1.63381	9.56053	2.38141	5.87506	0.0773273	0.0765702
	803.911	2648.89	2.48693	36.2425	1.17764	5.9322	1.62283	4.32494	0.119582	0.134303
	615.527	4318	2.66924	28.685	1.52531	9.71782	2.18025	4.08771	0.118493	0.128305
	899.018	3614.07	3.03696	43.6178	1.54209	8.42381	2.13729	4.76638	0.124136	0.166066
	358.21	5899.19	2.03366	19.8602	1.36407	8.41444	1.97346	3.07995	0.12702	0.117314
	713.393	3446.69	2.00517	31.579	1.04029	5.96052	1.35387	3.36887	0.146892	0.189811
	221.949	2504.38	1.92606	13.6603	0.918629	6.31911	1.21224	2.56539	0.23024	0.242798
	983.985	4727.76	2.69443	44.1271	1.4339	9.76826	2.17474	5.29156	0.0879784	0.0728956
	1130.63	5127.75	3.6854	51.0018	1.96487	12.588	2.83759	7.1969	0.126965	0.145696
	360.982	2869.27	1.30526	17.9934	0.854889	5.10986	1.22419	1.91144	0.169195	0.138553
	95.8462	1872.95	1.1074	6.89986	0.834321	4.71191	1.05762	1.38463	0.310433	0.248817
	613.991	4367.23	4.20788	28.1823	2.31035	9.17233	2.8473	5.52961	0.295895	0.342469
	854.876	4492.16	4.53113	37.4496	2.17045	9.00544	2.6469	5.87865	0.263707	0.289191
	738.071	6358.55	4.97289	35.012	2.55425	10.3151	2.98215	6.49705	0.205478	0.320642
	411.866	3184.96	3.11664	19.6896	1.50425	7.80329	1.86251	4.10275	0.262627	0.288447
	#N/A	#N/A	#N/A	#N/A	#N/A	#N/A	#N/A	#N/A	#N/A	#N/A
MEAN	629.096	4160.88	2.74697	29.6715	1.51868	8.28075	2.03661	4.20645	0.169444	0.185026
MEDIAN	713.393	4367.23	2.66924	31.579	1.50425	8.41444	2.13729	4.25743	0.146892	0.161352
IQR	428.066	1992.18	1.36099	17.0712	0.743113	3.49937	1.0258	2.18617	0.096	0.114504
TD	198.924	1660.72	2.92956	11.3583	1.50059	4.1556	1.7209	3.45892	0.406863	0.49644
	251.295	1404.82	3.53165	14.7197	1.46931	4.37481	1.75424	4.30091	0.372157	0.34081
	227.873	2300.21	2.56924	13.4149	1.13345	4.64175	1.58043	3.64509	0.117699	0.130063
	411.452	2738.67	3.72525	21.0226	1.55816	6.77253	2.13766	5.13472	0.147212	0.156194
	275.18	2675.52	2.2203	13.1912	1.65747	7.6846	2.3496	3.10386	0.155625	0.122497
	284.967	2483.89	2.44692	14.4997	1.21647	5.80289	1.70443	3.37321	0.121484	0.114806
	572.599	3370.65	2.51539	26.3202	1.36407	6.43313	1.92001	3.80792	0.126713	0.110153
	264.867	1965.33	1.68398	12.2351	0.829593	3.87572	1.18045	2.46979	0.0814062	0.08033
	175.253	1734.09	1.45584	8.65778	0.752127	3.92147	1.06476	2.04109	0.121064	0.117674
	264.991	2597.09	1.8699	12.2042	1.03971	4.64007	1.45285	2.63638	0.0936078	0.0908666
	382.562	3056.72	2.46434	17.839	1.21248	5.77504	1.7245	3.54562	0.0874236	0.0873035
	337.046	1946.07	2.24982	16.3505	1.00121	4.23723	1.44448	3.34426	0.0556768	0.0607734
	295.015	3108.31	3.43307	17.1908	1.66042	6.48529	2.32528	4.84226	0.117091	0.125437
	254.327	1533.68	2.33055	12.7782	1.3841	5.35376	1.82581	3.02004	0.215794	0.178239
	197.366	1803.38	3.07048	9.99792	1.31777	5.00123	1.5862	3.58738	0.388304	0.360222
	136.148	1470.11	2.51481	7.72999	1.25149	3.99521	1.55189	3.10444	0.273024	0.271055
	282.311	2465.5	2.94706	14.0384	1.5393	4.65138	1.81221	3.43811	0.425376	0.396179
	172.475	1690.58	2.86139	10.2486	1.3785	4.13384	1.5605	3.24701	0.370548	0.424581
	242.5	1421.11	2.4461	11.5247	1.09092	3.15284	1.3195	2.91323	0.313115	0.302787
	238.289	2414.54	4.39837	16.4535	2.12303	6.94713	2.56942	5.20303	0.323977	0.308835
	#N/A	#N/A	#N/A	#N/A	#N/A	#N/A	#N/A	#N/A	#N/A	#N/A
MEAN	273.272	2192.05	2.6832	14.0888	1.32401	5.10178	1.72926	3.51087	0.215708	0.213762
MEDIAN	259.597	2132.77	2.5151	13.303	1.34092	4.64657	1.71267	3.40566	0.151419	0.143129
IQR	66.8435	933.583	0.667546	4.89318	0.387451	1.81029	0.322228	0.602889	0.218073	0.203187
	#N/A	#N/A	#N/A	#N/A	#N/A	#N/A	#N/A	#N/A	#N/A	#N/A

## Sheet: RGV_HA
	MaxJerk	MaxAnfJerk	MeanAcc	MaxAcc	MeanGyr	MaxGyr	RMSGyr	RMSAcc	SE_Acc	SE_Gyr
DCP	1288.69	11727.8	3.00588	59.2089	2.32889	16.5118	3.38007	5.64926	0.114097	0.158271
	743.169	4798.28	1.97545	32.8748	1.37184	9.79441	2.17802	3.70003	0.0874138	0.0638087
	846.445	6505.7	2.38548	36.0453	1.44244	10.6844	2.19634	4.43419	0.101453	0.0948055
	280.043	2511.87	1.0902	13.9697	0.889865	4.28344	1.15467	1.59182	0.195819	0.201439
	959.848	4260.39	2.54046	40.7088	1.0451	8.34508	1.67887	5.15684	0.0710736	0.0698919
	472.375	3737.84	1.39752	22.5447	0.91678	7.45321	1.44176	2.37283	0.0957895	0.0862593
	410.087	4361.52	2.1401	22.8012	1.41163	7.53201	2.02966	3.14313	0.153081	0.127491
	707.746	4326.07	2.41469	32.7342	1.29572	9.53025	1.96904	3.77437	0.116157	0.116747
	395.758	6385.14	1.94294	20.9341	1.3187	11.0513	1.95769	2.85313	0.135029	0.119179
	975.801	5585.21	2.02786	42.9057	1.16468	8.83132	1.63895	3.67979	0.143549	0.160977
	236.926	2607.02	1.6483	12.6705	0.790638	5.7246	1.06878	2.2056	0.249756	0.241729
	656.287	6497.57	2.1572	30.4806	1.5996	11.655	2.33403	3.71693	0.110658	0.0953891
	913.853	5907.41	2.09321	41.7025	1.31417	10.5868	2.07555	4.22666	0.0816584	0.0765367
	356.047	3027.55	1.3457	19.6036	0.970616	6.74745	1.42378	2.0766	0.136342	0.119741
	729.227	5528.67	3.80422	36.379	2.18205	9.59472	2.70872	5.0646	0.311301	0.310105
	719.849	4502.38	3.85195	35.4893	2.02205	11.1172	2.5489	5.27244	0.214051	0.290591
	941.965	7394.93	5.5285	42.4792	2.92308	11.7507	3.59894	7.45643	0.268582	0.342628
	601.45	3373.31	2.85392	29.2544	1.59857	8.39877	2.16016	3.93187	0.238797	0.186469
	#N/A	#N/A	#N/A	#N/A	#N/A	#N/A	#N/A	#N/A	#N/A	#N/A
MEAN	679.754	5168.81	2.45576	31.8215	1.47702	9.42179	2.08577	3.90592	0.156923	0.159003
MEDIAN	713.797	4650.33	2.14865	32.8045	1.34527	9.56248	2.0526	3.74565	0.135686	0.123616
IQR	471.342	2397.23	0.82449	17.0175	0.524344	3.22426	0.650679	1.98136	0.105738	0.102745
	#N/A	#N/A	#N/A	#N/A	#N/A	#N/A	#N/A	#N/A	#N/A	#N/A
TD	193.313	2032.06	2.45036	10.1578	1.46207	5.204	1.86444	3.01892	0.310305	0.269716
	281.895	1456.18	3.34749	13.7177	1.52632	4.70216	1.8711	4.14391	0.355245	0.291578
	355.804	2610.32	2.25332	18.8289	1.07117	4.64261	1.533	3.46496	0.0902838	0.0969864
	514.159	4252.79	3.10971	20.3399	1.48444	9.17208	2.2142	4.46689	0.121724	0.136266
	307.975	3071.98	1.7402	14.2906	1.22067	6.5447	1.77347	2.56007	0.125053	0.118999
	249.713	2796.18	1.9732	13.528	1.07219	7.42418	1.56345	2.74575	0.139771	0.118344
	461.449	2730.45	2.0358	22.0644	1.08242	6.40115	1.57863	3.09218	0.117091	0.105339
	225	2205.67	1.29829	11.4937	1.05371	6.12494	1.59696	1.92404	0.119097	0.0988056
	174.234	1779.06	1.41778	9.16498	0.952026	5.97501	1.42097	2.03163	0.128738	0.11035
	219.668	1873.34	1.38989	10.2192	1.21052	5.77927	1.71286	1.93754	0.140536	0.129446
	418.109	3323.68	1.90952	19.7688	1.262	7.46637	1.98736	3.09124	0.0795478	0.0683154
	274.35	2319.5	1.91488	14.7337	1.07033	6.75044	1.68261	2.93305	0.0609313	0.0576556
	286.617	2934.92	3.73787	17.1727	2.2191	8.04676	2.77946	4.63702	0.32796	0.290042
	257.229	2287.04	2.27463	12.8243	1.43255	6.58129	1.99129	2.99222	0.216908	0.17106
	212.571	1696.48	2.40621	11.8192	1.45802	6.17817	1.95104	2.97028	0.290768	0.207537
	157.472	1923.58	2.29822	9.45666	1.3427	5.56535	1.77343	2.97032	0.219755	0.194092
	220.52	2431.57	2.43248	12.1691	1.50172	6.33694	1.90199	2.94711	0.374748	0.300221
	343.97	2271.44	2.88878	16.3778	1.75718	5.53996	2.13963	3.44778	0.339549	0.327825
	224.982	2278.13	2.23764	10.9619	1.31701	5.27853	1.70875	2.78634	0.263999	0.213875
	353.116	3472.97	3.84945	20.1055	2.25522	7.97335	2.82786	4.73099	0.370821	0.290853
	#N/A	#N/A	#N/A	#N/A	#N/A	#N/A	#N/A	#N/A	#N/A	#N/A
MEAN	286.607	2487.37	2.34829	14.4597	1.38757	6.38436	1.89363	3.14461	0.209642	0.179865
MEDIAN	265.789	2303.27	2.26398	13.6229	1.32985	6.25755	1.81895	2.98127	0.178722	0.153663
IQR	125.949	825.928	0.646424	6.22602	0.408892	1.35987	0.327145	0.67588	0.193652	0.165701
	#N/A	#N/A	#N/A	#N/A	#N/A	#N/A	#N/A	#N/A	#N/A	#N/A

## Sheet: RS_HA
	MaxJerk	MaxAnfJerk	MeanAcc	MaxAcc	MeanGyr	MaxGyr	RMSGyr	RMSAcc	SE_Acc	SE_Gyr
DCP	625.535	6866.26	2.32362	31.6901	1.99962	14.057	2.5843	3.35405	0.194215	0.232319
	554.675	6324.59	3.00336	27.341	2.05952	11.5224	2.75756	4.39551	0.132976	0.130191
	740.938	6659.82	3.23457	34.2048	1.96497	11.5827	2.63106	5.07016	0.118037	0.128082
	378.364	2015.06	1.62374	17.2624	1.32505	5.168	1.71739	2.37138	0.193435	0.172811
	496.911	3396.77	3.46402	27.7312	1.81017	7.09641	2.40801	4.89513	0.11222	0.121486
	522.957	3192.05	2.39373	27.5405	1.27341	6.23459	1.83088	3.82569	0.0511821	0.0542828
	733.126	4017.66	4.93668	36.0471	2.0644	8.2775	2.84485	7.3405	0.0716692	0.0823232
	760.696	4971.55	2.88032	41.6162	1.74718	10.6192	2.48989	4.65827	0.112195	0.134366
	590.644	6386.06	3.24954	26.2846	2.08535	11.5247	2.86545	4.70596	0.170279	0.16714
	645.327	2724.45	2.24817	30.3324	1.47124	6.03094	1.91298	3.56777	0.126735	0.136937
	325.993	3768.71	1.82349	16.0844	1.10569	7.36643	1.44147	2.44712	0.256127	0.254809
	633.272	4962.49	2.50564	30.3608	1.79281	9.02884	2.45202	4.21455	0.102174	0.106668
	1052.44	7385.94	3.91058	49.285	2.31611	13.7345	3.21954	6.92411	0.0981717	0.108375
	297.981	1996.14	1.4023	15.3316	0.899079	4.44059	1.2012	1.98763	0.19546	0.177177
	349.55	2563.29	1.84343	16.6452	1.52431	6.77042	1.78862	2.28942	0.26599	0.279125
	579.513	4926.06	4.31556	26.7826	2.73219	9.25415	3.37713	5.42502	0.338865	0.304777
	922.138	6155.23	4.85995	41.3639	2.65317	10.8074	3.07151	6.43391	0.243515	0.315552
	879.552	7954.53	4.94373	42.5338	2.82913	12.5528	3.41702	7.11176	0.229543	0.309408
	303.88	3296.12	3.70679	16.3236	2.02361	8.59059	2.52726	4.6461	0.258421	0.248036
	#N/A	#N/A	#N/A	#N/A	#N/A	#N/A	#N/A	#N/A	#N/A	#N/A
MEAN	599.657	4713.83	3.08785	29.198	1.87774	9.19259	2.44938	4.50864	0.172169	0.182309
MEDIAN	590.644	4926.06	3.00336	27.7312	1.96497	9.02884	2.52726	4.6461	0.170279	0.16714
IQR	299.394	3111.24	1.52279	13.3524	0.5771	4.5901	0.983224	1.78667	0.124321	0.126639
TD	206.609	2457.06	3.31187	10.738	2.16159	5.31913	2.51172	3.86473	0.418468	0.308613
	260.483	1583.9	4.52485	12.5517	2.33063	5.2613	2.71774	5.09485	0.395042	0.269941
	261.719	2927	3.47574	15.1155	1.41915	5.02678	1.93781	4.61237	0.118719	0.112314
	470.71	3771.47	4.29113	24.1623	2.06211	8.1378	2.92741	6.02742	0.080964	0.0646539
	228.961	3262.7	2.61058	12.1416	1.76244	7.62046	2.47045	3.58742	0.1289	0.124015
	201.187	1641.4	2.56176	11.1526	1.37404	5.38847	1.93974	3.46927	0.124805	0.0984621
	509.284	4202.2	2.69338	22.7339	1.65018	6.95331	2.24055	3.84444	0.145925	0.122316
	283.775	3302.31	2.16126	15.2184	1.27527	6.39326	1.82061	3.11334	0.0986583	0.0825415
	242.98	2254.6	2.06472	13.5229	1.08422	5.74308	1.57815	2.95924	0.0911469	0.079477
	209.166	2107.49	2.27457	10.4261	1.46213	4.75138	1.98728	2.96041	0.10264	0.0829331
	433.299	3357.81	3.16032	20.4433	1.46512	6.8045	2.0312	4.37264	0.0717026	0.0714692
	248.106	2687.8	2.38741	13.9892	1.31273	5.69746	2.01015	3.52682	0.0403336	0.03717
	382.591	4262.23	6.03414	20.0466	2.94367	7.04518	3.37443	6.96356	0.209093	0.258784
	226.442	2441.61	3.07694	12.0012	2.08839	5.98349	2.53806	3.71544	0.344174	0.218207
	194.681	2874.14	3.33737	11.5688	1.96605	6.05316	2.48938	4.11717	0.255591	0.188858
	146.583	1860.78	3.29575	9.78773	2.01908	5.45597	2.52346	4.01372	0.27181	0.190135
	156.478	2333.93	3.09808	8.99339	1.89138	5.45815	2.2276	3.51872	0.411329	0.30657
	219.498	2119.07	3.58061	11.4893	1.9743	5.4357	2.2074	3.94135	0.422816	0.365885
	213.469	1543.44	2.4729	10.5618	1.35493	3.78625	1.63077	2.90244	0.313508	0.225559
	238.875	3918.17	4.53301	12.9533	3.05368	7.9373	3.54615	5.07629	0.510447	0.373445
	#N/A	#N/A	#N/A	#N/A	#N/A	#N/A	#N/A	#N/A	#N/A	#N/A
MEAN	266.745	2745.46	3.24732	13.9799	1.83255	6.01261	2.3355	4.08408	0.227804	0.179068
MEDIAN	233.918	2572.43	3.1292	12.3467	1.82691	5.72027	2.23407	3.85458	0.177509	0.156437
IQR	58.7061	1200	0.962416	4.09226	0.660806	1.47056	0.551711	0.926214	0.255246	0.178738
	#N/A	#N/A	#N/A	#N/A	#N/A	#N/A	#N/A	#N/A	#N/A	#N/A

## Sheet: RF_WR
	MaxJerk	MaxAnfJerk	MeanAcc	MaxAcc	MeanGyr	MaxGyr	RMSGyr	RMSAcc	SE_Acc	SE_Gyr
DCP	439.942	6105.15	2.59302	22.5009	1.45751	10.5107	1.97374	3.52138	0.176012	0.184766
	490.154	3323.65	2.45117	23.1885	1.29484	7.14562	1.74213	3.45622	0.164611	0.152893
	543.771	5199.56	2.42479	25.8147	1.14773	6.87637	1.59522	3.61996	0.104217	0.11299
	225.476	1025.87	1.29034	10.5909	0.55652	2.45519	0.722367	1.59237	0.189486	0.155643
	459.811	1887.4	3.06578	26.4084	1.15736	5.58609	1.67048	4.30236	0.0913983	0.0768052
	575.161	1812.6	1.93304	26.6756	0.914741	4.64508	1.24524	3.19826	0.122423	0.131744
	403.64	1764.35	2.43728	20.1071	1.10871	4.91763	1.60728	3.17867	0.173715	0.115028
	661.539	2823.12	2.72829	32.532	1.12994	5.77659	1.6109	3.89813	0.141424	0.139011
	256.202	3028.27	2.03917	14.8831	0.955284	5.66054	1.33785	2.65174	0.180575	0.153731
	552.612	2092.05	1.96694	24.3353	0.783076	3.99299	1.02132	2.87363	0.141884	0.198621
	154.018	2601.27	1.71337	12.1338	0.804699	4.23523	1.05986	2.22879	0.229563	0.211728
	685.174	2243.36	2.25384	31.4631	1.16377	6.30511	1.71872	3.85419	0.100353	0.066876
	823.552	3226.64	2.93917	37.2668	1.42705	8.17177	2.01282	5.19824	0.128148	0.123323
	274.088	1696.52	1.65657	15.9647	0.630944	3.29572	0.921544	1.96081	0.249054	0.138504
	70.3646	873.824	1.41087	5.18407	0.584543	2.15066	0.717814	1.58799	0.323265	0.246834
	898.611	9195.25	6.02584	45.5461	3.27634	16.7554	4.02499	8.08967	0.283476	0.356747
	434.631	2906.06	3.54525	20.875	1.71093	6.45544	2.05896	4.31186	0.372236	0.367226
	117.654	3369.04	1.36179	9.18468	0.737845	5.74476	1.01119	1.59613	0.355498	0.221452
	1062.98	7224.97	4.20144	55.4085	2.18296	16.2251	3.00564	7.045	0.12111	0.213597
	623.661	2755.36	4.04598	28.8192	1.74268	6.62565	2.13675	5.10107	0.275933	0.246274
	528.606	2787.39	3.94406	26.5263	2.01031	6.44424	2.35547	5.03899	0.232915	0.295005
	285.47	1242.2	2.60351	14.6039	0.973218	3.79166	1.23399	3.1788	0.314553	0.217065
	#N/A	#N/A	#N/A	#N/A	#N/A	#N/A	#N/A	#N/A	#N/A	#N/A
MEAN	480.324	3144.72	2.66507	24.0915	1.26141	6.53489	1.67201	3.70383	0.203266	0.187539
MEDIAN	474.983	2771.37	2.44422	23.7619	1.13883	5.76068	1.60909	3.4888	0.178294	0.170204
IQR	334.603	1468.1	1.09261	13.1298	0.617689	2.476	0.89966	1.60227	0.137746	0.0869216
TD	176.898	1256.45	2.73119	9.23798	1.38365	4.17184	1.64232	3.08838	0.436932	0.388307
	156.559	1224.09	3.12096	11.4464	1.44028	4.46516	1.77581	3.67129	0.403439	0.291659
	161.489	1252.63	2.41882	10.0061	1.03434	4.40326	1.49038	3.06873	0.14858	0.115089
	341.155	1906.85	3.43542	17.5464	1.33485	5.22251	1.86345	4.44722	0.147786	0.135093
	188.29	1907.66	2.15156	11.1545	1.25084	5.55833	1.75514	2.65453	0.174562	0.129343
	191.559	1643.86	2.18636	10.4895	0.919912	3.99005	1.28433	2.77784	0.144434	0.120298
	381.855	1712.64	2.29377	18.7313	0.993113	4.10949	1.39703	3.13426	0.144977	0.109552
	185.474	1440.79	1.75035	9.46886	0.693765	3.24503	1.00918	2.16763	0.104513	0.0797277
	154.272	1383.05	1.65034	7.76878	0.629797	3.01272	0.895047	1.97554	0.181943	0.119596
	169.454	1180.09	1.86266	9.36995	0.892308	3.78942	1.28482	2.27707	0.102659	0.0797436
	259.396	1382.27	2.36853	12.3148	1.00034	4.071	1.46206	2.9464	0.101353	0.0776738
	251.795	1521	2.31056	13.6607	0.748667	2.79051	1.08723	2.95202	0.0658428	0.0591019
	185.969	1911.56	2.97806	13.485	1.2387	5.03451	1.74282	3.73216	0.138672	0.122124
	167.668	1159.31	2.32582	9.84736	0.991808	3.49767	1.32208	2.75316	0.272536	0.177626
	147.107	1397.45	2.8432	8.8514	1.05065	3.69716	1.26997	3.17196	0.406274	0.304113
	114.965	1254.07	2.4767	7.42227	1.09777	3.94027	1.42629	2.84589	0.350932	0.225593
	162.857	1313.41	2.37533	9.33423	1.01855	3.07607	1.2247	2.69639	0.403872	0.341099
	129.878	1096.42	2.55745	9.04619	1.13184	3.05271	1.3232	2.91243	0.322833	0.326556
	195.976	984.916	2.3299	9.67332	0.943434	2.83264	1.19399	2.65429	0.350981	0.214787
	111.994	1154.21	3.77949	11.0487	1.5056	5.01981	1.90552	4.33936	0.2877	0.225986
	#N/A	#N/A	#N/A	#N/A	#N/A	#N/A	#N/A	#N/A	#N/A	#N/A
MEAN	191.731	1404.14	2.49732	10.9952	1.06501	3.94901	1.41777	3.01333	0.234541	0.182153
MEDIAN	173.176	1347.84	2.37193	9.92672	1.02645	3.96516	1.36012	2.92942	0.178252	0.132218
IQR	36.6756	338.623	0.492272	2.35333	0.304181	1.21595	0.408791	0.457761	0.207951	0.1287
	#N/A	#N/A	#N/A	#N/A	#N/A	#N/A	#N/A	#N/A	#N/A	#N/A

## Sheet: RGV_WR
	MaxJerk	MaxAnfJerk	MeanAcc	MaxAcc	MeanGyr	MaxGyr	RMSGyr	RMSAcc	SE_Acc	SE_Gyr
DCP	943.26	6480.34	2.80531	42.2423	1.59835	11.9852	2.29213	4.43605	0.129181	0.17521
	588.837	3337.84	2.14778	27.3214	0.996502	7.57746	1.55468	3.33888	0.0880685	0.0727192
	565.094	5050.23	2.41983	26.5891	1.06617	8.42132	1.63678	3.63133	0.105616	0.103904
	245.801	1547.57	1.42535	11.2945	0.690015	3.53315	0.923578	1.67895	0.252264	0.162144
	798.254	2573.51	2.47806	36.3523	0.744551	4.99072	1.18455	4.62082	0.0749161	0.0662422
	308.854	2357.36	1.26898	16.0364	0.581279	4.32644	0.924433	1.8932	0.110428	0.09565
	345.204	1391.39	2.11968	19.1816	0.842852	4.06288	1.22177	2.71293	0.197844	0.132196
	510.685	2286.07	2.27466	23.3914	0.897951	6.57989	1.41097	3.10757	0.148006	0.10461
	226.343	3439.25	1.89456	13.854	0.893585	6.43313	1.29262	2.451	0.159847	0.139562
	674.065	2561.37	1.99373	30.4852	0.795179	6.12159	1.12125	3.09616	0.144833	0.15775
	206.99	2550.62	1.62533	10.9562	0.673133	4.11584	0.919698	1.99944	0.260731	0.234612
	468.461	2546.15	2.11849	22.6466	1.07797	6.30285	1.54934	3.10028	0.12275	0.0834478
	718.756	2363.6	2.12815	32.1034	0.920012	6.13884	1.45257	3.43342	0.0839949	0.0682736
	238.317	2255.96	1.60943	13.8635	0.694093	4.02295	1.00444	1.95048	0.217314	0.123596
	1031.34	7324.02	4.68412	46.836	2.59728	16.0824	3.24009	6.34154	0.306525	0.344538
	478.752	2367.05	3.27922	23.7696	1.49145	5.6339	1.80086	4.03278	0.370538	0.352003
	146.058	2578.04	1.42674	9.03972	0.816774	7.01096	1.14019	1.66656	0.353807	0.214808
	1074.25	10009.7	2.8127	54.6379	1.49856	18.9161	2.29428	4.92443	0.100248	0.147527
	632.983	2788.05	3.57502	30.3374	1.56805	8.5028	2.00251	4.67516	0.26406	0.243299
	578.81	2947.73	4.33311	27.8858	2.07089	6.26182	2.46403	5.40674	0.326588	0.336135
	409.997	2032.88	2.34653	19.1151	0.957012	3.81889	1.22374	2.95844	0.299267	0.238666
	#N/A	#N/A	#N/A	#N/A	#N/A	#N/A	#N/A	#N/A	#N/A	#N/A
MEAN	532.91	3370.89	2.41747	25.6162	1.1177	7.18282	1.55498	3.40267	0.196039	0.171281
MEDIAN	510.685	2561.37	2.14778	23.7696	0.920012	6.26182	1.41097	3.10757	0.159847	0.147527
IQR	365.211	980.479	0.910752	14.4489	0.696272	3.25103	0.660665	1.98505	0.153632	0.130708
TD	172.141	1949.13	2.5667	9.55396	1.09098	4.04895	1.38869	2.96998	0.363538	0.244744
	151.6	1267.96	3.0797	9.57096	1.24245	3.84692	1.55991	3.60877	0.381406	0.270312
	222.267	1457.73	2.22272	13.5565	0.93473	3.84927	1.34064	2.99676	0.110876	0.104399
	246.513	2031.49	3.03408	14.3581	1.05956	6.23009	1.58171	4.02583	0.106104	0.101731
	243.718	2037.71	1.94393	11.8289	0.896668	5.27385	1.27184	2.44353	0.136925	0.122186
	207.139	2362	1.98485	11.1938	0.803793	5.31868	1.14722	2.50579	0.156404	0.131836
	358.762	2151.32	2.0128	17.032	0.877112	4.32729	1.2374	2.69399	0.131235	0.108606
	160.047	1677.8	1.50498	9.20468	0.734333	4.53539	1.12473	1.84984	0.159427	0.10158
	176.744	1903.94	1.60037	8.33988	0.720455	4.69396	1.0969	1.97938	0.17404	0.107021
	127.932	1213.71	1.48876	7.10767	0.804415	3.674	1.17674	1.77477	0.201709	0.105345
	247.335	2061.88	2.00167	12.7958	0.882374	5.54666	1.40661	2.62625	0.0916714	0.0742832
	216.618	1713.97	2.08617	11.8938	0.730196	4.95618	1.11759	2.64293	0.068785	0.0657846
	169.172	2073.6	3.40675	12.396	1.34551	4.6999	1.69698	4.01773	0.322828	0.274615
	202.694	1617.72	2.38034	10.7803	0.994136	4.36547	1.42349	2.88927	0.294133	0.142059
	157.605	1106.95	2.32103	9.92205	0.930003	4.07719	1.22145	2.71986	0.317305	0.2441
	131.378	1406.73	2.27757	8.37778	1.12029	4.49275	1.54071	2.77504	0.315077	0.16285
	138.829	1248.34	2.19558	9.00395	0.916248	3.42314	1.16694	2.54751	0.40743	0.26609
	194.749	1300.51	2.58421	10.7366	1.38502	4.62539	1.72318	2.9831	0.339143	0.252828
	174.903	1517.66	2.25892	8.91771	0.992021	4.04687	1.34227	2.655	0.288462	0.146042
	179.352	1691.86	3.46215	13.076	1.49181	4.83662	1.89447	4.08248	0.362385	0.252561
	#N/A	#N/A	#N/A	#N/A	#N/A	#N/A	#N/A	#N/A	#N/A	#N/A
MEAN	193.975	1689.6	2.32066	10.9823	0.997605	4.54343	1.37297	2.83939	0.236444	0.163949
MEDIAN	178.048	1684.83	2.24082	10.7584	0.932367	4.51407	1.34145	2.70692	0.245086	0.136948
IQR	58.594	652.868	0.573618	3.34142	0.239368	0.818079	0.371223	0.449433	0.191404	0.141589
	#N/A	#N/A	#N/A	#N/A	#N/A	#N/A	#N/A	#N/A	#N/A	#N/A

## Sheet: RS_WR
	MaxJerk	MaxAnfJerk	MeanAcc	MaxAcc	MeanGyr	MaxGyr	RMSGyr	RMSAcc	SE_Acc	SE_Gyr
DCP	426.765	3211.11	2.2018	22.0185	1.43145	7.63936	1.79349	2.84877	0.240031	0.258861
	492.917	4160.21	2.87871	25.1769	1.76205	8.39111	2.33746	4.00881	0.157961	0.128127
	634.33	6333.14	3.02127	33.0596	1.69276	10.0892	2.29516	4.38972	0.143493	0.112023
	328.788	1455.02	1.6834	15.4131	0.966398	4.02648	1.29616	2.16649	0.256626	0.145171
	341.203	2258.27	2.98448	21.4196	1.62727	5.29519	2.16628	3.94741	0.125664	0.0913576
	376.67	2807.2	2.00564	22.4113	1.18872	5.42427	1.70343	3.04053	0.050098	0.0473866
	497.899	2734.6	4.22296	29.5635	1.7703	5.8663	2.45133	5.81673	0.0888447	0.0873844
	649.331	5428.79	2.61571	35.2691	1.42285	9.71367	2.07755	3.86725	0.112504	0.108866
	422.823	4119.38	2.95768	20.6309	1.62858	9.14014	2.20557	3.83657	0.212715	0.17304
	528.162	2690.03	2.14787	24.8548	1.17516	4.72085	1.55754	3.04174	0.138273	0.129349
	256.856	2597.81	1.59163	13.8521	0.898462	6.72843	1.21157	2.02801	0.271891	0.211995
	443.427	5042.56	2.17767	22.4745	1.49343	8.27646	2.02409	3.24339	0.126053	0.0809225
	844.074	2851.3	3.23656	39.0741	1.82188	7.87241	2.50587	5.22176	0.102661	0.0797781
	240.336	1764.18	1.68661	13.2046	0.761395	3.90915	1.04951	2.04913	0.227471	0.142665
	201.465	1272.9	1.77141	10.3531	1.1763	3.50422	1.40391	2.09779	0.269107	0.215655
	1095.89	8445.58	6.49872	55.3386	3.90372	17.0829	4.69575	9.19736	0.240496	0.362547
	440.725	3894.99	3.52104	22.2408	2.12798	5.75933	2.53025	4.21467	0.425141	0.309184
	236.248	4993.33	2.21252	12.4487	1.66057	10.313	2.12472	2.65254	0.360649	0.245729
	1101.47	7896.81	4.10168	61.5974	2.10336	14.1368	2.97747	7.07009	0.101026	0.142396
	721.507	2760.77	4.1253	34.4265	2.2434	6.71563	2.55491	5.4828	0.24476	0.311546
	703.86	2975.09	3.83219	33.0406	2.52264	7.81811	2.95493	5.51477	0.221463	0.256219
	195.968	1630.72	3.03311	11.509	1.47069	5.03861	1.87844	3.52955	0.341453	0.191338
	#N/A	#N/A	#N/A	#N/A	#N/A	#N/A	#N/A	#N/A	#N/A	#N/A
MEAN	508.214	3696.54	2.93218	26.3353	1.67497	7.61189	2.17252	4.05754	0.202654	0.174161
MEDIAN	442.076	2913.19	2.9182	22.4429	1.62792	7.18389	2.1455	3.85191	0.217089	0.143918
IQR	313.689	2164.19	1.2946	16.3373	0.561733	3.62543	0.766292	2.11704	0.127898	0.128555
TD	212.574	1469.86	2.90069	10.2465	2.15092	5.28801	2.56718	3.35374	0.441261	0.223298
	175.56	1301.82	3.64123	9.54117	2.25442	4.72282	2.65826	4.07189	0.473396	0.205459
	199.546	1227	3.07425	12.4999	1.36626	4.86589	1.93508	3.85584	0.134058	0.100614
	394.828	1852.1	3.79534	19.8906	1.83351	7.58781	2.6887	5.07283	0.0784303	0.0630692
	192.253	2213.03	2.36968	9.89817	1.55673	6.62355	2.25887	2.93809	0.171033	0.108155
	153.876	1142.57	2.34449	9.20849	1.25517	4.68721	1.7883	2.89529	0.141233	0.0776743
	376.48	2787.38	2.43705	18.4491	1.48435	6.27313	2.03055	3.24382	0.169197	0.101616
	232.273	1952.73	2.10608	11.8895	1.13448	4.96786	1.64805	2.63763	0.116439	0.0794886
	201.996	1589.52	2.17358	11.9053	0.965572	4.56606	1.42262	2.72861	0.132118	0.0833358
	149.866	1037.52	2.15448	9.08019	1.35032	4.47641	1.85723	2.58748	0.106848	0.0702678
	302.183	1714.09	2.96919	15.3314	1.24791	5.38006	1.76263	3.7179	0.0784101	0.0728434
	273.71	1835.83	2.44701	13.6474	1.21592	5.23656	1.86264	3.13247	0.0449736	0.0357127
	253.476	2246.92	4.79679	15.5268	2.36532	5.19264	2.76989	5.5022	0.290941	0.218118
	169.807	1224.94	2.86902	9.73416	1.6956	4.31272	2.13212	3.33078	0.379056	0.172368
	140.263	1195.14	3.01297	9.23353	1.76281	5.10782	2.29374	3.47779	0.338329	0.144331
	127.382	1275.17	3.00426	8.74287	1.88375	5.61821	2.42482	3.45953	0.376849	0.147663
	92.2211	1283.87	2.60815	6.55989	1.51648	4.42276	1.8384	2.86624	0.449053	0.230268
	142.568	1337.98	3.19863	8.46134	1.57721	3.80543	1.81744	3.4617	0.439936	0.286914
	178.032	786.349	2.40081	9.40985	1.24119	3.26232	1.5299	2.69087	0.388987	0.154187
	169.79	1572.89	3.84415	9.55097	2.34106	5.97231	2.83173	4.2701	0.534112	0.288474
	#N/A	#N/A	#N/A	#N/A	#N/A	#N/A	#N/A	#N/A	#N/A	#N/A
MEAN	206.934	1552.33	2.90739	11.4404	1.60995	5.11848	2.10591	3.46474	0.264233	0.143193
MEDIAN	185.143	1403.92	2.88485	9.81616	1.53661	5.03784	1.98282	3.34226	0.230987	0.126243
IQR	84.6998	613.411	0.712319	3.5595	0.592715	0.895951	0.650255	0.864357	0.273526	0.129589
	#N/A	#N/A	#N/A	#N/A	#N/A	#N/A	#N/A	#N/A	#N/A	#N/A

## Sheet: RF_UA
	MaxJerk	MaxAnfJerk	MeanAcc	MaxAcc	MeanGyr	MaxGyr	RMSGyr	RMSAcc	SE_Acc	SE_Gyr
DCP	134.898	1399.6	1.4891	8.40637	0.967971	3.88981	1.24802	1.85593	0.252153	0.172913
	91.7267	1469.32	1.14045	6.21657	0.984261	3.35458	1.27841	1.47031	0.19605	0.147227
	115.231	2421.45	1.13308	6.72832	0.936326	3.63798	1.24119	1.543	0.12583	0.0970292
	56.7012	985.273	0.856839	3.51762	0.600815	3.06644	0.823117	0.940608	0.273965	0.110193
	108.262	1805.05	1.73871	7.56211	1.24428	4.6987	1.75476	2.34658	0.0814191	0.0625378
	97.8488	917.587	1.05011	5.69464	0.882939	3.23729	1.17465	1.34764	0.163986	0.0996626
	131.093	1309.76	1.30268	7.65563	0.936523	4.22258	1.30005	1.64203	0.306281	0.153998
	223.574	2036.88	1.76073	13.5696	1.03151	4.7112	1.42306	2.21934	0.256634	0.147057
	156.489	1961.03	1.24474	10.4261	0.922817	4.29381	1.24839	1.61856	0.239817	0.149874
	171.785	1577.57	1.42733	9.45994	0.847589	3.00316	1.05456	1.70757	0.256549	0.164181
	103.414	1470.94	1.16318	6.94519	0.646317	3.28902	0.863359	1.41504	0.239902	0.166121
	90.6959	1655.54	1.36053	7.46584	1.08648	3.95311	1.5198	1.67145	0.148422	0.0683251
	275.25	2876.24	1.94514	15.1559	1.58346	5.71974	2.06071	2.76548	0.151773	0.120358
	71.0837	1062.66	0.760769	4.12156	0.494003	2.57372	0.701216	0.92434	0.372776	0.139735
	36.4642	621.348	0.594096	3.07733	0.533884	1.63738	0.639187	0.689195	0.475692	0.210439
	397.846	4980.69	2.80825	23.4971	2.15472	10.6821	2.53184	3.67736	0.339406	0.361452
	105.766	1548.07	1.83656	7.76759	1.44517	4.00636	1.72525	2.14676	0.424514	0.311267
	55.3981	1106.59	1.11748	4.65392	0.585542	3.59594	0.758739	1.24105	0.422307	0.246035
	421.182	6518.42	2.45731	28.0085	1.84465	12.4231	2.50407	3.88576	0.147035	0.194907
	136.521	2867.18	2.06698	10.0225	1.55295	5.59211	1.80793	2.45074	0.448924	0.324983
	191.436	1905.71	2.00135	10.2723	1.67228	3.92821	1.96654	2.33367	0.373925	0.273095
	119.726	1174.02	1.69679	6.39208	0.929479	3.03102	1.13193	1.9159	0.424255	0.250088
	#N/A	#N/A	#N/A	#N/A	#N/A	#N/A	#N/A	#N/A	#N/A	#N/A
MEAN	149.654	1985.04	1.49783	9.39166	1.08563	4.47942	1.39804	1.90038	0.278255	0.180522
MEDIAN	117.478	1562.82	1.39393	7.60887	0.952247	3.90901	1.2634	1.68951	0.256592	0.15909
IQR	74.704	809.963	0.682682	3.94937	0.53852	1.34726	0.673487	0.876232	0.201635	0.111933
TD	63.7953	896.693	1.74982	4.6343	1.5586	4.34118	1.93996	1.96573	0.481636	0.176176
	72.5849	805.349	2.30474	5.86796	1.74747	4.82552	2.24199	2.63667	0.393719	0.190888
	64.8367	966.394	1.54667	4.62306	1.01733	4.04598	1.49602	1.75998	0.181282	0.0988873
	163.53	1966.59	1.80873	9.15445	1.23545	4.8086	1.8061	2.38701	0.158729	0.102206
	73.7966	896.378	1.26266	5.18914	1.17574	5.00106	1.7261	1.53367	0.234412	0.0975226
	93.839	1531.02	1.31638	5.88898	1.02268	3.85291	1.45158	1.69465	0.176082	0.101245
	97.0416	1081.94	1.32856	5.43536	1.05243	4.04893	1.50138	1.65904	0.15665	0.0998962
	53.0807	851.283	0.663891	3.474	0.610978	2.3752	0.87482	0.860025	0.152115	0.0773999
	53.664	853.497	0.676722	3.39302	0.529117	2.4473	0.748682	0.815522	0.354095	0.128329
	46.6199	654.92	0.739898	3.01843	0.778799	3.13375	1.15157	0.929997	0.152215	0.067866
	74.9735	992.655	0.891216	4.49752	0.714147	3.26669	1.01263	1.16254	0.149775	0.0892894
	64.5713	1165.65	1.06454	4.61526	0.716458	2.52016	1.01421	1.23563	0.140267	0.0608488
	77.5224	1184.42	1.33542	5.25407	0.98821	3.74747	1.43419	1.64062	0.184002	0.111809
	61.2108	1067.55	1.1385	3.51979	1.06046	3.58986	1.46828	1.32416	0.352878	0.120376
	38.6434	615.413	1.07986	2.86422	1.15801	3.01573	1.43451	1.20691	0.509101	0.194193
	60.1365	713.993	1.01228	3.68337	0.998397	3.20402	1.34619	1.18386	0.425906	0.129307
	55.9656	794.058	1.17638	3.97862	1.02577	2.63288	1.2254	1.29228	0.548475	0.234856
	59.0914	853.868	0.886264	3.69385	0.963709	2.26121	1.1316	1.00666	0.499741	0.236227
	49.8326	614.368	0.871235	2.97176	0.881422	2.40361	1.10851	0.956517	0.564139	0.172857
	68.9797	1011.09	1.70962	4.73693	1.35336	3.72324	1.70608	1.85304	0.466846	0.182413
	#N/A	#N/A	#N/A	#N/A	#N/A	#N/A	#N/A	#N/A	#N/A	#N/A
MEAN	69.6858	975.856	1.22817	4.5247	1.02943	3.46227	1.39099	1.45523	0.314103	0.13363
MEDIAN	64.1833	896.536	1.15744	4.55639	1.02	3.42828	1.43435	1.30822	0.293645	0.116092
IQR	18.7006	268.622	0.498253	1.69703	0.306675	1.44202	0.426726	0.587411	0.312335	0.0791894
	#N/A	#N/A	#N/A	#N/A	#N/A	#N/A	#N/A	#N/A	#N/A	#N/A

## Sheet: RGV_UA
	MaxJerk	MaxAnfJerk	MeanAcc	MaxAcc	MeanGyr	MaxGyr	RMSGyr	RMSAcc	SE_Acc	SE_Gyr
DCP	228.536	2604.3	1.52225	14.1741	1.07825	7.25389	1.47985	2.07718	0.258479	0.161363
	102.397	2229.12	1.15175	7.30802	0.845852	3.94578	1.23685	1.60286	0.0958576	0.0716647
	86.7047	2517.21	1.14968	7.01717	0.956129	4.03101	1.30071	1.54524	0.13136	0.102554
	60.9684	1305.68	0.863535	4.16856	0.613406	3.97161	0.844487	0.976465	0.309688	0.121461
	252.527	3570.01	1.51395	14.6014	0.978113	5.78746	1.46543	2.33978	0.0829467	0.0593744
	99.3491	1307.59	0.777108	5.98743	0.529432	3.17292	0.764353	1.02504	0.134986	0.0868857
	155.791	1523.62	1.09017	9.69852	0.745259	3.94972	1.05558	1.41603	0.284287	0.149654
	187.539	1627.45	1.45295	10.8064	0.815354	4.42242	1.19372	1.83172	0.219741	0.112054
	139.018	2200.63	1.21299	8.47107	0.85088	5.1731	1.22016	1.55516	0.231632	0.115767
	140.868	1965.6	1.42505	8.21297	0.822252	3.49698	1.0876	1.64084	0.275643	0.144459
	137.295	1641.07	1.12143	8.00158	0.489357	3.73965	0.686978	1.3498	0.301575	0.200574
	128.184	1614.92	1.4179	8.01616	1.11808	4.32365	1.59109	1.78376	0.153538	0.0767948
	204.378	1715.06	1.40195	13.3566	1.0183	4.67328	1.52292	1.92658	0.119255	0.0586563
	72.1414	1155.36	0.724743	4.82424	0.487485	2.49372	0.682856	0.898999	0.303202	0.141114
	315.703	4699.47	2.24803	18.4642	1.59121	9.13554	1.89599	2.85212	0.386925	0.377596
	89.9293	1521.23	1.72939	6.39183	1.3348	3.83171	1.62061	1.9719	0.470948	0.2824
	163.032	2531.17	1.20432	9.76369	0.653495	6.0092	0.872717	1.38894	0.424118	0.218022
	367.037	6507.46	1.7436	23.5068	1.1833	11.7355	1.73993	2.70287	0.175154	0.159332
	160.299	3898.12	1.88277	10.7982	1.30257	6.89913	1.61143	2.29105	0.389873	0.255196
	126.321	1778.84	2.16217	8.83177	1.64692	4.19847	1.93716	2.51633	0.403171	0.296021
	133.406	1280.29	1.56011	8.49222	0.885615	3.57179	1.16249	1.76256	0.444944	0.175467
	#N/A	#N/A	#N/A	#N/A	#N/A	#N/A	#N/A	#N/A	#N/A	#N/A
MEAN	159.592	2342.58	1.3979	10.0425	0.949812	5.03888	1.28442	1.78358	0.266539	0.160305
MEDIAN	139.018	1778.84	1.4179	8.49222	0.885615	4.19847	1.23685	1.76256	0.275643	0.144459
IQR	85.1424	1007.55	0.410434	3.49842	0.372821	1.95575	0.535513	0.661141	0.233387	0.0980194
TD	51.5156	828.369	1.56429	4.30586	1.25784	3.63839	1.6675	1.82264	0.392289	0.139804
	55.4303	743.894	1.93537	5.00983	1.36343	3.866	1.78184	2.2196	0.389953	0.173058
	59.1334	1068.32	1.41865	4.42127	0.934046	3.6085	1.36931	1.61244	0.186531	0.0945146
	78.6309	1035.2	1.58835	6.97113	1.07703	4.24065	1.66055	2.12424	0.118314	0.0784699
	59.1345	781.282	1.07378	3.92877	0.933699	4.05974	1.37599	1.29012	0.203583	0.0952758
	98.7965	1301.26	1.05101	5.71168	0.823237	3.08648	1.1397	1.33803	0.227822	0.119127
	83.0136	1094.19	1.18132	4.97125	0.924919	3.80747	1.30227	1.45196	0.190083	0.10445
	66.6462	930.854	0.842432	4.17409	0.618705	2.63983	0.877407	0.981286	0.303648	0.107039
	67.7109	1598.37	0.692371	4.86102	0.529294	2.86815	0.742491	0.860091	0.356841	0.148808
	26.3565	412.713	0.660112	2.10947	0.636806	2.48498	0.927687	0.771364	0.257401	0.0864307
	70.3037	922.82	0.834235	4.12167	0.643353	2.72915	0.934661	1.10136	0.190951	0.0938584
	54.3709	957.813	0.998666	3.73572	0.628821	2.51104	0.929385	1.16116	0.164236	0.0694617
	76.3557	902.377	1.47545	5.01581	1.16242	3.26623	1.46075	1.68854	0.382607	0.221823
	63.8425	749.467	1.1534	4.09993	1.05396	3.511	1.41863	1.32566	0.428154	0.153023
	36.0237	374.848	0.85552	2.88252	0.876726	2.78533	1.12578	0.980551	0.444928	0.169974
	48.1394	517.512	0.970059	3.45522	0.849745	2.8847	1.17097	1.111	0.484082	0.137877
	68.1257	718.495	1.1951	4.05669	1.01844	3.1337	1.31926	1.3109	0.538648	0.155784
	82.5275	1001.66	0.915898	4.5809	0.915003	2.12801	1.06476	1.07573	0.440474	0.253309
	38.5695	575.439	0.874358	2.86649	0.829062	2.4761	1.09077	0.977854	0.52799	0.129634
	53.7554	771.117	1.63466	3.9284	1.36129	3.72772	1.74006	1.77649	0.520049	0.190193
	#N/A	#N/A	#N/A	#N/A	#N/A	#N/A	#N/A	#N/A	#N/A	#N/A
MEAN	61.9191	864.3	1.14575	4.26039	0.921892	3.17266	1.25499	1.34905	0.337429	0.136096
MEDIAN	61.4885	865.373	1.0624	4.14788	0.919961	3.11009	1.23662	1.30051	0.369724	0.133756
IQR	18.6212	272.501	0.563203	1.00835	0.281464	0.953902	0.39693	0.57935	0.241163	0.0642457
	#N/A	#N/A	#N/A	#N/A	#N/A	#N/A	#N/A	#N/A	#N/A	#N/A

## Sheet: RS_UA
	MaxJerk	MaxAnfJerk	MeanAcc	MaxAcc	MeanGyr	MaxGyr	RMSGyr	RMSAcc	SE_Acc	SE_Gyr
DCP	138.511	2066.42	1.44133	8.97414	0.961333	4.49056	1.26501	1.6816	0.334548	0.165987
	87.6073	2223.44	1.30361	6.84582	1.10243	5.2227	1.46302	1.70632	0.170056	0.138223
	152.213	3255.51	1.51239	9.98829	1.19924	5.75808	1.62805	2.01225	0.157648	0.120907
	100.224	957.543	0.924252	5.32827	0.5512	2.7106	0.765573	1.06907	0.360626	0.16222
	93.1904	2112.24	1.33077	6.16631	1.33802	4.86523	1.8609	1.64412	0.219096	0.0996431
	80.2636	1523.7	1.06945	8.73514	0.805749	3.84673	1.22112	1.47398	0.100972	0.0562595
	218.492	2187.56	2.17514	14.3391	1.40659	5.15529	1.96442	2.93737	0.192089	0.112248
	239.542	4007.21	1.70533	14.1531	1.13125	7.71295	1.5887	2.18326	0.242144	0.132318
	154.178	2823.61	1.82961	10.7698	1.15754	5.32837	1.54294	2.36043	0.258067	0.193511
	167.804	2158.15	1.37703	9.37956	1.00967	3.79172	1.32954	1.62594	0.238653	0.146023
	114.261	2027.88	1.19891	6.92882	0.676172	4.90944	0.94612	1.43511	0.277143	0.133567
	98.9551	1838.03	1.30739	7.82744	1.00631	4.55475	1.44344	1.62834	0.194548	0.0918186
	330.453	3546.25	2.07454	18.0556	1.47847	7.32035	2.14298	3.07558	0.129236	0.0773472
	81.3397	1628.39	1.14621	5.52006	0.604691	3.50881	0.852974	1.29495	0.405933	0.139849
	53.5596	1065.33	0.876025	4.27673	0.86296	2.65763	1.03552	1.02571	0.298694	0.193646
	364.713	5763.71	3.12772	23.7679	2.34823	10.6614	2.8012	4.10547	0.300682	0.351146
	140.962	1941.78	1.9217	8.83224	1.25834	3.68604	1.45186	2.22564	0.467947	0.439654
	89.4735	2293.76	1.63105	5.89011	1.05841	5.19304	1.33873	1.82175	0.484211	0.270369
	712.693	8287.08	2.56182	44.7321	1.72096	21.2281	2.56901	4.18132	0.137536	0.1412
	217.359	2922.01	2.11564	11.426	1.5975	5.54962	1.85776	2.5391	0.404482	0.318325
	150.811	2384.95	2.01795	9.89659	1.68997	4.52235	1.96828	2.4206	0.366722	0.317921
	91.2486	1710.47	1.8136	5.94254	1.09951	4.2059	1.43939	1.95689	0.516509	0.186938
	#N/A	#N/A	#N/A	#N/A	#N/A	#N/A	#N/A	#N/A	#N/A	#N/A
MEAN	176.266	2669.32	1.65734	11.2625	1.18475	5.76726	1.56711	2.10931	0.284434	0.181324
MEDIAN	139.737	2172.85	1.57172	8.90319	1.11684	4.88734	1.45744	1.88932	0.267605	0.143611
IQR	113.236	1033.44	0.689337	4.92576	0.416873	1.55779	0.578971	0.779015	0.172494	0.0698525
TD	76.6512	967.501	1.60784	4.34936	1.67776	5.35753	2.13852	1.75274	0.567965	0.183275
	63.795	757.495	1.60541	4.18246	1.6057	4.51216	2.02376	1.77473	0.518767	0.201981
	54.3827	1099.36	1.47361	4.84312	0.959506	3.94117	1.38907	1.6797	0.209523	0.113883
	118.76	2564	1.57027	7.53552	1.34177	6.17888	2.06647	2.13912	0.0904858	0.0682449
	86.2468	1224.36	1.36757	5.68335	1.01907	4.97112	1.50987	1.62494	0.23803	0.1104
	68.1761	1195.91	1.18588	4.25883	1.02587	4.27603	1.48602	1.45121	0.221849	0.0983509
	122.052	1460.75	1.41124	6.88972	1.12232	4.34746	1.56966	1.71182	0.230201	0.103878
	81.8346	1227.9	0.944531	5.23192	0.810754	3.77614	1.19431	1.21823	0.193926	0.097895
	68.1719	1237.63	1.07221	4.8144	0.754843	3.57029	1.11297	1.31067	0.230953	0.10655
	50.4212	759.69	0.93643	4.18219	0.925874	3.84691	1.34941	1.17302	0.127371	0.0753001
	90.2062	1017.39	1.13722	6.27747	1.03567	3.9441	1.46156	1.45671	0.194842	0.0750197
	63.2898	1242.54	1.18994	4.415	0.841019	3.99706	1.33116	1.39593	0.13001	0.0422212
	50.6986	1229.59	1.56898	4.64524	1.65722	4.01124	2.00966	1.7906	0.402487	0.234278
	48.4989	1000.18	1.32205	3.59821	1.32815	3.69717	1.7096	1.45754	0.517758	0.18119
	61.9974	854.321	1.25557	3.78973	1.31862	4.20244	1.76518	1.39394	0.472074	0.131
	70.5289	908.014	1.30141	4.02705	1.44167	4.27812	1.88781	1.44358	0.521828	0.166611
	49.1478	992.631	1.25738	3.66558	1.147	3.39633	1.43276	1.35218	0.539911	0.187459
	46.2539	712.708	1.16216	3.03063	1.26806	3.11901	1.51854	1.27116	0.546066	0.201521
	44.2634	908.007	1.0111	3.15188	0.956592	2.89273	1.24556	1.10769	0.524309	0.141705
	65.3652	1159.39	1.64954	4.44925	1.60898	4.49255	1.97894	1.8177	0.527593	0.247391
	#N/A	#N/A	#N/A	#N/A	#N/A	#N/A	#N/A	#N/A	#N/A	#N/A
MEAN	69.0371	1125.97	1.30152	4.65105	1.19232	4.14042	1.60904	1.51616	0.350297	0.138408
MEDIAN	64.5801	1058.38	1.2794	4.38218	1.13466	4.00415	1.5142	1.45396	0.320258	0.122441
IQR	27.3178	320.314	0.34153	0.972602	0.407966	0.627337	0.531433	0.380248	0.316595	0.0860842
	#N/A	#N/A	#N/A	#N/A	#N/A	#N/A	#N/A	#N/A	#N/A	#N/A
