# Supplementary material for: Reliability and Discriminative Validity of Wearable Sensors for the Quantification of Upper Limb Movement Disorders in Individuals with Dyskinetic Cerebral Palsy
Source: Sensors (Basel). 2023 Feb 1;23(3):1574. doi: 10.3390/s23031574 (PMC9921560; doi:10.3390/s23031574)
Supplement: Supplementary file 1 [file sensors-23-01574-s001.zip › readme.txt]

README file associated with the Supplementary material of the publication 
'Reliability and discriminative validity of wearable sensors for the quantification of upper limb movement disorders in individuals with dyskinetic cerebbral palsy'

The files 'sensor parameters' are the calculated parameters as described in the paper for each sensor (hand / wrist / upperarm) during three functional tasks (RF / RGV /RS)

sensor_parameters_TRT = test-retest reliability
MEAN_TD_DCP = the mean for the TD and DCP group which is used to compare the absolute difference of the TD and DCP group with the between-session measurement error.

In case of questions:
email: inti.vanmechelen@kuleuven.be
Twitter: @IntiVM
LinkedIn: Inti Vanmechelen
