# Supplementary material for: Reliability and Discriminative Validity of Wearable Sensors for the Quantification of Upper Limb Movement Disorders in Individuals with Dyskinetic Cerebral Palsy
Source: Sensors (Basel). 2023 Feb 1;23(3):1574. doi: 10.3390/s23031574 (PMC9921560; doi:10.3390/s23031574)
Supplement: Supplementary file 1 [file sensors-23-01574-s001.zip › sensor_parameters_long_hand_RF.xlsx]

## Sheet: MaxJerk
835.441	532.591			214.147
481.646	611.792	457.95		82.8319
682.867	592.243	708.914		61.2417
251.252	307.467			39.7495
538.595	737.81	705.499		106.917
700.472	450.544	888.472		219.692
479.518	524.905	457.382		34.4223
562.108	584.364	706.091		77.5066
588.458	313.994	334.801		152.81
697.572	892.237	624.072		138.57
345.395	220.098	288.095		62.7244
824.307	703.079			85.7209
726.915	867.59	841.735		74.8797
216.707	294.75			55.1849
105.782	197.33	89.5425		58.1133
569.179	468.181	534.045		51.2725
745.786	403.837	436.026		188.819
608.558	677.365	717.817		55.2392
410.829	32.7581			267.337
				126.409

## Sheet: MaxAnfJerk
21273.3	24202.2			2070.99
21445.1	18857.6	25383.5		3286.14
28805.3	19792.7	19543.6		5276.8
10392.2	7323.18			2170.14
31988.5	19954.8	30108.7		6473.6
21120.8	23804.7	18003.1		2903.51
24245	18575.9	17756.6		3533.36
19643.4	18196.8	24436.6		3266.08
24244.3	16311.3	14816.2		5067.2
12920.1	13351.6	10683.7		1432.07
13331.7	9185.65	22568.4		6850.86
37296.3	25437.8			8385.2
36019.1	29776.6	22391.1		6821.99
14917.4	9671.72			3709.23
5678.73	9878.14	9776.67		2395.77
13576.2	18463.7	42420.9		15437.3
25057.7	31996.9	26313.3		3697.59
33999.6	35633.6	35176.7		843.03
9647.13	1405.95			5827.39
				5706.84

## Sheet: MeanAcc
2.56101	2.64448			0.0590233
3.12242	2.97359	2.88923		0.118071
3.10617	3.54241	3.46951		0.233681
1.01153	1.00339			0.00575724
4.89721	5.75069	4.81714		0.517421
3.14205	2.90899	4.28584		0.736918
3.14506	3.47705	2.80179		0.337646
2.91926	3.64041	4.08667		0.589072
2.64037	2.43221	2.45805		0.113462
2.65795	2.28305	2.49151		0.187842
2.3817	2.03051	2.26402		0.178748
3.99272	3.78343			0.147991
4.27344	4.85519	4.65975		0.296049
1.45797	1.11031			0.245836
1.17013	1.14686	1.11621		0.0270439
3.94901	4.34137	4.00692		0.211804
4.33288	4.23132	4.42355		0.0961646
4.23705	4.92385	5.46906		0.617361
2.48336	0.470636			1.42321
				0.462

## Sheet: MaxAcc
30.3753	21.4357			6.32123
22.821	24.3804	20.8425		1.77308
25.7767	22.6596	28.3833		2.86564
9.87704	12.215			1.65317
24.6627	31.3654	31.1962		3.82186
28.7479	20.8206	37.3101		8.24679
23.3267	25.3243	20.1409		2.61431
29.7122	26.8935	30.6123		1.94014
21.0692	14.5812	16.0954		3.39428
25.753	31.2505	22.5214		4.41331
14.5212	11.0681	12.2926		1.75073
32.0551	28.1091			2.79023
29.4497	33.3885	33.8158		2.40693
12.3279	12.7119			0.271484
7.03977	7.68743	5.15262		1.31695
18.9087	21.769	22.7316		1.98836
29.1175	17.0684	19.59		6.35497
25.0044	28.4785	28.9907		2.1688
17.2645	1.51114			11.1393
				4.41194

## Sheet: MeanGyr
2.21267	2.0508			0.114458
2.24398	2.11907	2.10697		0.0758488
1.92389	2.00967	2.02441		0.0542807
0.793082	0.787138			0.00420282
2.2475	2.52913	2.21937		0.1713
1.45316	1.43374	1.85124		0.235641
1.85924	2.00987	1.76523		0.123408
1.38154	1.833	2.24227		0.43054
1.80009	1.70098	1.76005		0.0498613
1.19045	1.179	1.4039		0.126671
1.03897	1.0309	1.23416		0.115093
1.99436	2.01681			0.0158802
2.68192	2.39878	2.43632		0.153787
0.971414	0.717028			0.179878
0.875615	0.886832	0.802935		0.0455464
2.31169	2.42153	2.30625		0.0650432
1.90828	2.17597	2.25538		0.181865
2.18753	2.69615	2.67794		0.288539
1.27179	0.296642			0.689536
				0.228659

## Sheet: MaxGyr
11.2054	12.1237			0.649321
8.80664	8.00259	7.24124		0.782797
8.33679	7.36031	7.25009		0.598133
4.10708	3.70601			0.283601
8.682	6.32443	7.42375		1.17968
4.47993	4.59765	6.15042		0.932332
11.1188	8.98821	8.88154		1.26204
7.22161	7.70237	9.27972		1.07665
7.18315	9.01691	8.74613		0.989854
4.17019	4.91001	4.47323		0.371922
5.36942	4.63746	5.77584		0.576893
7.71701	7.89711			0.127355
12.3751	10.8566	12.445		0.897603
5.46274	4.10518			0.959942
5.90902	4.57857	3.57589		1.1704
7.92332	9.24156	8.22545		0.690595
6.41999	8.23966	10.1238		1.85202
8.55889	9.47733	10.0904		0.770825
5.06296	1.10065			2.80178
				1.10978

## Sheet: RMSGyr
2.93554	2.98513			0.0350663
2.5535	2.50902	2.51792		0.0235336
2.2762	2.29334	2.35121		0.0393043
0.967977	0.953956			0.009914
2.60165	2.87698	2.64328		0.148414
1.72476	1.67341	2.18375		0.280997
2.31471	2.54847	2.29849		0.13988
1.89436	2.26515	2.75495		0.431669
2.28713	2.2154	2.25836		0.0360979
1.39328	1.42246	1.67418		0.154444
1.22661	1.23614	1.45947		0.131777
2.32862	2.43476			0.0750512
3.23658	2.94858	3.04843		0.14624
1.37856	1.0429			0.237349
1.11048	1.14955	0.982424		0.0874237
2.78141	2.90093	2.84357		0.0597749
2.30148	2.61588	2.77015		0.238848
2.56741	3.08349	3.09941		0.30266
1.57857	0.342602			0.87396
				0.267529

## Sheet: RMSAcc
3.69971	3.95			0.17698
3.858	4.04856	3.86165		0.108984
4.12502	4.57525	4.57413		0.259617
1.45261	1.51635			0.0450753
5.87769	6.95321	6.16907		0.556255
4.59965	3.84472	5.90779		1.04382
4.07589	4.62763	3.74514		0.445836
4.32582	4.82549	5.43834		0.557223
3.57687	3.22365	3.20637		0.209097
3.84667	3.53719	3.31683		0.266167
2.88226	2.54438	2.73129		0.169257
5.63911	5.49813			0.0996848
6.20773	6.84621	6.73193		0.340463
2.04209	1.63079			0.290837
1.46182	1.46025	1.35143		0.0632887
4.92862	5.33094	5.06966		0.204131
5.51806	5.09519	5.58604		0.265947
5.24958	5.92124	6.51109		0.631198
3.32727	0.529954			1.978
				0.598324

## Sheet: SE_Acc
0.22941	0.103375			0.0891202
0.425158	0.326806	0.332293		0.0552676
0.27519	0.28749	0.305411		0.0151975
0.299783	0.230218			0.0491896
0.375893	0.345935	0.322181		0.0269157
0.24744	0.266766	0.291596		0.0221352
0.330705	0.286016	0.26276		0.0345315
0.162203	0.295563	0.312381		0.0822815
0.332026	0.340431	0.365566		0.0174513
0.253747	0.227579	0.302133		0.0378246
0.575781	0.485524	0.547313		0.0461422
0.260437	0.256387			0.00286357
0.260705	0.26285	0.256539		0.00320928
0.252052	0.217583			0.0243739
0.331196	0.322601	0.381688		0.0319236
0.398521	0.438099	0.400973		0.0221767
0.325756	0.374191	0.305231		0.0354089
0.230368	0.27725	0.235595		0.0256918
0.296664	0.614714			0.224896
				0.0654154

## Sheet: SE_Gyr
0.233993	0.106816			0.0899278
0.54202	0.414446	0.384114		0.0837948
0.444577	0.509369	0.510489		0.0377351
0.333677	0.307609			0.0184335
0.575718	0.571551	0.423241		0.0868548
0.44862	0.457183	0.492036		0.0229962
0.352743	0.320955	0.297035		0.0279463
0.207384	0.351658	0.393516		0.0976494
0.312279	0.270896	0.294949		0.0207824
0.4149	0.349217	0.379908		0.0328653
0.540159	0.52505	0.496351		0.0222525
0.519788	0.422572			0.068742
0.400156	0.408628	0.364332		0.0235134
0.168307	0.158058			0.00724678
0.259158	0.246442	0.302163		0.0292007
0.388708	0.469609	0.414791		0.0412923
0.354809	0.321895	0.316219		0.020836
0.390721	0.389361	0.322684		0.0388945
0.316955	0.376869			0.0423657
				0.0507309

[truncated: 6 more sheets: CORR_AXY, CORR_AXZ, CORR_AYZ, CORR_GXY, CORR_GXZ, CORR_GYZ]
