# Supplementary material for: Reliability and Discriminative Validity of Wearable Sensors for the Quantification of Upper Limb Movement Disorders in Individuals with Dyskinetic Cerebral Palsy
Source: Sensors (Basel). 2023 Feb 1;23(3):1574. doi: 10.3390/s23031574 (PMC9921560; doi:10.3390/s23031574)
Supplement: Supplementary file 1 [file sensors-23-01574-s001.zip › sensor_parameters_long_hand_RGV.xlsx]

## Sheet: MaxJerk
1308.9	1298.34			7.46764
746.008	734.627	749.294		7.69706
684.81	773.757	779.207		52.9969
334.663	319.813			10.5002
815.895	916.87	1019.52		101.813
428.75	546.271	79.6686		242.689
374.035	430.806	414.071		29.1714
616.618	411.18	686.352		143.055
285.65	259.979	492.747		127.625
796.925	1118.78	811.491		181.765
330.486	314.645	308.747		11.2422
563.507	346.472	609.281		140.397
564.097	574.406	708.356		80.4775
162.902	322.399	246.727		79.7833
608.376	380.97	729.089		176.763
858.004	397.897	686.37		232.513
904.804	826.315	778.511		63.7646
35.0803	39.2857	29.062		5.13859
				121.34

## Sheet: MaxAnfJerk
52569.9	72183.8			13869.1
23130.5	20651.4	19005.2		2076.62
28556.3	34626.5	29479.7		3270.87
8013.24	7000.92			715.818
20201.6	14802.2	19079.6		2849.23
8246.75	14347	5954.88		4337.7
18894.6	25853.9	19476.2		3861.02
22982.7	13318.9	15103.9		5142.19
14621.7	21072.8	23750.4		4692.52
12563.4	23771.5	32739.7		10108.8
10490.4	9298.83	8583.13		963.467
33395.8	28577.1	39714.1		5585.3
31087.2	54312.8	25540.5		15264.5
12973	7890.58	10912.5		2556.3
20494.7	24697	12920.9		5967.93
22887.2	23747.6	16174.2		4146.51
42711	39664	37295		2715.07
1150.53	931.135	567.169		294.649
				6378.35

## Sheet: MeanAcc
2.3573	3.25274			0.633174
1.57435	2.60138	2.88752		0.690542
3.0317	3.50237	3.09931		0.254479
1.12248	1.14185			0.0136964
3.10735	3.74924	4.00867		0.463989
2.55808	2.62233	0.307534		1.31829
2.13011	2.44182	2.54311		0.215248
2.93417	1.83874	3.23482		0.734782
2.47619	2.50655	2.19794		0.170091
2.4451	2.44015	2.41567		0.0157572
1.74718	1.46194	1.98577		0.262262
3.0049	2.50006	3.24603		0.380672
2.64933	1.68026	3.38143		0.853334
1.16836	1.03298	1.34815		0.158104
3.23761	3.51475	3.52276		0.162367
3.83294	3.20362	3.58556		0.31705
5.00138	5.563	5.94394		0.474157
0.466747	0.449075	0.432678		0.0170385
				0.518018

## Sheet: MaxAcc
49.33	47.4228			1.34854
27.2732	27.7078	27.5335		0.218744
27.2545	31.8525	29.4755		2.29942
12.925	13.1558			0.16322
33.59	37.3498	41.6026		4.0088
19.0861	23.8336	4.6711		9.97944
18.8744	23.3561	16.8612		3.32471
22.8449	19.5645	27.7743		4.13241
12.4	14.2441	20.4235		4.20246
31.5323	37.403	30.5273		3.71375
10.5197	13.8914	13.484		1.84033
21.168	12.9132	24.9069		6.13693
19.5277	21.6903	25.9198		3.25128
10.2097	13.2894	12.8714		1.67054
30.2022	17.0055	27.7205		7.01336
41.2382	23.2004	28.1832		9.3151
34.1185	30.6292	30.1537		2.16491
2.04452	1.75721	1.7434		0.170005
				4.57959

## Sheet: MeanGyr
1.82774	2.79127			0.681317
1.13378	1.90087	2.02197		0.481664
1.96467	2.0605	1.97063		0.0536913
0.974047	0.986569			0.00885452
1.36251	1.56452	1.56741		0.117475
1.57769	1.68462	0.30336		0.768468
1.63669	1.67025	1.75567		0.0613476
1.62574	1.07429	1.76767		0.36629
1.64976	1.78975	1.56525		0.113389
1.34109	1.36573	1.50673		0.0893731
0.874163	0.726287	1.06681		0.170749
2.42428	2.26557	2.17732		0.125143
1.94905	1.17702	2.17291		0.522482
0.933739	0.795463	1.05675		0.13072
2.03468	2.24113	2.10257		0.105222
2.01058	1.86336	1.88935		0.0785766
2.78035	2.99197	3.22553		0.222682
0.254962	0.234749	0.234327		0.0117938
				0.321812

## Sheet: MaxGyr
15.6065	14.4961			0.785213
9.85219	9.16783	10.4254		0.629616
11.2141	7.963	10.7811		1.76537
4.17191	3.93439			0.167948
6.24269	7.43449	7.4044		0.679566
4.11694	5.54371	6.47971		1.18985
7.18018	7.5967	7.00929		0.302145
9.24271	10.201	9.28983		0.540207
8.62933	9.96415	8.30804		0.878225
5.53767	7.82392	11.5726		3.04687
4.32621	6.34536	5.66291		1.02709
8.27513	9.29596	10.544		1.13635
8.25353	9.78974	7.82998		1.03118
6.15657	5.6176	6.20752		0.326878
10.0419	7.71366	6.97323		1.60133
11.5396	10.3955	10.6521		0.600314
10.5902	10.0848	10.4939		0.268318
0.889023	0.747482	0.939756		0.0996469
				1.13029

## Sheet: RMSGyr
2.9008	3.74821			0.599214
1.86242	2.55223	2.71075		0.45104
2.53713	2.55973	2.54508		0.0114633
1.19647	1.22933			0.0232365
1.74108	1.96732	2.07513		0.170488
1.85088	1.99733	0.773966		0.668056
2.14086	2.2526	2.30573		0.0841519
2.12249	1.80907	2.45316		0.322082
2.15018	2.40273	2.10898		0.159044
1.65336	1.7392	1.97513		0.166614
1.07012	1.02003	1.29238		0.144963
2.89688	2.65828	2.78357		0.11935
2.41814	1.91696	2.73096		0.41062
1.37277	1.21218	1.54837		0.168148
2.53174	2.78365	2.60699		0.129315
2.55925	2.33077	2.37545		0.121095
3.39978	3.55804	3.82355		0.214132
0.30364	0.26676	0.271386		0.0200912
				0.289845

## Sheet: RMSAcc
4.48634	5.40346			0.648502
2.80419	3.87125	4.26927		0.757571
4.26905	5.02719	4.51206		0.387121
1.57673	1.5727			0.00284974
4.86465	5.76419	6.80748		0.972304
3.40727	3.6874	0.588664		1.71392
2.9862	3.40806	3.38293		0.236637
3.94893	3.0966	4.43514		0.677564
3.13545	3.25862	3.00838		0.125127
3.57852	3.79732	3.91555		0.170999
2.16762	2.04938	2.48623		0.225957
4.03117	3.14191	4.62347		0.745721
3.66548	3.11432	4.64967		0.777784
1.71299	1.6583	2.04167		0.207361
4.36801	4.36337	4.63436		0.155129
5.40376	4.27195	4.94337		0.569173
6.22906	6.78878	7.1119		0.446675
0.525031	0.498252	0.479729		0.0227764
				0.640763

## Sheet: SE_Acc
0.101517	0.197047			0.0675496
0.0710859	0.270278	0.297088		0.123473
0.294569	0.2788	0.278202		0.0092815
0.312744	0.305113			0.00539606
0.243514	0.292598	0.229397		0.0331735
0.387863	0.323181	0.0626085		0.172178
0.242504	0.264376	0.33268		0.0470382
0.295823	0.073327	0.261653		0.119819
0.407214	0.388304	0.270103		0.0743065
0.262525	0.269066	0.234375		0.0184333
0.61483	0.342258	0.619894		0.158852
0.391918	0.386271	0.249588		0.0805932
0.296534	0.0648394	0.299704		0.134693
0.228463	0.14486	0.177893		0.0421068
0.359012	0.431916	0.358064		0.0423672
0.245378	0.248403	0.269459		0.0131172
0.357574	0.338359	0.355222		0.0104812
0.635269	0.643433	0.660685		0.0129759
				0.0839939

## Sheet: SE_Gyr
0.0936519	0.262193			0.119176
0.0551868	0.231124	0.256191		0.109533
0.322035	0.382832	0.30729		0.040042
0.308607	0.263555			0.0318566
0.29569	0.360842	0.252039		0.0547545
0.42518	0.379012	0.0245926		0.219171
0.229092	0.224676	0.262065		0.0204313
0.262961	0.0632872	0.198153		0.101865
0.324242	0.281766	0.23032		0.0470321
0.330892	0.327843	0.254798		0.0430795
0.508208	0.291778	0.550555		0.138805
0.425613	0.462879	0.255877		0.110339
0.325344	0.0505063	0.364989		0.171273
0.131572	0.108989	0.138656		0.0154935
0.32666	0.339848	0.285066		0.0285924
0.311356	0.342093	0.352521		0.0214011
0.341777	0.438837	0.442228		0.0570418
0.309164	0.433339	0.408001		0.0656125
				0.0956163

[truncated: 6 more sheets: CORR_AXY, CORR_AXZ, CORR_AYZ, CORR_GXY, CORR_GXZ, CORR_GYZ]
