# Supplementary material for: Reliability and Discriminative Validity of Wearable Sensors for the Quantification of Upper Limb Movement Disorders in Individuals with Dyskinetic Cerebral Palsy
Source: Sensors (Basel). 2023 Feb 1;23(3):1574. doi: 10.3390/s23031574 (PMC9921560; doi:10.3390/s23031574)
Supplement: Supplementary file 1 [file sensors-23-01574-s001.zip › sensor_parameters_long_hand_RS.xlsx]

## Sheet: MaxJerk
657.568	718.37			42.9938
389.79	382.416	512.026		72.7951
487.559	655.144	610.058		86.7216
380.506	339.059			29.3072
453.76	492.053	343.088		77.3578
494.669	512.104	389.162		66.5207
510.302	692.902			129.118
566.857	753.597	613.863		97.1312
473.57	583.725			77.8916
594.561	653.274	670.511		39.8177
330.793	288.155	311.93		21.366
566.415	493.929			51.2557
711.292	650.589	796.535		73.3161
240.049	206.847	172.036		34.0096
267.449	487.446	423.052		113.105
530.9	463.823	450.115		43.231
560.079	903.719	667.491		175.798
781.178	937.941	493.994		225.144
41.0919	40.2762			0.576798
				93.3491

## Sheet: MaxAnfJerk
19487.1	16682.5			1983.16
20236.7	27414.6	29482.7		4852.64
45495.3	24203.9	38167.6		10816.7
12183.8	7955.21			2990.1
21668.2	26658.4	24932.8		2534.33
18105.1	15223.9	14140.9		2048.94
19029.5	33287.3			10081.8
27069.6	30892	23126		3883.14
16025	19555.6			2496.53
12092.4	21819.1	11209.3		5887.18
11010.1	13218.9	26536.1		8399.22
38035.1	29178.8			6262.34
23254.5	32669.4	26296.8		4804.64
10568.7	11852.1	8686.77		1592.06
8353.27	6807.32	15295.6		4520.98
30233	22809.3	15694.4		7269.81
32015.7	33729.4	25368.1		4416.6
34989.6	41033.7	27987.3		6529.06
837.909	664.594			122.552
				5584.18

## Sheet: MeanAcc
1.96449	2.60162			0.450517
3.46519	3.61796	3.86902		0.203899
4.49224	4.12831	4.23392		0.187228
1.56763	1.81691			0.17627
4.02283	5.14746	4.73247		0.568712
3.67037	3.15772	2.64549		0.51244
5.90693	8.14016			1.57914
2.69104	3.41794	3.42831		0.422702
3.63867	3.55507			0.0591118
2.65743	2.95037	2.68315		0.162211
1.55981	2.11493	2.12528		0.323527
3.42699	3.58373			0.110827
4.70738	5.54609	5.09043		0.419878
1.12778	1.24784	1.46184		0.169217
1.49495	1.84462	2.1422		0.323975
4.21602	4.29872	4.25757		0.0413523
4.26653	5.25561	4.2152		0.586426
4.68334	5.76892	3.93917		0.92017
0.632274	0.59036			0.0296377
				0.524098

## Sheet: MaxAcc
23.3915	27.8503			3.15286
19.7441	18.5724	21.4907		1.46854
25.1682	30.3653	25.064		3.03109
16.2325	14.9346			0.917766
22.8263	26.8131	22.1521		2.51906
27.817	26.9172	20.3435		4.07996
28.2302	36.044			5.52522
36.9284	39.9714	35.5249		2.27308
17.7834	21.9107			2.91843
26.8289	27.4409	26.2713		0.585011
14.7624	12.5249	12.9916		1.18041
25.2918	22.2844			2.12657
34.0438	30.4369	40.4482		5.07036
11.3128	11.2935	11.5468		0.14103
10.4864	15.6498	14.8379		2.77657
23.7009	22.7393	20.0226		1.90767
26.4224	39.9612	27.1701		7.60999
32.6174	37.3158	20.863		8.4748
1.76708	2.19299			0.301162
				3.71689

## Sheet: MeanGyr
1.85093	2.29771			0.315921
2.46687	2.5219	2.69834		0.120923
2.76793	2.58475	2.61016		0.099242
1.37641	1.57398			0.139703
2.17405	2.63001	2.40676		0.227997
2.04534	1.73573	1.37648		0.334734
2.55109	3.26776			0.50676
1.50363	2.17651	2.29496		0.426807
2.38778	2.3353			0.037111
1.83417	1.89496	1.76182		0.0666556
1.11071	1.32825	1.31515		0.121992
2.49095	2.57099			0.0565981
2.84276	3.36537	3.14124		0.262185
0.746993	0.885864	0.952975		0.105054
1.35049	1.58595	1.61103		0.143729
2.79511	2.7431	2.80375		0.032808
2.50925	2.69739	2.43701		0.13442
2.70979	3.32355	2.41185		0.464881
0.416188	0.420126			0.00278432
				0.241312

## Sheet: MaxGyr
12.4863	13.8087			0.935049
10.9457	12.3656	10.5337		0.961051
9.16769	7.40249	12.8087		2.75681
5.28186	5.02619			0.180782
5.92651	6.75055	7.14637		0.622331
4.7202	5.33548	5.70659		0.498209
6.63987	7.74455			0.781126
9.57133	11.7429	10.728		1.08657
10.6559	11.8364			0.834763
5.49954	5.8232	5.25638		0.28436
6.94964	7.97827	7.03309		0.571314
7.54321	6.95302			0.417326
10.632	14.7118	12.4089		2.04555
3.42731	5.20615	4.74017		0.922408
6.63789	6.13025	5.02355		0.825486
9.34079	9.37552	8.30603		0.60769
7.42706	7.74757	8.09197		0.332523
12.1335	12.5825	7.48776		2.82077
1.68552	1.79059			0.0742923
				1.19855

## Sheet: RMSGyr
2.50712	2.73695			0.162517
2.972	3.02166	3.17537		0.106028
3.0594	2.9132	2.92777		0.0805311
1.71096	1.92689			0.15269
2.52632	2.97697	2.76756		0.225514
2.26812	2.168	1.90086		0.189854
3.06986	3.67646			0.42893
2.10047	2.90166	3.04993		0.510778
3.10174	3.09185			0.00699866
2.1417	2.16164	2.11582		0.0229704
1.36452	1.60751	1.57329		0.13153
2.94374	2.82682			0.0826713
3.37154	3.93892	3.72815		0.286794
1.03424	1.19936	1.30208		0.135125
1.612	1.84425	1.85332		0.136785
3.43765	3.41171	3.3926		0.0226097
2.81362	3.05234	2.82102		0.135738
3.40717	3.75364	2.80213		0.481576
0.533755	0.53351			0.000172868
				0.228728

## Sheet: RMSAcc
2.80313	3.4832			0.48088
4.25541	4.42056	4.86696		0.316373
5.50121	5.24808	5.16796		0.173952
2.17373	2.46693			0.207322
4.87017	6.14022	5.57291		0.636228
4.56867	4.25775	3.8848		0.342402
7.30849	9.59874			1.61945
4.33055	5.1392	5.05149		0.443729
4.80521	4.80586			0.00046281
3.62282	4.03433	3.86858		0.207047
2.02217	2.59445	2.6475		0.346735
4.54578	4.66321			0.0830348
6.53802	7.1566	7.14366		0.353465
1.64979	1.77204	2.09731		0.231308
1.80964	2.24392	2.64756		0.419052
5.20658	5.34452	5.01555		0.165196
5.05892	6.64955	5.0871		0.910329
6.61844	7.29598	4.76018		1.31291
0.682209	0.647983			0.0242013
				0.600459

## Sheet: SE_Acc
0.196292	0.297329			0.0714437
0.345951	0.347232	0.321548		0.0144728
0.329081	0.294697	0.312643		0.0171976
0.278712	0.290438			0.00829131
0.277647	0.249493	0.275458		0.0156609
0.182226	0.148382	0.0624718		0.0617346
0.270411	0.296559			0.0184899
0.129568	0.190219	0.18664		0.034031
0.348199	0.268978			0.0560181
0.238871	0.224276	0.184285		0.0282607
0.441692	0.607399	0.499931		0.0840636
0.29028	0.280562			0.00687143
0.270566	0.342026	0.236624		0.0538024
0.216722	0.231042	0.181968		0.0252363
0.315725	0.303573	0.258014		0.0304243
0.428864	0.410921	0.53358		0.0662481
0.347356	0.283102	0.351517		0.0383551
0.198146	0.32492	0.413762		0.108363
0.669585	0.66566			0.00277487
				0.048315

## Sheet: SE_Gyr
0.181779	0.346811			0.116695
0.401325	0.396124	0.426781		0.0164057
0.546326	0.458793	0.476348		0.0463091
0.232494	0.245611			0.00927528
0.340662	0.42127	0.390994		0.0407177
0.284952	0.19377	0.0749989		0.105278
0.309983	0.398053			0.062275
0.153486	0.218578	0.201198		0.0337032
0.252091	0.213219			0.0274866
0.30325	0.332479	0.252984		0.0402088
0.411469	0.507408	0.463201		0.0480186
0.316498	0.452775			0.0963625
0.317684	0.435093	0.347849		0.0609731
0.173617	0.198219	0.144815		0.0267291
0.279406	0.296329	0.300036		0.0109978
0.349295	0.336734	0.388095		0.0267741
0.373051	0.358409	0.327325		0.0233507
0.209282	0.44673	0.481759		0.148241
0.192466	0.208932			0.0116432
				0.0631468

[truncated: 6 more sheets: CORR_AXY, CORR_AXZ, CORR_AYZ, CORR_GXY, CORR_GXZ, CORR_GYZ]
