# Supplementary material for: Reliability and Discriminative Validity of Wearable Sensors for the Quantification of Upper Limb Movement Disorders in Individuals with Dyskinetic Cerebral Palsy
Source: Sensors (Basel). 2023 Feb 1;23(3):1574. doi: 10.3390/s23031574 (PMC9921560; doi:10.3390/s23031574)
Supplement: Supplementary file 1 [file sensors-23-01574-s001.zip › sensor_parameters_long_upperarm_RF.xlsx]

## Sheet: MaxJerk
212.268	147.869			45.5372
123.104	78.399	113.775		23.5832
180.615	162.124	141.271		19.6839
68.7823	77.3312			6.04499
144.599	127.507	226.891		53.137
106.829	93.3039	89.478		9.11628
164.092	172.243	152.911		9.70527
170.897	196.894	205.065		17.8422
235.787	244.507	282.174		24.6528
183.045	227.737	174.669		28.5302
146.905	181.868	91.2028		45.726
293.358	272.027			15.0835
226.946	336.802	345.068		65.9412
75.4002	76.9395			1.08842
57.1371	56.3079	44.1057		7.29613
854.294	224.98	193.691		372.695
196.347	162.735	115.1		40.8242
70.8568	76.2342			3.80235
780.635	327.499	405.375		242.287
249.101	189.622	177.599		38.2854
121.755	395.203	174.94		144.982
127.123	60.2431			47.2911
				104.125

## Sheet: MaxAnfJerk
5674.04	5549.65			87.9594
6106.12	11250.1	8067.39		2596.06
10307.5	6891.2	8835.99		1713.62
3295.44	5258.24			1387.9
10059.9	4991.56	5239.34		2857.39
4142.81	3948.11	12479.3		4870.28
5589.69	6964.47	5731.52		756.118
11425.3	10642.3	15014.3		2331.22
21313.2	10561	27443.9		8546.24
13296.7	13302.7	9702.32		2076.96
7121.98	5631.97	6255.44		748.299
12866.4	14425.9			1102.75
21942.3	19922.8	34527.4		7913.69
3800.64	3148.08			461.434
2273.99	3138.71	1959.36		610.679
69583.9	28499.5	18993.9		26887.5
12155.8	10522.3	11784.6		856.32
7749.27	5147.19			1839.95
88769.1	48940.8	53193.6		21870.8
25185	18717.8	24619.4		3581.75
18271.8	10166.4	10546.7		4573.83
6632.99	1189.18			3849.35
				8106.67

## Sheet: MeanAcc
1.43623	1.48164			0.0321095
1.41728	1.34922	1.41615		0.0389689
1.40707	1.53946	1.53785		0.075973
0.874719	0.892738			0.0127413
2.40059	2.65059	2.32336		0.171051
1.29798	1.21116	1.74218		0.28485
1.50842	1.68798	1.39384		0.148259
1.82217	2.07937	2.04327		0.139249
1.53613	1.42722	1.47219		0.05473
1.57568	1.57109	1.59181		0.0108862
1.42479	1.26502	1.23015		0.103785
1.71032	1.66743			0.0303324
2.18636	2.52638	2.35256		0.170022
0.811774	0.705343			0.0752582
0.600461	0.563507	0.620384		0.0288606
3.56357	2.26965	2.06697		0.811902
1.82451	1.81521	1.78507		0.0206179
1.13756	1.03832			0.0701738
2.60131	1.98323	1.95079		0.366572
2.13323	1.94922	2.08708		0.0957386
1.8851	1.98926	2.11173		0.113439
1.5582	0.94214			0.435622
				0.235601

## Sheet: MaxAcc
8.71578	7.42155			0.915163
6.68496	5.51665	6.31732		0.59738
7.34687	6.24305	6.32185		0.615801
3.47439	3.54989			0.0533912
7.22291	7.19637	8.72362		0.874201
5.70257	5.68973	5.16374		0.307456
6.28512	7.95151	8.13113		1.01791
10.8967	10.1061	12.0848		0.995983
11.4762	8.20885	11.2139		1.81543
8.33154	10.8863	8.14804		1.53073
7.08374	9.26511	4.93612		2.16452
8.06749	8.22245			0.10957
8.66315	11.6777	10.719		1.5402
4.11731	3.54784			0.402678
3.55864	3.12594	2.70163		0.428513
30.3213	11.0009	10.437		11.321
9.93109	7.23328	7.08027		1.60358
3.99194	5.27804			0.909414
28.7101	16.8237	16.2607		7.03078
11.8691	9.45506	8.45828		1.75377
6.32516	15.6257	8.35206		4.8907
5.35609	2.49277			2.02467
				3.23058

## Sheet: MeanGyr
1.02785	0.897287			0.0923197
1.25661	1.22409	1.24223		0.0162943
1.26895	1.35349	1.32085		0.042638
0.702709	0.682484			0.0143007
1.88211	1.93492	1.77651		0.0806558
1.17878	1.18014	1.40513		0.130294
1.19953	1.2623	1.04483		0.111927
0.999856	1.32936	1.42701		0.223818
1.18732	1.17809	1.22911		0.027185
1.0974	0.981687	1.14818		0.0853325
0.859696	0.754442	0.830594		0.0543515
1.70542	1.66368			0.0295203
2.11903	2.3395	2.21625		0.110492
0.5469	0.478196			0.0485808
0.557447	0.54515	0.536696		0.0104349
2.70358	1.89077	1.7358		0.519816
1.51758	1.55667	1.42851		0.0656847
0.639712	0.507988			0.0931431
1.9202	1.57587	1.55414		0.20536
1.58598	1.53903	1.59464		0.0299218
1.61332	1.70383	1.78015		0.0835157
0.840588	0.3834			0.323281
				0.159714

## Sheet: MaxGyr
4.43477	3.30248			0.800651
3.60174	3.23598	3.20163		0.221755
4.10255	2.91244	3.95712		0.649212
3.45971	2.66719			0.560396
4.23912	4.34002	5.13389		0.490069
2.63255	3.03933	3.46956		0.418563
4.00806	3.97412	4.49839		0.293381
4.52655	4.5412	5.02552		0.283946
4.75298	3.25025	5.41651		1.10989
2.57018	3.61936	2.52366		0.619609
3.22666	3.74212	3.07228		0.350762
3.83194	4.16567			0.235983
5.12747	5.92802	6.37116		0.630351
2.63695	2.62629			0.00754172
1.79206	1.71231	1.48093		0.161607
14.37	8.82056	6.40606		4.08349
3.81284	4.48981	3.92939		0.361929
3.52246	3.65698			0.0951199
15.0232	9.76982	10.0924		2.94432
6.32218	5.1796	5.2634		0.636855
3.91857	4.24236	4.09638		0.162157
2.58012	1.26056			0.933065
				1.18729

## Sheet: RMSGyr
1.27568	1.19695			0.0556705
1.43472	1.45122	1.45939		0.0125663
1.42196	1.48986	1.50968		0.0460031
0.914758	0.860279			0.038522
2.1408	2.1955	2.10405		0.0460196
1.34032	1.33399	1.58181		0.141287
1.52402	1.58825	1.33529		0.131485
1.38204	1.63979	1.71453		0.174436
1.43684	1.4375	1.50446		0.0388505
1.21808	1.15174	1.28653		0.067402
1.02437	0.949626	0.987832		0.0373741
1.91408	1.91512			0.000733829
2.31801	2.60568	2.55098		0.152764
0.770247	0.674325			0.067827
0.673658	0.649094	0.637035		0.018664
3.0792	2.19538	1.98258		0.581519
1.75627	1.78534	1.70265		0.0419456
0.823592	0.677206			0.10351
2.73952	2.18827	2.04452		0.366871
1.85163	1.78015	1.87312		0.0486703
1.91033	1.99194	2.08084		0.0852794
1.05113	0.432969			0.437103
				0.190492

## Sheet: RMSAcc
1.75707	1.86493			0.0762714
1.64588	1.58659	1.70699		0.0602008
1.71538	1.83041	1.86457		0.0781627
0.959373	0.977927			0.0131203
2.66648	2.93944	2.6926		0.15062
1.51541	1.37573	1.93386		0.29044
1.74391	2.02176	1.68466		0.179971
2.20974	2.47485	2.46973		0.151604
1.89196	1.69718	1.7966		0.0973977
1.88556	1.86834	1.81219		0.0383648
1.69791	1.5749	1.43959		0.129206
1.96699	1.91079			0.0397423
2.52666	3.16329	2.90081		0.319944
1.00344	0.854197			0.105532
0.717489	0.684174	0.699748		0.0166695
4.54795	2.70725	2.61644		1.08989
2.14315	2.11416	2.09921		0.0223412
1.2602	1.16535			0.0670642
4.23673	2.95064	2.72974		0.813821
2.56806	2.27044	2.48225		0.153193
2.16286	2.36524	2.42199		0.136214
1.74679	0.995955			0.530922
				0.337114

## Sheet: SE_Acc
0.352513	0.225977			0.0894749
0.57057	0.450491	0.449368		0.0696543
0.423992	0.441002	0.44296		0.0104321
0.405125	0.385809			0.013658
0.622315	0.630176	0.484461		0.0819537
0.479615	0.532808	0.581613		0.0510152
0.59461	0.528158	0.517576		0.0417575
0.370005	0.493458	0.477841		0.0672224
0.516827	0.52107	0.500455		0.0108859
0.344866	0.311405	0.40083		0.0451816
0.522818	0.384745	0.50739		0.0756569
0.572733	0.515402			0.040539
0.490332	0.395758	0.419871		0.0491438
0.418816	0.456031			0.0263147
0.486676	0.478331	0.556648		0.0430103
0.449487	0.587543	0.507603		0.0693149
0.505512	0.54709	0.484096		0.03203
0.491285	0.398062			0.0659184
0.169133	0.215558	0.241973		0.0368751
0.489884	0.537154	0.507675		0.0238748
0.444546	0.404748	0.429536		0.0200982
0.511591	0.586611			0.0530468
				0.0515851

## Sheet: SE_Gyr
0.257361	0.136645			0.0853591
0.447712	0.336334	0.357466		0.0591547
0.347845	0.434045	0.409614		0.0444274
0.181444	0.175426			0.00425532
0.366453	0.430526	0.3167		0.057063
0.343108	0.330144	0.388465		0.0306228
0.286566	0.308127	0.292621		0.0111204
0.15999	0.336038	0.39253		0.121284
0.35302	0.333299	0.334519		0.0110507
0.327465	0.282763	0.323721		0.0247984
0.394341	0.303101	0.33642		0.0461698
0.443567	0.33794			0.0746896
0.451149	0.411574	0.369204		0.0409803
0.179184	0.171784			0.00523214
0.229831	0.252071	0.235651		0.0115335
0.45129	0.486001	0.481616		0.0189021
0.402069	0.406589	0.398507		0.00405001
0.323155	0.26506			0.0410791
0.187265	0.210755	0.249628		0.0314959
0.385498	0.378567	0.374153		0.0057186
0.280888	0.348596	0.30818		0.0340654
0.242582	0.441634			0.140751
				0.0548341

[truncated: 6 more sheets: CORR_AXY, CORR_AXZ, CORR_AYZ, CORR_GXY, CORR_GXZ, CORR_GYZ]
