# Supplementary material for: Reliability and Discriminative Validity of Wearable Sensors for the Quantification of Upper Limb Movement Disorders in Individuals with Dyskinetic Cerebral Palsy
Source: Sensors (Basel). 2023 Feb 1;23(3):1574. doi: 10.3390/s23031574 (PMC9921560; doi:10.3390/s23031574)
Supplement: Supplementary file 1 [file sensors-23-01574-s001.zip › sensor_parameters_long_upperarm_RGV.xlsx]

## Sheet: MaxJerk
241.661	174.715			47.338
131.666	174.655	114.765		30.8778
145.954	156.018	136.705		9.65955
80.1976	60.4314			13.9768
339.705	278.785	311.884		30.498
82.5418	125.225	14.792		55.6886
149.95	236.443	127.989		57.3373
170.482	135.396	157.973		17.7818
117.786	225.023	200.139		56.1263
219.122	178.876	144.409		37.3939
168.084	198.13	227.091		29.505
201.983	100.151	273.159		86.9555
410.891	277.281	227.308		94.9132
57.9091	113.662	116.507		33.0408
396.14	228.695	411.934		101.541
115.536	100.745	166.314		34.3912
401.163	104.854	114.02		168.49
467.644	540.687	704.934		121.531
376.778	124.357	202.653		129.207
204.02	176.698	187.423		13.7658
100.82	99.5128	52.4426		27.5611
				71.212

## Sheet: MaxAnfJerk
9413.58	3974.36			3846.11
7897.24	15699.5	8352.65		4379.09
10732.6	10304.4	10918.8		315.062
4640.32	2671.59			1392.1
19441.3	16404.8	11943.3		3771.49
7721.83	6939.79	575.899		3919.5
5516.59	10300.6	5522.69		2760.31
9322.78	7062.17	11091.9		2019.86
6351.16	10078.8	10476.8		2275.76
12075.4	14878.8	9597.14		2642.5
7599.7	6014.65	7387.59		860.461
9505.34	6533.01	13542.3		3518.11
20908.5	17071.6	18309.6		1958.28
2299.69	9460.27	5051.45		3612.1
47672.2	17872.2	20125.5		16592.9
7235.4	8550.43	7894.41		657.52
51371.6	7908.74	8690.64		24870.7
52574.7	74897	81034		14977.1
51742.3	7144.56	10842.8		24750.1
12621.1	10426.5	9029.24		1810.61
1623.39	1658.83	1431.59		122.255
				9395.88

## Sheet: MeanAcc
1.42345	1.59769			0.123203
0.977337	1.51247	1.73104		0.387772
1.47747	1.63305	1.53952		0.0783205
0.88507	0.905292			0.014299
1.69664	2.29281	2.35254		0.362676
1.34233	1.27681	0.383684		0.535566
1.05722	1.31695	1.32549		0.152477
1.69489	1.20725	1.7462		0.297461
1.3025	1.46111	1.38877		0.0794074
1.55165	1.56511	1.53134		0.017
1.18442	1.11343	1.27059		0.0787013
1.66749	1.41764	1.93602		0.259247
1.56577	1.21866	2.00657		0.394882
0.65828	0.622442	0.740375		0.0604594
2.07346	1.92365	2.31311		0.196446
1.52283	1.6802	1.65444		0.0844079
1.18281	1.17783	1.11888		0.0355594
1.68836	1.57202	1.91993		0.177111
1.95144	1.6376	1.88902		0.166136
2.04069	2.15917	2.40859		0.187795
0.940313	0.938351	0.936314		0.00199949
				0.227071

## Sheet: MaxAcc
13.265	9.42075			2.71833
8.78567	6.6696	6.62998		1.23331
7.61438	6.65444	6.28521		0.686114
4.73644	3.7126			0.723964
14.0087	13.8508	13.9343		0.0789615
4.42849	5.89234	1.4636		2.25637
7.28725	14.7199	7.17398		4.32433
11.2578	7.95206	9.17233		1.67161
5.76105	10.8074	10.0883		2.72973
8.83275	7.90221	6.92173		0.95562
6.64143	6.11487	11.561		3.0039
6.81371	4.30269	8.50808		2.11587
11.7867	9.01105	6.91525		2.4436
3.56809	4.17586	4.63752		0.536377
16.4428	10.0009	14.7549		3.34033
5.93944	6.44017	5.79447		0.338791
16.0924	5.84316	8.25743		5.35823
17.3036	25.2553	27.6528		5.41729
16.1344	7.31605	10.7744		4.44324
8.19748	7.66063	11.5121		2.08601
3.54614	3.68472	2.28406		0.771781
				2.74851

## Sheet: MeanGyr
0.943496	1.21083			0.189034
0.747258	1.18315	1.25547		0.274929
1.32333	1.42529	1.33081		0.0568274
0.671727	0.687271			0.0109912
1.2426	1.60381	1.53631		0.192047
1.07285	1.04557	0.103503		0.551945
0.810054	0.921555	0.923232		0.0648649
1.06724	0.708973	1.11837		0.223074
1.07697	1.11467	1.01531		0.0501555
1.01658	1.03248	0.993116		0.0198023
0.566244	0.499797	0.620275		0.0603457
1.58046	1.49811	1.5724		0.0453963
1.41507	0.873738	1.95391		0.540087
0.454111	0.413116	0.563856		0.0779391
1.59089	1.39971	1.75799		0.179276
1.29583	1.35593	1.30226		0.0329999
0.630895	0.675573	0.598909		0.0385067
1.20731	1.03878	1.32469		0.143714
1.4243	1.16222	1.27251		0.13159
1.59731	1.7235	1.85564		0.129176
0.361241	0.310966	0.333505		0.0251826
				0.207771

## Sheet: MaxGyr
8.56972	5.85737			1.91792
4.32437	3.64495	4.00086		0.339835
4.44222	3.72116	4.04634		0.361105
4.80452	3.08629			1.21498
5.22294	6.53415	5.71867		0.66207
2.47564	2.60235	1.05452		0.859402
3.43551	4.20689	4.21712		0.448338
4.00381	4.92272	4.37773		0.462097
3.75727	6.6086	5.92107		1.48799
4.49589	3.14872	2.76455		0.909208
2.66008	4.09831	4.39733		0.928797
4.15677	3.48013	4.94593		0.73362
5.41114	5.05383	4.86629		0.276798
2.4288	2.49169	2.63697		0.106767
10.725	4.53556	8.00241		3.10215
3.5594	3.52314	3.50994		0.0256114
10.2621	2.60208	5.19116		3.89645
12.6256	12.6654	13.1559		0.295339
10.522	5.91578	4.95989		2.97401
4.20678	4.01704	4.40468		0.193834
1.29828	1.64606	1.19296		0.237114
				1.46959

## Sheet: RMSGyr
1.38657	1.57247			0.131456
1.14524	1.48475	1.54769		0.216483
1.543	1.60701	1.5627		0.0327843
0.891354	0.887238			0.0029105
1.5713	1.9218	1.94143		0.208261
1.23406	1.22042	0.180721		0.604245
1.08556	1.21356	1.20533		0.0716441
1.3857	1.13419	1.43458		0.16118
1.36169	1.51231	1.35556		0.0887841
1.25909	1.22853	1.17629		0.0418694
0.720187	0.717618	0.806003		0.0503044
1.90587	1.75757	2.01048		0.127082
1.73866	1.42666	2.3075		0.446619
0.650581	0.603516	0.786011		0.0947458
1.92368	1.62444	2.05556		0.220907
1.58934	1.62016	1.61608		0.016743
0.929943	0.844586	0.803762		0.0643866
1.74626	1.54831	2.03326		0.243835
1.84	1.41194	1.56066		0.217323
1.87966	1.9848	2.1304		0.125911
0.424033	0.350656	0.379978		0.0369343
				0.209161

## Sheet: RMSAcc
1.99288	2.0698			0.0543928
1.43654	1.85235	2.05457		0.315105
1.76496	1.91767	1.87015		0.07815
1.00107	1.00645			0.00380234
2.17964	2.87995	3.13159		0.493281
1.51768	1.47898	0.407009		0.630373
1.32547	1.70436	1.62142		0.199176
2.00823	1.59666	2.09273		0.265398
1.55903	1.88954	1.69688		0.16601
1.7804	1.79262	1.721		0.0383112
1.37805	1.34388	1.57184		0.122941
1.92885	1.57798	2.39054		0.407536
1.90985	1.66273	2.33241		0.33865
0.814122	0.77498	0.923825		0.0771598
2.58411	2.32556	2.86787		0.271253
1.74707	1.91003	1.88685		0.0881613
1.42379	1.31748	1.28861		0.0711885
2.47873	2.44294	3.07159		0.353071
2.52872	1.89668	2.27273		0.317919
2.33076	2.47109	2.79228		0.236593
0.990146	0.984749	0.980863		0.00466184
				0.272396

## Sheet: SE_Acc
0.272986	0.351965			0.0558466
0.0810545	0.413314	0.398058		0.187581
0.503167	0.491253	0.430282		0.0390974
0.378869	0.411249			0.0228958
0.423496	0.509268	0.308563		0.100705
0.623291	0.575778	0.265182		0.194495
0.461847	0.455402	0.527932		0.0401441
0.478065	0.126167	0.451925		0.196058
0.55735	0.481323	0.409439		0.0739652
0.448422	0.419126	0.411755		0.0193954
0.604769	0.372008	0.526402		0.118431
0.504273	0.625545	0.42368		0.101613
0.368806	0.122218	0.472229		0.179819
0.412562	0.342768	0.403285		0.0379024
0.527667	0.589373	0.522493		0.0372094
0.558794	0.581585	0.502428		0.0407482
0.417741	0.542137	0.408968		0.0744817
0.275313	0.249886	0.225153		0.0250805
0.414475	0.505547	0.465259		0.0456364
0.552947	0.553294	0.522262		0.0178171
0.557678	0.597378	0.588799		0.0208893
				0.0986592

## Sheet: SE_Gyr
0.146124	0.234108			0.0622145
0.0692265	0.275244	0.330868		0.137836
0.368705	0.437494	0.362974		0.0414691
0.175318	0.177246			0.00136335
0.303934	0.370833	0.252427		0.0593694
0.446092	0.419118	0.0380677		0.228185
0.215632	0.279465	0.291139		0.0406452
0.270618	0.0668955	0.249118		0.11193
0.266795	0.241545	0.235878		0.0164595
0.298337	0.333098	0.325052		0.018197
0.39412	0.235591	0.34172		0.0807678
0.293024	0.333289	0.229519		0.0523172
0.268524	0.0458748	0.334927		0.151401
0.169668	0.134772	0.1633		0.0185837
0.454815	0.553251	0.528025		0.0511301
0.323321	0.366553	0.309589		0.029728
0.200807	0.374604	0.270359		0.0874737
0.200679	0.212902	0.180449		0.0163904
0.306659	0.329241	0.323907		0.0118031
0.382948	0.423748	0.415879		0.0216448
0.352003	0.498267	0.441463		0.0737371
				0.0830828

[truncated: 6 more sheets: CORR_AXY, CORR_AXZ, CORR_AYZ, CORR_GXY, CORR_GXZ, CORR_GYZ]
