# Supplementary material for: Reliability and Discriminative Validity of Wearable Sensors for the Quantification of Upper Limb Movement Disorders in Individuals with Dyskinetic Cerebral Palsy
Source: Sensors (Basel). 2023 Feb 1;23(3):1574. doi: 10.3390/s23031574 (PMC9921560; doi:10.3390/s23031574)
Supplement: Supplementary file 1 [file sensors-23-01574-s001.zip › sensor_parameters_long_wrist_RF.xlsx]

## Sheet: MaxJerk
544.483	353.663			134.93
446.449	570.482	417.735		81.1793
679.286	424.368	489.869		132.383
267.284	279.896			8.91816
324.745	521.207	462.687		100.871
545.684	381.579	750.049		184.601
363.15	444.258	335.362		56.5818
561.913	536.676	622.971		44.3695
413.095	300.201	385.374		58.8329
551.04	756.433	506.471		133.325
202.931	170.348	223.15		26.6409
785.266	635.682			105.772
577.717	788.871	906.833		166.742
197.592	265.04			47.6928
77.557	102.184	63.7488		19.4696
838.275	709.768	1165.19		234.806
547.93	377.925	472.547		85.1839
186.374	147.08			27.7845
1076.04	986.845	798.615		141.626
592.229	344.222	367.588		136.941
364.524	503.349	470.999		72.6361
230.494	242.231			8.29896
				109.281

## Sheet: MaxAnfJerk
24619	13177.5			8090.4
19920.5	17241.5	15494.7		2229.17
48218.2	22147.7	20323.2		15605.2
8461.04	9129.92			472.968
7101.03	10726.9	8198.07		1859.47
13055.6	10017.8	25298.1		8089.04
6512.58	8948.27	7335.33		1239.02
15657.7	17145.7	17301.9		907.551
17409	23548.6	27561.2		5113.11
18760.7	15901.1	11667.1		3568.94
11753.2	8958.69	11229		1485.4
14955.8	13090.2			1319.14
21549.8	21986.1	28140.9		3685.88
4206.77	7001.09			1975.88
4642.55	4871.57	2343.75		1398.02
59589.2	72723.4	58361.4		7961.16
27333.6	19472.8	18348.7		4895.31
17731.9	13946.1			2676.9
120796	51656.5	46174.3		41590.7
30170.9	13064.5	22474.7		8567.51
19626.7	23703.3	19285.2		2458.13
6236.03	8245.84			1421.14
				10342.9

## Sheet: MeanAcc
2.54523	2.53896			0.00443003
2.92319	2.86163	2.75794		0.0835173
2.81251	3.05847	3.05775		0.141797
1.29924	1.32226			0.016277
3.99619	4.62758	3.93217		0.384349
2.34421	2.17712	3.20711		0.55278
2.78593	3.05352	2.59924		0.228335
2.64895	3.07834	3.37107		0.363211
2.4634	2.31808	2.30516		0.0878691
2.34148	2.10721	2.20493		0.117667
2.05394	1.84269	1.98039		0.107239
3.29343	3.04299			0.177087
3.28613	3.89744	3.7465		0.318439
1.68816	1.5434			0.102356
1.43909	1.41567	1.40059		0.0193985
7.73996	4.83235	4.89818		1.66003
3.49999	3.63426	3.45424		0.0935639
1.39872	1.24053			0.111862
4.29025	3.23975	3.40447		0.564993
3.88248	3.72876	3.95317		0.114736
3.53823	3.93621	4.29045		0.37632
2.28909	2.4631			0.123043
				0.432093

## Sheet: MaxAcc
19.9918	19.0654			0.655067
19.1214	22.1373	19.0536		1.76111
25.1539	18.2194	21.5236		3.46854
9.99922	11.4977			1.0596
17.5533	24.4966	23.7419		3.80958
23.4586	17.6739	31.9129		7.1611
19.3645	22.5451	17.1131		2.72924
27.3058	24.9537	26.5422		1.19992
15.788	12.2705	14.8919		1.82792
21.7717	27.2699	19.4484		4.0167
14.623	10.1633	10.7957		2.4131
31.6105	25.9316			4.01554
25.9274	34.0658	36.2022		5.4217
9.38865	12.1555			1.95648
5.46028	5.58499	4.33144		0.690555
34.7804	38.2503	41.4976		3.3592
17.6305	16.8821	16.0757		0.777588
6.7979	11.2848			3.17273
49.6853	41.4017	34.1136		7.79117
24.2833	15.8006	17.8759		4.4219
19.1339	23.2288	22.5639		2.19755
11.3962	11.1138			0.199719
				3.52632

## Sheet: MeanGyr
1.5488	1.36619			0.129122
1.7511	1.60707	1.53221		0.111251
1.53734	1.60573	1.66159		0.0622332
0.624728	0.64708			0.0158053
1.70712	1.8469	1.58747		0.129847
1.17491	1.06246	1.39791		0.170735
1.4217	1.48022	1.3184		0.0819366
1.04899	1.40827	1.57105		0.267124
1.185	1.17789	1.2263		0.0261392
0.957673	0.918918	0.96647		0.0253004
0.946871	0.966653	1.07556		0.0693
1.79033	1.80817			0.0126123
1.89135	1.90844	1.90138		0.00858775
0.686407	0.596399			0.0636453
0.61758	0.592222	0.590945		0.0150228
4.09741	2.89173	2.71924		0.750865
1.73713	1.85748	1.63914		0.109358
0.81342	0.664096			0.105588
2.29924	1.79777	1.95772		0.256152
1.69567	1.72396	1.72492		0.016615
1.81517	2.12532	2.16662		0.192099
0.887801	0.94722			0.0420153
				0.19764

## Sheet: MaxGyr
9.2198	6.60535			1.8487
9.0923	6.81284	5.73025		1.71617
8.31363	6.27649	6.3118		1.16608
2.54854	2.26553			0.200117
4.55103	4.82792	5.20354		0.327498
3.3732	3.34558	4.66846		0.755916
4.82422	5.00466	4.92002		0.0902755
5.35397	5.01024	5.27677		0.180348
4.94568	5.80271	7.54162		1.3227
4.09869	4.31568	3.29719		0.536474
3.92465	4.44802	4.3844		0.285579
6.76795	6.37701			0.276438
6.9848	7.71956	10.8075		2.02847
3.36387	3.01804			0.244538
2.59704	2.01591	1.86545		0.386346
15.924	19.5905	15.2905		2.32147
6.2828	6.92863	5.79861		0.566934
5.97396	5.54713			0.301812
19.052	14.4986	11.8632		3.63677
6.35433	5.75022	6.80517		0.529331
5.76806	6.3581	7.41561		0.834757
3.82438	3.77016			0.0383368
				1.26145

## Sheet: RMSGyr
2.01384	1.90626			0.0760692
2.06928	1.98813	1.85901		0.106041
1.88062	1.85922	1.96279		0.054676
0.763213	0.782423			0.0135834
1.97517	2.15199	1.94029		0.113505
1.38179	1.24184	1.64712		0.205848
1.83767	1.93541	1.7563		0.0896817
1.50725	1.79257	1.95545		0.226869
1.48172	1.52002	1.57769		0.0483144
1.15429	1.13798	1.13969		0.00896387
1.13046	1.16936	1.27893		0.0769854
2.13999	2.22235			0.0582355
2.24781	2.33703	2.39513		0.0742078
0.97996	0.877365			0.0725456
0.761155	0.727957	0.714292		0.0241005
4.76856	3.65145	3.33446		0.753333
2.0929	2.16675	1.96447		0.102363
1.11988	0.921064			0.140585
3.23917	2.56806	2.6306		0.370733
2.06801	2.06975	2.19746		0.0742386
2.13258	2.46585	2.54071		0.217271
1.17336	1.2001			0.0189048
				0.207401

## Sheet: RMSAcc
3.30495	3.38252			0.054844
3.562	3.7791	3.60931		0.114162
3.73384	3.95152	3.96212		0.128846
1.57645	1.64371			0.0475596
4.63132	5.50277	4.89287		0.447178
3.48928	2.9138	4.51306		0.810033
3.35492	3.76476	3.1261		0.323579
3.61673	3.98549	4.45716		0.421265
2.99696	2.79156	2.7809		0.121781
3.36734	3.07895	2.92101		0.226319
2.54777	2.30597	2.41884		0.120989
4.92738	4.57419			0.249745
4.86707	5.98542	5.85925		0.612515
1.95322	1.79823			0.109595
1.6271	1.60939	1.58405		0.0216347
9.14375	6.18733	6.52301		1.61871
4.22933	4.30007	4.21676		0.044912
1.6425	1.48118			0.114066
6.79011	4.9817	4.83568		1.08869
4.77903	4.42191	4.81695		0.217959
4.36084	4.89714	5.2002		0.425046
2.73529	3.00741			0.192423
				0.512994

## Sheet: SE_Acc
0.250147	0.15648			0.066232
0.456141	0.332158	0.356155		0.0657582
0.247284	0.282741	0.296348		0.0253299
0.27683	0.264625			0.00863018
0.437323	0.402418	0.366049		0.0356394
0.222906	0.253057	0.261157		0.020157
0.404974	0.366022	0.378755		0.0198609
0.185885	0.336038	0.333111		0.0858585
0.457098	0.411911	0.461618		0.0274864
0.211942	0.205277	0.277457		0.0398884
0.479383	0.428019	0.478369		0.0293668
0.211796	0.185831			0.0183599
0.243389	0.213455	0.196568		0.0237114
0.282379	0.263158			0.013591
0.344088	0.325129	0.351601		0.0136419
0.472394	0.400613	0.356988		0.0582724
0.462084	0.47587	0.440012		0.0180879
0.428619	0.323899			0.0740484
0.130615	0.157715	0.178331		0.0239316
0.331023	0.377862	0.336642		0.0255755
0.264487	0.255618	0.26434		0.00507854
0.372646	0.367073			0.00394029
				0.0392097

## Sheet: SE_Gyr
0.279249	0.120607			0.112177
0.509959	0.382868	0.391373		0.071048
0.411017	0.478252	0.494738		0.0443499
0.280564	0.270554			0.00707826
0.46381	0.464932	0.391921		0.0418331
0.39214	0.365645	0.44101		0.0382323
0.26169	0.269322	0.244014		0.0129815
0.160851	0.304827	0.380067		0.11139
0.404715	0.320102	0.324389		0.0476622
0.355936	0.342097	0.395012		0.0274422
0.445481	0.456797	0.460684		0.00789818
0.355414	0.331061			0.01722
0.360899	0.319188	0.31963		0.0239554
0.186757	0.160412			0.0186286
0.25832	0.275219	0.287462		0.014633
0.526167	0.434392	0.460143		0.0473371
0.419691	0.475241	0.467518		0.0300912
0.267187	0.226072			0.0290725
0.211857	0.19922	0.253754		0.0285452
0.302701	0.309446	0.23881		0.0389808
0.352809	0.342278	0.293812		0.0314655
0.227025	0.312273			0.0602799
				0.0481025

[truncated: 6 more sheets: CORR_AXY, CORR_AXZ, CORR_AYZ, CORR_GXY, CORR_GXZ, CORR_GYZ]
