# Supplementary material for: Reliability and Discriminative Validity of Wearable Sensors for the Quantification of Upper Limb Movement Disorders in Individuals with Dyskinetic Cerebral Palsy
Source: Sensors (Basel). 2023 Feb 1;23(3):1574. doi: 10.3390/s23031574 (PMC9921560; doi:10.3390/s23031574)
Supplement: Supplementary file 1 [file sensors-23-01574-s001.zip › sensor_parameters_long_wrist_RGV.xlsx]

## Sheet: MaxJerk
1028.57	968.897			42.1941
617.615	639.961	725.922		57.1823
473.845	537.018	584.346		55.44
232.002	296.988			45.9521
614.617	616.25	864.002		143.513
304.055	337.706	38.8564		163.694
325.181	395.694	291.903		52.9967
568.442	378.32	531.52		100.813
328.89	343.475	297.251		23.6302
652.477	807.295	612.799		102.771
202.985	205.883	248.429		25.4417
539.221	307.25	594.906		152.566
685.883	704.841	711.664		13.3581
139.495	258.073	196.549		59.303
1001.51	584.686	1214.66		320.429
580.91	385.825	651.961		137.801
125.722	202.714	156.058		38.7829
962.328	821.753	1454.69		332.36
757.632	330.347	610.946		217.112
763.958	541.736	524.299		133.618
484.63	459.36	235.852		136.922
				142.546

## Sheet: MaxAnfJerk
43908.9	24420.1			13780.6
17082.5	15630.8	28924.8		7292.43
18168.3	26834	28025.5		5380.22
8256.1	10915.6			1880.52
15727.6	20880	17915.4		2585.94
8063.41	13008.9	3753.81		4631.17
4918.89	6443.76	7227.53		1173.98
12888.5	10225.9	13820.9		1865.57
16967	18187.1	13311.2		2537.33
15483.5	22045.4	20178.1		3380.92
10611.3	12459.3	12738		1155.83
12434.4	14282.6	9219.1		2562.32
14038.9	20438.9	11333.2		4676.1
7803.59	5748.55	7353.64		1080.27
90824.2	31270.4	85446.9		32941
19853.2	10703.2	15676.4		4580.79
13185.3	14364.3	12105.1		1129.97
47358.1	44530.1	80333.3		19904.9
25012.4	16230.5	14903.2		5493.61
18287.1	19637.3	17279.7		1182.96
6695.78	10326.9	9076.22		1844.61
				9501.69

## Sheet: MeanAcc
2.44295	3.17881			0.520333
1.76812	2.69372	2.93483		0.615913
2.85891	3.21594	2.95014		0.18549
1.43312	1.45273			0.0138623
2.8551	3.54574	3.77081		0.477175
2.1249	2.11948	0.565569		0.898718
2.12703	2.38283	2.39511		0.151359
2.6392	1.93392	2.87544		0.489849
2.22983	2.2489	2.14791		0.053656
2.26497	2.25137	2.18776		0.0412154
1.70676	1.52422	1.79695		0.138949
2.75077	2.26668	3.11195		0.424119
2.47855	1.85877	3.1459		0.643712
1.44974	1.38516	1.60613		0.11362
4.51525	3.82946	5.15967		0.665214
2.83458	3.11616	3.16526		0.178437
1.39956	1.40243	1.33507		0.0380903
2.68499	2.55402	2.89895		0.174118
3.45624	3.03587	3.348		0.218272
4.04701	4.38439	4.71088		0.331953
2.15438	2.10234	2.25853		0.0795325
				0.395466

## Sheet: MaxAcc
41.0254	36.2236			3.39533
23.8857	24.7163	25.0573		0.602611
20.76	25.4058	23.8019		2.35973
10.2439	11.8645			1.14594
28.7806	33.1064	36.0458		3.65458
14.9037	17.3787	3.08901		7.63663
16.386	21.7917	15.0951		3.55276
20.3007	16.8679	22.4393		2.81069
14.5647	11.9546	14.3002		1.43669
26.7603	29.2365	24.6607		2.29045
9.39125	10.9462	12.0616		1.34118
22.5361	14.2494	23.2124		4.99101
24.1778	28.2943	23.8347		2.48164
7.86671	11.2113	9.73519		1.67614
35.9397	26.1043	47.3301		10.6223
26.337	16.8127	23.7662		4.92738
8.68658	9.09119	9.5351		0.424412
41.7549	42.8993	42.8629		0.650453
32.2221	19.7038	23.8138		6.38096
28.0484	22.7252	22.9432		3.01238
18.0787	16.2388	12.1128		3.05511
				4.08713

## Sheet: MeanGyr
1.36655	1.85166			0.343024
0.829954	1.38011	1.51131		0.361509
1.45257	1.58476	1.48443		0.0689861
0.753643	0.782506			0.0204095
0.980326	1.13291	1.10361		0.0809719
0.995348	0.973192	0.228925		0.436239
0.964164	0.98691	1.05245		0.045839
1.15966	0.749076	1.23419		0.261239
1.13794	1.20134	1.04622		0.0779902
1.00485	0.921598	0.937881		0.0441248
0.7693	0.62463	0.89331		0.134473
1.62086	1.46701	1.48192		0.0848487
1.25129	0.816463	1.62471		0.404514
0.646321	0.585916	0.742414		0.0789245
2.60129	2.29779	2.94077		0.321658
1.43375	1.52745	1.40332		0.0646966
0.795806	0.874441	0.736128		0.0693725
1.53317	1.42807	1.57884		0.0773137
1.57504	1.41579	1.50032		0.0796716
1.97002	2.17704	2.32114		0.176494
0.861915	0.957339	0.958264		0.055362
				0.205045

## Sheet: MaxGyr
13.8123	10.3191			2.47005
8.08026	7.96474	7.46579		0.326562
9.10551	6.92679	9.72764		1.47075
3.61416	3.61799			0.00271087
3.59506	6.45099	5.65695		1.47412
2.4616	2.85843	3.7404		0.654556
3.57957	4.10637	4.50358		0.463517
6.64522	6.76112	6.38447		0.192911
6.0631	7.90976	5.91133		1.11257
5.34278	5.97163	7.50358		1.11141
3.77521	4.56631	4.16358		0.395572
5.15368	4.3451	5.20242		0.481517
5.90376	5.90678	6.04317		0.0796326
3.32028	3.90428	4.52985		0.604901
15.6285	14.5604	17.776		1.6377
6.0451	5.97522	4.09549		1.10599
6.88556	6.0753	7.29326		0.619968
20.6765	19.3754	15.4942		2.69605
7.93813	8.22501	7.80111		0.216319
6.65085	5.83292	6.52599		0.440637
3.84423	4.00093	3.64497		0.178402
				1.11887

## Sheet: RMSGyr
2.12049	2.49983			0.268234
1.35824	1.86693	2.01244		0.343489
1.92968	2.01589	1.9728		0.0431066
0.961861	1.00308			0.0291494
1.2566	1.4673	1.52121		0.139832
1.18913	1.2041	0.535151		0.381968
1.32871	1.33362	1.39109		0.0346867
1.5901	1.31111	1.73715		0.216398
1.45295	1.61532	1.39279		0.115109
1.30323	1.17473	1.19864		0.0683414
0.960346	0.880486	1.11696		0.120296
1.96806	1.71052	1.91017		0.135115
1.60223	1.38704	2.05221		0.339419
0.928276	0.887649	1.10791		0.117214
3.24462	2.82195	3.63798		0.4081
1.75787	1.84262	1.70533		0.0692704
1.17064	1.13789	1.06609		0.0534743
2.26623	2.20294	2.47053		0.139852
2.03329	1.81224	1.93322		0.110693
2.35285	2.54375	2.68836		0.168284
1.13157	1.21785	1.23898		0.0568998
				0.198001

## Sheet: RMSAcc
3.90231	4.83197			0.657369
2.69875	3.6964	4.05174		0.701444
3.72779	4.30618	3.97708		0.290107
1.69319	1.69813			0.00349644
4.31778	5.28916	6.15915		0.921149
2.765	2.89323	0.72375		1.21722
2.61056	3.02696	2.94742		0.221054
3.36428	2.70316	3.68777		0.501862
2.72034	2.79225	2.70041		0.048309
3.15436	3.34913	3.33441		0.108454
2.02234	1.9045	2.19407		0.145618
3.7009	2.83881	4.36021		0.762947
3.32621	2.95601	4.17849		0.626881
1.69626	1.65937	1.9413		0.15324
5.86511	4.72839	6.66668		0.973961
3.62576	3.81791	3.88073		0.132838
1.66199	1.64206	1.56929		0.0487947
4.16487	4.04808	5.02376		0.532805
4.62797	3.81976	4.35611		0.411258
5.03086	5.24909	5.57089		0.271669
2.73534	2.58397	2.8482		0.13258
				0.542748

## Sheet: SE_Acc
0.131709	0.190333			0.0414532
0.0798499	0.255423	0.318446		0.123643
0.326143	0.292337	0.292371		0.0195079
0.337244	0.368294			0.0219558
0.2738	0.318491	0.227829		0.0453324
0.408073	0.351884	0.0661966		0.183327
0.321295	0.312936	0.366503		0.0288188
0.346354	0.0822185	0.304216		0.141907
0.442786	0.42701	0.288685		0.084784
0.300293	0.25776	0.222501		0.0389528
0.593615	0.317692	0.551323		0.148608
0.367282	0.339345	0.234348		0.0700906
0.294023	0.0770891	0.279555		0.121286
0.293515	0.254586	0.207195		0.0432293
0.39992	0.490888	0.464852		0.0468497
0.390767	0.496507	0.393615		0.0602438
0.351587	0.474127	0.331039		0.0773654
0.168019	0.164719	0.115377		0.0294862
0.293194	0.340151	0.341499		0.027508
0.366196	0.407595	0.410252		0.0247046
0.316302	0.41837	0.357457		0.0513516
				0.0826541

## Sheet: SE_Gyr
0.128299	0.276539			0.104822
0.0666993	0.26534	0.324605		0.135084
0.32859	0.368054	0.287001		0.0405314
0.248881	0.207361			0.0293591
0.335034	0.301343	0.258118		0.0385565
0.448374	0.375559	0.0251132		0.226298
0.187235	0.224204	0.280758		0.0471021
0.252395	0.0648868	0.181398		0.0946704
0.367758	0.319002	0.267013		0.0503816
0.300658	0.337582	0.312296		0.0188776
0.473162	0.272274	0.501677		0.12503
0.320926	0.36511	0.235576		0.0658482
0.266764	0.0476458	0.317473		0.143405
0.154023	0.116221	0.123547		0.0200475
0.419521	0.453576	0.486456		0.0334693
0.380294	0.39218	0.387009		0.00595994
0.181275	0.316971	0.233342		0.0684569
0.189951	0.184153	0.140698		0.026919
0.262894	0.282651	0.283922		0.011791
0.391484	0.400758	0.396835		0.00465548
0.261694	0.277224	0.26421		0.00833513
				0.083451

[truncated: 6 more sheets: CORR_AXY, CORR_AXZ, CORR_AYZ, CORR_GXY, CORR_GXZ, CORR_GYZ]
