# Supplementary material for: Reliability and Discriminative Validity of Wearable Sensors for the Quantification of Upper Limb Movement Disorders in Individuals with Dyskinetic Cerebral Palsy
Source: Sensors (Basel). 2023 Feb 1;23(3):1574. doi: 10.3390/s23031574 (PMC9921560; doi:10.3390/s23031574)
Supplement: Supplementary file 1 [file sensors-23-01574-s001.zip › sensor_parameters_long_wrist_RS.xlsx]

## Sheet: MaxJerk
428.389	555.303			89.7415
436.663	447.235	601.259		92.1295
478.804	722.046	639.601		123.706
310.585	278.014			23.0312
308.289	395.467	297.122		53.8461
440.997	492.283	304.415		97.1076
414.05	521.424			75.9245
462.236	906.747	637.793		223.885
443.476	606.148			115.026
478.661	515.709	553.09		37.2145
278.849	206.934	288.903		44.706
445.523	431.785			9.71462
706.945	594.422	793.943		100.032
197.187	196.152	136.363		34.8219
94.3356	336.413	204.421		121.204
978.367	1081.53	1283.08		154.98
455.544	484.77	351.663		69.9559
210.718	372.265	317.666		82.1749
1349.35	1128.49			156.166
469.846	817.575	571.323		178.817
683.072	896.704	484.932		205.934
125.675	183.716			41.0411
				112.681

## Sheet: MaxAnfJerk
18191	10631.2			5345.59
26906.8	33885.2	26093.3		4283.19
26915	39659	39227.3		7236.36
6014.28	6605.53			418.077
16881.6	8198.15	17535.6		5212.46
20135.1	23451.6	20289.9		1871.71
17156.3	19374.3			1568.33
21676.1	33022.8	30886.9		6029.75
30402	25218			3665.65
14428	17412.1	13958.6		1873.15
10514.7	9712.01	10448.7		445.624
13055.7	35724.7			16029.4
20010.8	24746.6	23290.6		2425.73
6973.15	12943.9	8427.45		3113.5
6327.26	9442.36	7321.28		1591.17
47511.3	46938.2	75152.7		16126.8
15320.9	18400.4	18818.7		1910.17
21568.4	20002	17124		2254.22
93220.1	63692.2			20879.4
11954.2	15435.6	19007.7		3526.89
42190.1	60416	22624.4		18899.8
6636.26	9182.56			1800.51
				8363.29

## Sheet: MeanAcc
2.01781	2.44337			0.30092
3.17769	3.38011	3.58747		0.204892
3.84822	3.62867	3.65976		0.118801
1.63793	1.77541			0.0972151
3.37003	4.21156	3.91351		0.426685
2.95213	2.58228	2.20808		0.372029
4.97383	6.81308			1.30054
2.50793	2.96182	2.92065		0.251015
3.18684	3.10048			0.0610606
2.313	2.56748	2.39099		0.130379
1.57697	1.80447	1.86912		0.153455
2.77568	2.9042			0.0908739
3.76436	4.39983	4.13489		0.31919
1.51029	1.57268	1.75641		0.127949
1.59583	1.75021	1.95342		0.179349
5.5044	5.56413	7.19582		0.959765
3.44181	3.4629	3.50939		0.0345748
2.38664	1.72392	2.37494		0.379286
4.11995	4.3755			0.180703
3.62546	4.42381	3.62934		0.459811
3.7206	4.48002	3.15051		0.666996
2.83135	2.98448			0.108279
				0.436974

## Sheet: MaxAcc
16.1682	25.1217			6.33108
19.8629	20.7891	22.5888		1.38607
22.5883	32.1341	29.8778		4.98913
14.1795	13.3004			0.621618
18.5307	22.9363	19.9255		2.25163
22.6603	25.0514	17.9966		3.58786
24.8122	29.669			3.4343
28.2336	42.6728	33.0088		7.35626
15.2466	21.6431			4.52299
21.8399	23.8222	23.072		1.00083
13.1307	11.7545	13.37		0.871859
22.7711	20.9173			1.31086
29.415	30.8539	33.8359		2.2549
10.7332	11.0275	11.2096		0.240405
6.07024	12.1082	10.1976		3.08605
41.3858	42.7188	57.4743		8.92879
20.7288	21.7531	19.5064		1.12483
10.3065	13.4525	14.7194		2.27215
54.6185	48.9955			3.97607
23.1368	36.082	23.3811		7.40441
29.0126	33.1897	20.0055		6.73795
11.2935	10.6073			0.485206
				4.22201

## Sheet: MeanGyr
1.29272	1.70776			0.293478
2.14699	2.17039	2.33182		0.100636
2.38363	2.24956	2.28249		0.0698685
1.00775	1.14971			0.10038
1.97091	2.39126	2.25483		0.214444
1.93156	1.6125	1.24685		0.34262
2.2678	2.92657			0.46582
1.31654	1.7232	1.8668		0.28542
1.8786	1.76623			0.0794527
1.42264	1.54062	1.39668		0.076715
0.955365	1.09668	1.10591		0.084379
2.12954	2.30489			0.12399
2.38493	2.62572	2.58884		0.12969
0.65145	0.708616	0.837111		0.0950868
1.027	1.20667	1.30807		0.142338
3.07181	3.50323	4.45914		0.709998
2.17489	2.14814	2.20745		0.0297028
1.90964	1.15687	1.93057		0.440777
2.15955	2.39759			0.168319
2.18313	2.33455	2.07883		0.128579
2.48171	3.05554	2.2053		0.433705
1.4069	1.4819			0.0530376
				0.268742

## Sheet: MaxGyr
7.67755	7.5019			0.124198
7.42956	9.98317	9.46949		1.35069
7.82538	8.53579	13.0427		2.82952
3.97688	4.05118			0.0525425
4.31921	5.10887	6.0595		0.871387
4.81618	7.10049	4.47919		1.42612
5.89568	5.8714			0.0171661
9.40683	10.3328	8.86456		0.742406
8.83238	9.56982			0.521453
4.72097	4.89865	4.95674		0.122836
7.04319	6.74207	6.21989		0.416567
5.19703	11.3453			4.34748
7.08693	6.8632	8.76531		1.03964
3.05149	3.74141	4.75455		0.856627
3.00274	3.76017	3.29315		0.382133
12.7097	17.5184	17.8442		2.87499
5.78475	6.13375	5.67952		0.237766
10.3427	10.2466	10.4565		0.105056
15.9752	13.9927			1.40179
6.14754	5.89149	6.86998		0.507429
8.56131	9.9277	5.32496		2.36383
5.21518	4.82843			0.273478
				1.51857

## Sheet: RMSGyr
1.70571	1.98748			0.199238
2.58028	2.58481	2.74081		0.091403
2.68648	2.58418	2.60784		0.0535559
1.29108	1.47054			0.126899
2.29638	2.72281	2.59062		0.218285
2.1422	2.04005	1.72721		0.216226
2.77429	3.28321			0.359855
1.90443	2.33977	2.51384		0.313901
2.44867	2.30438			0.10203
1.69488	1.79626	1.73917		0.0508228
1.23169	1.37452	1.35951		0.0784916
2.50156	2.55033			0.0344879
2.82429	3.01334	3.07998		0.132636
0.937461	1.00474	1.1671		0.118055
1.26125	1.41468	1.55753		0.148172
3.78494	4.2397	5.34933		0.804717
2.55442	2.57106	2.5961		0.0209816
2.38465	1.63711	2.40212		0.436719
2.96965	3.19788			0.161381
2.49364	2.6303	2.38039		0.12514
3.03719	3.36265	2.54672		0.410734
1.84735	1.86962			0.0157485
				0.262217

## Sheet: RMSAcc
2.58588	3.14246			0.393563
3.9528	4.22725	4.65091		0.351702
4.82502	4.76908	4.66584		0.0807498
2.01555	2.19742			0.128599
4.03128	5.07126	4.64731		0.522941
3.72548	3.49648	3.16928		0.279543
5.94215	8.01439			1.4653
3.60294	4.3271	4.183		0.38333
3.86997	3.83821			0.0224598
3.03907	3.51202	3.28169		0.236502
1.9148	2.17988	2.29839		0.196411
3.75059	3.96645			0.152635
5.26463	5.78167	6.00146		0.378279
1.81454	1.9034	2.14636		0.171773
1.8382	2.0755	2.3449		0.253516
7.75245	7.38762	9.89556		1.35498
4.16464	4.16591	4.04201		0.0711707
2.7954	2.14748	2.87359		0.398568
6.49294	6.75313			0.18398
4.39123	5.79585	4.39893		0.808748
5.5243	6.0297	3.91763		1.10285
3.36684	3.46341			0.0682831
				0.572523

## Sheet: SE_Acc
0.248592	0.340738			0.0651569
0.380686	0.39005	0.346137		0.0231291
0.397496	0.360634	0.339639		0.029289
0.354123	0.379589			0.0180077
0.316815	0.270037	0.293726		0.0233895
0.151497	0.137367	0.0605108		0.0489642
0.360701	0.381777			0.0149027
0.122224	0.191211	0.175085		0.0360867
0.365177	0.312748			0.0370732
0.238882	0.236307	0.188423		0.0284187
0.413163	0.491636	0.446662		0.0393758
0.244678	0.260756			0.011369
0.213922	0.297449	0.200134		0.0526578
0.263147	0.209079	0.187159		0.039111
0.309046	0.286505	0.239743		0.0353501
0.26366	0.378455	0.283728		0.0613104
0.479997	0.502324	0.567547		0.0454927
0.50758	0.261885	0.434623		0.126179
0.146965	0.171212			0.0171454
0.323702	0.274849	0.347636		0.037098
0.210755	0.287874	0.370218		0.0797456
0.354949	0.403321			0.0342044
				0.0480504

## Sheet: SE_Gyr
0.226396	0.369049			0.100871
0.348088	0.342781	0.346925		0.00278967
0.438585	0.353964	0.330153		0.0569869
0.208269	0.206794			0.00104306
0.241381	0.262576	0.258018		0.0111563
0.245085	0.127128	0.076589		0.0864667
0.308029	0.387002			0.055842
0.123437	0.185348	0.164398		0.0314897
0.251991	0.237106			0.0105258
0.268172	0.302391	0.226305		0.0381072
0.311495	0.397163	0.378018		0.0449647
0.223311	0.267942			0.031559
0.25105	0.383147	0.255656		0.0749722
0.150379	0.158053	0.127601		0.015838
0.210306	0.242913	0.231375		0.0165341
0.371871	0.453695	0.378361		0.0454833
0.365707	0.352908	0.389892		0.0187823
0.333023	0.166292	0.310534		0.0904719
0.217167	0.240062			0.0161893
0.335244	0.336407	0.323781		0.00697831
0.185857	0.343146	0.363469		0.0972104
0.19203	0.240488			0.034265
				0.0510834

[truncated: 6 more sheets: CORR_AXY, CORR_AXZ, CORR_AYZ, CORR_GXY, CORR_GXZ, CORR_GYZ]
