# Supplementary material for: Reliability and Discriminative Validity of Wearable Sensors for the Quantification of Upper Limb Movement Disorders in Individuals with Dyskinetic Cerebral Palsy
Source: Sensors (Basel). 2023 Feb 1;23(3):1574. doi: 10.3390/s23031574 (PMC9921560; doi:10.3390/s23031574)
Supplement: Supplementary file 1 [file sensors-23-01574-s001.zip › sensor_parameters_short_hand_RF.xls]

## Sheet: MaxJerk
150.663	46.7663	39.8041	50.838	114.113	109.86	69.9371	139.911		43.8691
39.6551	51.8027	40.8979	40.4781	48.9049	66.6542	40.1988	27.6863		11.4477
51.3082	42.1065	42.486	40.9649	24.5206	50.5823	49.6348	54.1817		9.44835
69.5733	50.5511	52.1626	41.6886	69.0782	22.1639	21.0662	40.1415		18.4757
65.2647	43.4948	61.5637	37.1151	38.7583	72.0068	51.562	47.505		12.8571
30.2042	68.6176	32.7832	30.0521	54.5161	76.057	27.9276	40.7267		18.9515
65.5163	64.4973	63.2584	70.0696	60.2744	42.5845	72.7962	56.589		9.34314
106.573	89.8997	121.13	40.5692	68.7212	120.228	98.5644	75.611		27.6039
65.7821	113.866	80.0935	57.1497	44.2542	33.8613	64.4786	64.1602		24.1344
65.2129	49.18	70.0132	63.5689	77.7584	66.4454	46.4061	74.2182		11.1265
45.3704	60.7912	26.3608	26.5085	94.7004	50.6193	48.5924	20.0857		24.0623
66.0414	90.9687	77.047	74.3765	96.656	62.3752	75.7096	64.1954		12.4134
89.4861	119.646	58.9303	82.2921	72.881	97.5311	115.728	107.37		21.2002
31.8984	49.7099	35.1182	24.1067	51.2992	33.5107	52.205	39.0938		10.3836
0.0918815	0.097029	0.220341	0.17057	0.110377	0.1819	0.110086	0.0948329		0.0491181
75.9547	165.448	64.4399	122.075	87.4004	51.5032	64.7548	66.8204		38.1291
0.254068	0.15573	0.171956	0.290529	0.146626	0.230662	0.0867465	0.158965		0.0663256
0.160002	0.14422	0.173387	0.154065	0.0919645	0.0566773	0.186096	0.135492		0.0432348
46.784	87.4079	82.3187	123.795	97.9608	146.028	92.8731	105.924		29.3799
48.4215	61.7225	40.9956	69.6582	72.7379	37.9613	42.5875	59.5477		13.4912
45.9418	68.781	59.8414	59.3409	51.1959	87.5332	55.229	68.3782		12.9326
									20.6432

## Sheet: MaxAnfJerk
64871	106315	131841	119466	93959.8	190501	82786.4	68283.5		41013.8
326933	69090.9	345575	166941	18966.7	322838	68875.5	92323.4		135090
152774	523438	363991	827113	103755	199626	134181	260461		247205
42092.8	44415.3	90068	36024.3	81505.3	33749.7	65828.2	22513.5		24273.4
318608	315270	142328	350271	282465	186164	235945	250613		70819.9
140014	153540	187082	107414	163690	159483	147254	138519		23041.8
278403	406367	315768	140732	121592	48772	265525	192815		116742
245804	315892	534114	137840	98570.9	262918	241160	180462		133970
192303	29534	208165	209085	86750.5	204378	156945	164421		65527.4
181871	21623.6	57282	29592.3	33099.9	121827	30114.1	30359.7		57931.1
28584.5	170734	90012.3	90094.2	208898	43618.4	22485.3	47240.7		68579.9
96492.6	187637	510304	141054	126687	105015	164552	198394		133991
201197	237200	63010.8	402076	37930.2	56647.2	103892	133467		122388
127136	107336	72959.4	106036	30716.9	56170.3	256683	35648.7		72666.5
5.13509	17.4174	13.5262	8.64664	12.5335	9.07802	12.0383	13.8815		3.79214
81450	238316	64107.8	197256	162666	111677	251392	250742		76590.5
10.8324	14.4226	10.202	13.1974	10.3841	14.3765	12.394	15.8608		2.11119
14.1024	7.83893	10.5229	11.7419	11.8199	9.33168	10.242	7.66764		2.16235
77485.9	29307.8	61587	36295.8	89151.4	56560.9	36305.4	57121		20975.7
107513	216334	54744.6	165813	389438	123677	97777.2	326045		117945
15849.8	144885	85416.2	128243	88223.4	44419.1	50310.1	36241.8		45579.9
									97881.2

## Sheet: MeanAcc
2.0299	1.96778	1.48523	3.28054	2.45649	3.45726	2.83302	2.50355		0.673199
3.25756	2.68241	3.08947	3.74196	2.7357	3.48088	3.49298	2.42537		0.4625
3.6777	3.19435	2.99282	3.31977	3.1757	4.06632	3.47725	3.33308		0.33726
1.32091	1.24763	1.03728	1.05524	1.25158	1.40778	0.822737	1.02074		0.193037
5.05853	3.60304	5.03432	4.36247	4.46793	5.68617	4.54035	4.13474		0.639811
2.56712	2.66673	2.83383	2.45752	2.68965	2.96855	2.60362	2.67052		0.158259
3.01795	2.86104	3.16414	3.09151	2.80226	2.22855	3.58121	2.73726		0.389638
4.50446	2.91409	3.9933	5.75979	3.58066	4.06252	4.33466	4.59899		0.82799
2.34943	2.94846	2.68205	2.8201	2.08564	1.80697	2.11126	1.97055		0.423434
2.7312	1.82052	3.11825	1.78375	2.14441	2.19612	2.80108	2.36501		0.47853
2.03206	2.6619	1.3127	1.57411	2.68959	2.07138	2.54577	1.86585		0.509685
3.69416	4.14962	3.87416	4.08328	3.84509	3.52054	3.59554	3.64588		0.228306
4.3633	5.00984	3.38247	4.41203	4.53326	3.54044	3.67612	3.71694		0.577327
2.42648	1.23864	1.80738	1.11696	1.84794	1.80544	1.90999	1.72465		0.407109
0.112267	0.113515	0.116048	0.113859	0.11269	0.113492	0.113277	0.114684		0.00118507
2.96399	3.60078	3.66438	3.99678	4.48189	2.54594	4.98669	3.40609		0.78611
0.0420451	0.0399209	0.0401795	0.04033	0.0410694	0.0408691	0.0458457	0.0398381		0.0019886
0.0433222	0.0441513	0.0452868	0.0452488	0.0447507	0.0420551	0.0473527	0.0437996		0.00157469
4.55105	4.43702	5.60865	4.95944	6.67812	6.38678	6.14788	5.93363		0.849779
3.98017	4.43984	3.61578	4.08785	4.43893	2.20786	3.96214	4.92091		0.809599
3.03071	2.76238	2.75315	2.96902	3.26741	4.53161	4.17323	3.27191		0.658487
									0.535644

## Sheet: MaxAcc
8.20466	4.57852	3.09819	6.91408	7.06314	8.93477	5.86541	8.7558		2.06426
7.00194	5.10128	10.4146	7.71414	4.58738	6.53988	5.25375	6.93591		1.85585
5.30496	4.99782	11.5728	10.9623	4.46736	5.73732	8.30368	10.488		2.9547
4.87822	4.28005	4.89371	3.64007	4.85249	2.6785	2.80689	3.07688		0.9582
7.72641	9.56908	10.0528	6.96588	9.6353	12.1711	8.56263	11.4324		1.75833
13.3058	15.1523	15.1704	10.6276	13.4652	10.6941	9.39251	8.7976		2.51958
7.17438	7.05855	8.13179	6.29758	6.52269	5.8395	7.28603	6.71674		0.699646
9.27593	7.00283	10.6236	8.93645	9.91779	8.79554	10.8426	11.0588		1.34927
5.77517	7.98441	6.44877	5.97409	4.88698	4.44888	5.10892	4.86309		1.14234
5.08762	4.6061	5.34919	4.33041	6.57592	5.45769	4.33243	5.53253		0.751489
5.61007	6.09457	3.23598	4.06197	7.3225	6.17397	5.13255	4.44477		1.3159
12.2688	13.7583	10.0548	12.0624	12.3321	14.3451	11.9334	13.425		1.33163
10.2885	14.9102	13.4944	12.6175	12.5003	9.02161	11.0711	11.1381		1.87561
4.40805	3.96735	4.58358	1.94748	5.20709	3.95032	4.38627	3.58802		0.963569
0.118608	0.120995	0.126263	0.12218	0.118513	0.119199	0.1171	0.122296		0.00293059
6.85545	10.9365	7.55156	8.92765	7.30164	5.75951	8.29789	7.42063		1.54982
0.0506628	0.0467292	0.0479083	0.0551435	0.0492564	0.05416	0.0522555	0.0487108		0.00301577
0.0481606	0.0525267	0.0541573	0.052402	0.0522296	0.04506	0.0560258	0.0498834		0.00348221
9.45077	7.92719	10.3126	8.94483	13.0952	12.364	8.56315	11.0564		1.84358
6.31822	8.70922	7.18099	11.5719	10.1357	5.46857	5.63684	9.0569		2.21782
6.21509	5.87745	6.16584	5.22358	6.50976	10.7958	9.79634	7.10985		1.99461
									1.63742

## Sheet: MeanGyr
126.679	127.061	89.8078	201.193	171.396	172.241	163.735	161.636		34.9833
126.316	109.685	142.414	126.161	116.926	143.053	123.25	102.17		14.3611
126.47	117.387	104.843	121.898	112.824	173.855	102.505	103.443		23.3384
59.9967	60.8901	55.6213	50.194	64.5775	57.419	51.752	52.768		4.99161
123.432	96.4129	134.551	113.972	115.749	134.791	124.01	115.679		12.4645
73.2452	63.6347	73.8563	67.9085	75.6841	70.1729	78.3939	84.497		6.43047
138.904	140.368	141.421	139.913	83.4092	87.5665	142.096	112.862		25.2687
102.87	109.898	98.2783	149.577	114.994	111.499	122.621	96.9494		16.9973
132.162	144.181	98.9853	138.602	96.979	104.282	110.386	111.965		18.4824
76.3	58.866	79.6577	73.2254	74.812	66.4114	87.2281	68.6645		8.64201
52.6477	64.117	46.9621	49.203	69.6385	68.3076	72.6816	49.0782		10.6423
81.5308	130.726	119.159	107.098	92.2985	97.1097	136.12	113.685		18.9248
170.284	170.793	166.973	171.956	175.328	154.13	146.85	165.207		9.76702
81.0769	50.5176	107.047	56.2236	67.5579	80.7728	62.3577	75.1852		17.8007
0.537798	0.530939	0.521745	0.527481	0.530311	0.529849	0.529394	0.538203		0.00534354
113.927	138.219	156.427	159.656	162.403	147.771	190.566	129.178		23.3365
0.548528	0.546657	0.543732	0.556641	0.546308	0.540387	0.549216	0.551106		0.00487927
0.531622	0.525986	0.526624	0.521483	0.524287	0.506131	0.52525	0.52675		0.00757726
134.966	123.235	141.923	148.185	145.93	150.743	163.276	183.284		18.1392
133.829	141.461	102.677	110.893	143.645	70.7887	114.012	123.77		23.9673
75.0633	92.7619	81.7211	106.332	85.4852	104.273	102.397	91.0235		11.3355
									17.3209

## Sheet: MaxGyr
364.918	443.061	272.032	373.536	303.649	515.281	369.008	379.834		75.6975
250.274	173.428	305.534	253.312	186.564	267.645	256.584	203.327		45.0093
230.52	263.367	176.121	320.801	180.59	341.666	224.22	181.582		64.1118
175.397	120.137	109.892	110.182	158.893	125.29	141.277	101.341		26.0771
265.195	186.14	236.311	226.998	228.664	261.804	218.012	205.896		26.5495
133.278	135.185	127.761	118.227	172.431	132.727	139.123	143.102		15.8838
434.043	382.987	358.379	501.502	187.072	233.63	292.085	253.423		107.482
252.288	345.209	307.161	285.087	285.287	239.2	368.608	230.553		49.4244
275.523	352.515	233.377	221.768	245.361	227.118	288.292	228.831		44.7715
135.119	114.72	154.417	121.347	170.449	123.256	141.764	138.662		18.4381
127.669	119.134	146.425	83.3891	201.752	158.098	155.927	108.023		36.2583
151.743	223.505	202.623	262.238	167.693	183.424	232.355	174.461		37.3759
494.934	514.927	403.377	483.804	371.293	384.367	373.044	364.685		62.9788
180.483	154.16	189.559	140.956	155.973	226.272	140.135	187.863		29.5963
0.549217	0.552118	0.541594	0.546425	0.549971	0.556531	0.555999	0.570868		0.00876784
195.642	411.348	324.716	287.877	296.949	309.953	346.503	257.961		63.2064
0.568642	0.580875	0.585077	0.60529	0.583311	0.567957	0.577178	0.588619		0.011937
0.565914	0.547159	0.55481	0.548864	0.547511	0.522076	0.54865	0.537168		0.0127684
319.741	237.711	277.239	221.758	323.011	238.233	258.55	364.536		50.6647
204.461	220.672	210.059	223.774	232.492	174.69	247.345	230.931		22.042
178.705	217.827	181.248	203.015	216.002	214.932	192.883	197.198		15.4416
									47.2669

## Sheet: RMSAcc
2.57235	2.37613	1.65302	3.78218	2.88679	3.83035	3.09028	3.12434		0.723642
3.45412	2.85464	3.47755	4.2962	2.93556	3.82583	3.60768	2.58407		0.562145
3.83059	3.37396	3.38611	3.65057	3.31486	4.23876	3.72225	3.57219		0.304056
1.60291	1.47792	1.3806	1.22601	1.4823	1.55615	1.03023	1.21083		0.198124
5.37628	3.8991	5.32591	4.61742	4.64217	5.96165	4.80873	4.5222		0.636312
3.38388	3.51408	3.8391	2.97121	3.28516	3.34933	2.97192	2.97292		0.308753
3.62651	3.36656	3.89441	3.54912	3.22781	2.71864	4.0703	3.21007		0.426203
5.18675	3.48864	5.11294	5.92487	4.4816	4.714	5.37773	5.4325		0.742355
2.87307	3.52552	3.10067	3.12898	2.38417	2.08911	2.38477	2.2956		0.505358
2.88873	2.03885	3.36095	1.95017	2.55607	2.40904	2.96792	2.61806		0.474139
2.40152	2.93922	1.55639	1.73225	3.00879	2.49176	2.85671	2.20891		0.544122
4.41101	4.91622	4.39829	4.89653	4.62568	4.36013	4.36775	4.35263		0.241969
5.20572	6.66752	4.30154	5.55147	5.25196	4.04801	4.66904	4.49394		0.840563
2.56696	1.58158	2.0687	1.18254	2.26195	2.0559	2.13613	1.89661		0.42471
0.11234	0.113617	0.116113	0.113939	0.11273	0.11357	0.1133	0.114734		0.00118631
3.34862	4.44654	4.24419	4.49374	4.88994	2.8259	5.33462	4.0111		0.807209
0.0423138	0.0400899	0.0403973	0.040819	0.0412202	0.0412964	0.0459447	0.0401172		0.00193141
0.0434574	0.0443135	0.0455361	0.0454023	0.0449898	0.0420919	0.047588	0.0440496		0.0016271
5.00802	5.03519	6.34726	5.12721	7.69317	6.75135	6.46992	6.57398		0.97485
4.10982	4.55654	3.84344	4.41271	4.61905	2.58296	4.06589	5.10922		0.749424
3.33724	3.15633	3.09731	3.2233	3.63536	5.34764	4.94098	3.516		0.866598
									0.584834

## Sheet: RMSGyr
148.606	174.904	111.278	233.502	186.575	207.367	185.456	179.248		36.641
134.629	113.661	164.106	139.356	121.446	153.625	133.672	112.212		18.3871
132.433	128.365	112.878	138.667	118.841	190.132	117.927	109.992		25.7813
72.7982	67.4	58.5057	54.9898	71.8628	64.6598	59.3614	58.636		6.6665
142.313	109.766	147.93	129.785	130.464	157.83	138.593	127.674		14.5928
81.7565	73.6219	84.7846	76.5279	89.7514	81.4143	89.2395	91.8289		6.50836
169.567	168.867	169.384	173.866	95.3372	106.581	159.224	130.816		31.4498
119.56	131.236	127.436	160.917	133.628	128.107	151.641	117.298		15.1572
146.429	168.751	108.462	145.514	108.404	117.494	126.346	124.281		21.1826
80.9857	67.1717	86.926	78.8747	88.464	72.1832	92.9267	78.3058		8.56258
64.2766	70.3463	58.2222	53.4592	80.1236	79.6789	84.001	58.1678		11.7121
89.0376	143.592	127.869	124.624	100.541	104.128	146.733	123.057		20.5394
209.162	206.714	189.334	202.785	192.056	179.496	169.237	188.931		13.7218
94.7856	62.7282	117.812	64.4742	80.7706	97.2849	72.8716	93.0967		18.7821
0.537844	0.531072	0.521937	0.527599	0.530444	0.529974	0.529581	0.538546		0.00535522
125.497	172.509	182.934	173.581	179.001	158.862	213.633	148.661		25.9879
0.548587	0.546975	0.54398	0.556872	0.546417	0.540495	0.549416	0.551306		0.00489945
0.531791	0.526065	0.526824	0.52172	0.524591	0.506238	0.525368	0.526815		0.00758688
159.421	137.554	158.206	153.853	170.031	162.468	173.91	207.053		20.1196
144.377	150.23	116.257	122.694	150.989	85.9739	129.284	135.717		21.6059
88.6502	108.971	96.2977	117.464	106.065	118.423	114.421	102.147		10.5087
									18.899

## Sheet: SE_Acc
0.2488	0.329347	0.515127	0.365114	0.39668	0.466045	0.575896	0.287486		0.113557
0.442697	0.302834	0.369163	0.169076	0.37969	0.594448	0.49481	0.373146		0.126934
0.513995	0.400825	0.333284	0.410563	0.433099	0.414338	0.468911	0.33862		0.0606648
0.37131	0.317048	0.206562	0.256337	0.312848	0.409263	0.307715	0.304721		0.0624248
0.440922	0.434664	0.341303	0.481498	0.412473	0.484188	0.441505	0.36179		0.0513696
0.226192	0.257921	0.200265	0.268171	0.262127	0.413519	0.369317	0.342446		0.0743113
0.229758	0.230129	0.204669	0.242367	0.508275	0.220253	0.387328	0.309583		0.106308
0.443751	0.397172	0.277793	0.56722	0.171384	0.41738	0.304088	0.262576		0.125011
0.382331	0.366656	0.440151	0.550416	0.533465	0.478285	0.520128	0.433539		0.0689554
0.308647	0.279758	0.301278	0.459779	0.193026	0.239216	0.315935	0.361944		0.0800008
0.405924	0.383249	0.418289	0.514838	0.39428	0.394487	0.442454	0.244172		0.0755788
0.105484	0.244665	0.234596	0.291706	0.271767	0.221042	0.238411	0.265855		0.0568061
0.343223	0.168739	0.215915	0.286972	0.35488	0.359763	0.294534	0.218578		0.0721939
0.33713	0.350554	0.394883	0.582634	0.28483	0.371942	0.443101	0.465561		0.0924808
0.19671	0.431441	0.214657	0.389465	0.487478	0.388174	0.642885	0.498991		0.147867
0.400045	0.172169	0.395767	0.401566	0.39803	0.360109	0.523248	0.399894		0.0970501
0.531982	0.468792	0.541637	0.381817	0.3127	0.495688	0.441675	0.48922		0.0776092
0.395173	0.454255	0.414515	0.592504	0.207395	0.589469	0.328604	0.379932		0.128428
0.367593	0.247064	0.271002	0.384412	0.311572	0.243622	0.20921	0.341693		0.0638745
0.438722	0.237532	0.294113	0.220824	0.230276	0.190704	0.369747	0.155485		0.0951587
0.467493	0.213657	0.579573	0.459232	0.525424	0.258372	0.320992	0.347168		0.130799
									0.0973594

## Sheet: SE_Gyr
0.23938	0.100671	0.208803	0.239864	0.352878	0.231512	0.286535	0.32617		0.0776889
0.493087	0.648695	0.497403	0.4669	0.236389	0.518072	0.373242	0.296868		0.132489
0.314852	0.337257	0.387472	0.386685	0.417253	0.394345	0.436991	0.445253		0.0454645
0.255369	0.249397	0.292281	0.226216	0.149199	0.30335	0.196677	0.278761		0.0517731
0.505285	0.36137	0.387338	0.554608	0.464306	0.3348	0.345033	0.451007		0.0805885
0.265883	0.370438	0.33353	0.345473	0.390336	0.303823	0.326822	0.295092		0.0406084
0.382195	0.376597	0.265803	0.278826	0.447767	0.255371	0.438634	0.298706		0.0779246
0.427444	0.397934	0.209154	0.352355	0.280093	0.398687	0.425079	0.286736		0.0801532
0.419039	0.22982	0.572167	0.642272	0.390278	0.396336	0.420214	0.465757		0.124441
0.368908	0.294259	0.392149	0.389913	0.222764	0.35889	0.420535	0.337649		0.0634733
0.228753	0.415538	0.213545	0.343809	0.463285	0.267559	0.327739	0.299311		0.0871135
0.440057	0.454736	0.472476	0.474208	0.249216	0.626061	0.419854	0.432864		0.102546
0.443931	0.170237	0.406751	0.273347	0.442644	0.230371	0.378489	0.282931		0.103351
0.304134	0.324084	0.359873	0.357389	0.163481	0.192474	0.332523	0.279551		0.0738875
0.436102	0.433523	0.439598	0.311836	0.606136	0.285882	0.517105	0.376993		0.104308
0.325333	0.241611	0.30964	0.330664	0.428831	0.245528	0.410915	0.333232		0.0672785
0.534082	0.45639	0.488214	0.478383	0.445398	0.528113	0.514826	0.323447		0.0677744
0.374213	0.480973	0.386773	0.453197	0.235829	0.439833	0.332202	0.221403		0.0969284
0.232644	0.239363	0.228331	0.339437	0.23194	0.175633	0.266673	0.372818		0.0645415
0.255291	0.248032	0.193833	0.409379	0.375006	0.277281	0.243194	0.252453		0.0726212
0.220939	0.210216	0.282548	0.18557	0.242898	0.136618	0.186751	0.288146		0.0512914
									0.0849122
