# Supplementary material for: Reliability and Discriminative Validity of Wearable Sensors for the Quantification of Upper Limb Movement Disorders in Individuals with Dyskinetic Cerebral Palsy
Source: Sensors (Basel). 2023 Feb 1;23(3):1574. doi: 10.3390/s23031574 (PMC9921560; doi:10.3390/s23031574)
Supplement: Supplementary file 1 [file sensors-23-01574-s001.zip › sensor_parameters_short_hand_RGV.xls]

## Sheet: MaxJerk
101.02	50.3967	29.7289	60.4609	39.9532	47.3093	53.7377	24.8843		23.5115
35.6362	67.5347	33.5642	46.9728	30.9066	45.0296	40.8706	66.0748		14.0639
24.4495	60.6652	97.4281	49.0802	27.5554	44.5411	37.2188	42.2768		23.109
21.8278	35.7288	34.2789	27.1325	27.0948	16.844	40.3301	12.744		9.56199
64.0352	75.2801	43.7778	37.0744	39.0963	53.4224	53.6519	32.4072		14.6146
30.2751	45.6333	35.0396	35.3419	40.9414	19.4786	35.6791	35.0647		7.66605
50.819	38.2041	43.8766	48.3666	54.3336	44.1974	39.9953	40.1211		5.72278
71.9551	64.6381	36.3045	97.7813	93.159	67.2917	55.7898	76.3364		19.7274
80.2303	108.175	70.9267	70.7345	50.8384	71.5256	68.8472	115.405		21.5831
44.1179	38.6065	70.214	32.3537	30.2817	28.7546	131.889	27.5628		35.7212
38.9743	35.7262	38.2291	58.3206	51.1165	54.3764	79.0641	85.4962		18.689
40.4107	37.7984	62.4761	53.5337	44.3738	38.3239	35.8943	36.4854		9.54101
35.0264	83.1658	39.009	38.5011	62.7636	31.215	31.221	38.4977		18.4077
52.1585	61.0308	35.5618	90.8623	72.8329	29.6584	18.7809	30.5888		24.7328
0.17334	0.205363	0.122555	0.113517	0.154198	0.145479	0.143529	0.210198		0.0354899
115.941	61.997	67.3827	160.373	60.0113	89.8929	133.546	44.8584		40.9352
0.146485	0.121458	0.193849	0.246346	0.178477	0.142213	0.231904	0.209179		0.0447337
0.199498	0.130643	0.122019	0.212428	0.161215	0.162057	0.217129	0.155232		0.0360574
102.483	77.674	86.2205	47.9912	49.8832	42.7973	78.9409	112.712		25.9759
63.0464	88.0994	50.3427	61.4323	54.7801	22.0999	55.6647	79.1038		19.777
8.44687	4.75942	9.014	14.7386	6.67793	8.78323	4.62508	8.86988		3.18898
									19.9434

## Sheet: MaxAnfJerk
128171	191232	83569.1	59568.9	140030	84125.8	41419.8	117977		48351.7
187255	116453	98961.5	67887.2	222400	204198	142022	165965		53924.9
58955.1	95056.2	194351	179300	163191	350950	216350	95176.3		91929.9
15702.3	105742	28076	21972.3	27126.1	17034.4	14674.9	33705.9		30147.5
92669.5	209041	128067	50893.5	60800.5	276239	144342	52419.2		81258
126194	24453.5	136211	53640.3	86334	49484.9	51312.9	78825.3		39149.5
79989.9	179097	301559	231448	207357	131480	90137.6	386667		105423
157300	131300	139242	167196	126454	170706	39211.5	66809		47663.9
254064	205139	93564.2	85463.8	175307	154876	184531	138494		56269
136541	71134.4	229294	23455.2	24566.6	40708.3	447526	30984.2		148456
64817.2	71889.5	115059	294757	55134.8	35408.4	138512	231007		92335.8
128395	253919	60731.9	59202.2	345379	172457	447509	289528		139047
65059.6	80160.2	75856.6	60442.5	270892	31273.6	351597	51419.3		118920
82593.4	105225	67401.3	60167.8	288413	42978.5	47981.6	77705.6		80034.5
11.0477	16.7656	7.51681	13.4595	12.3076	14.9924	15.9656	14.0614		2.97797
105732	220936	153970	141952	156684	358382	170468	152749		77882
17.8824	14.9834	13.1046	14.7862	15.7378	17.137	12.3561	17.3657		2.00854
13.2217	15.9817	15.4733	15.0328	14.5721	16.9925	9.11763	11.4862		2.59691
86040.1	110047	175993	62204.1	48608.9	30938.2	61319.7	91348.7		45123.7
69190.8	261440	257938	110179	124414	275111	147511	239358		81346.3
6797.49	2730.75	5627.2	9333.33	8991.17	11367.6	11761.2	6067.47		3084.62
									78888.7

## Sheet: MeanAcc
2.49474	2.56473	2.90865	2.65711	2.88348	3.75267	2.19073	2.22767		0.497027
2.16342	3.39883	2.04196	2.75909	2.50994	2.62659	2.47709	2.27683		0.423677
2.37678	4.79929	3.48296	2.57749	2.18941	3.15237	3.10651	3.14965		0.816315
0.752328	1.0398	1.11061	0.974064	0.842968	1.06628	0.905131	0.754505		0.139256
3.1444	3.76678	3.24189	2.98376	3.35467	3.20275	2.72428	3.19021		0.298369
2.1179	2.33912	2.29767	2.288	2.22148	1.55769	2.17577	2.12082		0.249076
1.96882	2.36479	2.09636	1.83654	2.33048	2.03678	1.56728	1.86527		0.263349
2.53378	3.60085	2.25822	4.44377	2.91095	2.02544	2.70527	3.00062		0.77678
1.75338	3.4129	2.39068	2.75791	1.77984	1.99249	2.3552	2.72808		0.564736
1.41904	2.95876	2.15182	1.27173	1.41319	1.83799	3.60809	1.25901		0.871367
1.89746	1.91112	1.51164	2.05715	1.7426	2.53259	1.90675	2.28659		0.315762
2.64749	2.84945	3.46286	4.0409	2.58716	2.49988	2.15469	2.73285		0.599984
2.29614	2.67037	2.41811	2.70317	3.11571	2.15068	2.90363	2.24899		0.340904
2.13679	1.83382	1.65496	1.56415	1.53609	1.10038	1.13328	0.97826		0.398617
0.11373	0.11314	0.112304	0.11389	0.115326	0.116923	0.115488	0.11922		0.00224964
3.71222	2.3442	3.02	3.88839	2.80134	3.93388	4.41072	2.36509		0.780622
0.0412914	0.0385024	0.0413656	0.0416254	0.0371364	0.0436269	0.0409247	0.0409846		0.00199547
0.0442612	0.0454355	0.0462171	0.0482221	0.0463487	0.0468061	0.0458955	0.0480803		0.00131492
5.3059	4.02197	4.33496	4.51659	3.84501	3.31253	4.92603	3.35154		0.710506
3.89464	4.60192	4.49031	3.85708	4.33955	3.81531	4.18058	3.48531		0.382833
0.38194	0.40243	0.353301	0.443707	0.436002	0.393584	0.348804	0.348182		0.0378106
									0.500565

## Sheet: MaxAcc
7.50682	6.72046	5.64225	5.2415	4.93567	7.87065	4.13281	3.90165		1.48757
12.8866	6.87558	3.20223	4.65777	3.59886	7.78365	5.85665	7.54694		3.08805
5.82133	8.60051	7.9011	4.03748	4.5913	9.87463	5.91719	6.27744		2.00677
1.92603	3.10771	2.76185	2.34476	2.31354	2.35493	2.33474	1.95875		0.390379
12.4309	15.1792	5.77244	5.18443	14.9548	6.24478	11.9408	5.80824		4.35913
6.35345	8.03971	8.09823	8.9071	9.82436	2.94568	8.189	9.38909		2.19578
5.58302	5.72538	6.6331	5.49691	7.38266	5.81765	4.11309	6.15047		0.947226
5.25069	8.21704	5.33481	9.33034	5.56784	5.91325	6.87537	6.35722		1.47175
7.29816	8.63272	6.38011	8.66482	5.03433	6.98718	7.11415	6.16995		1.2228
3.35548	5.72363	7.46743	6.43197	3.34364	3.34575	11.4575	3.1548		2.91943
4.31731	4.63664	3.03104	5.41292	5.82293	7.28576	5.40526	5.78709		1.25187
6.54811	10.3528	8.63575	10.6001	6.16695	4.12283	3.9519	6.94742		2.53906
4.34104	5.90831	7.55335	8.18832	5.75206	3.82318	7.04121	4.26661		1.63412
4.75117	7.43677	4.48725	6.56357	7.4275	3.01893	2.91	3.06569		1.95009
0.1209	0.124659	0.121196	0.120583	0.124623	0.123142	0.12484	0.132124		0.00373054
9.47819	4.4479	6.71779	11.0722	7.68401	8.48388	11.1838	4.65955		2.60506
0.0537581	0.0469051	0.0511452	0.0569518	0.0466386	0.051951	0.0498356	0.050939		0.00340386
0.0521558	0.0533874	0.054221	0.0541317	0.0553632	0.0589442	0.0591774	0.0548654		0.00252353
14.4059	9.92244	9.62515	10.2541	7.04673	8.10956	11.2888	8.51659		2.25812
7.94685	8.99934	8.90987	9.23175	7.82857	6.12154	7.29248	9.2965		1.11837
0.751052	0.780221	0.827716	1.42572	0.911258	0.865598	0.600875	0.865151		0.240959
									2.00643

## Sheet: MeanGyr
165.288	139.389	154.893	136.454	184.942	175.288	171.523	125.682		21.0833
90.9677	115.547	94.2736	126.583	121.002	93.8996	117.349	110.199		13.8185
117.683	101.669	150.013	113.422	99.9934	126.373	91.0954	96.6898		19.3024
51.8132	72.2512	70.6104	60.7163	63.8574	59.5927	53.2078	62.2678		7.27921
85.2373	93.3403	92.8189	98.5843	79.3996	96.7593	83.8893	103.828		8.26419
89.2329	79.6527	80.8847	83.7638	85.6529	83.4134	85.5815	80.1865		3.26265
90.7383	106.445	105.721	91.4205	95.8154	92.9694	97.6387	98.8695		6.04175
83.3766	158.63	100.174	127.807	95.2789	76.5317	109.97	98.9452		26.2928
89.8245	129.905	93.4164	95.069	92.5789	84.6875	107.368	95.0626		14.22
52.4157	109.282	72.8697	50.3808	87.2717	76.3026	107.919	59.2641		23.1414
62.4729	53.7063	53.3069	76.3445	39.3224	56.4925	60.6108	64.4493		10.6611
129.088	158.768	128.646	150.644	125.003	122.409	144.495	129.149		13.4133
108.457	121.826	128.901	105.147	123.951	102.578	152.088	110.353		16.3561
110.694	74.5813	94.0919	61.6693	54.8341	84.7115	84.6674	42.232		22.2891
0.529142	0.535373	0.536719	0.527113	0.539254	0.530827	0.524508	0.530627		0.00502813
112.786	110.545	125.146	107.053	121.227	144.155	136.43	118.746		12.8711
0.5508	0.544753	0.550022	0.559276	0.548609	0.5556	0.541667	0.534029		0.00795493
0.515758	0.516719	0.519834	0.51615	0.527021	0.522518	0.525005	0.52677		0.00475381
117.069	114.535	162.312	149.129	100.34	147.448	142.311	102.835		23.5674
132.428	167.524	166.588	109.66	161.14	126.066	127.681	107.565		24.5829
17.1474	13.1629	14.1273	12.975	13.1673	16.5517	14.6192	13.3705		1.62306
									15.7979

## Sheet: MaxGyr
395.863	322.028	299.722	242.931	404.31	315.301	393.768	284.64		59.4236
315.708	280.02	230.747	292.576	248.286	302.431	258.67	343.158		37.2003
270.942	193.326	458.131	209.959	225.445	313.347	189.545	194.448		92.2332
133.228	131.669	187.805	160.179	128.289	127.781	108.282	120.078		25.1645
138.212	238.764	170.751	190.529	142.557	163.988	180.594	183.065		31.4861
177.422	158.905	151.143	167.077	158.255	148.042	169.777	149.28		10.6222
239.424	319.132	343.779	301.319	299.548	216.966	299.945	248.725		43.6339
212.075	404.509	196.33	485.393	207.983	193.319	338.801	205.342		114.038
359.343	298.823	218.592	258.908	310.514	248.775	410.3	234.15		66.1348
223.796	271.008	200.887	101.807	154.397	146.786	307.369	146.466		69.9738
124.41	116.551	129.465	195.119	94.6107	147.431	173.341	168.692		33.5573
232.919	277.603	308.804	318.719	237.008	202.547	388.652	274.573		58.8379
273.574	286.187	229.535	147.903	363.155	177.713	331.547	255.238		72.5937
287.16	261.369	231.51	148.391	251.157	277.62	297.883	149.184		58.8604
0.561342	0.569753	0.551781	0.561841	0.559227	0.574226	0.550239	0.566684		0.00830088
257.389	228.291	210.008	252.241	347.049	328.105	322.202	237.377		51.8939
0.581373	0.577535	0.598905	0.607253	0.57785	0.597897	0.580925	0.572568		0.0126518
0.545158	0.546446	0.553698	0.542447	0.55376	0.553989	0.551683	0.548534		0.0044646
394.636	284.922	448.753	401.701	213.617	313.363	333.443	289.1		76.3117
257.779	289.529	340.832	243.029	270.125	194.192	234.281	267.773		42.7875
30.1194	31.8523	38.5797	40.6463	30.4793	40.181	47.5385	25.355		7.30089
									56.1521

## Sheet: RMSAcc
2.97292	3.04138	3.10587	2.97746	3.10647	4.22543	2.39177	2.34805		0.575522
2.80908	3.79476	2.20015	2.97623	2.61983	3.05877	2.7727	2.84757		0.451235
2.65026	5.31664	3.95112	2.71951	2.42021	3.47265	3.356	3.46121		0.923554
0.861365	1.23983	1.28646	1.0933	0.973622	1.18186	1.0292	0.858681		0.163765
3.74507	4.52251	3.45209	3.2491	4.00938	3.4841	3.37639	3.50254		0.417644
2.36106	2.59692	2.66245	2.72353	2.64325	1.68606	2.58394	2.54126		0.336312
2.38267	2.85464	2.60396	2.41295	3.17939	2.48396	1.86008	2.38341		0.385376
2.78183	4.32105	2.65177	5.29815	3.1496	2.3772	3.35035	3.45986		0.963894
2.33252	4.04539	2.79398	3.585	2.09076	2.49926	2.84202	3.11413		0.652224
1.65031	3.20332	2.4693	1.4743	1.54948	2.02721	4.22758	1.48703		0.996466
2.07814	2.15489	1.69017	2.30447	2.20168	2.90011	2.1792	2.62344		0.362969
2.85374	3.37449	3.78413	4.46811	2.85235	2.62261	2.3199	3.04274		0.691092
2.59486	2.96289	2.72708	3.14331	3.42285	2.2848	3.36423	2.48224		0.417838
2.5304	2.41648	2.02733	2.03889	2.2608	1.36057	1.29164	1.39436		0.499255
0.113809	0.113236	0.112372	0.113963	0.115406	0.117008	0.115557	0.119351		0.00226426
4.2875	2.56744	3.4381	4.60517	3.29401	4.40145	5.05054	2.63706		0.931083
0.0416397	0.0386527	0.0416663	0.042003	0.0373543	0.043872	0.0411722	0.041275		0.00203529
0.044453	0.0455473	0.0463466	0.0483792	0.0465453	0.0471	0.0462641	0.0482648		0.00131386
6.9098	4.95136	5.48917	5.53413	4.13895	4.13034	6.11239	4.38689		0.995973
4.21709	4.9947	4.72818	4.29779	4.53478	4.01219	4.41075	4.2202		0.316331
0.418097	0.424966	0.383181	0.518727	0.462927	0.434903	0.364567	0.398677		0.0484888
									0.599691

## Sheet: RMSGyr
192.466	168.519	175.18	149.951	204.405	194.521	193.55	146.517		21.702
116.696	133.605	114.595	146.202	138.031	117.698	138.387	138.453		12.2227
139.019	117.142	185.487	126.449	113.398	144.517	102.566	113.037		26.3613
60.5355	78.957	79.7945	70.3026	69.5658	67.6134	58.8767	68.0508		7.50499
92.0524	103.639	101.224	105.294	85.9108	105.331	93.4989	110.718		8.36066
98.7811	94.2336	93.6447	95.7818	96.8558	91.3599	99.6031	90.3132		3.31964
108.518	126.881	131.805	114.392	118.078	105.118	116.936	113.501		8.86473
99.3293	189.182	113.192	170.62	108.272	89.9855	141.866	114.855		35.4542
124.943	147.078	106.682	112.1	112.617	101.621	139.314	103.891		16.9241
68.6867	134.194	84.2287	57.3992	95.6947	83.8754	123.074	72.0701		26.6959
71.2119	61.21	60.6767	89.3588	48.0993	64.3354	70.8858	74.0344		12.061
141.902	170.758	153.859	175.734	140.605	133.537	171.448	153.412		15.999
129.684	146.266	146.515	109.202	155.99	111.45	179.882	128.774		23.6199
138.56	101.085	117.052	75.5365	81.8442	111.366	106.674	61.0464		25.0491
0.529556	0.535685	0.536793	0.527332	0.53941	0.531081	0.524703	0.530833		0.00499468
131.21	126.539	138.908	128.594	159.611	171.262	164.012	130.931		18.0867
0.550989	0.544954	0.550265	0.559588	0.548852	0.555826	0.541857	0.534205		0.00798943
0.515894	0.516894	0.520086	0.516328	0.527163	0.522745	0.525122	0.526931		0.00474407
157.504	139.219	200.779	184.641	116.234	166.291	168.144	127.622		28.6109
148.625	184.915	185.332	133.616	170.237	139.955	144.086	134.981		21.6823
19.1612	15.1906	16.8216	16.2806	15.323	19.7361	18.9972	15.0044		1.95414
									18.6998

## Sheet: SE_Acc
0.452282	0.262268	0.384461	0.358398	0.401417	0.291425	0.572701	0.4479		0.0981835
0.228664	0.34393	0.348307	0.309422	0.411099	0.314673	0.423323	0.314811		0.061651
0.338774	0.415221	0.470726	0.325754	0.395826	0.40709	0.53291	0.453034		0.0682574
0.424007	0.374038	0.362284	0.547617	0.384953	0.480381	0.511796	0.301261		0.0837161
0.421126	0.399075	0.478687	0.322083	0.368334	0.536801	0.309305	0.336472		0.079812
0.416894	0.448455	0.318897	0.385884	0.48198	0.467558	0.301598	0.405465		0.0658119
0.393419	0.448744	0.188929	0.28516	0.254512	0.276304	0.428892	0.26347		0.0937756
0.506693	0.361426	0.314655	0.313712	0.39138	0.460672	0.199634	0.272442		0.0998444
0.294092	0.259873	0.475375	0.289106	0.407111	0.333471	0.349535	0.550831		0.100972
0.468768	0.375583	0.539359	0.428927	0.51057	0.412775	0.463131	0.401958		0.0558747
0.418835	0.51193	0.383676	0.527105	0.290786	0.45393	0.511513	0.462341		0.0795097
0.411245	0.339905	0.47082	0.295981	0.493814	0.278442	0.427264	0.385145		0.078312
0.401127	0.517056	0.202613	0.302433	0.454736	0.458746	0.348793	0.46695		0.103822
0.447685	0.256219	0.391831	0.255714	0.104103	0.227635	0.354519	0.0751475		0.131452
0.453598	0.494889	0.466189	0.53571	0.508184	0.484911	0.518261	0.463807		0.028891
0.424883	0.486192	0.449227	0.233061	0.238061	0.391207	0.269108	0.440105		0.103091
0.461185	0.408324	0.510826	0.503373	0.453723	0.506988	0.512107	0.581692		0.0515101
0.512696	0.601015	0.575074	0.456451	0.394917	0.43215	0.411519	0.478852		0.0750836
0.159126	0.209319	0.167812	0.163325	0.450049	0.239126	0.214444	0.170654		0.0967216
0.378066	0.360707	0.387045	0.378242	0.24018	0.324661	0.573221	0.243921		0.10415
0.450862	0.486506	0.457769	0.217466	0.491061	0.479118	0.509247	0.385245		0.0954841
									0.0887344

## Sheet: SE_Gyr
0.312244	0.262364	0.399087	0.366952	0.359555	0.499718	0.254958	0.375222		0.0791608
0.353236	0.330242	0.322724	0.321734	0.336472	0.253643	0.413764	0.252716		0.0522879
0.244871	0.263815	0.325299	0.377577	0.350579	0.431082	0.481247	0.292171		0.0818152
0.299319	0.27062	0.330262	0.315476	0.382369	0.260846	0.268544	0.309834		0.0400877
0.349544	0.520714	0.219162	0.304211	0.496774	0.314988	0.378618	0.294344		0.103009
0.456858	0.30054	0.251717	0.370294	0.333384	0.23993	0.285216	0.419751		0.0782473
0.290764	0.40399	0.209754	0.264206	0.244493	0.412259	0.352264	0.300399		0.073656
0.460658	0.287118	0.298179	0.24637	0.379602	0.356132	0.155086	0.302486		0.0913653
0.0862477	0.332468	0.351833	0.285668	0.309649	0.295829	0.213972	0.448375		0.105858
0.263117	0.198019	0.49497	0.318483	0.231043	0.399268	0.470375	0.12177		0.133278
0.274685	0.300134	0.483853	0.513462	0.22261	0.318315	0.41993	0.380391		0.10298
0.280689	0.497696	0.345107	0.201656	0.35404	0.430571	0.447092	0.279138		0.099601
0.388424	0.327147	0.170749	0.35708	0.301261	0.360543	0.374962	0.314279		0.0689553
0.174859	0.161797	0.195554	0.260692	0.0926189	0.102317	0.205584	0.120565		0.0573001
0.320585	0.542445	0.460525	0.482215	0.544727	0.49774	0.505285	0.53509		0.0732703
0.488271	0.378023	0.314115	0.236503	0.162883	0.384987	0.250803	0.472964		0.115708
0.529715	0.507066	0.324285	0.442973	0.410229	0.530796	0.516918	0.404389		0.0751971
0.405465	0.34695	0.390458	0.560658	0.380147	0.543488	0.488537	0.51961		0.0829692
0.0929987	0.297561	0.225734	0.181048	0.289802	0.296113	0.191468	0.213079		0.0708377
0.268112	0.224024	0.52897	0.225807	0.503905	0.123162	0.361947	0.174188		0.149868
0.113765	0.208871	0.155172	0.107723	0.30101	0.239912	0.112532	0.270265		0.0768989
									0.0922028
