# Supplementary material for: Reliability and Discriminative Validity of Wearable Sensors for the Quantification of Upper Limb Movement Disorders in Individuals with Dyskinetic Cerebral Palsy
Source: Sensors (Basel). 2023 Feb 1;23(3):1574. doi: 10.3390/s23031574 (PMC9921560; doi:10.3390/s23031574)
Supplement: Supplementary file 1 [file sensors-23-01574-s001.zip › sensor_parameters_short_hand_RS.xls]

## Sheet: MaxJerk
35.6122	40.8566	65.1573	142.395	40.7095	39.0258	47.5317	24.7242		37.3148
34.3752	24.5576	53.4163	86.704	49.0596	50.6996	57.5236	45.8668		18.2238
66.675	44.7635	71.9533	73.0163	66.6036	95.2201	63.4119	87.5551		15.3504
83.7407	33.0719	67.4267	48.1838	77.9255	34.0383	50.5455	71.6715		19.5741
38.3565	67.5775	40.9759	51.35	48.1204	41.8794	45.6847	43.3283		9.22606
16.4814	59.5188	32.8875	31.4233	21.6062	92.5731	62.6682	69.1948		26.6629
88.827	98.095	102.092	109.644	68.6871	105.069	82.0548	128.584		18.2649
74.3354	91.8076	46.279	110.118	86.0114	93.3029	56.4475	40.3325		24.9088
70.9452	153.501	131.937	72.0975	96.5938	152.008	121.071	106.973		32.3654
103.833	46.9178	110.335	38.8691	61.9035	82.7909	73.235	52.6199		26.19
45.2	29.8358	24.8043	48.018	35.8165	41.0029	29.244	28.8645		8.54096
70.3821	70.0601	58.9018	48.0273	69.0914	52.6701	52.893	54.5747		9.01129
79.1785	120.123	96.1519	92.8269	83.7153	23.7935	152.488	138.875		40.041
26.2812	22.0856	20.6165	14.5528	16.9665	8.75998				6.16732
0.0992217	0.141229	0.189524	0.19802	0.158863	0.17978	0.176091	0.135844		0.0329464
96.8573	82.3546	77.2179	81.9334	178.722	77.685	59.8473	88.4733		36.257
0.164224	0.239639	0.15896	0.104451	0.2117	0.204693	0.227106	0.191817		0.0438171
0.171397	0.213408	0.178452	0.176669	0.125568	0.239111	0.194822	0.0963314		0.045726
139.512	78.9006	97.5415	97.8101	77.4714	50.2372	57.0427	92.8362		27.8315
67.4414	92.6116	92.7836	109.264	52.4423	70.8902	48.2361	80.7484		21.0669
11.099	13.185	12.9426	5.9825	9.32265	15.8358	10.1962	8.59059		3.07742
35.6122	40.8566	65.1573	142.395	40.7095	39.0258	47.5317	24.7242
									22.5441

## Sheet: MaxAnfJerk
76729	66538.9	65541.3	137156	170316	44357.8	77139.7	96902.1		41864.3
313425	72249.1	514053	242502	74863.3	562727	276737	107033		189616
129403	94755.6	161585	100904	170269	380878	286470	242215		100054
299657	16210.9	42381.7	52767.1	29180.5	39318.6	45324	16027.4		94701.9
131180	82247.1	260607	67918.2	76525.3	123075	148389	107094		61798.7
206728	108155	148281	70590	249443	87833	281736	40662		88103.4
44606.2	19384.7	25187.9	113391	65742.1	73283.5	127550	185750		56959.8
50968.8	81947.2	45545.1	128715	44372.1	73510.8	66798.3	33433.1		30275.8
79974.2	192078	193179	232603	221687	464058	128832	139609		115974
17912	75623.6	23259.6	30494.7	15960.6	75769.9	43760.7	31848.2		24088.8
218044	27288.3	189768	96335.5	85533.5	241008	99457.6	109162		74244.4
49130.5	66723.2	170865	423139	211410	270812	188093	364513		131420
171193	30300.2	317640	105840	66909.8	32961.5	226826	99510.9		100793
28836.9	30529.1	12850.4	83566.1	15673.2	10613.6				27369.5
8.90354	14.9368	9.89047	8.01087	10.3879	15.2645	18.8874	5.83005		4.3988
111822	87884.6	142353	197487	407304	115106	151499	142238		101478
13.0185	13.827	15.3602	19.357	27.5524	16.2725	17.711	17.2588		4.53945
8.08105	10.0719	17.0734	9.55686	6.89584	13.4982	15.2982	10.64		3.56224
37961.5	572955	115615	68449.7	108941	126021	96987.9	97666.4		171968
364697	214812	186081	184101	473037	234277	480849	758836		201605
10388.5	15607.8	4971.45	14809	4975.71	14099.2	14748.3	3559.43		5138.63
76729	66538.9	65541.3	137156	170316	44357.8	77139.7	96902.1
									100173

## Sheet: MeanAcc
1.98019	2.39237	2.92725	3.68074	2.09724	2.08969	2.63703	1.64678		0.643448
3.1634	3.01084	2.90214	3.72991	3.26869	3.11078	2.57322	3.03036		0.329245
4.07082	3.98406	3.73835	3.83278	4.42439	4.53492	4.13485	3.61009		0.321719
4.01139	2.52952	2.16661	2.0434	2.50843	1.60687	2.2509	2.69086		0.706747
4.82458	4.23554	4.31176	3.76704	5.6387	3.55089	4.38775	4.40518		0.640368
3.04105	3.64675	3.23062	3.26285	5.52976	5.63359	4.10696	3.51849		1.03037
6.4402	7.29832	5.95353	6.82574	5.57731	6.85348	5.65623	5.72254		0.653409
2.9596	3.25336	2.11203	2.91221	1.87694	2.4106	1.72036	2.22769		0.553261
3.82763	4.48265	4.12704	4.37828	3.49397	3.25203	3.31786	4.30953		0.495166
2.90486	3.15219	3.34397	2.45206	3.35454	2.15128	3.102	1.50958		0.656143
1.47829	1.30946	1.77153	1.78017	1.4442	1.50939	1.40102	1.43227		0.170961
4.16094	4.68198	3.85035	4.01531	3.84423	3.60716	4.22284	4.0924		0.321201
4.70565	4.89	4.8265	5.73514	5.69033	2.14178	5.33163	5.67687		1.18067
0.863493	0.798743	0.759151	1.10907	1.14083	0.991639				0.161251
0.114025	0.117093	0.113329	0.116533	0.112606	0.116302	0.114383	0.115089		0.00161408
3.75051	4.33092	3.63224	5.70121	4.2842	4.30548	4.20957	5.26419		0.707607
0.0394257	0.0405719	0.0383242	0.0385267	0.0408067	0.0379024	0.0412754	0.0419244		0.00150348
0.0471343	0.0443372	0.0465123	0.0489163	0.0464344	0.0456608	0.047714	0.0459977		0.00137795
4.20116	4.49158	5.95627	5.39798	4.75922	3.39178	5.18508	3.66503		0.873499
5.69217	5.15208	5.54415	5.73635	5.40744	5.61686	4.31996	6.55044		0.624945
0.575908	0.595854	0.605384	0.609744	0.566243	0.619798	0.689483	0.487514		0.0568204
1.98019	2.39237	2.92725	3.68074	2.09724	2.08969	2.63703	1.64678
									0.600658

## Sheet: MaxAcc
4.16797	3.62341	7.52767	9.92819	6.21673	4.75133	5.15146	3.12554		2.2621
6.01646	4.55418	6.25232	8.34476	5.83693	6.10094	4.74136	6.30522		1.15656
11.1112	6.08054	8.60522	9.37685	13.2131	9.59378	10.1742	8.50124		2.08049
7.94078	3.83512	5.58626	4.94727	6.90632	4.02958	5.73493	5.59626		1.37347
13.0869	8.63763	11.5922	8.54815	10.1409	4.68553	7.22823	9.59921		2.58799
7.87811	10.8002	5.7336	5.67335	15.2655	11.3728	13.2821	6.57877		3.63894
11.1399	10.8628	11.1216	12.0945	9.41071	11.0409	9.59418	12.7847		1.1301
10.5798	11.2294	5.86906	11.3706	9.79531	13.0502	9.155	5.04193		2.76518
9.28859	11.9828	12.7982	7.86886	8.4555	8.45567	9.52773	9.61286		1.75041
9.07669	5.62442	8.27877	4.87337	6.10144	7.45823	6.98508	3.32944		1.87355
3.98611	2.80006	4.04095	6.17862	5.27381	5.26681	3.64347	3.71575		1.10635
11.9964	10.9222	10.8875	7.4884	8.71781	6.50869	10.5826	8.00239		1.96762
12.1361	13.5172	18.1448	15.4642	11.9157	9.5906	15.5408	13.983		2.6411
2.85162	1.98876	2.44961	2.77195	2.18319	1.67081				0.459032
0.120767	0.123962	0.122528	0.12341	0.121005	0.140064	0.126193	0.123999		0.00623902
10.8266	8.13964	8.28107	8.84408	10.4125	9.53398	8.41631	11.1759		1.21458
0.051088	0.056837	0.0471687	0.0469358	0.0478832	0.0493631	0.0524149	0.049796		0.00329104
0.0546831	0.0526163	0.0542464	0.058334	0.0530827	0.0571728	0.0613215	0.0536665		0.00303129
11.4133	8.4322	10.7662	9.11331	8.62058	6.14724	8.36213	7.438		1.69215
16.037	15.6182	14.4571	12.1536	11.0457	9.35255	10.6297	15.4389		2.60605
1.13244	1.20923	1.2002	1.00611	0.90586	1.25775	1.07317	0.800755		0.15988
4.16797	3.62341	7.52767	9.92819	6.21673	4.75133	5.15146	3.12554
									1.89135

## Sheet: MeanGyr
94.6502	135.988	136.762	149.302	120.042	141.265	166.517	103.055		23.8513
144.908	132.806	131.449	173.742	132.759	142.164	123.309	142.762		15.2545
165.074	167.916	169.858	149.732	138.39	154.533	138.583	131.456		14.8423
183.643	108.526	97.967	113.302	109.638	88.1173	89.3827	128.58		30.7962
127.005	123.934	127.513	115.843	145.309	107.626	137.076	134.352		11.9487
98.2164	132.03	113.915	103.943	151.545	162.01	126.609	119.566		22.1419
162.436	178.128	138.923	169.733	146.459	159.221	146.604	138.808		14.5854
115.008	88.4588	93.0387	78.69	63.9318	57.9757	60.0029	103.421		21.0708
158.132	119.17	168.416	168.194	152.103	127.735	151.12	128.881		19.0791
110.165	126.928	114.366	100.065	143.71	97.4583	111.408	61.9437		23.8598
71.0166	56.9964	64.2907	81.0339	71.9995	64.7424	55.6325	74.7741		8.7646
152.694	174.3	185.133	178.788	154.753	170.079	158.501	175.631		11.9988
175.004	199.913	171.331	175.507	189.269	116.789	169.556	193.605		25.6129
41.9238	48.7689	53.755	40.7646	60.0082	43.5083				7.5798
0.531257	0.535633	0.534053	0.52892	0.530518	0.536701	0.536356	0.532212		0.00290643
166.909	205.716	169.826	250.229	152.06	167.574	187.955	201.857		31.3094
0.546843	0.550238	0.554466	0.552318	0.552939	0.543406	0.550973	0.547391		0.00368295
0.511523	0.51899	0.516971	0.517483	0.522805	0.517615	0.52704	0.51838		0.00452896
177.016	154.118	167.084	154.326	150.287	151.626	182.434	132.263		16.1639
204.497	163.564	164.815	185.835	189.16	182.78	158.713	213.05		19.6728
20.5827	23.2504	27.2718	26.9081	26.3963	27.0652	24.704	17.3825		3.59608
94.6502	135.988	136.762	149.302	120.042	141.265	166.517	103.055
									18.3971

## Sheet: MaxGyr
213.417	316.952	336.99	403.269	441.911	321.564	317.399	195.827		83.548
277.892	257.925	259.675	266.605	243.677	348.958	263.685	211.169		38.9852
241.696	241.446	238.333	263.317	223.521	332.234	223.551	196.323		40.1854
269.233	184.841	255.704	184.537	200.271	209.226	213.467	201.628		31.3208
238.65	243.778	230.079	207.12	286.519	207.366	261.227	235.444		26.414
147.308	199.474	176.052	170.364	217.527	232.374	181.528	171.058		27.7809
333.509	295.902	296.747	335.449	241.983	252.005	270.239	311.116		35.0279
345.876	294.112	240.891	249.367	213.79	260.805	251.065	207.477		44.6519
449.176	233.719	392.363	314.564	301.19	321.684	351.324	294.148		65.6814
172.993	206.583	211.891	190.285	251.087	270.138	292.882	153.178		48.6689
178.817	153.914	186.57	233.999	184.649	177.38	157.688	220.141		27.8396
214.813	263.677	342.037	287.433	256.753	316.409	333.212	299.525		42.7895
266.37	325.215	342.022	266.241	365.864	226.497	277.639	449.493		71.1947
110.994	90.2645	157.259	126.187	170.317	86.5502				34.5398
0.552899	0.572127	0.556011	0.551935	0.55111	0.564288	0.570203	0.543747		0.0100361
371.995	381.457	345.068	479.777	315.995	445.326	424.343	429.853		54.9029
0.571461	0.591965	0.59681	0.593054	0.595091	0.596399	0.591128	0.586662		0.00829569
0.547747	0.530121	0.549219	0.543179	0.546447	0.541094	0.566708	0.547802		0.0101946
373.855	224.993	351.195	291.987	339.271	304.317	304.78	219.198		55.8912
341.584	299.372	295.694	306.598	309.39	312.271	288.445	343.574		20.3129
50.6592	65.7938	55.5021	61.5314	50.8689	63.0536	47.962	39.6997		8.78946
213.417	316.952	336.99	403.269	441.911	321.564	317.399	195.827
									43.5687

## Sheet: RMSAcc
2.22024	2.55	3.48235	4.36921	2.56849	2.31352	2.805	1.88283		0.797561
3.46803	3.19598	3.07687	4.08601	3.50908	3.32909	2.68098	3.22229		0.403004
4.51747	4.08151	3.96155	4.1799	4.75703	4.84638	4.43503	3.93853		0.352079
4.27275	2.66981	2.53071	2.3272	2.94651	1.78222	2.69599	2.90189		0.712264
5.15722	4.45779	4.56715	3.91165	5.8283	3.69346	4.46989	4.55328		0.671036
3.17516	3.8962	3.3241	3.31785	5.88886	5.8507	4.53703	3.65643		1.11316
7.11026	7.72457	6.84257	7.54749	6.00025	7.22577	6.14613	6.66512		0.619372
4.21071	4.48612	2.57411	4.11142	3.13391	4.12726	2.67746	2.50017		0.837373
4.59386	5.40885	4.95402	4.67935	3.9757	3.90904	3.97464	5.3419		0.608792
3.25747	3.34022	3.59897	2.77975	3.59549	2.76051	3.57121	1.68807		0.655196
1.7133	1.4415	1.94205	2.11926	1.87795	1.83863	1.55674	1.66141		0.219198
4.75732	5.06349	4.24713	4.37449	4.17865	3.76083	4.53406	4.33998		0.391085
5.11393	5.44339	5.8753	6.2333	6.00264	2.57174	5.8791	6.17829		1.20714
0.9947	0.906899	0.929867	1.23695	1.22927	1.01862				0.145601
0.11409	0.11715	0.113438	0.116595	0.112688	0.11674	0.1145	0.115144		0.00165008
4.6002	4.81546	4.31669	6.01857	4.95509	5.03639	4.76473	5.95786		0.614985
0.0396272	0.0410221	0.0385455	0.0387302	0.0410847	0.0382224	0.0416242	0.0421926		0.00153791
0.0473362	0.0446117	0.0466997	0.0491502	0.0465244	0.0458782	0.0480576	0.0461241		0.00139251
4.56431	4.66775	6.61155	5.65763	5.20938	3.62069	5.41206	4.13886		0.940041
6.2107	5.77689	6.28621	6.23959	5.87588	5.94427	4.93313	7.15296		0.620775
0.606606	0.629402	0.656623	0.638984	0.585039	0.658454	0.71252	0.508091		0.0604679
2.22024	2.55	3.48235	4.36921	2.56849	2.31352	2.805	1.88283
									0.645531

## Sheet: RMSGyr
107.268	154.852	159.419	179.436	156.051	158.821	177.999	113.425		26.8174
160.497	144.869	144.993	182.602	146.124	162.131	138.252	152.244		14.1625
172.515	174.27	175.442	161.725	147.472	166.128	147.204	141.581		13.5973
195.993	121.116	118.028	123.628	120.656	96.0402	108.52	136.907		30.0523
142.205	141.351	141.669	127.241	166.74	122.823	152.241	148.721		13.847
106.247	138.982	122.213	113.294	160.363	170.55	134.283	127.119		22.171
190.736	192.068	165.475	197.512	163.528	175.411	164.405	163.551		14.5967
137.632	113.159	109.556	94.99	79.959	78.1505	79.0584	118.589		21.8876
192.659	130.368	191.848	183.506	167.853	151.191	172.696	150.946		22.1289
113.836	135.914	127.6	113.777	154.2	117.541	133.995	73.9111		23.5097
81.2362	63.8018	72.4949	95.0933	80.8787	74.5657	63.9548	89.4691		11.2291
164.266	185.935	199.508	194.287	169.372	192.821	183.387	189.327		12.2713
187.292	212.49	185.899	185.302	208.324	132.806	181.96	216.135		26.4432
51.8286	54.8766	65.4361	51.4181	80.0085	50.244				11.7078
0.531381	0.535925	0.534208	0.529124	0.530617	0.536986	0.53663	0.532236		0.00297068
211.674	229.004	202.486	270.758	180.129	213.788	225.986	238.8		26.8093
0.547	0.55059	0.554662	0.552605	0.553262	0.543692	0.551219	0.54762		0.00369184
0.51181	0.519055	0.517185	0.517813	0.522914	0.517707	0.527299	0.518565		0.00451101
192.014	159.418	192.596	167.807	176.029	170.683	198.073	143.032		18.7755
220.93	179.307	178.979	199.593	200.553	197.16	179.609	229.771		19.2499
24.771	29.1731	31.1064	31.7783	30.5872	31.572	28.3128	21.093		3.79044
107.268	154.852	159.419	179.436	156.051	158.821	177.999	113.425
									18.7013

## Sheet: SE_Acc
0.338165	0.418516	0.336781	0.362366	0.287332	0.451985	0.407656	0.290333		0.0601077
0.503416	0.345235	0.427851	0.538702	0.305382	0.29967	0.341107	0.37086		0.0898172
0.217244	0.499248	0.435882	0.369199	0.277063	0.39128	0.156425	0.167835		0.128236
0.217533	0.36345	0.287259	0.271674	0.19768	0.486841	0.20175	0.264126		0.0975459
0.188818	0.3248	0.292538	0.25154	0.47347	0.162747	0.378868	0.390791		0.105741
0.224028	0.208259	0.307485	0.259109	0.164381	0.305382	0.191108	0.313658		0.0581061
0.318259	0.313843	0.253781	0.393671	0.39327	0.324302	0.296703	0.204126		0.0640631
0.130881	0.134162	0.257374	0.161847	0.0679777	0.0991176	0.14449	0.285216		0.0747327
0.457425	0.427694	0.424532	0.411256	0.467402	0.331357	0.326701	0.282675		0.0681975
0.287176	0.409154	0.219437	0.30141	0.415113	0.185347	0.342059	0.452169		0.095828
0.37182	0.268985	0.361756	0.235372	0.245512	0.174561	0.407931	0.360964		0.0828853
0.11502	0.175741	0.342241	0.353139	0.31178	0.540621	0.353703	0.247408		0.129701
0.412956	0.317676	0.091488	0.231329	0.431441	0.195407	0.406409	0.291413		0.12001
0.472959	0.316601	0.366644	0.438571	0.222451	0.347219				0.089376
0.265335	0.473183	0.483797	0.360345	0.531178	0.345924	0.435618	0.428331		0.0864995
0.239934	0.291257	0.275767	0.581156	0.344533	0.335451	0.353477	0.346871		0.103267
0.421241	0.499519	0.359833	0.437649	0.535469	0.526981	0.514367	0.513861		0.0627448
0.368169	0.463734	0.349948	0.537954	0.511722	0.546892	0.46216	0.393344		0.0765719
0.330197	0.240348	0.296485	0.340258	0.199774	0.256079	0.36264	0.271726		0.0554045
0.383151	0.305382	0.193638	0.403443	0.218689	0.366023	0.28194	0.300105		0.075508
0.49208	0.543879	0.404477	0.327637	0.535702	0.556304	0.447118	0.465338		0.0781909
0.338165	0.418516	0.336781	0.362366	0.287332	0.451985	0.407656	0.290333
									0.0907288

## Sheet: SE_Gyr
0.317385	0.386081	0.232021	0.258153	0.112171	0.243622	0.414166	0.272217		0.0948526
0.562034	0.378308	0.307943	0.579445	0.310012	0.459621	0.233407	0.329936		0.126221
0.417636	0.481451	0.524683	0.367725	0.311112	0.302107	0.472111	0.371413		0.0817166
0.233948	0.177089	0.150524	0.303644	0.289639	0.335	0.170088	0.287944		0.070335
0.384846	0.348472	0.315906	0.287075	0.329143	0.279941	0.352054	0.301325		0.0358433
0.148327	0.291463	0.213991	0.211309	0.172203	0.290924	0.273083	0.187841		0.0553123
0.198735	0.258862	0.183175	0.2218	0.172704	0.120504	0.24377	0.211162		0.0436142
0.208224	0.195895	0.212128	0.259362	0.201238	0.157574	0.153071	0.214363		0.0337322
0.246459	0.454816	0.469123	0.380974	0.41047	0.408242	0.375933	0.446506		0.0703381
0.212283	0.306416	0.346871	0.245194	0.36814	0.217367	0.182868	0.221965		0.0687121
0.396815	0.311495	0.400921	0.339717	0.366401	0.241598	0.430166	0.183663		0.084853
0.113961	0.282918	0.513096	0.46242	0.316431	0.325	0.475424	0.383417		0.1295
0.37086	0.443149	0.281412	0.286147	0.525354	0.143618	0.390336	0.26865		0.118597
0.184413	0.201557	0.0989171	0.266072	0.0650369	0.186749				0.0731224
0.332134	0.507595	0.4669	0.382551	0.426681	0.554311	0.538997	0.457544		0.0764293
0.113476	0.241741	0.234636	0.434613	0.314007	0.195549	0.256025	0.188052		0.095544
0.522234	0.295981	0.495261	0.524695	0.411337	0.360623	0.335447	0.569095		0.101732
0.349459	0.459268	0.443384	0.399156	0.387151	0.57818	0.514383	0.454255		0.0730354
0.263929	0.315	0.178672	0.343504	0.183426	0.324758	0.278243	0.247982		0.0618487
0.384931	0.487585	0.328504	0.44418	0.299378	0.287682	0.273558	0.366463		0.0768941
0.117239	0.153677	0.160533	0.240313	0.231029	0.193056	0.250529	0.168042		0.0475812
0.317385	0.386081	0.232021	0.258153	0.112171	0.243622	0.414166	0.272217
									0.0835598
