# Supplementary material for: Reliability and Discriminative Validity of Wearable Sensors for the Quantification of Upper Limb Movement Disorders in Individuals with Dyskinetic Cerebral Palsy
Source: Sensors (Basel). 2023 Feb 1;23(3):1574. doi: 10.3390/s23031574 (PMC9921560; doi:10.3390/s23031574)
Supplement: Supplementary file 1 [file sensors-23-01574-s001.zip › sensor_parameters_short_upperam_RF.xls]

## Sheet: MaxJerk
47.2218	21.4575	16.8839	21.1223	51.2519	31.7769	49.3977	66.333		17.8733
35.5855	22.8494	49.2997	29.7325	14.1594	40.5108	30.9263	48.0755		12.0869
15.9993	27.2156	21.4078	48.6116	36.5351	35.6011	29.9679	56.0333		13.3779
17.1518	12.8996	13.0191	8.61923	12.3519	27.0541	16.0681	7.98906		6.01606
32.8847	29.7866	30.3884	20.6301	52.1553	45.14	34.7565	43.0548		10.084
11.2275	32.854	24.8007	10.9053	37.2061	42.1038	15.9616	29.8256		11.9139
26.4846	43.7891	24.1779	42.7162	17.5577	28.9795	32.3962	22.2808		9.40327
54.444	29.305	60.8575	55.0839	24.618	60.5718	50.5193	48.0587		13.7197
51.6884	56.0219	56.1401	60.7734	42.3925	25.6864	37.581	55.5214		11.9609
29.9834	23.5281	23.7175	27.1426	34.2926	30.8889	21.5321	30.8535		4.47843
13.7206	23.6308	19.0699	33.5616	24.0521	26.2948	36.6355	28.3222		7.39758
14.6851	20.8918	18.0635	17.0365	37.1922	31.5482	18.1928	23.2648		7.83731
26.8941	55.5717	17.6688	23.2106	36.1603	18.8851	18.8155	30.9236		12.7141
10.4363	19.6502	23.8228	16.3355	48.5073	27.602	19.6391	14.291		11.78
46.4016	74.8313	82.4202	110.861	56.4318	58.6602	61.933	51.3571		21.0199
31.5749	23.4488	39.3618	35.2161	47.761	23.6303	42.3293	46.4838		9.48628
18.4067	31.0995	33.0733	15.8164	18.5705	9.90674	10.6908	26.3168		8.80543
88.6315	145.945	93.0337	154.633	200.558	89.3573	109.253	82.4641		42.3167
32.1791	37.3927	28.578	30.3354	38.0909	71.846	53.6169	37.4795		14.5901
23.5003	26.3018	43.8614	34.2955	36.3194	38.1072	30.2525	37.4481		6.70356
18.9219	16.5391	16.5684	26.791	19.2818	41.0214	28.1561	22.9795		8.23231
									15.0105

## Sheet: MaxAnfJerk
42075.1	11739.2	34565.8	11276.4	26406.9	17629.4	32302.1	53345.5		14893.6
87484.1	113667	82469	31213.8	20359.5	83852.2	48601.4	79972.5		31772.8
37862.1	167347	112594	415899	172574	143200	157854	330876		121898
32551.1	30605.3	10138.6	8834.54	19973.5	55985.6	30650	14261.5		15593.5
53939.1	101884	92008.1	21145.1	173444	51743.2	38535.9	129654		51295.7
55271	81513.8	164253	23452	39773.4	52988	50422.4	38538.5		44101.1
34158	69454.6	18630.7	103193	29167	46428.6	113364	17916		37423.5
134831	328048	303943	161716	42614.5	327822	170889	138876		105962
162610	87168.8	267727	53332.2	35683.5	56476.4	37822.9	73415.9		80103
91589.9	10162.1	33117.2	14229.1	20468.7	4946.21	47690.1	30464.4		27920.6
31996.9	120508	79855.5	27151.8	54534.7	88235.8	73920.9	13876.8		35964.6
36925.1	56173.4	35317.2	25872.4	46602.4	59858.8	58273.2	78583.8		16904.3
151883	246081	16211.8	30516.9	67353.2	16055.8	36302.3	39854.1		81834.1
5869.23	43381.1	20137.4	18485.4	66573.1	26046.5	40838.9	38159.9		18826.3
32256.5	50111.7	28674.7	182496	51035.1	27415.8	101204	81577.6		52726.6
35471.9	53500.1	85716	85758.7	138464	78627	80014.4	77854.6		29695.5
19221.9	40696.1	60042.4	22067.6	12566.8	10378.3	50288	29448		18103.3
316155	300565	108585	166936	233845	232529	530065	293397		125683
37593.6	39771.9	23276.1	40434.2	45392.8	233375	11305.2	135011		75578.7
45531	27308	19625.7	196511	37670.7	16494.6	15457	41271		60317.1
8652.25	22836.6	12170.9	36255.8	9795.04	27136.8	8495.56	20595.5		10180
									62691.4

## Sheet: MeanAcc
1.28868	1.25832	1.19883	1.41513	1.72118	1.62116	1.38069	1.43338		0.179281
1.44495	1.08372	1.38865	1.36303	0.984484	1.4008	1.37706	1.22818		0.16833
1.44872	1.38754	1.34372	1.72193	1.48295	1.66991	1.53173	1.63351		0.136745
0.914606	0.835712	0.812916	0.833512	0.85221	1.07229	0.834999	0.832683		0.0857803
2.60699	1.97697	2.57842	2.3413	2.29298	2.81967	2.20322	2.25972		0.267589
1.21017	1.11416	1.16786	1.00916	1.11682	1.28369	1.04255	1.32788		0.111206
1.35564	1.32408	1.34504	1.33887	1.2362	1.33274	1.37944	1.06078		0.104062
1.90648	1.78524	2.10815	2.30798	1.51933	2.10986	1.81354	1.90115		0.242455
1.06214	1.72583	1.36218	1.56792	1.13455	1.11006	1.1808	1.44362		0.241268
1.36314	1.22661	1.41071	1.29233	1.30968	1.43432	1.44828	1.27964		0.0807094
1.12638	1.3893	1.03643	1.11872	1.07497	1.31236	1.39727	1.16746		0.142819
1.32833	1.44033	1.43325	1.44851	1.28401	1.39884	1.08916	1.20628		0.129301
1.75614	1.93609	1.80609	1.63195	2.03354	1.60462	1.89773	2.02704		0.165523
0.80294	0.839277	0.841891	0.650041	0.703673	0.933216	0.824455	0.758267		0.0885533
2.41468	2.66032	2.9832	1.98737	2.01127	2.64363	1.98734	2.85286		0.405268
1.64381	1.80367	1.77642	1.9018	2.13075	1.20329	2.00382	1.94319		0.283554
1.10154	1.60578	1.19923	1.29592	1.04517	0.972605	1.07305	1.22667		0.1983
2.71111	2.66822	1.47444	3.24233	3.2486	3.44713	2.53309	3.52469		0.672861
1.62997	1.65169	2.05143	1.84883	2.89272	2.58859	1.74223	2.65288		0.504241
1.70471	1.62882	1.77748	1.49124	1.61196	1.28535	1.72704	1.88094		0.184203
1.45409	1.35694	1.43849	1.35941	1.46202	1.82707	1.86532	1.48186		0.20029
									0.268534

## Sheet: MaxAcc
4.94664	2.8848	2.56166	2.32323	3.78621	3.83215	4.20263	6.01524		1.24982
2.67961	1.86124	3.54319	2.66656	1.69132	2.73994	2.10288	2.57624		0.589055
2.76735	2.66558	4.30293	4.31743	3.82469	3.30436	3.35868	3.63851		0.623897
1.91697	1.74859	1.70515	1.75851	1.92963	2.55122	1.71697	1.48165		0.315218
4.41884	2.86011	3.85466	3.99073	4.15579	4.90724	3.14002	4.11101		0.660713
3.08754	3.70833	3.39095	2.01612	3.08026	3.34114	2.20428	3.12048		0.585594
2.56324	3.42432	2.58087	3.11088	2.24787	2.59114	3.36566	2.31748		0.460872
5.03069	3.04959	5.33112	5.46314	3.13711	4.35029	4.43686	3.56152		0.95859
2.98931	5.38346	4.36048	4.01556	2.66242	3.16762	2.80541	3.8712		0.929645
3.35566	3.10314	3.24405	3.54612	3.93524	3.47018	2.88839	3.23805		0.314685
2.87157	3.83303	2.90189	2.38948	2.47891	2.98173	3.17475	3.96383		0.5707
2.39801	2.5042	1.8362	2.19553	1.93492	3.09015	1.38633	1.80125		0.524011
3.76189	3.85774	4.32747	3.13005	4.5051	2.77147	3.4366	3.52857		0.578978
1.22836	1.71657	2.29052	1.58109	2.45737	1.97934	1.51185	1.62454		0.414101
4.12572	7.14595	5.89439	6.17234	4.68004	6.13814	4.9504	5.04712		0.984824
3.8336	3.43488	4.19259	4.29257	5.83223	2.73308	4.98122	5.33622		1.022
1.90889	4.07615	3.26608	2.29389	1.94014	1.64234	2.0359	2.61302		0.822361
6.14699	8.03236	4.40601	8.29946	11.7536	6.57828	8.24644	6.67466		2.15487
3.82497	3.29395	4.1506	2.84534	5.26263	6.34455	3.59995	4.47379		1.13122
2.85596	3.32195	4.29326	2.65964	3.2852	3.85156	3.5577	3.7709		0.535593
2.7051	2.71551	2.54638	3.40212	3.00445	4.9318	3.58122	3.01007		0.770484
									0.890869

## Sheet: MeanGyr
61.9339	59.8232	43.3389	79.148	73.7698	85.6029	81.7878	74.12		14.0239
76.2319	62.9425	73.6133	65.334	67.1937	79.6815	72.7312	60.7813		6.73205
74.7764	68.8307	63.016	84.9554	78.5506	91.2925	85.0008	76.5632		9.22191
59.3718	47.8354	43.7871	45.2222	49.9605	75.9096	42.4893	49.0726		11.0792
100.364	96.1323	105.973	101.487	106.457	117.405	93.9072	103.019		7.24376
66.1917	54.9606	60.7103	62.9889	58.9233	62.8119	62.3497	61.6266		3.30491
72.1697	70.2431	69.4518	73.9469	73.3172	62.3278	80.499	57.0954		7.24231
71.3133	78.2483	78.6701	124.268	88.17	83.2492	75.3867	82.8763		16.5804
66.0065	80.2036	68.2388	79.2885	63.1741	56.8262	57.6479	70.0844		8.77696
67.348	50.4681	67.4793	55.3442	59.2312	52.76	67.0673	57.0839		6.89338
45.897	56.3824	38.7584	44.3712	50.4879	50.2004	65.9227	45.0235		8.39311
92.1884	100.446	94.7104	98.424	99.7676	89.0595	90.0479	94.5375		4.34327
116.562	130.985	110.62	117.457	120.669	106.002	108.944	115.161		7.81803
56.561	33.5575	50.2422	40.0628	44.513	48.6492	32.3867	40.6945		8.32733
131.505	131.134	163.953	131.595	129.654	142.514	130.914	148.735		12.2759
80.8952	76.3527	82.0499	95.9659	106.208	82.1259	110.92	84.9261		12.8509
40.1758	54.6404	35.2848	39.6296	40.2559	43.1281	45.2757	51.8763		6.55704
147.065	149.522	92.1125	159.889	168.154	178.54	116.281	168.399		29.3429
81.9367	89.6691	98.2183	104.18	130.387	103.631	90.2767	123.135		16.7441
93.074	96.9509	96.1444	91.6379	90.8966	49.4281	90.1753	102.267		16.4077
60.4193	53.2378	56.5959	57.3187	62.1237	69.9069	68.7022	63.6506		5.83741
									12.2237

## Sheet: MaxGyr
117.382	154.765	120.879	189.414	125.554	209.042	137.906	112.448		35.8474
151.879	114.234	106.39	140.278	107.52	130.35	127.209	100.816		18.0682
121.549	108.985	104.33	176.41	118.32	140.224	121.019	123.822		22.6948
137.045	82.1112	79.6658	85.1087	109.488	188.554	140.054	122.008		37.3303
208.977	162.693	192.027	196.948	178.746	195.733	177.483	167.883		15.8944
110.416	99.5301	109.118	101.207	103.482	118.982	91.1284	122.059		10.2829
200.455	186.364	225.887	176.137	166.138	184.939	178.913	180.916		18.3295
195.373	238.024	250.991	232.375	233.086	188.053	229.255	195.319		23.6971
119.693	151.077	126.269	137.013	99.511	116.612	125.406	117.604		15.2278
105.519	79.961	119.118	98.406	90.4236	79.9278	91.2912	90.8281		13.1302
116.53	128.772	96.094	76.814	98.0187	114.557	146.061	117.724		21.3391
174.71	169.612	170.364	176.584	144.341	154.955	137.849	147.727		15.1247
184.422	223.691	164.724	173.293	181.412	177.856	171.142	199.952		18.9868
78.5168	116.947	98.9373	59.7022	90.2993	108.777	81.5167	83.4291		18.2177
178.192	218.01	212.43	262.352	184.759	231.667	191.338	216.694		27.4963
148.972	183.1	150.49	161.938	172.884	132.896	186.584	165.416		18.221
62.4985	201.038	121.24	77.3491	66.2621	78.7013	95.8927	99.5439		45.0197
297.344	191.802	140.408	210.015	239.152	281.884	206.366	269.061		52.4794
229.571	180.78	196.329	161.1	245.37	177.806	142.854	218.032		35.0967
150.703	175.446	178.768	158.074	160.945	141.26	160.013	181.216		14.1213
112.062	128.296	113.818	101.981	119.103	135.176	142.004	112.371		13.4447
									26.4931

## Sheet: RMSAcc
1.55594	1.40147	1.30483	1.49386	1.91388	1.8449	1.60752	1.66073		0.207694
1.54172	1.13442	1.58987	1.48295	1.04114	1.51076	1.42229	1.36332		0.198142
1.4946	1.48359	1.59411	1.99116	1.72936	1.80545	1.69994	1.88003		0.180729
0.99934	0.882054	0.84328	0.887529	0.914233	1.21136	0.881215	0.900388		0.11851
2.82903	2.05183	2.75884	2.48995	2.45175	3.03437	2.32043	2.4294		0.312733
1.34022	1.34913	1.37306	1.0627	1.32522	1.45908	1.15769	1.42691		0.134631
1.45857	1.46415	1.50826	1.50923	1.33715	1.46594	1.55697	1.17639		0.122222
2.17805	1.90237	2.37552	2.59069	1.67067	2.41963	2.06361	2.05841		0.298819
1.18271	1.98696	1.556	1.70831	1.25996	1.22018	1.26706	1.64625		0.290856
1.52698	1.32419	1.57046	1.42048	1.46853	1.52348	1.56219	1.39406		0.0878841
1.29583	1.67199	1.14505	1.21327	1.19771	1.44062	1.5937	1.4097		0.192038
1.41996	1.55914	1.47054	1.52469	1.33304	1.54583	1.10952	1.2518		0.159604
1.91106	2.10638	1.97313	1.72269	2.23788	1.70296	2.02686	2.181		0.197399
0.816213	0.900847	0.925939	0.710657	0.867836	1.00542	0.889779	0.83275		0.0865784
2.53172	2.92416	3.21654	2.39786	2.25709	3.00213	2.23549	3.02399		0.386346
1.79499	1.96808	2.06073	2.13077	2.55602	1.33244	2.36667	2.20336		0.372847
1.14404	1.84467	1.31019	1.35638	1.14164	1.02124	1.14802	1.32769		0.253409
3.07723	3.09456	1.66652	3.63629	3.98707	3.75956	3.09856	3.82614		0.743137
1.82113	1.84081	2.29997	1.96661	3.21765	2.83256	1.96502	2.8053		0.538426
1.77957	1.75081	1.96848	1.57991	1.71814	1.44803	1.88291	1.99843		0.187895
1.5822	1.49896	1.57652	1.53088	1.65858	2.16306	2.03365	1.60131		0.249309
									0.303522

## Sheet: RMSGyr
69.6722	74.6031	51.6567	98.8065	77.9266	101.734	90.151	78.613		16.3585
85.6336	70.0431	77.7995	77.0686	73.254	87.2764	81.8729	65.5375		7.53638
83.7234	75.0245	69.1296	92.1531	82.7545	100.121	88.2111	81.8367		9.65085
66.2632	53.3334	47.9047	50.2818	56.4677	86.9437	52.7722	56.0909		12.6379
119.419	107.504	119.487	118.136	118.601	130.39	109.091	112.897		7.21812
73.1011	62.7712	68.2721	69.0704	66.2478	73.8628	66.8942	69.7691		3.6232
91.9031	85.7827	94.0994	92.0715	89.5423	82.7305	93.7718	76.517		6.19354
86.2747	99.8482	107.608	135.103	103.345	100.87	93.5792	101.551		14.3171
73.1916	89.8414	75.8983	86.386	67.8843	64.1563	68.5131	75.1741		8.9776
71.6311	54.4956	73.864	59.9408	64.2379	56.0895	69.2678	60.5104		7.21529
54.0513	64.7228	45.7408	48.9143	55.0096	58.3344	76.5667	55.5206		9.63808
104.931	110.616	106.479	108.403	106.491	96.279	96.3514	102.365		5.3072
124.629	137.862	117.204	122.914	128.747	115.285	117.07	125.355		7.43723
59.6685	45.1451	54.3203	43.0014	50.6559	60.9646	38.8597	48.1575		7.86287
134.549	137.648	168.044	138.829	131.69	149.398	137.589	155.263		12.4387
93.1181	94.1713	92.9161	104.99	113.484	90.1931	123.74	97.8232		11.887
42.4632	75.6617	48.0037	42.6346	43.7208	47.9796	52.4369	59.3427		11.2857
160.17	152.962	96.6801	161.937	171.198	184.698	123.004	175.571		29.3931
101.851	102.161	112.728	111.193	148.362	108.358	98.4047	139.126		18.4056
99.7661	110.378	110.787	103.442	103.297	64.8865	99.9694	113.784		15.4218
66.5924	62.7614	64.7361	64.214	70.2483	79.9638	79.5282	68.2147		6.72689
									12.5815

## Sheet: SE_Acc
0.284032	0.466967	0.441394	0.463573	0.523646	0.305694	0.333886	0.297205		0.0940625
0.475557	0.461459	0.333144	0.584839	0.442454	0.571257	0.503469	0.299144		0.101673
0.346746	0.275665	0.315081	0.298183	0.313315	0.479573	0.272644	0.326092		0.0659035
0.290402	0.240544	0.394097	0.341715	0.431834	0.40105	0.388026	0.35103		0.0633681
0.396731	0.419071	0.459268	0.412845	0.242468	0.378708	0.281851	0.455766		0.0787886
0.107444	0.138314	0.364357	0.469507	0.256855	0.283594	0.289907	0.326763		0.116932
0.357886	0.540679	0.433964	0.500478	0.432573	0.365968	0.632767	0.429782		0.0922601
0.528067	0.483126	0.358384	0.398423	0.507728	0.511296	0.560415	0.332505		0.0849647
0.527765	0.322805	0.429127	0.521018	0.51219	0.538063	0.617707	0.571381		0.0910107
0.20413	0.173691	0.202563	0.251219	0.231711	0.307693	0.217287	0.313585		0.0503583
0.221489	0.325936	0.35582	0.427275	0.390386	0.541131	0.462886	0.216972		0.112874
0.483229	0.314249	0.329056	0.407436	0.438471	0.282181	0.492476	0.485508		0.0849039
0.429235	0.455137	0.15155	0.412608	0.407533	0.408491	0.32747	0.468566		0.102429
0.648196	0.474249	0.450183	0.51143	0.29851	0.506207	0.493924	0.45859		0.0959741
0.350657	0.441232	0.319634	0.231112	0.230524	0.251314	0.407074	0.480366		0.0975973
0.291983	0.400759	0.254295	0.443076	0.28079	0.530413	0.322137	0.352291		0.093479
0.336472	0.298864	0.345692	0.398047	0.340121	0.445519	0.488542	0.288445		0.0705279
0.35347	0.188591	0.463094	0.180025	0.2212	0.554997	0.317867	0.538997		0.152629
0.464166	0.41417	0.460584	0.467341	0.378973	0.365746	0.419322	0.590868		0.0703433
0.459118	0.320112	0.185427	0.314143	0.325032	0.286745	0.207312	0.330664		0.0839061
0.350202	0.239068	0.298165	0.27831	0.390351	0.227866	0.261014	0.292247		0.0549817
									0.0935873

## Sheet: SE_Gyr
0.264077	0.115199	0.173621	0.17802	0.453299	0.227217	0.229238	0.255106		0.100238
0.37278	0.317214	0.283231	0.274437	0.215735	0.342848	0.227217	0.398833		0.0658999
0.22563	0.216808	0.251531	0.210542	0.36201	0.216486	0.354868	0.272486		0.0619964
0.172635	0.151651	0.188885	0.157882	0.147866	0.184111	0.107869	0.141644		0.0260691
0.277791	0.290016	0.262884	0.194628	0.232466	0.250503	0.225807	0.250728		0.0304029
0.193899	0.218827	0.301214	0.189696	0.208589	0.194482	0.154387	0.284169		0.0498192
0.17193	0.276591	0.0696741	0.204575	0.130151	0.167732	0.317818	0.127849		0.081445
0.413198	0.199932	0.181901	0.184484	0.262541	0.299597	0.390512	0.237078		0.0902516
0.160114	0.350657	0.320207	0.349466	0.312742	0.283412	0.209071	0.439309		0.0870337
0.22109	0.166084	0.176498	0.180204	0.159409	0.185317	0.208507	0.17562		0.0208552
0.243111	0.26153	0.133623	0.309956	0.351345	0.388842	0.23607	0.104386		0.0986769
0.27658	0.289755	0.273228	0.265924	0.171739	0.256666	0.231419	0.231203		0.0376946
0.341028	0.213431	0.262602	0.314811	0.222085	0.2722	0.231329	0.361137		0.0560359
0.197656	0.104618	0.33046	0.244246	0.268264	0.158106	0.312565	0.233254		0.0760749
0.322773	0.280741	0.284837	0.293589	0.285179	0.228259	0.24988	0.376235		0.0448498
0.184836	0.204197	0.287682	0.282532	0.387766	0.312418	0.233732	0.239798		0.0653089
0.226808	0.0937596	0.0864626	0.337044	0.345951	0.244805	0.268899	0.259412		0.0975471
0.312716	0.398496	0.56942	0.44917	0.391672	0.488847	0.340433	0.467985		0.0835755
0.130561	0.294675	0.262155	0.238751	0.235395	0.287062	0.216472	0.255144		0.0513774
0.273129	0.215346	0.161535	0.168379	0.112283	0.097626	0.236389	0.290083		0.0711346
0.208515	0.248249	0.232203	0.315917	0.273025	0.101277	0.139945	0.290672		0.0739489
									0.0711122
