# Supplementary material for: Reliability and Discriminative Validity of Wearable Sensors for the Quantification of Upper Limb Movement Disorders in Individuals with Dyskinetic Cerebral Palsy
Source: Sensors (Basel). 2023 Feb 1;23(3):1574. doi: 10.3390/s23031574 (PMC9921560; doi:10.3390/s23031574)
Supplement: Supplementary file 1 [file sensors-23-01574-s001.zip › sensor_parameters_short_upperam_RGV.xls]

## Sheet: MaxJerk
54.3651	16.5688	21.65	18.0524	23.933	25.9195	37.7358	16.7108		13.0816
23.9122	35.3976	45.0624	33.1496	33.8395	25.4498	21.0805	58.6836		12.3839
52.6345	24.336	37.1764	58.1438	36.3028	35.6662	21.6784	57.0377		14.1395
19.7394	18.731	37.3758	17.8609	16.5354	18.8969	37.6888	14.2077		9.35433
37.6268	56.4631	40.1152	32.8388	44.2085	25.9711	33.3579	26.117		10.0816
23.3694	33.2834	24.7138	20.5279	40.8126	16.2234	25.3527	26.8235		7.62003
42.5214	33.9628	18.0022	19.5119	23.6284	16.1035	19.6718	16.1196		9.56911
20.2192	41.5871	22.1892	26.1542	30.2577	33.141	44.6857	22.1168		9.20759
24.4145	37.9391	39.6709	26.2259	15.9544	39.8508	46.6759	43.5772		10.7677
18.1332	17.5886	23.0581	19.262	16.4673	13.3838	32.9203	17.1776		5.97429
28.7042	45.1096	20.5251	19.7493	32.2044	35.7758	85.5273	41.0114		20.9735
13.7076	40.0198	25.5056	40.3553	28.1046	11.0742	12.3507	20.1208		11.753
17.2577	16.4894	20.0823	16.8081	17.293	22.732	16.2598	26.0478		3.57009
27.646	32.3117	24.0819	31.096	17.3687	15.5181	16.642	13.9057		7.38864
50.7111	42.1988	43.4138	43.9822	21.4251	73.1236	55.7354	59.004		15.0837
37.8815	21.0367	18.088	43.1251	27.2188	44.799	50.2488	25.4357		12.0557
10.5891	23.9353	38.4487	14.7837	25.6536	18.7124	43.1177	26.8567		11.1173
94.8389	48.7834	124.388	44.7432	32.571	33.4669	50.9706	33.3275		33.6615
61.5826	42.2734	51.3684	50.207	52.506	69.4796	56.6061	57.5252		8.15908
19.8828	36.955	21.5193	17.2211	39.0796	10.7145	19.5761	51.492		13.8435
6.92949	7.07368	18.3569	12.6	6.06143	7.37235	9.33433	9.10918		4.08817
									13.5082

## Sheet: MaxAnfJerk
25400.8	77915.1	9674.44	9019.91	19072	9378.33	15644.6	14379.6		23059.8
34465.6	85128.5	111537	51326.9	162081	33039.1	65431.2	101724		43981.2
192275	198342	164475	272987	253499	83255.5	119432	288566		73081
48213.7	17960	62235.4	27686.7	15517	46046.2	93596.6	91708.5		30522.1
62078.7	188299	81848.7	55017.6	165980	14968.8	124607	36541.2		62312.3
77365.4	116248	54567.9	23875.2	186130	7390.7	38885.1	90275.1		57561.4
38932.4	54932.3	21280.3	53307.2	29941	13315.9	9902.86	20064.8		17325.8
139804	66535.2	25199.6	73814.4	72148	85687.4	22610.5	78683.5		36792
28007.8	115998	37076.8	67518.2	16594.1	58699.5	61123	59533.3		30405.4
68265.5	62620.2	324106	76457.2	20928.7	24244.5	405106	12263		151779
37987.4	35784.6	57325.1	101906	120180	68937.1	38437.1	70651.5		31136.5
21522.7	95631.3	44443.3	55681.9	90596.4	36713.2	51904.1	48290.6		25458.1
113263	10151.9	9996.9	26382.4	10699.9	18149	75141.4	55211.7		38071.6
11580.5	38624.7	24186.5	52557.2	64231	45559.7	10019.7	6069.17		21783
26461.8	113709	40438.4	58449.2	77435	92558.7	73065.1	64349.3		27764.2
54777.7	29043.1	82554.5	169095	62110.1	45678.7	56625.2	31649.1		44863.1
6748.74	25058.7	197647	50643.8	25305.1	28145	85278.3	43515.3		61156.7
368121	147235	476559	79545.7	149395	44134.6	139405	313142		152898
227701	96522.2	100175	72997.3	406699	116084	61415.8	246712		119222
22740.2	17036.9	51672.8	22949.9	29948.4	11332.7	16149.8	65436.3		19031
6091.89	5018.66	27534.3	47576.2	12239.3	27202	19873.1	12661.7		14145.4
									66995.8

## Sheet: MeanAcc
1.40288	1.29764	1.19758	1.21594	1.21024	1.25607	1.19557	1.10715		0.0868698
1.31936	1.64486	1.17265	1.38864	1.36555	1.57318	1.24908	1.83914		0.223463
1.73355	2.04707	1.6051	1.64259	1.2143	1.5824	1.4389	1.62786		0.237335
0.781777	0.859639	0.914003	0.838672	0.81927	0.90468	0.801279	0.749082		0.0576935
1.77576	2.44958	1.41424	1.49115	1.79067	1.56541	1.60414	1.65632		0.322403
1.062	1.11001	1.19232	1.24682	1.19849	0.684446	1.1286	1.08347		0.174846
1.08282	1.01761	0.748993	0.919581	0.936983	0.807082	0.663691	0.926355		0.139287
1.42577	1.56371	1.45755	1.7648	1.54657	1.61074	1.47863	1.46972		0.109998
0.955305	1.43395	1.24569	1.15678	0.780246	1.00173	1.17031	1.23037		0.202467
1.311	1.42501	1.35902	1.30389	1.24984	1.38182	1.50964	1.3186		0.0814477
1.25142	1.21545	0.992556	0.924076	1.21379	1.20309	1.35496	1.25031		0.143464
1.39616	1.66316	1.25667	1.65678	1.32002	1.2376	1.08493	1.32591		0.201745
1.20057	1.63554	1.28392	1.66492	1.84555	1.48017	1.42006	1.29162		0.222833
0.773823	0.856904	0.798699	0.747122	0.622281	0.543112	0.545234	0.552605		0.12826
1.57444	1.66105	1.36798	1.47777	1.11142	1.66276	1.96863	1.56115		0.248333
1.6308	1.22847	1.40134	1.59828	1.35078	1.55898	1.65785	1.34249		0.159926
1.06496	0.927123	1.131	1.13479	1.1637	1.08123	1.27261	1.37258		0.134512
2.42104	1.57276	2.75437	1.77297	1.91893	1.04568	1.17932	1.6718		0.577334
2.25129	1.8804	1.84147	2.01102	1.96802	1.45155	2.18084	1.61313		0.268976
1.74304	1.86333	1.83403	1.4678	1.81759	1.31875	1.79878	1.5599		0.201473
0.905557	0.82541	0.905124	0.893041	0.846756	0.914588	0.849569	0.859251		0.0335634
									0.224821

## Sheet: MaxAcc
4.50472	2.57189	2.90063	2.18284	4.82478	2.85043	3.0801	2.2129		0.995997
3.55319	2.89837	2.073	2.85427	2.67387	3.40214	2.29342	4.06003		0.663682
5.30976	3.26504	2.5257	3.92045	3.00762	3.57431	2.56424	3.13461		0.898621
1.52531	2.10776	2.69043	1.92577	1.7396	1.78522	2.77729	1.817		0.455724
5.0953	6.7097	2.26869	3.08331	6.2699	2.80423	5.18683	3.24838		1.6923
1.88876	2.21149	2.42627	2.57167	3.08462	1.4434	2.15199	2.73452		0.510634
3.38907	2.07817	1.58908	1.7926	2.96125	1.68771	1.45724	1.80054		0.700206
2.83678	4.8174	3.39614	3.44144	3.22433	3.97501	4.49888	2.89235		0.72819
2.95852	4.57059	2.83342	2.94786	1.68579	3.06349	4.31801	3.65002		0.916192
2.28585	2.92323	3.72076	3.78777	2.31154	2.71402	3.03229	3.28606		0.572482
2.68403	4.06614	2.76818	2.02161	2.72688	2.49552	4.14217	3.37446		0.757027
2.28379	3.93226	2.76383	3.26533	3.20668	1.84045	1.59105	2.35566		0.787669
2.63989	2.50291	2.54243	3.02782	3.40656	2.58854	2.40056	3.05615		0.351128
1.93092	2.38147	1.76495	2.67267	1.82472	1.42046	1.27826	1.10458		0.536981
3.95327	3.62359	3.56656	3.59848	4.03917	4.0955	4.95379	4.67031		0.511485
3.56009	2.25498	2.6332	3.86534	2.51906	4.16442	4.01575	2.2528		0.821943
1.54743	2.13231	3.42801	2.0841	2.74217	2.39609	3.46072	2.83842		0.669138
5.58319	4.3356	8.90283	4.93214	4.86057	3.21342	3.18869	3.98887		1.8287
7.05858	4.52561	5.09664	5.0924	5.44824	3.96165	5.65929	4.64191		0.929458
2.3728	3.22122	2.48683	3.44801	2.91886	1.97393	2.88664	3.61556		0.562238
1.32917	1.32278	1.8037	1.50383	1.15665	1.47626	1.34159	1.35125		0.190732
									0.874947

## Sheet: MeanGyr
71.8675	62.5264	85.1518	58.1273	81.6737	80.1144	64.8354	62.7406		10.2931
57.9531	79.6747	61.2	72.3161	74.8097	70.2509	64.4384	74.248		7.46842
95.8902	84.9779	80.9885	82.1697	67.712	75.9184	75.3995	79.0698		8.21219
35.874	43.4786	47.4051	51.2446	36.903	52.256	34.9508	36.1197		7.26246
71.0708	84.953	64.239	72.0576	71.0307	71.2394	68.0347	78.1793		6.34058
55.0124	53.1194	53.6392	56.5928	53.9134	49.9287	53.3375	53.8268		1.88377
51.6162	46.7817	44.2043	45.9947	46.125	48.7874	37.6712	50.0688		4.27229
62.3395	83.4031	59.7282	90.6986	72.5657	57.5377	65.5534	73.2855		11.7197
56.1118	83.51	68.9371	61.2222	47.7946	52.1297	59.2076	74.0254		11.9025
38.9109	66.5984	57.0698	37.625	45.6009	52.4971	80.9868	45.6138		14.7798
51.3951	38.6519	35.545	34.8175	34.3129	41.4635	35.6275	43.7664		5.90059
84.4459	85.9642	88.7811	108.471	81.4881	89.6255	75.7173	91.1075		9.5744
68.3517	96.4301	67.1166	82.7649	109.862	78.7897	79.1077	70.4492		14.8504
43.5751	38.209	37.5377	37.9885	33.0661	35.4153	36.9906	25.215		5.27564
90.6436	85.6484	80.6205	64.1629	56.5903	93.2561	97.0011	88.0371		14.3523
83.0959	64.0422	69.9389	87.4382	70.4161	81.7862	91.0658	65.8431		10.3631
47.8128	38.4003	53.1801	33.1845	49.6818	30.9223	47.303	52.6076		8.74484
104.689	69.9253	120.763	94.8625	90.2675	69.9534	65.5139	89.8242		19.1427
86.1543	78.2706	77.6456	92.1445	78.2195	65.008	93.4449	65.1562		10.8297
83.9217	86.9011	94.2683	74.4712	88.7178	77.2649	84.1111	68.1437		8.43891
24.3002	19.1834	19.4949	15.3784	18.7353	24.2469	18.6887	18.3345		3.03708
									10.4169

## Sheet: MaxGyr
158.1	128.634	122.221	108.968	139.322	140.476	123.273	128.295		14.7762
151.698	144.464	117.453	131.821	111.082	149.136	129.185	196.891		26.6943
225.535	170.454	147.941	156.487	137.109	138.63	134.424	131.243		31.2625
124.358	135.338	176.358	148.305	95.9947	168.538	129.832	78.5006		33.3832
144.332	169.058	122.086	119.455	132.891	130.462	121.588	136.878		16.3121
105.332	108.928	112.301	108.645	92.1889	74.0473	106.302	96.9802		12.6197
186.095	154.154	117.708	130.651	192.995	147.805	111.083	143.186		29.5642
174.71	196.416	153.634	227.109	156.648	147.917	197.433	178.319		26.954
134.554	176.587	165.739	167.333	129.71	127.499	196.499	190.383		27.3333
123.262	146.375	158.132	89.7054	90.9986	90.7322	256.834	106.078		56.5553
87.1734	106.108	91.0857	91.1875	104.86	90.2879	84.9131	134.722		16.4685
159.623	174.099	171.711	203.548	156.973	172.947	144.339	178.784		17.5923
147.995	178.375	114.206	163.497	218.323	143.422	149.437	120.497		33.1551
120.627	113.859	83.2484	115.877	114.787	85.6619	98.2981	102.829		14.296
162.525	139.622	133.934	121.429	129.555	160.368	154.155	136.47		15.0485
164.968	139.598	131.537	187.391	144.653	147.981	182.19	132.864		21.7524
91.6535	99.428	122.385	66.6348	93.0737	118.03	142.628	119.868		23.6305
242.189	161.372	427.464	187.252	177.345	167.036	123.902	173.057		94.7529
260.644	173.925	172.374	236.725	135.669	265.649	233.367	175.702		48.1906
152.102	175.09	178.078	177.666	159.089	145.43	174.903	201.693		17.8063
42.751	43.189	61.5737	43.6074	35.4147	51.2497	55.2249	40.9507		8.55639
									34.5162

## Sheet: RMSAcc
1.61926	1.40635	1.33146	1.32346	1.42239	1.4643	1.33122	1.23284		0.116734
1.46534	1.75924	1.22144	1.50268	1.45603	1.68932	1.30702	2.0259		0.260443
1.92061	2.14017	1.68819	1.85348	1.36476	1.75463	1.57811	1.74234		0.231048
0.835521	0.932388	1.01215	0.896098	0.870833	0.971004	0.905949	0.798779		0.0695989
2.01966	2.83235	1.46868	1.6244	2.12674	1.668	1.85605	1.77493		0.425063
1.11822	1.21193	1.27712	1.36311	1.37529	0.755909	1.22879	1.25309		0.196738
1.30807	1.13487	0.817548	0.991096	1.15984	0.882985	0.741299	1.01067		0.189916
1.55204	1.88153	1.72243	1.95071	1.71916	1.7928	1.70945	1.66322		0.125061
1.13724	1.76916	1.43205	1.36759	0.869512	1.16746	1.46011	1.42769		0.269066
1.36118	1.6276	1.4791	1.45359	1.31859	1.46516	1.61462	1.49319		0.107625
1.35089	1.46663	1.12024	1.00118	1.33381	1.31156	1.51467	1.49443		0.182228
1.47673	1.80531	1.41629	1.80461	1.48206	1.29413	1.12159	1.45193		0.2327
1.29997	1.71517	1.34847	1.79457	1.96296	1.58008	1.49551	1.41305		0.232346
0.896096	1.04383	0.907771	0.917446	0.71525	0.62523	0.613321	0.575546		0.175523
1.76741	1.88974	1.52045	1.70202	1.35843	1.83489	2.16889	1.80891		0.243184
1.73264	1.33886	1.5383	1.76481	1.47295	1.79179	1.8177	1.44579		0.184985
1.0911	1.02723	1.31676	1.19378	1.26539	1.17762	1.44165	1.4859		0.160511
2.73998	1.85287	3.50931	2.13319	2.27174	1.27078	1.33854	1.87042		0.737095
2.89712	2.16874	2.1697	2.32786	2.17787	1.80013	2.5246	1.95603		0.339585
1.78758	1.93676	1.87958	1.62217	1.89635	1.40611	1.90546	1.8852		0.184706
0.932927	0.837792	0.957581	0.910383	0.860903	0.936206	0.86995	0.881863		0.0421385
									0.27208

## Sheet: RMSGyr
80.8828	71.9155	89.8372	65.4496	90.854	89.5603	72.11	71.3156		10.0949
73.3051	90.1632	70.7202	81.6654	79.1504	83.8212	74.0371	86.0181		6.80273
106.619	101.094	89.1959	88.5683	77.2653	84.6676	85.0707	84.4		9.61396
43.6198	53.5495	59.7969	60.782	42.7987	63.9153	41.2001	41.0338		9.73403
83.0654	99.2262	74.6474	82.1425	80.5099	83.4187	77.6688	90.2742		7.70404
62.7458	61.4874	61.645	64.3022	59.5324	53.5109	61.4624	60.7576		3.21387
70.5472	61.1104	54.4751	59.669	67.6312	62.5127	46.8472	63.601		7.44994
76.6727	103.353	75.1588	110.372	88.7848	70.6153	87.2552	91.6252		13.8665
73.8961	99.9203	87.1907	79.6649	62.4288	65.082	79.195	85.0793		12.1686
46.9478	79.0769	68.3619	44.8855	52.3841	56.9048	94.3303	54.3235		17.2129
55.7662	46.9051	42.6956	42.7518	44.1489	46.4138	41.5056	53.2417		5.21295
99.9379	100.994	103.9	128.747	96.287	108.498	89.1024	108.976		11.7223
82.626	114.873	76.5756	97.0531	135.18	90.2394	90.8607	82.8481		19.5685
57.8435	50.3916	43.4777	51.4119	47.0966	44.8645	46.1625	41.3495		5.24696
99.0796	91.746	89.424	71.027	64.7345	100.952	103.38	95.8294		14.219
98.6053	75.3411	78.5145	106.27	83.4155	95.0638	107.682	75.8372		13.4574
54.4059	48.9555	64.3709	36.7342	58.8477	43.3493	55.8921	61.7647		9.44694
115.992	84.3811	146.898	105.626	103.306	75.6682	70.9686	97.1261		24.4506
119.534	92.8207	90.2679	111.784	85.8768	91.6019	113.786	82.2226		14.265
93.1781	99.7456	105.532	95.0749	100.367	89.0624	100.791	92.5873		5.4356
26.3778	21.6659	24.0769	18.7637	21.2554	27.6287	23.0605	20.9099		2.95508
									12.2155

## Sheet: SE_Acc
0.505549	0.439544	0.308899	0.507917	0.417122	0.268178	0.524944	0.382925		0.095031
0.421124	0.503758	0.346771	0.601676	0.679354	0.402864	0.60158	0.615761		0.120498
0.392185	0.391726	0.678619	0.493593	0.506515	0.334444	0.488532	0.434233		0.105147
0.404427	0.319375	0.530924	0.485067	0.385686	0.459457	0.307911	0.340895		0.0814765
0.341396	0.511787	0.448694	0.281292	0.294239	0.573346	0.238861	0.340414		0.119243
0.529463	0.450955	0.428607	0.425317	0.256769	0.406543	0.402729	0.377734		0.0766391
0.516691	0.546104	0.504287	0.502653	0.457461	0.538359	0.518539	0.563973		0.0325276
0.550046	0.376283	0.326216	0.436907	0.382457	0.420969	0.291752	0.351025		0.0794883
0.261925	0.269192	0.552631	0.302925	0.471547	0.436228	0.329226	0.418093		0.105243
0.479386	0.292113	0.477077	0.36406	0.431688	0.440083	0.465897	0.37466		0.0663515
0.485758	0.295322	0.393489	0.540603	0.393117	0.550331	0.411725	0.24316		0.109477
0.380772	0.422069	0.528067	0.528067	0.442244	0.392833	0.395156	0.493758		0.060917
0.392424	0.463063	0.454913	0.31178	0.299243	0.394553	0.50981	0.425794		0.0731
0.448784	0.408194	0.521651	0.344602	0.235352	0.476255	0.281743	0.383079		0.0972854
0.364931	0.46755	0.53456	0.379269	0.338142	0.415592	0.540517	0.408576		0.0760249
0.274168	0.219651	0.272526	0.380401	0.303329	0.331606	0.47798	0.518206		0.104741
0.370713	0.418952	0.456539	0.427776	0.261589	0.491313	0.471347	0.496663		0.0777974
0.634277	0.543691	0.221916	0.367974	0.431816	0.436793	0.631272	0.385387		0.14075
0.228411	0.51865	0.456804	0.492935	0.625827	0.267848	0.499425	0.407381		0.132417
0.385504	0.109883	0.384309	0.256692	0.456237	0.332767	0.397918	0.351682		0.107391
0.407407	0.390924	0.26812	0.273957	0.402642	0.468398	0.306829	0.494218		0.0855776
									0.0984125

## Sheet: SE_Gyr
0.282604	0.238843	0.176175	0.253091	0.131259	0.180112	0.274851	0.266879		0.0557062
0.170976	0.344234	0.269248	0.292904	0.354955	0.162935	0.320001	0.489104		0.105265
0.28833	0.322425	0.466411	0.375417	0.320472	0.376905	0.263438	0.418249		0.0680153
0.23585	0.130613	0.182454	0.146438	0.159278	0.181725	0.243784	0.197575		0.0402182
0.264784	0.304445	0.309246	0.158577	0.268419	0.19671	0.25894	0.200409		0.0542274
0.322288	0.371564	0.370261	0.292637	0.292388	0.164381	0.326822	0.291551		0.0651626
0.121231	0.22148	0.175633	0.206009	0.0928753	0.109715	0.181841	0.159332		0.0465037
0.447513	0.200765	0.17685	0.298969	0.276351	0.313942	0.142461	0.212807		0.0973277
0.0553936	0.199567	0.177696	0.151825	0.14742	0.178514	0.140504	0.242656		0.0542192
0.239377	0.208889	0.346362	0.292212	0.215616	0.181642	0.466455	0.140822		0.104509
0.413143	0.205599	0.371507	0.333441	0.34593	0.298168	0.38389	0.17897		0.0841847
0.160469	0.325241	0.282522	0.205339	0.195123	0.142764	0.226616	0.218358		0.0602054
0.188794	0.140787	0.130401	0.245367	0.128141	0.221121	0.245673	0.108865		0.0560386
0.124496	0.130059	0.238717	0.0846816	0.103939	0.124227	0.142174	0.0375044		0.0572617
0.2724	0.270836	0.247292	0.305676	0.181021	0.293348	0.388904	0.167117		0.0705495
0.208922	0.190367	0.315209	0.190669	0.194706	0.218779	0.28	0.252067		0.0465476
0.110974	0.146877	0.355102	0.25028	0.16053	0.109865	0.395918	0.283563		0.111294
0.372653	0.346084	0.333269	0.23484	0.272165	0.323889	0.422285	0.442145		0.0698767
0.0584962	0.314643	0.300337	0.292174	0.40016	0.119623	0.346805	0.21259		0.116638
0.181346	0.141484	0.274779	0.110305	0.209792	0.147842	0.0994408	0.116281		0.0593391
0.289715	0.191887	0.141134	0.174744	0.319115	0.277331	0.107569	0.233508		0.0753791
									0.0766364
