# Supplementary material for: Reliability and Discriminative Validity of Wearable Sensors for the Quantification of Upper Limb Movement Disorders in Individuals with Dyskinetic Cerebral Palsy
Source: Sensors (Basel). 2023 Feb 1;23(3):1574. doi: 10.3390/s23031574 (PMC9921560; doi:10.3390/s23031574)
Supplement: Supplementary file 1 [file sensors-23-01574-s001.zip › sensor_parameters_short_upperam_RS.xls]

## Sheet: MaxJerk
28.6136	10.2917	17.9567	37.0456	10.8154	8.24832	17.2636	17.9773		9.85497
50.8667	35.8592	22.5279	46.8278	25.257	48.5827	24.1389	31.1545		11.6907
98.6991	32.3206	47.0103	46.696	54.882	63.2295	17.9818	44.907		23.7543
36.6136	22.8504	31.744	14.6532	47.7776	34.8288	32.4945	33.0305		9.73739
19.3886	28.0521	30.9555	19.1594	27.4104	16.7477	20.8898	46.892		9.77734
17.1507	36.2271	9.64211	14.7461	36.4988	21.9752	20.5407	10.401		10.4774
50.9821	50.4259	39.8079	38.1331	19.9795	40.5458	43.4705	58.4093		11.4999
28.4012	15.8073	23.3742	45.6435	28.4864	38.2808	35.6727	16.726		10.4514
72.0776	59.178	43.5012	62.9942	23.0329	37.568	72.5624	64.52		17.8384
35.7119	19.144	13.7506	11.9898	25.6896	21.0604	24.5176	24.357		7.47197
21.5257	6.98759	23.0728	21.4281	36.4878	5.95467	39.5342	20.4273		11.978
30.487	30.9468	16.3356	25.873	23.9165	15.8055	30.2435	16.6723		6.67676
42.3821	34.4773	35.33	33.3086	30.8248	26.1056	41.0043	40.2455		5.55692
26.2812	22.0856	20.6165	14.5528	16.9665	8.75998				6.16732
67.3773	66.0837	96.0971	88.1648	73.0245	67.0021	60.9458	61.3793		12.858
32.0748	24.0225	26.3259	46.3657	54.8645	24.4193	40.2843	41.3474		11.3167
47.8786	23.0017	36.8621	51.8976	17.5495	25.1705	17.057	28.7365		13.2792
135.449	89.2158	150.266	73.5741	88.7395	110.512	107.289	56.6102		31.0624
56.1644	36.8209	30.42	70.7697	36.9095	57.7457	71.6948	34.8871		16.7086
27.3293	38.471	49.1078	21.0267	14.6308	13.0812	28.5187	43.7823		13.2938
13.3279	12.805	14.5794	12.2062	13.7003	14.9901	14.6028	9.08082		1.90643
28.6136	10.2917	17.9567	37.0456	10.8154	8.24832	17.2636	17.9773
									13.9012

## Sheet: MaxAnfJerk
22583.2	15158.2	11373.6	78634.9	12904.6	4044.52	7301.06	30382.5		24065.2
56463	66917.2	100231	174349	81997.2	131312	65984.5	104470		39564.6
309403	41747.5	161520	158096	412388	329649	125620	327905		128281
44052.6	37385.4	11533	32130.5	18293.4	49031.6	12176.8	19038.7		14644.4
9189.2	53930.1	21518.7	9698.89	32318	54135.2	32207.4	78981.4		24331.1
38578.2	61410.2	10388.8	19539.2	87820.9	31514.2	67887.8	8130.64		29043.4
90708.1	42841.4	76290.9	75443.3	20040.9	82421.9	43887	96321.1		27077
34820	22130.8	20815	15158.3	15049.7	44177.4	37256.8	40604.3		11753.1
76956	134611	123991	34713.2	57290.5	61636.4	203650	64099		55630.4
23214.7	30909.9	50377.6	32415.1	19210	25419.3	37252.8	18873.6		10563.2
23793.9	28372.7	12267.1	86830.7	129694	12755	109206	26053.4		47278.6
40359.7	105231	125099	83970.6	17009	20447.4	99521	63920.9		40568
36724.7	18844.5	206895	87052.2	98177.2	151314	111880	70321.2		60708.2
28836.9	30529.1	12850.4	83566.1	15673.2	10613.6				27369.5
97651.7	158859	394826	25622.7	73879	56422.4	343502	245345		138619
259079	95342.8	73893.6	134102	91559.4	74121.1	171073	105623		62966.6
139850	32422.7	80084	41448.5	19638.8	23168	76882.8	49584.6		40048.9
76054.5	603603	690332	127817	310191	178062	381221	133838		230600
153512	21973.9	55428.2	193123	28246	89040.4	149245	50114.2		64755.3
241823	77577	123475	240971	14432	53165.7	95080.2	256382		95293.8
13773.2	11655.3	8181.6	14733.7	29103.3	24101.4	12699.7	14487		6938.6
22583.2	15158.2	11373.6	78634.9	12904.6	4044.52	7301.06	30382.5
									78716.6

## Sheet: MeanAcc
1.29456	1.18077	1.63038	1.38259	1.1475	1.27727	1.21196	1.26801		0.152483
1.63592	1.17693	1.23742	1.47803	1.31906	1.59558	0.991012	1.10715		0.233454
2.15264	1.39568	1.5721	1.72551	1.79374	2.06454	1.40222	1.80317		0.278646
1.20938	0.904502	0.850674	0.832127	1.17139	1.18906	1.06686	1.057		0.154183
1.55248	1.3405	1.43805	1.24032	2.00588	1.42871	1.28962	1.72918		0.255558
0.915294	1.32231	0.935791	0.976773	1.99577	1.6781	1.42807	0.977318		0.401702
2.15157	2.71681	2.20498	2.59605	1.95342	2.4817	1.90006	2.26622		0.293883
1.4335	1.46858	1.2797	1.52424	1.40188	1.48592	1.40521	1.287		0.0886321
1.92668	1.93952	2.14128	1.87684	1.2442	1.59282	2.19852	2.173		0.326816
1.24123	1.24981	1.25276	1.29981	1.51124	1.45191	1.6179	1.27602		0.14452
0.929032	0.822037	0.950398	0.882029	1.02983	0.980461	1.16984	0.919841		0.10495
1.2682	1.1554	1.16329	1.11252	1.34843	1.41461	1.31061	0.909212		0.160212
1.94512	1.8811	1.87975	2.06456	2.29155	1.77932	2.3899	2.13681		0.214902
0.863493	0.798743	0.759151	1.10907	1.14083	0.991639				0.161251
2.73833	2.69462	3.33184	1.9761	3.13408	3.25768	2.92302	3.06989		0.434218
1.49129	1.21143	1.32575	1.82655	1.53613	1.46199	1.54064	1.75802		0.202993
1.53977	1.30981	1.7213	1.65854	1.45844	1.51435	1.44509	1.70203		0.142614
4.0952	2.17529	4.55778	1.98113	2.53788	2.43732	1.91348	2.37379		0.99875
1.68894	1.619	2.23433	2.49008	1.64147	1.56679	2.32711	1.38376		0.414478
1.74594	1.94877	1.96821	1.81372	1.66933	1.91019	1.54638	1.82747		0.145267
0.827531	0.752305	0.824796	0.801195	0.94295	0.982179	0.778827	0.801571		0.0807164
1.29456	1.18077	1.63038	1.38259	1.1475	1.27727	1.21196	1.26801
									0.330426

## Sheet: MaxAcc
2.35829	2.32124	3.41986	3.86622	1.96498	1.9072	2.35504	2.41322		0.695396
4.37033	2.61176	3.47424	3.11652	2.66701	3.01209	2.82888	2.25534		0.648924
5.90528	2.98211	4.88278	6.59852	3.92046	4.06853	3.74071	5.3067		1.21489
3.17227	2.27617	2.56165	1.7218	3.19158	2.9011	2.22706	2.3154		0.513022
2.31894	2.67442	3.06501	2.01295	3.6639	2.17773	2.3117	3.88627		0.70492
3.78643	5.12278	2.56213	3.51731	7.49421	4.21835	4.63594	2.26416		1.64581
4.31457	4.43219	4.31636	5.27038	3.1886	3.96164	4.49064	7.01554		1.12639
3.59841	3.44182	2.78767	4.41788	4.16825	4.95338	4.25593	2.31282		0.881079
4.25774	5.1324	4.27001	5.97294	2.99696	3.02428	4.8553	5.45347		1.07923
2.84605	2.36433	2.31008	2.45802	2.9291	2.64671	3.31858	2.44332		0.346076
2.49442	1.6778	2.14685	2.34961	2.38831	1.8182	2.39895	2.32682		0.297965
2.63953	5.05034	3.34553	2.11482	2.36171	2.05238	2.97863	2.09476		1.00925
5.36712	4.48332	5.59706	7.61667	4.76346	3.01457	4.39695	4.19293		1.34046
2.85162	1.98876	2.44961	2.77195	2.18319	1.67081				0.459032
5.22502	4.70897	6.1538	5.00168	5.61883	5.60336	6.08312	6.18652		0.556907
3.39451	3.02042	2.67131	3.858	4.78999	2.94298	2.91465	3.60607		0.687003
4.29958	2.41926	3.07823	3.85365	2.90944	3.03334	2.35639	3.07272		0.661072
8.30921	5.35291	10.0615	4.36571	7.31956	7.34538	7.39149	7.32463		1.72994
5.50431	4.01938	4.82835	6.22944	3.84343	4.2658	5.82933	3.80751		0.95572
4.48564	4.07491	5.9536	3.85838	2.97424	2.96743	2.90016	3.01817		1.06768
1.61932	1.61823	1.22427	1.4262	1.70405	1.97619	1.45882	1.35505		0.23377
2.35829	2.32124	3.41986	3.86622	1.96498	1.9072	2.35504	2.41322
									0.964721

## Sheet: MeanGyr
61.834	72.2145	79.0147	69.7558	47.273	73.0638	88.2797	52.8473		13.5029
84.2476	71.0487	68.8482	79.8986	79.9228	72.724	68.2184	70.2825		6.06796
113.153	90.0871	91.302	97.3903	91.1983	100.474	85.8031	87.7659		8.89116
73.3338	58.9729	41.8706	47.8484	50.9635	48.8553	46.1552	55.053		9.79665
105.291	106.441	104.73	100.68	112.457	83.7741	104.603	106.85		8.46703
66.8505	78.5092	74.8415	71.7955	92.1378	96.491	81.6137	76.947		10.0013
108.205	118.32	100.462	112.735	105.049	124.846	107.948	92.5628		10.0846
82.388	70.4199	62.1059	64.2646	49.4189	42.8639	45.6358	74.2551		14.3001
89.3977	83.6091	90.389	91.0355	75.834	72.2982	93.8941	93.5311		8.2072
74.1138	79.3583	77.0369	67.23	87.8031	60.9619	83.0908	43.7743		14.1277
40.8143	46.1768	41.3332	47.2351	48.9615	50.9617	45.3727	47.7436		3.52552
86.8488	93.621	82.4999	94.808	91.8116	93.2815	92.6819	82.7898		5.00423
104.067	110.78	102.558	109.182	126.3	72.823	117.346	109.171		15.5743
41.9238	48.7689	53.755	40.7646	60.0082	43.5083				7.5798
149.568	130.656	185.814	114.652	146.554	153.299	146.832	155.249		20.4558
57.8907	68.2893	58.523	82.2531	61.874	65.8158	68.7748	72.87		8.05723
69.3206	74.9425	66.9499	85.9966	75.4144	54.8006	53.171	98.8041		15.1953
169.603	122.186	185.027	110.079	132.069	93.3178	94.9836	102.13		34.4132
94.01	85.2497	96.0023	113.166	93.7278	76.4183	118.698	76.9284		15.3898
102.466	101.481	110.768	102.165	115.635	108.943	90.3621	121.776		9.71999
25.2614	25.0685	27.6237	29.8463	29.441	32.3012	25.7059	21.5273		3.39862
61.834	72.2145	79.0147	69.7558	47.273	73.0638	88.2797	52.8473
									13.6344

## Sheet: MaxGyr
162.476	157.191	201.686	192.472	141.265	141.542	157.121	134.24		24.3832
149.842	124.707	124.501	154.437	186.44	173.896	113.054	129.359		26.0772
194.415	158.305	141.038	154.432	184.028	195.309	143.414	149.214		22.6518
145.658	125.28	97.7938	90.132	107.481	106.071	115.497	106.784		17.2544
211.682	196.852	195.206	187.84	222.574	173.866	204.243	197.505		14.7404
113.377	144.374	129.703	126.353	191.639	164.843	136.403	130.21		25.0058
216.946	248.924	223.462	263.902	212.436	250.824	204.935	243.533		21.3686
288.5	217.455	135.992	208.606	171.617	236.376	175.813	142.602		51.0601
235.522	177.465	191.879	181.268	156.095	160.92	152.392	212.796		29.0436
128.214	154.946	145.028	148.237	155.204	172.764	192.658	106.621		26.1096
97.2145	92.6015	110.445	97.5237	123.647	100.927	107.502	138.331		15.5013
166.166	164.478	186.015	185.613	197.287	205.23	203.547	169.388		16.5813
181.483	193.146	181.163	220.572	242.184	183.94	223.875	184.228		23.9347
110.994	90.2645	157.259	126.187	170.317	86.5502				34.5398
229.624	243.692	310.29	208.342	296.219	289.938	248.729	280.574		35.9578
112.244	128.869	127.535	153.597	118.826	125.995	145.188	130.763		13.3656
192.973	135.295	176.106	253.255	179.094	141.756	136.059	231.208		44.0141
280.763	186.029	330.526	234.604	234.12	270.346	317.129	184.948		54.7454
196.384	173.883	219.908	269.517	172.948	139.791	275.191	177.066		48.3801
198.252	179.042	168.481	180.459	181.318	167.229	164.071	190.012		11.7733
67.7317	74.346	63.0897	62.1737	67.4195	64.9426	51.5808	64.219		6.44162
162.476	157.191	201.686	192.472	141.265	141.542	157.121	134.24
									30.5979

## Sheet: RMSAcc
1.38479	1.30364	1.80795	1.65833	1.21057	1.33059	1.34786	1.34785		0.201506
1.87215	1.29258	1.4346	1.63127	1.40408	1.70708	1.14168	1.25387		0.249417
2.55451	1.52763	1.94475	2.29398	1.9766	2.30819	1.53713	2.18173		0.368343
1.37113	1.03857	0.966889	0.893664	1.28781	1.31395	1.13806	1.11941		0.171915
1.62371	1.46493	1.56161	1.31146	2.15455	1.49246	1.3418	1.87541		0.284116
1.23166	1.74366	1.07127	1.17513	2.60909	1.83035	1.73988	1.06051		0.532382
2.38668	2.86501	2.42564	2.81832	2.12329	2.696	2.14442	2.58499		0.284523
1.67508	1.68803	1.40114	1.80778	1.60075	1.75058	1.53693	1.37198		0.157942
2.12251	2.25351	2.36953	2.27723	1.38913	1.73942	2.37022	2.46096		0.370833
1.44292	1.3919	1.41135	1.39797	1.64521	1.53935	1.74004	1.34251		0.140044
1.00153	0.907957	1.05411	1.00459	1.13398	1.02094	1.23616	1.04935		0.0979423
1.40511	1.44772	1.33326	1.23825	1.44021	1.48086	1.43177	1.0461		0.146186
2.17584	2.16149	2.10748	2.55329	2.5833	1.87404	2.66419	2.37573		0.276394
0.9947	0.906899	0.929867	1.23695	1.22927	1.01862				0.145601
2.94093	2.85613	3.59014	2.11249	3.39538	3.46023	3.06534	3.33116		0.473822
1.64788	1.44991	1.44499	2.00962	1.81341	1.61496	1.67891	1.92202		0.205615
1.70502	1.40884	1.86898	1.79845	1.54846	1.63675	1.51276	1.84004		0.166834
4.4741	2.5144	5.03131	2.24944	3.00986	2.79899	2.47524	2.94847		1.00959
1.95262	1.80875	2.44521	2.79839	1.78357	1.79821	2.56973	1.57176		0.447807
2.02847	2.17846	2.42393	2.01407	1.8196	2.0062	1.68493	1.94722		0.222289
0.860099	0.802869	0.845724	0.84367	0.979548	1.0438	0.817946	0.827505		0.0863059
1.38479	1.30364	1.80795	1.65833	1.21057	1.33059	1.34786	1.34785
									0.360213

## Sheet: RMSGyr
79.7316	86.2039	100.553	87.5484	61.7087	83.5701	99.1623	65.3818		14.0153
93.1289	78.627	75.2982	87.9969	90.9505	81.9977	74.0144	76.1351		7.50057
119.902	97.9361	97.3186	104.566	101.707	108.867	93.7806	94.3673		8.7653
82.7996	68.7715	51.838	54.471	58.0607	55.2827	58.6189	65.4673		10.1592
121.824	121.327	119.269	116.603	130.744	100.158	121.513	121.982		8.67762
73.6928	87.8578	82.9345	80.0774	106.533	106.976	89.4282	84.8391		11.9526
125.754	135.569	120.161	134.911	120.617	142.322	121.433	112.85		9.93098
106.049	91.7186	71.6353	82.3631	64.3649	69.1173	59.8107	83.9178		15.4091
110.925	93.5869	103.998	104.873	83.2462	83.0691	103.41	110.44		11.2312
82.397	90.7142	88.6178	81.6634	98.688	73.2936	101.917	52.0867		15.7817
50.5299	49.8991	48.912	51.6425	59.2702	57.1962	52.5161	55.1665		3.70254
97.4096	105.684	98.2228	108.388	107.707	110.921	107.98	96.0118		5.85759
115.666	123.688	115.238	125.548	144.902	91.4288	132.083	120.704		15.3905
51.8286	54.8766	65.4361	51.4181	80.0085	50.244				11.7078
158.84	148.998	200.238	128.409	169.387	169.156	159.645	172.572		20.6217
65.8718	76.0564	68.7034	91.1564	68.3126	72.8219	76.0939	79.1393		8.03995
82.9163	83.5526	84.4241	107.345	87.9218	69.879	62.5778	118.511		18.2535
179.358	129.942	199.156	125.313	141.338	112.13	124.509	111.469		32.0635
100.734	94.7333	113.984	135.398	108.037	86.5842	132.098	89.1097		18.5552
114.752	108.754	116.056	113.311	122.329	117.535	102.432	129.315		8.13773
31.0217	30.6466	31.7691	33.8959	34.2767	36.938	28.653	25.9607		3.4366
79.7316	86.2039	100.553	87.5484	61.7087	83.5701	99.1623	65.3818
									14.2436

## Sheet: SE_Acc
0.387252	0.320908	0.359414	0.273855	0.376775	0.314009	0.252104	0.4109		0.0561286
0.567345	0.499198	0.52038	0.515413	0.606622	0.373283	0.376659	0.54775		0.0846013
0.331832	0.288415	0.381614	0.119214	0.485824	0.329524	0.373639	0.33301		0.103524
0.26417	0.342476	0.33235	0.429563	0.283595	0.529746	0.398206	0.455966		0.0905299
0.526093	0.411176	0.404556	0.417441	0.550274	0.250954	0.345401	0.293305		0.103862
0.195021	0.21664	0.435725	0.163414	0.214739	0.273745	0.120064	0.175071		0.0964722
0.299517	0.634058	0.441586	0.538428	0.367534	0.406703	0.397728	0.403098		0.10452
0.371455	0.319321	0.310998	0.238673	0.262906	0.245817	0.28583	0.482987		0.0807268
0.473933	0.278294	0.390281	0.321824	0.348887	0.542949	0.506793	0.592987		0.113384
0.25388	0.242782	0.395052	0.238528	0.376355	0.426084	0.453132	0.368424		0.0865098
0.385279	0.200236	0.303646	0.223207	0.310602	0.261734	0.478609	0.241638		0.0925952
0.500961	0.345714	0.409311	0.358398	0.552695	0.404126	0.645606	0.425832		0.103364
0.468182	0.283042	0.310613	0.251782	0.350579	0.268699	0.414682	0.430511		0.0818224
0.472959	0.316601	0.366644	0.438571	0.222451	0.347219				0.089376
0.473603	0.586463	0.653027	0.370645	0.62253	0.463131	0.494019	0.684258		0.109265
0.449397	0.322773	0.327792	0.355533	0.381141	0.456758	0.507487	0.331865		0.0705114
0.489362	0.514522	0.448411	0.445656	0.450056	0.396163	0.47856	0.499547		0.0378606
0.486434	0.501069	0.660141	0.565917	0.485073	0.431345	0.351997	0.590765		0.0960605
0.45211	0.357633	0.348441	0.339388	0.531847	0.460098	0.410623	0.409932		0.0660465
0.482655	0.509559	0.366596	0.364528	0.302517	0.315949	0.389812	0.546544		0.0914892
0.458721	0.3372	0.53443	0.440798	0.405135	0.440608	0.428193	0.431086		0.0548122
0.387252	0.320908	0.359414	0.273855	0.376775	0.314009	0.252104	0.4109
									0.0906492

## Sheet: SE_Gyr
0.124685	0.189972	0.112771	0.200456	0.128545	0.135026	0.143432	0.164227		0.0318488
0.406264	0.272206	0.320265	0.370374	0.456758	0.392739	0.252541	0.403401		0.0711096
0.582482	0.355164	0.465569	0.470479	0.383515	0.404136	0.24578	0.320616		0.10341
0.285929	0.208297	0.120065	0.226598	0.265576	0.405303	0.129269	0.127407		0.0983616
0.192531	0.195083	0.228554	0.135156	0.187212	0.199682	0.208624	0.23469		0.0304696
0.259001	0.212371	0.247781	0.206938	0.275012	0.278113	0.270961	0.250161		0.0272855
0.307134	0.25641	0.311747	0.298153	0.217758	0.26385	0.262792	0.285625		0.0314553
0.154525	0.157691	0.276842	0.133453	0.12624	0.0969833	0.168951	0.211288		0.0559967
0.329495	0.308372	0.39011	0.347428	0.288361	0.250351	0.343187	0.286036		0.0437551
0.229668	0.22932	0.217115	0.161798	0.208605	0.155641	0.208913	0.170779		0.0302985
0.12519	0.265301	0.153975	0.261079	0.218038	0.1604	0.35546	0.201239		0.0749273
0.306413	0.264981	0.212112	0.330007	0.17549	0.224048	0.22189	0.33015		0.0587407
0.190044	0.328925	0.271449	0.405465	0.388487	0.0955752	0.448859	0.301516		0.117431
0.184413	0.201557	0.0989171	0.266072	0.0650369	0.186749				0.0731224
0.309422	0.286769	0.455326	0.279314	0.305014	0.422232	0.360543	0.405465		0.0677085
0.281412	0.356165	0.310073	0.410312	0.396855	0.349051	0.480326	0.393518		0.0622221
0.288081	0.194156	0.240371	0.125613	0.202941	0.13788	0.263389	0.377186		0.0825016
0.62253	0.480463	0.486176	0.450041	0.437668	0.383924	0.307508	0.488847		0.0909679
0.259903	0.244684	0.276034	0.260086	0.211262	0.239329	0.246439	0.252702		0.019007
0.358778	0.420601	0.440403	0.239738	0.263886	0.215111	0.278117	0.36137		0.0846324
0.141805	0.187802	0.122322	0.216991	0.296106	0.332209	0.302777	0.113951		0.0869464
0.124685	0.189972	0.112771	0.200456	0.128545	0.135026	0.143432	0.164227
									0.0713767
