# Supplementary material for: Reliability and Discriminative Validity of Wearable Sensors for the Quantification of Upper Limb Movement Disorders in Individuals with Dyskinetic Cerebral Palsy
Source: Sensors (Basel). 2023 Feb 1;23(3):1574. doi: 10.3390/s23031574 (PMC9921560; doi:10.3390/s23031574)
Supplement: Supplementary file 1 [file sensors-23-01574-s001.zip › sensor_parameters_short_wrist_RF.xls]

## Sheet: MaxJerk
128.013	55.7932	39.0005	32.1879	101.507	74.2168	76.0709	101.961		33.2304
36.0604	44.1086	47.6003	50.5473	51.9676	71.1101	41.8129	35.6161		11.3544
34.2914	44.0376	41.0387	79.6122	35.4203	70.1725	55.233	66.1216		17.1641
65.0356	40.6926	44.6012	33.4058	48.6977	18.3565	20.2547	36.6751		15.2038
58.3987	41.5096	67.3506	38.0642	53.074	71.1618	54.6966	57.3089		11.3574
24.2351	50.8328	27.795	25.2216	50.0197	58.5035	22.4019	45.3048		14.5558
52.9509	55.8929	30.4879	62.0982	41.858	39.1983	67.0565	32.1665		13.7354
91.8542	65.3314	94.6943	37.547	55.258	107.16	74.632	64.0342		22.9946
53.1746	74.7612	72.0346	58.2813	46.6387	42.7937	49.3428	49.4779		11.7771
68.3352	49.0928	66.4926	63.1303	78.0446	63.6789	43.0301	69.7194		11.3646
32.8708	44.5076	20.7942	30.6737	89.0719	41.1525	31.2633	22.4647		21.7574
60.831	90.3047	75.0388	77.3944	104.11	62.2899	75.418	67.7839		14.5417
71.9535	113.297	49.4457	126.538	104.835	98.4896	119.554	74.0224		26.9581
52.1632	54.5098	23.8634	26.3584	50.7817	19.7065	44.4276	34.2858		13.9444
175.529	79.9761	109.667	110.962	122.695	99.6075	164.982	190.626		40.005
43.4942	109.343	91.1061	89.8488	86.1567	87.7517	68.138	39.0762		24.6369
17.0471	92.4712	23.2527	24.0873	44.9973	24.57	33.924	41.9767		24.1382
196.793	124.718	100.865	164.391	190.555	155.243	111.636	139.763		35.1867
49.6375	75.8509	74.4428	103.6	82.5017	136.235	90.2968	98.6445		25.3979
48.0785	59.5328	36.4072	64.3437	74.0504	33.526	34.5811	57.0378		15.1894
41.229	39.8702	42.462	51.8527	39.0366	72.3361	64.0172	47.6501		12.3091
									22.0755

## Sheet: MaxAnfJerk
32808.7	55091.9	46968.2	60297.4	62608	110716	41391.8	42473.1		24113.5
344862	262889	118192	159302	95976.1	315961	106364	107383		102756
249359	469268	373036	1.2213e+06	72737.5	268596	261855	373801		347621
50116.7	48950.8	49648.2	56345.4	11584.4	24782.7	32025.4	20533.5		16646.3
57384	147535	107991	43889.7	60386.3	82269	146403	121652		40816
127487	163886	128579	86500.6	182754	109103	73605.7	51327.1		44616
70072.8	19466	52665.8	58361.2	22125	72290.5	92515.7	16437.2		28330.3
173346	443791	430033	175235	95100.8	285104	230747	174927		126861
160621	56754.8	233056	138575	55370.4	38980.8	166804	120988		67288.2
47801.7	32268	90248	31087.3	45995.1	19761.6	21324.5	12017.5		24654.1
15850.4	79303.3	75386.1	59752.8	245926	86456.8	42849.5	14902.3		73377.7
354131	243480	360977	468740	381526	294343	213553	565597		115837
141297	246026	18621.2	68607.4	44755.2	67746.8	33042.2	40108.3		75929.3
19681.9	32348.1	59181.7	43995.4	107895	42500	84171.1	54198.4		28542.8
145294	230701	130628	574841	358721	72828.1	592783	396191		200603
201688	305524	151879	253639	446273	108515	388416	317735		115620
61953.4	324712	191931	23038.2	69658.9	55644.9	49383.9	554916		186486
90993.6	292388	287843	266275	130014	316743	297776	722251		189925
12815.7	83187.9	57801.8	49424.8	43646.8	42195.1	50477.8	66959.6		20456
58228.1	149352	37257.6	187757	243318	38627.1	41570.7	66806		79799.1
16798.5	61136.2	66389.2	47754	47421.9	34165.9	72448.3	36478.8		18540.5
									125482

## Sheet: MeanAcc
2.04096	2.15135	1.66936	2.62691	2.37661	3.03961	2.71089	2.21764		0.430748
2.97822	2.42241	2.86132	3.37504	2.50688	3.14928	3.16375	2.18686		0.417048
3.2094	2.86012	2.61032	3.14266	2.62424	3.19416	3.25004	3.03401		0.261174
1.31159	1.17573	1.15749	1.12701	1.15361	1.45645	1.15828	1.14017		0.115019
4.25204	3.28607	4.16185	3.88237	3.74361	4.61752	3.80072	3.60364		0.414724
2.03288	2.07408	2.19752	1.88931	2.10198	2.40581	1.92133	2.21614		0.168109
2.50187	2.30576	2.66039	2.4992	2.44656	2.30119	2.86853	2.40765		0.189046
3.87116	2.62148	3.31836	4.43949	3.22748	3.49834	3.36942	3.76888		0.532805
1.82748	2.42951	2.27047	2.497	1.73921	1.80833	1.9035	1.9054		0.3022
2.30745	1.65124	2.60622	1.62723	1.96767	1.87027	2.27458	1.95312		0.34012
1.8305	2.2689	1.31497	1.46561	2.18136	1.88683	1.96011	1.81687		0.323717
3.35849	3.76253	3.37798	3.54572	3.50895	3.31475	2.96116	3.27458		0.233351
3.07362	3.66081	2.77753	3.27077	3.73639	2.86871	3.17752	3.32371		0.341141
2.26531	1.62747	1.8456	1.42188	1.99658	1.92918	1.89428	1.66517		0.258069
8.05955	7.20354	7.82042	4.8384	6.35441	6.491	5.93271	7.91846		1.12945
2.46323	3.26295	3.37867	3.51142	4.10373	2.22482	4.25318	3.31857		0.70322
1.16835	2.36834	1.38569	1.56089	1.44344	1.17818	1.49596	1.63064		0.377575
5.36506	5.73016	4.30554	6.16444	7.566	7.46712	4.15278	7.70772		1.42835
3.85033	3.71557	4.66802	4.12814	5.73922	5.40984	5.19695	5.00496		0.750362
3.06366	3.45908	2.96638	3.49537	3.5397	2.11786	3.19782	3.91507		0.53749
2.48633	2.33101	2.39941	2.42803	2.8106	3.80968	3.75236	2.50283		0.612982
									0.578387

## Sheet: MaxAcc
8.0686	4.21855	3.43307	4.01036	6.81684	5.92236	5.50514	8.26535		1.83861
7.0232	4.94914	10.3547	8.11735	4.41157	6.17262	5.52582	6.9616		1.90851
5.95561	5.97401	12.8009	10.3476	4.40893	5.65585	7.82723	10.1393		2.92141
4.4678	3.88169	4.35321	3.39849	3.90668	2.85406	3.00548	3.28123		0.601274
6.84314	9.06952	10.7252	5.67948	9.79405	12.7255	9.54412	11.2184		2.29181
11.276	12.6346	12.5537	8.86244	11.1292	9.01093	8.72999	9.99596		1.60595
5.48719	5.03956	5.85829	5.73398	5.65255	5.41007	6.00629	5.00434		0.363327
8.52505	5.97478	9.7853	7.62787	7.61031	8.78111	7.46824	9.74806		1.28254
4.97064	6.79099	5.86074	4.92951	3.38101	4.66985	4.15418	4.54522		1.03826
5.30776	4.80066	5.45711	4.78296	6.77488	5.58308	3.82746	5.36566		0.839914
5.4197	7.24425	3.9565	4.75895	6.35442	5.60167	4.89865	4.8874		1.02548
11.352	14.9849	12.2339	12.5007	13.2563	14.105	11.6063	13.969		1.29062
11.6898	13.3293	12.9797	11.5029	12.2564	8.51962	10.5208	10.8603		1.52971
3.48675	4.60214	2.93787	2.78425	5.23876	3.9556	3.35858	3.66863		0.828601
14.159	14.3626	12.7608	10.4389	11.1141	10.9956	13.0949	14.9481		1.7167
5.25464	9.84835	8.57001	6.89178	7.6443	7.90454	7.82342	5.86328		1.46552
2.90142	9.344	3.31492	3.019	4.44757	2.49755	4.35764	3.45419		2.19926
15.1724	11.9955	8.13816	13.2726	16.1255	11.9841	11.1898	11.423		2.48552
7.16043	7.54816	9.32612	8.72232	8.82568	11.7394	8.55344	8.72208		1.37534
6.56367	7.8074	6.69119	11.5774	9.25477	5.63521	6.35718	9.42203		2.0156
5.65732	4.86892	5.55395	5.48111	5.56208	9.56346	7.73583	5.94639		1.56157
									1.69642

## Sheet: MeanGyr
99.0751	90.2028	64.9314	123.505	115.598	129.295	114.33	116.361		21.0394
101.801	76.3136	106.053	104.22	89.1661	110.868	91.9809	87.1409		11.6632
91.1863	89.8737	75.9036	96.7336	83.1474	106.015	81.9221	83.8757		9.52881
42.6548	50.5238	43.9778	44.1127	48.4328	51.913	38.1482	45.1524		4.49396
93.7686	71.8413	97.7241	81.2658	86.8264	117.019	90.4361	80.1377		13.7182
63.527	52.6019	63.2392	62.7361	59.1144	54.188	63.4154	61.7319		4.3808
88.8303	86.1136	90.4606	82.1703	81.3984	64.2823	101.267	81.6508		10.4876
76.6691	87.0954	86.1634	121.924	93.2134	93.8398	89.9019	87.8525		13.1747
84.3656	93.4728	71.9602	85.6954	57.7223	63.9962	69.2693	65.3029		12.4822
55.4616	41.7095	57.8625	47.4644	46.7454	53.794	65.8615	52.6603		7.48677
47.659	62.0036	39.006	45.4242	65.8893	58.4048	68.9848	45.6806		11.0648
94.2176	106.147	112.109	97.6455	100.338	80.7607	100.78	92.936		9.37918
110.352	121.034	95.6818	107.525	112.158	94.7714	97.2373	97.0392		9.68239
80.6583	46.7649	68.8732	48.3147	56.6257	62.2147	44.1	43.243		13.419
219.912	188.226	208.855	207.417	192.221	184.9	200.212	222.055		14.0038
102.393	108.395	99.8175	124.183	130.517	96.0522	121.377	110.936		12.4656
74.3341	90.4372	35.0596	49.8229	65.0854	50.6539	60.5706	81.966		18.3459
129.771	159.328	183.036	124.737	212.382	237.561	171.757	290.681		56.181
134.811	110.625	140.302	124.1	137.003	137.959	135.69	154.355		12.681
113.09	116.014	92.1801	82.9125	110.078	67.8319	91.7094	109.227		17.0511
63.9903	61.1075	63.7641	67.8605	75.4793	80.0825	80.7742	66.8493		7.71219
									17.6523

## Sheet: MaxGyr
238.378	309.354	180.571	297.118	237.778	351.397	249.43	288.236		53.0412
209.855	131.486	281.637	232.86	128.945	241.901	229.684	161.474		55.6339
145.979	226.584	133.123	297.458	146.341	242.45	158.553	158.615		59.3714
74.2961	81.8994	76.729	70.1907	75.2977	97.95	74.3256	71.8711		8.84498
212.968	132.869	186.903	156.558	164.425	216.976	181.639	164.611		28.5064
94.3607	94.2058	104.184	106.428	107.845	104.141	103.263	113.406		6.50723
203.712	215.59	254.951	207.383	214.675	197.497	215.705	210.037		17.3758
191.227	264.51	290.767	258.075	271.122	223.947	262.872	221.219		32.6844
248.204	202.032	135.721	150.388	112.269	159.828	173.186	140.158		42.8554
87.5279	78.1522	101.291	79.196	78.7593	99.8801	102.109	88.4317		10.4269
115.647	118.795	90.6572	78.3574	180.489	165.323	164.711	96.156		38.8807
153.349	192.729	163.945	153.904	182.693	124.994	158.722	134.785		22.4191
197.8	276.226	156.194	198.752	172.949	160.234	158.951	160.161		40.6357
135.412	141.062	156.621	94.7909	161.559	144.321	90.3099	126.961		26.3775
309.852	361.193	358.2	523.903	358.6	334.318	374.853	349.588		64.7524
185.048	295.37	232.385	182.011	238.308	186.765	241.338	219.676		38.4326
246.122	231.103	170.816	114.941	125.804	94.7758	155.363	209.497		55.9717
271.167	277.376	392.576	223.08	411.262	583.219	434.601	677.362		157.747
272.413	243.992	289.132	198.73	290.767	236.108	236.261	281.473		32.5884
183.637	202.508	202.631	168.751	199.8	156.818	179.278	204.621		18.0221
172.515	124.73	152.437	122.949	156.374	215.644	196.759	165.62		32.1414
									52.0338

## Sheet: RMSAcc
2.43392	2.35315	1.79381	2.77443	2.69847	3.3459	2.8633	2.85285		0.456031
3.19742	2.62707	3.25408	4.01403	2.66731	3.50113	3.28811	2.4675		0.516867
3.4347	3.07463	3.27786	3.62591	2.78518	3.48275	3.46717	3.45638		0.272883
1.51878	1.43822	1.40454	1.32492	1.40085	1.59021	1.30501	1.33282		0.0994846
4.52863	3.59327	4.52771	4.0366	4.01935	5.01221	4.12495	4.18219		0.428606
2.71828	2.84601	3.0888	2.35353	2.61834	2.69222	2.37738	2.64722		0.238484
2.82148	2.62713	2.96399	2.89086	2.72729	2.57802	3.205	2.63992		0.210219
4.4057	3.01775	4.21717	4.68628	3.86997	4.12465	4.03613	4.40049		0.502829
2.1001	2.80397	2.52917	2.67572	1.8455	2.03043	2.09209	2.05197		0.351007
2.5473	1.91205	2.9843	1.95758	2.30439	2.14408	2.56172	2.24584		0.355502
2.21054	2.77469	1.55423	1.78091	2.56778	2.24509	2.34861	2.18473		0.393172
4.00349	4.75294	4.1535	4.37183	4.50577	4.2665	3.92918	4.10666		0.274127
3.70623	4.53782	3.50272	4.0107	4.332	3.21274	3.75976	3.7038		0.432266
2.35708	1.8223	1.92807	1.54292	2.24449	2.12841	2.01461	1.86222		0.258401
8.27381	7.54367	8.16751	5.37894	6.74408	6.83059	6.3722	8.27423		1.04929
2.79961	3.89895	3.8016	3.85473	4.48975	2.73226	4.45441	3.63128		0.656628
1.28449	3.10802	1.49495	1.67594	1.65532	1.33557	1.71835	1.81404		0.575243
6.38725	6.3284	4.67591	6.87641	8.23933	7.70257	4.75667	7.96679		1.36614
4.23659	4.18655	5.263	4.30369	6.28013	5.71389	5.56077	5.48502		0.789581
3.375	3.75949	3.3113	4.05302	3.92249	2.42996	3.45272	4.28311		0.575735
2.791	2.58263	2.63196	2.65159	2.98098	4.34965	4.14951	2.85562		0.708682
									0.592308

## Sheet: RMSGyr
113.725	121.172	77.4683	144.006	126.583	154.775	128.562	128.489		22.906
110.89	83.3073	130.051	123.144	94.4515	124.851	108.978	95.118		16.7432
97.8348	101.553	82.1802	115.051	89.6175	123.657	90.7312	92.299		13.9262
45.7777	54.5638	47.0418	46.9748	51.2845	57.1336	42.9233	49.0799		4.73008
108.025	78.8282	108.678	91.3256	96.6237	129.646	101.363	90.6		15.3086
67.6929	58.1954	67.7298	68.0921	66.88	61.6573	68.3672	68.5904		3.8362
109.774	105.509	115.714	103.344	101.665	87.9909	119.408	102.442		9.64272
91.2147	110.912	115.047	135.79	113.702	111.605	112.435	108.352		12.094
101.481	103.664	80.0106	92.6793	62.322	72.6061	79.3545	72.7427		14.7609
58.5141	47.3287	62.2503	51.844	52.1297	57.2416	69.8123	57.0142		6.94785
58.0194	68.0966	45.3083	49.0426	73.8383	69.9994	82.7322	52.6427		13.1982
103.906	115.786	118.51	105.172	111.269	85.5435	110.874	99.4073		10.4883
120.781	133.534	101.98	115.097	119.428	107.543	104.232	105.828		10.724
93.1339	60.4825	81.161	54.3088	71.2261	75.032	50.7445	56.2388		14.8539
228.352	199.868	228.055	233.301	203.641	196.256	223.066	236.406		16.087
113.264	128.201	117.49	133.834	139.724	104.791	135.18	126.307		12.0284
90.283	107.452	49.3276	54.7034	74.6566	56.5973	72.2637	95.3573		21.1064
146.937	168.712	202.436	138.453	228.219	283.12	191.417	324.728		65.5113
149.595	129.272	159.457	131.473	156.178	147.255	148.469	174.649		14.7186
121.082	127.776	110.13	93.5787	122.134	80.4857	104.412	121.315		16.4142
79.5782	71.9312	77.0844	76.6819	89.6068	100.762	100.171	80.0789		11.0452
									20.1797

## Sheet: SE_Acc
0.205615	0.362431	0.449746	0.514628	0.458002	0.255169	0.442908	0.136074		0.137857
0.350749	0.365345	0.382011	0.294138	0.180733	0.441056	0.333708	0.358495		0.0761225
0.209505	0.194773	0.181909	0.305649	0.245782	0.378938	0.418615	0.215888		0.0892895
0.340546	0.211825	0.182868	0.206511	0.171935	0.402764	0.242954	0.241372		0.0807189
0.50292	0.301623	0.422998	0.35582	0.268706	0.391766	0.508751	0.411929		0.0860804
0.136775	0.153014	0.138992	0.242468	0.256855	0.430552	0.168587	0.247954		0.0982468
0.352085	0.329182	0.445567	0.38941	0.50847	0.344911	0.418452	0.408696		0.0594196
0.423971	0.400725	0.32062	0.470794	0.247934	0.369428	0.267126	0.379853		0.0767597
0.50598	0.371713	0.385348	0.515813	0.504378	0.456617	0.496836	0.484188		0.0564558
0.241601	0.220984	0.239338	0.214368	0.218189	0.171119	0.194587	0.28145		0.0330135
0.211824	0.344898	0.357382	0.326306	0.241162	0.398332	0.355356	0.207252		0.0740146
0.1724	0.25453	0.171717	0.192126	0.189074	0.212124	0.110726	0.12971		0.0451398
0.394496	0.252591	0.320953	0.418828	0.394566	0.397785	0.350483	0.407533		0.0564108
0.450657	0.345086	0.504014	0.276794	0.291766	0.242508	0.543215	0.433922		0.112244
0.292301	0.445645	0.259958	0.267641	0.307227	0.405465	0.363417	0.525112		0.0945369
0.330699	0.183474	0.235548	0.33693	0.374693	0.339594	0.438426	0.415562		0.085839
0.268065	0.188966	0.352118	0.344119	0.382561	0.479722	0.343613	0.50491		0.102885
0.23713	0.327687	0.376235	0.353841	0.227578	0.708651	0.271689	0.725937		0.200728
0.41211	0.242908	0.300702	0.251893	0.288031	0.234873	0.192041	0.339507		0.0690397
0.371668	0.312303	0.241967	0.266372	0.211208	0.164887	0.443843	0.176369		0.0973329
0.339043	0.249799	0.439685	0.236649	0.504862	0.264954	0.397544	0.308857		0.096947
									0.0959603

## Sheet: SE_Gyr
0.325295	0.160511	0.218605	0.233001	0.51261	0.42408	0.359909	0.21762		0.120625
0.60426	0.554895	0.345622	0.422728	0.279766	0.507115	0.382992	0.25991		0.126457
0.374391	0.368627	0.315081	0.31949	0.293293	0.274576	0.299546	0.579084		0.0977966
0.337262	0.175041	0.2948	0.200297	0.216501	0.39372	0.130889	0.230588		0.0878296
0.267662	0.386773	0.387593	0.387168	0.371713	0.443493	0.365725	0.405465		0.0502173
0.312223	0.441625	0.428039	0.380983	0.343424	0.36156	0.384899	0.315178		0.0477412
0.161427	0.183998	0.149206	0.17093	0.197663	0.125791	0.279585	0.183815		0.0455985
0.435412	0.241043	0.231825	0.355868	0.277847	0.374594	0.412229	0.247325		0.0820524
0.3156	0.385786	0.520019	0.500299	0.319856	0.389961	0.285405	0.510268		0.0952534
0.290636	0.204095	0.269533	0.233921	0.299154	0.276949	0.266339	0.294978		0.0328032
0.247316	0.484499	0.223786	0.416528	0.251839	0.340661	0.299129	0.197653		0.100128
0.257491	0.338714	0.318454	0.219659	0.245988	0.172613	0.173663	0.182761		0.0642079
0.369425	0.269799	0.290585	0.362293	0.357837	0.297424	0.287682	0.391624		0.0465635
0.175449	0.221398	0.206349	0.358106	0.165682	0.221865	0.327261	0.235793		0.0687339
0.393043	0.435024	0.562308	0.2863	0.352987	0.53835	0.50743	0.646627		0.119639
0.314988	0.277223	0.347334	0.272026	0.516589	0.360543	0.357288	0.273798		0.0806476
0.18735	0.253105	0.126732	0.366332	0.296579	0.418174	0.287438	0.250991		0.0927057
0.507371	0.287682	0.381014	0.327213	0.462624	0.324119	0.407436	0.429235		0.075328
0.16065	0.242468	0.265938	0.376746	0.237226	0.266372	0.298897	0.341963		0.0666689
0.332883	0.241162	0.197338	0.344519	0.213887	0.164068	0.342029	0.336472		0.0751919
0.207207	0.293721	0.330735	0.346237	0.252553	0.185739	0.205624	0.31339		0.0625196
									0.0841773
