# Supplementary material for: Reliability and Discriminative Validity of Wearable Sensors for the Quantification of Upper Limb Movement Disorders in Individuals with Dyskinetic Cerebral Palsy
Source: Sensors (Basel). 2023 Feb 1;23(3):1574. doi: 10.3390/s23031574 (PMC9921560; doi:10.3390/s23031574)
Supplement: Supplementary file 1 [file sensors-23-01574-s001.zip › sensor_parameters_short_wrist_RGV.xls]

## Sheet: MaxJerk
78.9177	43.7748	17.8208	57.9209	65.2266	62.4036	59.1221	32.6463		19.6525
29.0311	45.1482	34.3984	44.6801	34.9131	30.3185	55.4581	56.0455		10.7147
32.8888	59.6501	61.3969	57.9997	34.4547	64.9111	40.4135	43.7381		12.9412
25.2964	34.115	32.5856	30.7408	31.4223	21.9695	23.4715	34.7319		4.98284
55.5283	68.087	36.0381	38.5747	39.8274	46.4575	50.9364	20.7508		14.2217
29.5615	53.992	35.9168	31.2891	48.7455	19.1216	28.7176	39.3744		11.3321
41.4631	35.5559	26.5347	37.5407	44.132	26.2691	29.5141	26.3387		7.22025
53.5521	35.479	25.3921	95.83	73.9996	50.5774	32.8296	73.0155		24.2707
31.6584	100.961	44.6774	64.7926	53.9022	36.4544	43.082	41.1164		22.2692
37.216	26.9578	58.5736	33.9014	20.6425	34.9971	112.528	25.6792		30.0213
31.363	38.8082	27.9043	48.6611	46.4285	38.4875	46.2554	68.233		12.4886
37.5078	59.8548	51.7844	50.7139	40.9631	44.0043	31.4759	35.0617		9.59998
40.2991	60.2786	42.3792	26.0114	40.0208	31.8059	26.4105	33.3767		11.0919
62.8886	54.3657	27.8	70.2945	44.7955	27.3906	28.5951	24.6559		18.0885
91.9249	52.3368	102.751	67.7809	47.3702	74.8008	121.001	131.958		31.019
80.8421	41.0023	38.0858	93.7616	46.5244	58.5699	96.0862	41.5304		24.5203
21.842	14.9257	24.695	23.659	13.9412	49.3302	35.3187	30.5978		11.5871
122.282	60.8724	135.709	58.0299	45.6103	67.8964	49.8445	160.037		44.6094
80.0095	58.3708	66.1181	45.8273	31.0048	34.6314	63.6674	89.9635		20.7823
41.4567	64.4562	88.1065	38.5095	53.14	24.5855	55.7244	42.1422		19.3026
31.6357	59.2292	42.8056	62.494	87.2914	87.7526	44.638	54.2344		20.28
									20.8137

## Sheet: MaxAnfJerk
110415	130176	68552.4	14196.1	113122	40313.7	27351.7	86904.9		43252.9
145047	108051	108954	108862	122856	159206	143574	364115		85698.2
86155	122856	190791	204990	414576	347654	484841	210373		142127
9453.16	37144.6	31490.3	22992.8	29665.3	14619	23375.4	36865.7		10031.3
31575.1	180324	49996.1	104799	146272	54589.3	99005.8	51978		52560.3
36598.7	36297.8	92455	79886	71911.2	19128.7	75850.7	97984.8		29157.9
35771.9	28103.4	70274.8	21605.6	45758.1	12624.5	46246.4	7979.26		20451.9
122232	78629.9	98084.3	96919.6	69006.9	123696	54583	118485		25930.2
110641	232552	112062	187788	212655	60362.6	124876	90735.4		61819.5
98671.6	34720.9	266512	65857.7	43452.4	41975.9	406255	31957.3		138181
28925	64483.1	69950.7	280519	38031.4	31973.3	178828	183418		93134.9
25071.1	141755	197360	160062	44850.8	18550.3	88867.4	211595		77207.3
41592.6	43765.4	40366.7	25859.6	44480.1	86479.3	118138	33998.2		31384.5
47946.3	40906.6	26589.2	54621.6	42368.9	171933	21205.8	12516.9		50392.1
70483.5	70895.1	179508	169028	175872	130828	317698	997972		306593
59277.5	235692	160416	47179.4	55957.9	87710	97368.3	93675.7		63779.4
54891.5	99577.4	131410	115622	18498.6	140576	223499	96430.6		60955.6
709196	170730	275901	164414	386593	96383.2	243793	105986		201866
97003	48039.5	65690.2	79002.7	29836.1	34138.7	20583.9	156997		44908.8
40464.5	48859.7	52063.9	91842.9	54816.3	24723.9	59732.9	23275.1		21765.3
29301.4	101868	73731.9	17326.1	118247	19291.5	69350.5	78868.5		37985.8
									105300

## Sheet: MeanAcc
2.39511	2.43766	2.49058	2.16249	2.48665	3.03588	1.96987	1.97865		0.344976
2.14854	3.17071	2.03021	2.56006	2.36381	2.53203	2.37161	2.1358		0.360027
2.28225	4.41332	3.10522	2.47749	2.16502	3.05424	3.00637	2.93563		0.703234
1.14438	1.25882	1.39592	1.20166	1.2114	1.38166	1.18641	1.16124		0.0964978
2.88377	3.57084	2.88188	2.66909	3.07832	2.75132	2.5036	2.86274		0.319904
1.86566	2.03185	2.02679	2.12478	2.03771	1.34589	2.01059	1.88968		0.245325
2.13615	2.18425	1.8968	2.03689	2.20865	2.02069	1.54518	1.79327		0.224912
2.20531	3.04809	2.27024	3.68815	2.52011	2.05157	2.5382	2.59104		0.528996
1.48242	2.5765	1.98372	2.35128	1.57786	1.65875	1.99398	2.25344		0.392967
1.49949	2.34481	1.93629	1.40981	1.42275	1.75604	3.08796	1.47741		0.589115
1.66314	1.74021	1.40234	1.7222	1.88051	2.35525	1.5807	1.92484		0.283552
2.61795	2.73886	3.17224	3.39697	2.45404	2.47416	2.26509	2.77007		0.380246
2.24772	2.60097	2.17697	2.53876	2.9913	2.26442	2.62683	2.24699		0.27902
1.98968	1.83547	1.64451	1.55787	1.60176	1.26819	1.20267	1.19743		0.295087
4.30957	3.63831	3.86903	3.3115	2.57871	4.25358	4.75444	4.49901		0.711458
3.10849	2.07629	2.58566	3.11465	2.43378	3.10521	3.40156	1.92826		0.542582
1.55522	1.32462	1.38156	1.14936	1.4206	1.3296	1.50099	1.8191		0.197948
4.29464	3.1013	4.06728	3.90804	3.834	2.22589	2.06683	4.02811		0.871652
4.63053	3.51006	3.76966	4.06214	3.33978	3.17728	4.37966	2.99365		0.584709
3.1224	3.86953	4.04624	3.23256	3.57375	2.97116	3.54505	3.05475		0.394916
2.00039	1.74765	2.23654	1.88659	1.96406	2.43706	2.05478	2.19162		0.217421
									0.46268

## Sheet: MaxAcc
6.84948	4.71498	4.16485	4.25652	6.26782	6.01071	4.25214	3.94017		1.13625
11.5136	5.95063	3.36435	4.32422	3.7162	7.47873	6.13761	6.72156		2.61636
5.87547	8.39542	8.04661	3.93256	4.76093	10.026	6.83365	4.20793		2.19699
2.64216	3.5241	3.61152	2.7779	2.66732	3.07144	2.60104	2.91985		0.396977
11.9321	14.5171	4.17984	4.23272	14.0183	6.08404	11.7507	4.66928		4.55061
5.60621	6.81122	6.73743	7.88991	8.68645	3.48719	6.9826	7.97521		1.62826
5.05989	4.44497	4.40939	4.31621	5.28674	4.7517	3.26315	4.34835		0.608489
5.4954	6.21914	4.71792	7.06479	5.16523	5.11461	5.6015	5.84064		0.734703
4.19297	8.56452	4.78597	7.15252	4.54796	3.83734	4.4199	4.56465		1.67268
3.61264	4.25017	7.80505	6.78581	2.79816	3.58985	9.26877	3.09104		2.45145
3.92636	4.40592	3.94624	5.30291	6.0136	4.91394	3.80193	5.00321		0.781594
6.88655	11.2763	9.0116	10.1925	8.2278	5.49646	6.78659	8.26241		1.89332
7.09496	5.89632	6.65029	7.50346	4.58589	3.83633	5.536	4.34591		1.3476
4.42737	6.5326	3.14685	5.53903	6.03565	3.90063	3.39404	2.39951		1.48089
8.97686	5.79719	9.37878	6.72184	5.3666	9.26848	10.9772	10.8197		2.18217
7.09696	3.91478	4.77144	7.83189	6.95203	7.39946	8.83835	3.81014		1.90031
2.8349	2.9954	2.98129	3.33517	3.04553	4.30824	3.31539	4.34789		0.599832
8.09703	7.5001	8.1826	8.93236	7.81109	5.34462	4.26725	10.8098		2.03225
11.1796	7.12746	8.9141	8.03165	5.96348	8.35953	8.91949	7.59868		1.53263
7.72105	7.17968	10.4114	9.13337	6.63276	5.72073	7.19279	7.13317		1.47766
4.53164	5.98703	7.79528	7.34358	6.77416	8.97766	7.04528	5.74409		1.36305
									1.91905

## Sheet: MeanGyr
108.543	89.8248	92.7025	91.5002	118.719	126.54	104.653	78.9819		16.0525
56.8973	83.8178	61.7384	87.0868	73.7803	68.7678	84.6236	78.411		11.1421
92.5908	79.4062	104.065	84.3115	69.3502	92.0812	66.1509	75.7057		12.8521
40.1609	54.8941	50.2689	44.4727	47.3871	45.7471	39.7681	48.3442		5.05567
57.7075	65.756	71.3388	73.2004	61.6285	69.1098	59.5204	74.5039		6.43004
53.7569	52.9263	52.0595	54.6669	51.5246	49.011	51.039	55.8639		2.1757
57.9404	58.0532	57.4679	52.6807	58.5787	61.3833	48.6382	55.3211		3.98046
63.0449	106.658	70.3572	104.935	79.0445	52.9163	75.912	73.5915		18.8307
55.8479	87.9091	64.7507	69.7111	59.8395	47.1346	69.1817	81.5846		13.2953
38.5135	59.5068	61.2704	33.7734	46.3392	50.8111	92.8093	42.7753		18.6254
57.7555	45.893	40.1226	72.0806	36.8327	52.0688	41.6175	59.471		11.9253
82.5111	90.0901	90.7198	125.541	78.0326	82.4681	86.9277	69.2689		16.617
69.6523	70.8571	75.3898	67.2549	85.2473	68.9167	94.32	69.2991		9.66264
64.6784	54.3626	56.0986	46.9077	43.1101	58.9854	62.6676	31.9895		11.0202
147.666	115.92	128.944	112.87	97.5804	163.103	133.38	139.793		20.9045
90.3298	82.5547	85.1322	92.1361	71.2902	102.597	101.532	85.4388		10.2555
64.1853	59.8805	79.4682	43.3603	71.0898	47.4379	75.0678	87.047		15.2612
126.636	92.5639	125.951	116.262	121.366	114.828	86.5302	117.518		15.0032
102.007	86.0777	108.327	116.535	87.6303	94.9199	120.191	74.582		15.8626
97.0317	112.688	101.284	86.6246	104.432	98.0355	97.7799	89.076		8.25349
50.7651	47.4826	52.8979	35.3723	44.7254	61.6289	49.6877	56.3623		7.86288
									13.2809

## Sheet: MaxGyr
279.208	208.727	225.551	159.523	325.874	244.353	253.967	162.121		56.5609
133.912	205.488	157.307	188.465	157.472	192.03	185.703	269.913		41.0807
240.209	167.462	375.656	142.573	174.255	169.488	182.549	140.426		77.7074
103.629	109.525	141.712	105.896	117.269	105.322	82.4756	97.1677		17.0049
119.309	159.452	124.467	112.787	109.953	148.136	109.067	122.019		18.4771
127.956	107.952	118.689	121.451	113.383	93.4101	106.781	113.941		10.5316
182.308	149.781	167.047	144.572	197.957	181.882	113.033	173.313		26.9413
181.307	288.668	141.216	339.429	182.469	161.755	228.694	149.919		71.2483
222.446	202.728	144.856	218.252	204.205	120.416	194.794	172.841		36.2874
138.1	127.211	199.561	71.7895	121.228	105.668	312.897	132.88		74.4935
109.146	127.116	127.29	183.109	96.7818	150.106	128.14	140.746		26.281
137.547	182.153	193.505	256.23	141.219	155.866	212.666	151.227		41.0055
204.406	195.852	160.995	113.25	273.324	130.004	183.898	171.576		49.2127
166.745	205.854	144.305	145.048	150.272	161.022	166.284	139.798		21.2511
389.251	237.224	291.435	281.232	229.982	434.402	297.618	272.77		71.6162
228.709	151.297	151.707	224.643	188.017	224.993	275.597	159.736		45.0987
163.847	239.557	224.106	108.871	164.857	235.93	164.995	328.223		67.4374
285.529	332.016	412.891	254.503	254.075	285.179	323.833	325.914		52.0079
324.377	196.626	250.67	320.76	149.743	212.908	248.895	204.048		60.7936
209.733	214.586	197.138	178.703	196.787	160.652	180.787	198.248		17.7206
129.56	125.786	194.32	190.877	114.617	179.695	169.425	152.665		31.0579
									49.4825

## Sheet: RMSAcc
2.65226	2.62834	2.64513	2.38956	2.76592	3.32587	2.13876	2.13936		0.383137
2.73709	3.51019	2.17159	2.8166	2.47563	2.92039	2.7006	2.63131		0.385026
2.47962	4.80322	3.45145	2.60373	2.40831	3.44354	3.27436	3.03799		0.776868
1.2819	1.48103	1.59968	1.32827	1.31038	1.53881	1.29206	1.29122		0.128496
3.46194	4.297	2.98436	2.8357	3.73013	2.98687	3.11956	3.04724		0.494896
2.0711	2.23879	2.31874	2.51618	2.43003	1.46944	2.3426	2.26663		0.325848
2.35027	2.40433	2.12663	2.24266	2.57288	2.19669	1.70659	2.05449		0.260451
2.47441	3.57965	2.5738	4.24291	2.79496	2.246	2.93201	3.04386		0.649641
1.78764	3.29533	2.27501	2.95715	1.91408	1.92365	2.24288	2.50109		0.533062
1.71333	2.55817	2.24534	1.69005	1.53923	1.94724	3.51535	1.69213		0.660597
1.86766	2.00205	1.65162	1.96866	2.20765	2.56664	1.80073	2.29976		0.296888
2.90231	3.5012	3.56198	3.91587	2.89506	2.6484	2.48413	3.16054		0.492652
2.44439	2.83213	2.43372	2.93006	3.14433	2.37244	2.83712	2.44127		0.29123
2.29927	2.17123	1.81879	1.83087	2.00584	1.44963	1.35485	1.27175		0.382815
4.81121	3.82453	4.22657	3.61827	2.86738	4.78566	5.08703	4.97906		0.785707
3.46188	2.24981	2.88818	3.55297	2.82559	3.46266	3.79726	2.16376		0.615699
1.71298	1.48322	1.52416	1.31786	1.56363	1.60556	1.65968	2.06703		0.217958
4.69146	3.8245	4.66702	4.37562	4.36532	2.46521	2.3536	4.53605		0.964878
5.79678	4.1038	4.61473	4.81982	3.55071	3.91024	5.22761	3.64962		0.796622
3.57248	4.20551	4.49064	3.62034	3.77472	3.24228	3.90658	3.60129		0.394239
2.24401	2.07576	2.85527	2.38262	2.34018	3.04042	2.57565	2.49885		0.31821
									0.543369

## Sheet: RMSGyr
127.03	105.75	106.298	99.7252	136.121	140.832	121.047	88.8925		18.388
66.4659	98.1421	74.4661	99.7633	85.7054	82.2356	98.6883	100.849		13.1218
110.096	93.7442	136.397	94.1094	80.3753	102.129	75.6678	84.7899		19.4539
48.3328	62.1649	60.7504	51.5895	54.8897	53.4	43.8308	54.3087		6.02243
65.3432	78.1133	77.4201	78.1088	67.5854	80.3726	65.4852	79.7385		6.62919
64.0778	61.746	63.1745	63.9015	59.4928	55.1152	60.1504	63.1635		3.03518
77.8534	71.5085	75.9345	67.6071	80.7278	80.9389	58.5692	74.2504		7.50806
76.6689	135.623	80.1431	135.589	93.7449	64.1307	101.016	87.1708		26.4077
78.214	103.306	74.6386	91.8943	72.5693	57.247	83.5189	90.1567		14.0834
47.6069	69.6808	74.8664	38.4233	52.7229	55.4596	109.844	53.8936		22.2515
64.1398	56.8506	48.3632	84.3298	46.7145	59.9875	51.6972	69.3308		12.4595
92.0327	100.311	105.862	143.189	89.76	91.9095	101.248	81.897		18.7387
90.5723	89.81	89.7874	73.1903	112.514	76.8645	107.635	84.5819		13.6258
82.7438	76.7424	66.2288	62.5426	63.2933	78.3986	74.9707	48.8461		11.0877
169.034	127.452	139.872	136.043	109.499	196.777	145.251	159.046		26.8983
110.958	91.4369	95.0255	110.262	88.6398	120.298	121.846	93.4332		13.404
76.926	82.4566	101.648	51.1218	84.7883	70.9943	84.8481	117.687		19.8202
138.799	118.376	160.687	133.224	138.233	129.44	110.023	137.174		15.1139
138.713	102.175	132.209	144.877	95.4768	112.932	138.594	94.0457		21.0658
111.381	128.14	109.526	100.76	117.968	108.19	107.025	105.749		8.45749
62.5875	61.2235	74.5718	57.013	59.127	80.4017	68.1185	73.944		8.45873
									16.358

## Sheet: SE_Acc
0.494104	0.477111	0.269285	0.397554	0.316895	0.331012	0.365485	0.324681		0.0794259
0.199773	0.387353	0.413922	0.295845	0.486434	0.319353	0.366872	0.328116		0.0856058
0.525693	0.184167	0.324842	0.404167	0.443634	0.422775	0.463801	0.376012		0.103331
0.208576	0.322954	0.425261	0.487431	0.35728	0.378341	0.351303	0.288934		0.0843634
0.418899	0.513204	0.474574	0.386172	0.344728	0.353557	0.303411	0.428668		0.0699189
0.408428	0.288138	0.182517	0.25334	0.309524	0.369293	0.252958	0.415181		0.0823417
0.330622	0.481605	0.195745	0.347482	0.379263	0.366407	0.463255	0.352207		0.0876312
0.479282	0.330156	0.321018	0.235862	0.367119	0.344039	0.296249	0.368868		0.0698333
0.228595	0.274479	0.448488	0.270817	0.476388	0.353915	0.488005	0.498739		0.111101
0.418719	0.316307	0.530043	0.347906	0.500992	0.435131	0.490864	0.338292		0.0815089
0.458544	0.439854	0.313253	0.433764	0.298483	0.405465	0.567753	0.38842		0.0852721
0.32984	0.263123	0.513096	0.351255	0.450752	0.391595	0.374444	0.471986		0.0818907
0.24375	0.399273	0.440469	0.308884	0.525641	0.275986	0.411596	0.513135		0.105308
0.466312	0.224331	0.458047	0.243217	0.155414	0.366674	0.349192	0.202949		0.118461
0.455137	0.577765	0.439232	0.307339	0.533973	0.346501	0.31459	0.27266		0.112636
0.282016	0.366999	0.271745	0.187063	0.363319	0.416684	0.374998	0.510114		0.0988339
0.386606	0.29639	0.388549	0.456812	0.260132	0.267274	0.473002	0.340927		0.0816206
0.439742	0.186102	0.292418	0.288287	0.353197	0.379735	0.447587	0.40876		0.0893695
0.15341	0.263667	0.260713	0.260205	0.380526	0.238771	0.270752	0.187135		0.0668178
0.254289	0.309105	0.46793	0.409972	0.456758	0.327456	0.461509	0.264		0.0904135
0.255123	0.275863	0.192514	0.0982508	0.264534	0.205503	0.159323	0.196443		0.0595006
									0.0913857

## Sheet: SE_Gyr
0.379395	0.322974	0.375423	0.376838	0.323862	0.385874	0.226493	0.428287		0.0612586
0.509701	0.376309	0.424626	0.301955	0.302123	0.433917	0.543458	0.427639		0.087094
0.236134	0.306561	0.365971	0.307848	0.246378	0.490704	0.408872	0.355371		0.084575
0.201866	0.222935	0.184792	0.34082	0.224083	0.244761	0.262861	0.28132		0.0496101
0.319217	0.222589	0.335437	0.409426	0.447448	0.39444	0.444003	0.380464		0.0748648
0.316008	0.33203	0.311715	0.418516	0.449738	0.253904	0.237616	0.477628		0.0892337
0.14106	0.249304	0.141779	0.197064	0.114489	0.13601	0.331662	0.107504		0.0779189
0.451559	0.254727	0.298493	0.289312	0.381601	0.375367	0.154083	0.356675		0.091578
0.109808	0.325341	0.378669	0.193007	0.317114	0.384529	0.331463	0.329453		0.0953412
0.313595	0.230856	0.387817	0.454694	0.176914	0.385488	0.483142	0.146666		0.126551
0.324369	0.21223	0.447022	0.494646	0.174752	0.310286	0.359072	0.359043		0.107351
0.331101	0.419195	0.287682	0.246743	0.218254	0.274879	0.295117	0.243947		0.0629958
0.243663	0.220081	0.237204	0.235265	0.138199	0.278326	0.316775	0.203022		0.0524445
0.149076	0.129519	0.24166	0.19103	0.0724257	0.144594	0.168953	0.0370126		0.0645175
0.175732	0.386009	0.392085	0.255819	0.438815	0.172117	0.465547	0.202722		0.122345
0.301813	0.380147	0.281268	0.247799	0.209032	0.403405	0.319828	0.412993		0.0742371
0.216468	0.197352	0.266889	0.41847	0.140732	0.115492	0.537234	0.0757749		0.158262
0.54686	0.2819	0.278396	0.406565	0.380431	0.409572	0.235946	0.359426		0.0986065
0.0879873	0.27029	0.149364	0.194941	0.319193	0.287217	0.206318	0.277604		0.0786503
0.210207	0.253534	0.350272	0.307291	0.352964	0.250099	0.38931	0.17243		0.0762763
0.203014	0.118504	0.178006	0.0425308	0.178506	0.163599	0.18214	0.152374		0.0508906
									0.0911952
