# Supplementary material for: Reliability and Discriminative Validity of Wearable Sensors for the Quantification of Upper Limb Movement Disorders in Individuals with Dyskinetic Cerebral Palsy
Source: Sensors (Basel). 2023 Feb 1;23(3):1574. doi: 10.3390/s23031574 (PMC9921560; doi:10.3390/s23031574)
Supplement: Supplementary file 1 [file sensors-23-01574-s001.zip › sensor_parameters_short_wrist_RS.xls]

## Sheet: MaxJerk
22.7551	36.888	27.2118	112.759	22.7363	32.2667	36.7108	27.3288		29.9843
66.5359	29.7308	36.628	80.368	51.2441	52.0812	51.1783	42.9659		16.1584
64.33	52.1586	93.4698	77.3202	92.7958	103.395	74.3717	67.2629		17.265
62.2094	33.5097	53.0517	39.087	57.5399	38.2918	38.2893	55.6273		11.0159
40.1114	52.2958	56.2578	52.3362	48.2731	44.5603	45.4574	67.7444		8.53191
16.1194	45.8156	25.8057	31.5295	24.8578	69.2425	40.6614	53.666		17.4439
73.6298	84.8385	84.4734	90.4514	47.6734	95.5113	67.2435	143.526		27.7665
45.8657	65.6243	40.8475	96.6685	61.9103	78.448	46.9081	36.7397		20.6782
56.5216	79.8184	73.8904	65.1746	64.7765	91.7607	61.0391	84.4		12.3473
81.8668	37.5122	76.1144	20.4545	57.6798	65.6778	45.7622	51.6882		20.2944
33.2923	38.8204	33.9414	51.4682	30.9406	26.6109	42.8386	33.9408		7.76158
82.4349	69.0387	40.8113	80.3105	76.1593	30.1541	47.893	63.6314		19.5075
98.6962	106.736	95.2635	89.7523	64.851	27.0123	104.622	111.237		28.2556
26.2812	22.0856	20.6165	14.5528	16.9665	8.75998				6.16732
197.247	186.525	128.141	133.773	103.857	147.718	119.507	112.353		34.1449
89.6932	71.1239	49.4241	58.2312	90.2503	71.6362	67.1827	80.1282		14.3188
67.0192	23.1351	40.6908	67.8023	32.3615	49.0927	66.0488	53.5001		16.8891
257.113	117.743	295.279	44.4772	115.543	171.318	64.6881	63.6201		92.9823
138.12	78.3967	90.6253	94.5653	78.828	47.3616	52.3258	83.5347		27.9796
71.6863	88.1979	89.6493	92.7468	39.6563	54.9529	50.8467	91.9331		21.3281
26.0984	38.6227	40.0958	53.8839	40.1211	60.088	35.0041	40.0226		10.6378
22.7551	36.888	27.2118	112.759	22.7363	32.2667	36.7108	27.3288
									28.8527

## Sheet: MaxAnfJerk
84010.8	68120.8	35448.8	321057	26418.6	34024	38866.6	39914		98941.7
175359	58106.2	380687	81548.8	94577.6	244649	83124.9	103890		110556
173906	50269.7	312290	117466	377013	369480	154217	151556		122830
83327.2	22975	34158.1	51418	31074.4	28167.3	44776.8	10940.3		22028.9
161749	122233	188146	112768	132146	108558	115515	87833.7		32033.6
49332	76149.5	41756.6	49235	94010.4	35463.1	112582	34888.1		29167.2
41415.1	64611.9	39011.8	66530.9	41602.2	114003	65482.5	187205		50526.7
132640	28597.8	47621.2	63832.2	19559.6	70744.3	27972.1	53839.4		36036.4
89228.5	145408	407267	204116	144882	103754	327197	60676.7		122120
34401.5	20426.5	22672	42641.6	13207.8	39034.2	44629.6	14017.9		12803.6
152987	20931.8	148698	78288.6	68212.3	29852.2	106705	79261.9		48775.7
239127	192403	254823	68715.9	130310	131383	56809.9	67520.7		78489.8
113040	46231.5	324455	119118	50476.9	117901	125819	141904		86077.6
28836.9	30529.1	12850.4	83566.1	15673.2	10613.6				27369.5
266380	197645	941104	275095	518824	522318	138240	226923		265422
543506	35622	48347.1	270055	91172.7	88658.2	33575.2	277160		179364
382088	72276.8	44300	48149.7	75546.6	59546.6	105098	126338		111791
521472	155638	589735	402227	293215	144132	303196	192468		166946
17560.1	203820	48033	41729.5	35098.5	35869.7	85810.6	45101.5		59661.5
260351	131144	154043	192515	59568.9	120361	103145	626521		180330
21500.2	26726.5	35091.3	37465.9	50727	70655.5	35610.8	22593.4		16378.8
84010.8	68120.8	35448.8	321057	26418.6	34024	38866.6	39914
									112788

## Sheet: MeanAcc
1.92282	2.14069	2.71467	2.95862	1.76214	2.00952	2.29097	1.72468		0.444366
2.9146	2.68574	2.45552	3.10819	2.77814	2.72335	2.36477	2.69087		0.236017
3.38998	3.39467	3.16975	3.27279	3.80368	4.0796	3.4197	3.20071		0.316006
3.15989	2.17536	1.90509	1.82837	2.25657	1.63449	2.09296	2.36783		0.463784
4.04292	3.51215	3.54274	3.22703	4.67508	3.13677	3.47253	3.65574		0.494107
2.41407	2.97962	2.46398	2.59412	4.40604	4.21964	3.17113	2.73439		0.778211
5.16494	6.22354	4.94939	5.619	4.59136	5.44355	4.66116	4.86104		0.550495
2.50802	2.87826	1.87381	2.60699	1.87813	2.4118	1.77758	1.84916		0.426399
2.93619	3.65264	3.35889	3.31191	2.51528	2.95111	2.89495	3.37656		0.362904
2.26191	2.41896	2.64894	2.22785	2.8298	1.75145	2.47443	1.46217		0.454089
1.34449	1.20263	1.64482	1.43567	1.40292	1.34267	1.57486	1.4321		0.138404
3.42866	3.56321	2.75297	2.97	3.02098	2.69859	3.23971	2.99282		0.306146
3.78642	3.94252	3.85357	4.59896	4.7417	2.27941	4.46182	4.47969		0.791061
0.863493	0.798743	0.759151	1.10907	1.14083	0.991639				0.161251
6.30062	6.23407	8.07821	5.35541	7.53043	7.26812	5.95726	7.51878		0.946179
2.97861	3.2881	2.86986	4.004	2.98233	3.18116	3.29712	3.79575		0.404419
2.37982	1.59768	1.83446	2.75289	1.98773	1.82711	1.74002	2.57864		0.426259
8.46045	7.46038	9.04322	4.899	4.20466	4.54095	3.14497	3.97238		2.25604
3.4215	3.78203	4.82196	4.4113	3.99244	3.07573	4.12483	3.14245		0.614564
4.22923	3.94337	4.03259	4.12558	3.87223	3.84036	3.36027	4.48363		0.328624
2.14034	2.97816	2.42923	3.28763	2.85551	3.17006	2.63704	2.35877		0.408221
1.92282	2.14069	2.71467	2.95862	1.76214	2.00952	2.29097	1.72468
									0.706677

## Sheet: MaxAcc
3.33502	4.1404	5.18297	9.08476	2.87393	3.66121	4.13388	2.69122		2.05725
7.73275	5.03683	9.42674	8.42854	5.13212	6.39389	6.49428	8.57518		1.63567
10.223	5.50985	9.84551	11.716	12.1811	9.4132	8.9748	7.70296		2.14314
6.5757	4.38316	4.90571	4.30486	6.11527	3.97842	5.02536	5.11803		0.897362
12.0724	8.41656	10.1255	8.92785	9.9184	5.02772	6.58818	9.31437		2.18
8.22501	10.1302	5.79308	6.27295	15.1668	8.98388	12.2285	5.14701		3.44129
9.61871	9.63174	9.37726	10.3021	7.97181	9.16432	8.59813	12.0872		1.22907
8.943	9.10643	4.88054	10.766	8.84632	12.2737	7.22879	4.79884		2.62699
6.32257	8.40571	6.01363	6.7794	5.69876	5.91665	7.69668	7.16831		0.951536
7.91121	5.09236	6.25772	4.51921	4.41747	5.18828	4.69802	3.90569		1.2798
4.41051	3.12218	4.10647	5.22838	4.44755	4.16601	3.83768	3.65217		0.622976
12.9128	13.3534	12.8454	9.75812	8.56015	6.83579	11.2013	9.17814		2.37221
11.583	12.0901	17.2846	15.1079	10.9733	10.2235	14.3671	13.1569		2.36854
2.85162	1.98876	2.44961	2.77195	2.18319	1.67081				0.459032
13.1619	11.9114	14.0016	11.6471	11.6302	14.1174	10.5069	15.1517		1.58462
8.70718	6.59557	5.83712	7.10355	6.20574	7.91375	8.09542	9.08287		1.18789
4.63062	4.13384	4.48431	6.32346	3.81575	5.87772	3.90522	6.46887		1.09655
17.0768	21.9983	18.7813	8.14336	8.57915	13.0112	7.97443	21.8944		6.04586
11.4164	9.21311	9.84785	9.36066	8.30946	6.69433	7.68981	7.75458		1.48452
15.8446	14.8899	14.3606	13.8577	13.1852	10.9962	13.1054	16.0509		1.64869
4.86806	7.2249	6.25926	6.38794	5.70765	10.2495	5.79365	6.88093		1.61927
3.33502	4.1404	5.18297	9.08476	2.87393	3.66121	4.13388	2.69122
									2.24625

## Sheet: MeanGyr
81.6251	99.1542	114.766	106.725	70.6298	110.405	109.834	77.9455		17.1175
146.147	112.953	121.394	133.557	117.823	122.077	116.833	125.672		10.7185
138.438	139.652	132.364	126.922	107.937	137.374	113.083	119.69		12.1758
131.639	99.1982	75.3692	86.8474	91.3224	67.4008	77.6111	99.1762		19.9406
119.789	122.584	118.395	111.709	138.335	101.79	127.657	127.337		11.0264
90.1317	114.228	104.979	97.6245	142.39	151.167	119.623	111.404		21.0348
137.975	140.026	120.433	141.602	132.603	155.352	127.941	121.955		11.522
100.066	74.214	78.5875	71.5712	53.5588	47.9764	51.5284	83.5361		18.0379
124.542	112.913	130.958	130.527	115.987	110.1	122.806	105.935		9.3862
95.5448	100.003	93.7238	81.1171	108.113	75.4071	97.9722	54.5968		17.1493
59.8488	57.3519	58.4071	75.9884	59.3276	60.7485	50.6061	63.2879		7.18525
143.868	154.122	144.076	155.203	142.469	144.337	142.843	141.074		5.45592
141.14	154.533	149.84	157.129	159.263	93.2274	157.196	153.452		21.9614
41.9238	48.7689	53.755	40.7646	60.0082	43.5083				7.5798
209.23	188.641	350.067	200.713	311.894	275.225	238.422	310.823		60.0797
118.723	155.503	118.544	168.387	102.842	116.987	134.545	139.401		21.9427
111.975	110.027	89.4572	124.822	124.553	77.8773	65.0263	132.685		24.4632
275.471	205.37	289.197	190.379	197.14	135.3	131.315	186.385		57.1425
132.556	152.769	152.674	140.023	109.295	119.491	185.274	119.143		24.5464
186.083	161.472	167.579	171.489	179.662	169.028	141.333	197.062		16.752
73.6032	86.7767	79.1591	96.8574	90.9087	79.1934	83.134	76.108		7.86965
81.6251	99.1542	114.766	106.725	70.6298	110.405	109.834	77.9455
									24.3712

## Sheet: MaxGyr
180.666	225.048	227.514	230.906	184.14	210.851	211.128	163.728		25.0082
293.007	209.865	191.774	262.657	208.591	298.164	192.715	197.523		45.3985
222.528	190.049	192.824	221.772	162.901	275.145	174.426	185.366		35.7476
208.237	176.669	168.822	156.723	162.937	145.621	180.946	164.928		18.7884
216.472	219.132	213.589	193.637	248.635	187.124	227.297	218.734		19.0805
139.854	167.157	150.727	157.134	209.306	217.93	173.321	158.536		27.811
272.093	262.633	257.441	304.927	234.207	258.41	230.394	288.661		25.1862
359.651	251.424	187.598	216.916	201.435	237.457	211.666	187.145		56.3908
306.2	243.557	266.077	268.875	262.113	289.48	285.748	299.928		21.1511
150.996	175.004	162.426	179.08	216.533	236.85	253.21	131.978		42.866
160.868	139.233	182.452	210.891	130.209	141.997	117.993	194.432		33.1389
209.904	226.898	246.249	249.989	229.72	233.962	278.121	217.242		21.4881
213.883	228.904	204.686	231.528	286.297	211.822	298.976	247.886		35.0507
110.994	90.2645	157.259	126.187	170.317	86.5502				34.5398
325.984	407.355	485.609	323.166	538.15	492.776	396.278	665.29		115.412
239.882	283.755	245.428	298.321	189.215	265.881	274.673	242.967		33.8097
287.611	223.43	204.647	322.405	269.266	185.927	172.832	304.334		56.939
437.4	356.851	631.757	407.498	313.345	398.171	327.951	296.055		107.182
241.147	263.416	320.25	277.538	279.452	251.47	313.448	244.352		30.0364
284.906	276.613	268.25	262.113	250.075	235.048	240.423	259.706		17.2057
164.991	250.689	190.451	232.181	223.548	233.944	182.984	202.35		29.5215
180.666	225.048	227.514	230.906	184.14	210.851	211.128	163.728
									48.3727

## Sheet: RMSAcc
2.04367	2.3046	2.96301	3.46869	1.89947	2.13581	2.46955	1.81178		0.568832
3.26843	2.8482	2.91702	3.51146	3.04374	3.04563	2.55349	2.97903		0.283825
3.87374	3.55979	3.46666	3.80807	4.25865	4.37456	3.85154	3.44743		0.345282
3.35854	2.40617	2.09955	2.01424	2.5299	1.73338	2.32204	2.52246		0.483223
4.4184	3.77286	3.81619	3.49532	4.87829	3.28228	3.63191	3.89856		0.516331
2.69606	3.37003	2.60638	2.69572	5.09988	4.38735	3.7495	2.86852		0.916672
5.66791	6.60057	5.534	6.20355	4.92893	5.82498	5.04994	5.55994		0.552774
3.53541	3.84509	2.1817	3.67139	2.80152	3.67789	2.39901	2.12629		0.730715
3.28962	4.06311	3.65965	3.52733	2.70482	3.20862	3.31057	3.87815		0.425551
2.6608	2.6754	2.88126	2.4168	2.96145	2.10675	2.68521	1.65655		0.434569
1.58708	1.42635	1.81468	1.7452	1.66483	1.59424	1.76001	1.64981		0.12269
4.16655	4.27937	3.55642	3.63124	3.52222	3.00299	3.72521	3.44213		0.406005
4.24137	4.53306	4.94577	5.2585	5.0489	2.70388	5.06397	4.97985		0.83174
0.9947	0.906899	0.929867	1.23695	1.22927	1.01862				0.145601
6.81061	6.64351	8.47014	5.79491	7.90771	7.84999	6.26496	8.11081		0.976003
3.41618	3.58985	3.1006	4.26559	3.25976	3.60359	3.63986	4.25756		0.424632
2.57597	1.7692	2.06615	3.05147	2.16027	2.1293	1.89377	2.9095		0.471995
9.28368	8.64818	10.2377	5.22218	4.62237	5.24099	3.79098	6.03106		2.40508
4.04524	4.14278	5.36807	4.84395	4.59787	3.39866	4.43047	3.68786		0.634428
5.24358	4.84648	5.1119	5.12484	4.75358	4.49842	4.08058	5.8417		0.527255
2.48304	3.61373	2.85957	3.75247	3.17899	3.87433	2.94622	2.82007		0.502792
2.04367	2.3046	2.96301	3.46869	1.89947	2.13581	2.46955	1.81178
									0.775869

## Sheet: RMSGyr
93.1701	118.172	130.223	119.123	84.357	123.207	126.257	92.1888		17.9289
162.42	127.581	129.844	144.117	131.128	144.9	127.23	135.974		12.0929
148.564	146.053	138.674	139.754	114.837	147.91	123.047	129.041		12.4561
142.211	112.568	94.2134	97.4736	102.33	74.5553	97.2046	111.098		19.4135
133.462	135.968	131.312	123.227	154.812	116.025	140.809	140.092		11.744
98.2037	119.167	112.583	106.225	150.59	160.876	127.028	117.186		21.5724
162.16	160.068	147.806	168.939	150.535	176.215	144.757	146.109		11.6043
129.678	97.2486	93.8975	89.9005	71.2876	70.3983	67.7079	98.1031		20.4894
149.401	127.376	151.016	143.515	130.115	132.515	138.881	130.193		9.2315
99.2344	108.068	104.304	96.2976	123.404	92.9486	117.958	62.7572		18.5233
70.059	63.2584	69.1617	88.4693	69.4664	68.2889	57.1491	75.1612		9.11935
153.189	165.981	156.125	168.614	156.497	157.165	160.03	150.901		6.07061
149.586	161.462	155.345	166.838	173.463	114.404	173.255	163.925		19.1661
51.8286	54.8766	65.4361	51.4181	80.0085	50.244				11.7078
224.021	216.281	365.533	215.103	344.139	295.587	255.766	355.574		64.6405
145.818	176.083	142.022	185.171	118.14	140.487	156.208	160.633		21.3146
127.949	123.022	106.219	148.918	141.444	90.8194	76.6509	157.746		28.5191
292.957	219.303	329.269	214.382	211.905	163.097	156.986	195.27		59.8965
141.238	161.904	172.623	154.519	134.685	135.015	200.511	133.113		23.6196
197.413	173.882	178.563	183.808	185.211	177.103	161.919	202.67		12.9876
87.7919	110.836	99.0109	119.431	111.936	102.214	100.036	95.4503		10.1695
93.1701	118.172	130.223	119.123	84.357	123.207	126.257	92.1888
									25.5674

## Sheet: SE_Acc
0.33297	0.380107	0.344359	0.36347	0.383972	0.414049	0.378134	0.453156		0.0383082
0.298254	0.428892	0.192117	0.41736	0.268765	0.385336	0.34738	0.378032		0.0811764
0.318454	0.426667	0.254613	0.353826	0.279637	0.267994	0.412338	0.282888		0.0664095
0.369329	0.254642	0.380896	0.403559	0.232193	0.432168	0.226313	0.355859		0.0816115
0.203425	0.355968	0.321227	0.38897	0.351255	0.277976	0.401505	0.440514		0.0750841
0.136368	0.107829	0.344295	0.104375	0.0564786	0.271776	0.143475	0.149009		0.0954704
0.386417	0.452296	0.426804	0.521952	0.338501	0.436356	0.277568	0.346021		0.0769904
0.130701	0.161022	0.352085	0.131567	0.0935114	0.097429	0.109824	0.232945		0.0883445
0.468835	0.465956	0.391672	0.481451	0.508858	0.404807	0.332418	0.452822		0.0576387
0.259644	0.347454	0.248484	0.27029	0.446727	0.198456	0.364385	0.343596		0.0797513
0.292388	0.256656	0.389717	0.301848	0.29354	0.0872996	0.392515	0.295957		0.0947429
0.230044	0.205493	0.266291	0.292176	0.378001	0.42163	0.274644	0.162158		0.0861479
0.4273	0.356924	0.210087	0.24937	0.218031	0.178941	0.38766	0.364711		0.0951189
0.472959	0.316601	0.366644	0.438571	0.222451	0.347219				0.089376
0.441232	0.467901	0.396163	0.366431	0.41198	0.569768	0.474623	0.471085		0.062244
0.305156	0.337912	0.225976	0.428846	0.500047	0.464347	0.40095	0.378608		0.0890011
0.544452	0.521963	0.408715	0.381711	0.489479	0.423038	0.490085	0.226994		0.101756
0.322773	0.493498	0.333773	0.401656	0.385303	0.400888	0.358354	0.18776		0.0875134
0.220001	0.131422	0.267175	0.331395	0.212127	0.328768	0.318123	0.20228		0.0721323
0.327147	0.276066	0.211049	0.220543	0.231329	0.145585	0.397476	0.242237		0.0772249
0.275883	0.22739	0.186146	0.252753	0.353078	0.243156	0.393366	0.335222		0.0705529
0.33297	0.380107	0.344359	0.36347	0.383972	0.414049	0.378134	0.453156
									0.0826683

## Sheet: SE_Gyr
0.32885	0.251668	0.306561	0.327308	0.219715	0.303476	0.163665	0.163991		0.0691703
0.510212	0.221665	0.463573	0.37594	0.139976	0.394798	0.354135	0.295495		0.122223
0.454822	0.401684	0.26127	0.456267	0.230297	0.275131	0.169899	0.405465		0.110607
0.221135	0.164382	0.113082	0.204529	0.23043	0.298147	0.114722	0.192991		0.0617738
0.20282	0.18455	0.185378	0.228356	0.192206	0.191466	0.242285	0.297107		0.0390763
0.179161	0.22436	0.147003	0.215046	0.248896	0.244914	0.155638	0.162859		0.0409828
0.217391	0.295521	0.195094	0.197218	0.191891	0.124499	0.224116	0.244886		0.0489817
0.148274	0.118921	0.220023	0.186548	0.140322	0.137952	0.147765	0.193895		0.0343947
0.31178	0.292771	0.266452	0.312497	0.327599	0.289217	0.384441	0.199695		0.0527959
0.265108	0.322336	0.213371	0.20452	0.211553	0.13815	0.202408	0.243499		0.0537372
0.306917	0.232959	0.282199	0.292735	0.228295	0.16863	0.455738	0.1648		0.0932624
0.174426	0.153854	0.278787	0.307182	0.202941	0.306835	0.294638	0.214057		0.0623554
0.259014	0.375789	0.297124	0.214736	0.367365	0.100414	0.327829	0.324454		0.0912037
0.184413	0.201557	0.0989171	0.266072	0.0650369	0.186749				0.0731224
0.295117	0.372773	0.466834	0.323854	0.411855	0.436427	0.445031	0.313884		0.0661879
0.10703	0.173569	0.132503	0.188401	0.211274	0.224998	0.189074	0.204872		0.040334
0.456883	0.30135	0.250057	0.339844	0.273538	0.276521	0.409514	0.289749		0.0728719
0.616986	0.374693	0.564705	0.408286	0.492476	0.384685	0.35747	0.437468		0.0949231
0.275497	0.268806	0.202176	0.169091	0.176537	0.145831	0.325777	0.280919		0.0652096
0.260283	0.307383	0.320472	0.260219	0.391726	0.343772	0.185885	0.17218		0.0757814
0.179531	0.144117	0.17215	0.129052	0.179004	0.181542	0.164704	0.149209		0.0194801
0.32885	0.251668	0.306561	0.327308	0.219715	0.303476	0.163665	0.163991
									0.0725227
