# Supplementary material for: Reliability and Discriminative Validity of Wearable Sensors for the Quantification of Upper Limb Movement Disorders in Individuals with Dyskinetic Cerebral Palsy
Source: Sensors (Basel). 2023 Feb 1;23(3):1574. doi: 10.3390/s23031574 (PMC9921560; doi:10.3390/s23031574)
Supplement: Supplementary file 1 [file sensors-23-01574-s001.zip › sensor_parameters_TRT_long_hand.xls]

## Sheet: HA_RF_DCP
MaxJerk				MaxAnfJerk				MeanAcc				MaxAcc				MeanGyr				MaxGyr				SE_Acc				SE_Gyr				RMS_Acc				RMS_Gyr				CORR_AYZ				CORR_GXY				CORR_GXZ
684.016	758.882	52.9378		22737.8	36986.3	10075.3		2.60274	3.39754	0.562008		25.9055	38.6644	9.02187		2.13174	2.5168	0.272277		11.6646	19.2825	5.38666		0.166392	0.234273	0.0479985		0.170405	0.246644	0.0539091		3.82486	5.18692	0.963123		2.96033	3.62002	0.466474		0.210551	0.376982	0.117684		-0.172339	-0.230692	0.0412616		-0.124838	-0.113695
517.13	676.575	112.745		21895.4	25611.3	2627.58		2.99508	3.88553	0.629647		22.6813	27.982	3.74813		2.15667	2.44736	0.205546		8.01683	8.26695	0.176868		0.361419	0.338344	0.0163167		0.44686	0.556756	0.0777081		3.92273	5.16735	0.880077		2.52681	2.76958	0.171662		-0.195892	-0.323614	0.0903128		0.546138	0.44597	0.0708297		0.0178091	0.109315
661.341	720.394	41.757		22713.9	28197.9	3877.76		3.37269	3.42902	0.0398264		25.6066	28.4049	1.97872		1.98599	1.85757	0.0908096		7.64906	7.29453	0.250693		0.289363	0.309033	0.0139088		0.488145	0.474268	0.00981273		4.4248	4.59133	0.117756		2.30691	2.15006	0.110911		0.164828	-0.090224	0.180349		0.155847	0.108523	0.0334628		-0.526913	-0.120596
660.635	385.889	194.275		27350.7	14114.5	9359.42		5.15501	3.1352	1.42822		29.0748	18.8119	7.25692		2.332	1.46476	0.613231		7.47673	4.1756	2.33425		0.348003	0.40576	0.0408399		0.523503	0.508796	0.0104		6.33332	3.75477	1.82331		2.7073	1.69334	0.716982		-0.708261	-0.57574	0.0937071		-0.27655	-0.56469	0.203745		-0.472872	-0.606516
679.829	804.647	88.2596		20976.2	21145.3	119.6		3.44563	4.18095	0.519952		28.9595	34.2814	3.7631		1.57938	1.87888	0.211781		5.076	7.11756	1.4436		0.268601	0.262837	0.00407536		0.465946	0.419859	0.0325885		4.78406	5.76083	0.690683		1.86064	2.22741	0.259344		0.539267	-0.438572	0.691437		0.318558	0.134765	0.129961		-0.509211	-0.16386
487.268	603.307	82.052		20192.5	37645	12340.8		3.1413	4.31223	0.82797		22.9306	30.5671	5.39976		1.87811	1.98731	0.0772121		9.66286	8.40048	0.892637		0.29316	0.318416	0.0178587		0.323578	0.428677	0.074316		4.14955	5.62714	1.04481		2.38723	2.42613	0.0275123		0.261792	0.182497	0.0560697		-0.523353	-0.577663	0.0384029		-0.349979	-0.239789
617.521	617.535	0.00974849		20758.9	22894.4	1510.05		3.54878	5.48314	1.3678		29.0727	27.32	1.23929		1.81894	2.77594	0.676703		8.0679	10.6809	1.84769		0.256716	0.382866	0.089202		0.31752	0.43495	0.083036		4.86322	6.55916	1.19921		2.30482	3.25944	0.675015		0.372479	0.322437	0.0353847		0.554932	0.456741	0.0694318		-0.340327	-0.142339
737.96	828.75	64.1977		12318.5	16060.2	2645.76		2.4775	4.25584	1.25748		26.5083	31.4592	3.50081		1.25778	1.74362	0.343537		4.51781	6.70945	1.54973		0.261153	0.279253	0.0127987		0.381342	0.459936	0.0555744		3.5669	5.61309	1.44688		1.49664	2.00315	0.358156		-0.276864	-0.321367	0.0314681		0.049138	-0.0661427	0.0815158		-0.278814	-0.0455767
284.529	304.099	13.8377		15028.6	15223.4	137.733		2.22541	2.439	0.151029		12.6273	12.478	0.105542		1.10134	1.3236	0.157158		5.26091	6.45923	0.84734		0.536206	0.524583	0.00821877		0.52052	0.540062	0.0138185		2.71931	2.90306	0.129931		1.30741	1.52879	0.156544		0.236485	0.351774	0.0815213		-0.101281	0.114846	0.152825		-0.169727	0.025062
412.417	452.938	28.6525		18457.3	23714.4	3717.39		2.51021	3.4912	0.693662		17.2486	17.8962	0.457957		1.75371	2.22774	0.335189		8.3154	10.4287	1.49433		0.346008	0.493878	0.10456		0.292708	0.389562	0.0684867		3.33563	4.32468	0.699367		2.25363	2.77047	0.365459		0.0457257	-0.0160781	0.0437018		-0.338124	-0.267242	0.0501208		-0.165888	-0.217989
763.693	719.977	30.9116		31367	40305.8	6320.7		3.88808	4.9068	0.720343		30.0821	29.5127	0.402645		2.00559	2.76219	0.534997		7.80706	10.611	1.98265		0.258412	0.26656	0.00576169		0.47118	0.514099	0.0303481		5.56862	6.58249	0.716911		2.38169	3.19582	0.575676		-0.553544	-0.0219087	0.375923		-0.654641	-0.437688	0.153409		-0.791409	-0.489041
255.728	213.705	29.7149		12294.5	8654.29	2574.05		1.28414	1.27064	0.00954812		12.5199	11.0684	1.02634		0.844221	0.746272	0.06926		4.78396	3.92367	0.608313		0.234817	0.222769	0.00851944		0.163183	0.187444	0.0171551		1.83644	1.86398	0.019472		1.21073	1.03942	0.121137		0.113762	0.134543	0.0146941		0.102193	0.0938559	0.00589528		-0.408512	-0.287996
1.29552	0.826385	0.331731		2.04452	2.44398	0.282458		0.113861	0.112687	0.000830087		0.143343	0.138238	0.00360968		0.00930518	0.00928663	1.31206e-05		0.01054	0.0106696	9.16373e-05		0.676916	0.662984	0.00985101		0.69457	0.691042	0.00249444		0.114088	0.112931	0.000818011		0.00931231	0.00929327	1.34648e-05		0.0945764	0.146417	0.0366567		-0.228515	-0.154909	0.0520472		-0.360144	0.0447288
523.802	787.877	186.73		24820.3	46376	15242.2		4.0991	4.82759	0.515122		21.1364	31.4192	7.27103		2.34649	2.61953	0.193071		8.46344	12.2857	2.70274		0.412531	0.380451	0.0226842		0.424369	0.382083	0.0299012		5.10974	6.16899	0.749002		2.84197	3.20809	0.258886		0.333165	-0.0427625	0.265821		0.0702874	0.075996	0.0040366		-0.325605	-0.402985
1.05976	1.03929	0.0144737		2.3722	2.41376	0.0293921		0.0407944	0.0423778	0.00111964		0.0656375	0.0689958	0.00237462		0.00954691	0.00954623	4.8085e-07		0.0110272	0.0108964	9.25223e-05		0.681879	0.684429	0.00180253		0.70856	0.692118	0.0116263		0.041394	0.0429519	0.00110162		0.00955475	0.00955422	3.76946e-07		-0.107411	0.22542	0.235347		-0.0940632	-0.131309	0.0263366		0.115238	0.124895
0.787297	0.838978	0.0365438		2.47487	2.2209	0.179588		0.0465479	0.0464261	8.6158e-05		0.0709645	0.0713424	0.000267234		0.00908004	0.00918186	7.19954e-05		0.0106505	0.0103141	0.000237859		0.686377	0.67553	0.00766961		0.695075	0.703395	0.00588376		0.0470433	0.0469788	4.56085e-05		0.00908809	0.00918948	7.16906e-05		-0.000851625	-0.300067	0.211577		0.0645757	0.134504	0.0494465		-0.219283	-0.334665
528.55	659.611	92.6745		27789.3	24243.8	2507.03		4.32925	4.88953	0.39618		21.9253	28.3963	4.57572		2.11321	2.26439	0.106901		8.26116	7.47228	0.557821		0.33506	0.363393	0.0200347		0.330974	0.386735	0.039429		5.39976	6.03696	0.450568		2.5625	2.65522	0.065564		0.0465551	-0.0141337	0.0429135		0.157202	0.245625	0.0625251		-0.130133	-0.282843
#N/A	#N/A	#N/A		#N/A	#N/A	#N/A		#N/A	#N/A	#N/A		#N/A	#N/A	#N/A		#N/A	#N/A	#N/A		#N/A	#N/A	#N/A		#N/A	#N/A	#N/A		#N/A	#N/A	#N/A		#N/A	#N/A	#N/A		#N/A	#N/A	#N/A		#N/A	#N/A	#N/A		#N/A	#N/A	#N/A		#N/A	#N/A
#N/A	#N/A	#N/A		#N/A	#N/A	#N/A		#N/A	#N/A	#N/A		#N/A	#N/A	#N/A		#N/A	#N/A	#N/A		#N/A	#N/A	#N/A		#N/A	#N/A	#N/A		#N/A	#N/A	#N/A		#N/A	#N/A	#N/A		#N/A	#N/A	#N/A		#N/A	#N/A	#N/A		#N/A	#N/A	#N/A		#N/A	#N/A
#N/A	#N/A	#N/A		#N/A	#N/A	#N/A		#N/A	#N/A	#N/A		#N/A	#N/A	#N/A		#N/A	#N/A	#N/A		#N/A	#N/A	#N/A		#N/A	#N/A	#N/A		#N/A	#N/A	#N/A		#N/A	#N/A	#N/A		#N/A	#N/A	#N/A		#N/A	#N/A	#N/A		#N/A	#N/A	#N/A		#N/A	#N/A
#N/A	#N/A	#N/A		#N/A	#N/A	#N/A		#N/A	#N/A	#N/A		#N/A	#N/A	#N/A		#N/A	#N/A	#N/A		#N/A	#N/A	#N/A		#N/A	#N/A	#N/A		#N/A	#N/A	#N/A		#N/A	#N/A	#N/A		#N/A	#N/A	#N/A		#N/A	#N/A	#N/A		#N/A	#N/A	#N/A		#N/A	#N/A
#N/A	#N/A	#N/A		#N/A	#N/A	#N/A		#N/A	#N/A	#N/A		#N/A	#N/A	#N/A		#N/A	#N/A	#N/A		#N/A	#N/A	#N/A		#N/A	#N/A	#N/A		#N/A	#N/A	#N/A		#N/A	#N/A	#N/A		#N/A	#N/A	#N/A		#N/A	#N/A	#N/A		#N/A	#N/A	#N/A		#N/A	#N/A
#N/A	#N/A	#N/A		#N/A	#N/A	#N/A		#N/A	#N/A	#N/A		#N/A	#N/A	#N/A		#N/A	#N/A	#N/A		#N/A	#N/A	#N/A		#N/A	#N/A	#N/A		#N/A	#N/A	#N/A		#N/A	#N/A	#N/A		#N/A	#N/A	#N/A		#N/A	#N/A	#N/A		#N/A	#N/A	#N/A		#N/A	#N/A
#N/A	#N/A	#N/A		#N/A	#N/A	#N/A		#N/A	#N/A	#N/A		#N/A	#N/A	#N/A		#N/A	#N/A	#N/A		#N/A	#N/A	#N/A		#N/A	#N/A	#N/A		#N/A	#N/A	#N/A		#N/A	#N/A	#N/A		#N/A	#N/A	#N/A		#N/A	#N/A	#N/A		#N/A	#N/A	#N/A		#N/A	#N/A
		80.9367				6256.2				0.705025				3.93652				0.306094				1.8441				0.0380445				0.0438678				0.83038				0.3427				0.212669				0.0878981
[truncated: 4 more columns]

## Sheet: HA_RF_TD
MaxJerk				MaxAnfJerk				MeanAcc				MaxAcc				MeanGyr				MaxGyr				SE_Acc				SE_Gyr				RMS_Acc				RMS_Gyr				CORR_AYZ				CORR_GXY				CORR_GXZ
173.451	236.9	#N/A		7033.82	10993.4	#N/A		2.79742	3.51719	#N/A		11.264	11.6304	#N/A		1.45939	1.80167	#N/A		4.11256	4.66191	#N/A		0.441148	0.456159	#N/A		0.509737	0.539743	#N/A		3.30562	4.11163	#N/A		1.6968	2.08117	#N/A		0.159476	-0.264104	#N/A		-0.105652	-0.117453	#N/A		-0.119266	-0.120472
227.571	241.332	#N/A		6812.68	9581.38	#N/A		3.45957	3.52666	#N/A		14.748	12.7528	#N/A		1.44906	1.65586	#N/A		4.3819	4.27721	#N/A		0.38548	0.418659	#N/A		0.3618	0.431022	#N/A		4.24939	4.2119	#N/A		1.74927	1.92945	#N/A		0.638909	0.699429	#N/A		-0.0777054	0.00266387	#N/A		-0.042809	-0.114573
186.241	193.914	#N/A		10534.3	9805.45	#N/A		3.30655	3.71607	#N/A		11.1265	10.8645	#N/A		1.51009	1.70562	#N/A		4.67835	5.42145	#N/A		0.36006	0.37218	#N/A		0.408856	0.427583	#N/A		4.0974	4.50545	#N/A		1.8295	2.04381	#N/A		0.675789	0.544829	#N/A		0.363762	0.50881	#N/A		-0.235408	-0.224686
465.373	447.048	#N/A		13231	14311.7	#N/A		5.17802	5.47487	#N/A		16.9284	21.3281	#N/A		2.15725	2.18291	#N/A		6.398	8.47241	#N/A		0.474409	0.225759	#N/A		0.521443	0.271072	#N/A		6.08516	7.02609	#N/A		2.55808	2.86634	#N/A		-0.666407	-0.540056	#N/A		-0.419291	-0.356512	#N/A		-0.253956	-0.179243
274.926	292.598	#N/A		15247.4	15513.7	#N/A		2.83401	3.76384	#N/A		12.0349	12.382	#N/A		2.19725	2.91502	#N/A		7.53941	9.78146	#N/A		0.449583	0.529163	#N/A		0.346932	0.411842	#N/A		3.42533	4.43271	#N/A		2.71393	3.50933	#N/A		-0.220264	0.0617623	#N/A		-0.301901	-0.483284	#N/A		-0.274485	-0.349388
242.764	248.965	#N/A		9880.28	10222.5	#N/A		3.26998	3.85641	#N/A		12.5881	12.3778	#N/A		1.68423	2.05033	#N/A		5.80352	8.13999	#N/A		0.47952	0.481074	#N/A		0.420249	0.369867	#N/A		3.83561	4.52424	#N/A		2.02271	2.52129	#N/A		-0.669	-0.722066	#N/A		0.206049	0.0504204	#N/A		0.0182609	-0.101757
511.843	397.634	#N/A		19630.3	13947.6	#N/A		3.14429	4.01326	#N/A		19.8058	17.3239	#N/A		1.80198	2.14607	#N/A		6.34679	6.05626	#N/A		0.396687	0.469283	#N/A		0.402172	0.492462	#N/A		3.96155	4.80207	#N/A		2.19513	2.51059	#N/A		-0.516061	-0.540854	#N/A		0.0145696	-0.126002	#N/A		-0.139245	-0.22616
224.255	215.477	#N/A		11724.2	14307.5	#N/A		2.43516	1.87976	#N/A		9.67069	10.7408	#N/A		1.22577	1.00593	#N/A		3.87189	7.51164	#N/A		0.414656	0.172687	#N/A		0.42154	0.160704	#N/A		2.92277	2.61032	#N/A		1.43949	1.45645	#N/A		-0.314282	-0.111449	#N/A		-0.224228	0.023956	#N/A		-0.380337	0.0115878
205.367	215.385	#N/A		7600.2	10935.4	#N/A		1.85242	1.43832	#N/A		7.6071	11.7964	#N/A		0.9884	0.845907	#N/A		3.95965	7.88578	#N/A		0.344061	0.18333	#N/A		0.341949	0.169592	#N/A		2.30315	2.0127	#N/A		1.22798	1.2726	#N/A		-0.289816	-0.00675341	#N/A		0.0904676	0.146839	#N/A		-0.279409	-0.00750984
230.906	208.236	#N/A		9170.39	7797.22	#N/A		2.46937	2.69277	#N/A		10.5252	9.42829	#N/A		1.39322	1.50689	#N/A		4.41113	3.77802	#N/A		0.273975	0.460405	#N/A		0.300461	0.50435	#N/A		3.00453	3.01996	#N/A		1.68782	1.66026	#N/A		-0.448553	-0.456011	#N/A		0.07433	-0.030275	#N/A		-0.220567	-0.284413
275.277	495.717	#N/A		14106.5	25659.3	#N/A		3.66596	4.1706	#N/A		12.6924	20.4014	#N/A		1.85557	1.87722	#N/A		5.12576	6.58983	#N/A		0.466064	0.469643	#N/A		0.43495	0.519221	#N/A		4.25752	4.76124	#N/A		2.16586	2.11909	#N/A		-0.440535	-0.447621	#N/A		0.742827	0.542343	#N/A		0.294078	0.00765844
304.124	205.5	#N/A		8104.31	9317.87	#N/A		3.43991	3.05885	#N/A		14.4443	9.72904	#N/A		1.55026	1.49932	#N/A		4.02916	5.11486	#N/A		0.425601	0.47674	#N/A		0.465745	0.463223	#N/A		3.99167	3.51317	#N/A		1.78152	1.76106	#N/A		-0.102919	-0.205138	#N/A		0.264616	0.341272	#N/A		-0.288049	-0.27355
261.076	285.939	#N/A		16663.1	16829.2	#N/A		3.72713	4.73622	#N/A		16.7684	12.9145	#N/A		1.84655	2.67611	#N/A		6.48851	7.89281	#N/A		0.203211	0.487892	#N/A		0.22924	0.535393	#N/A		4.92342	5.39317	#N/A		2.46233	3.03683	#N/A		-0.412722	-0.381575	#N/A		-0.194549	0.0891589	#N/A		-0.194897	-0.0734603
212.848	242.239	#N/A		9088.14	11877.9	#N/A		2.52655	2.82252	#N/A		10.6542	11.6968	#N/A		1.53799	1.77748	#N/A		5.28857	5.80594	#N/A		0.350864	0.363513	#N/A		0.280675	0.328345	#N/A		3.11013	3.45006	#N/A		1.92846	2.17373	#N/A		-0.593774	-0.595978	#N/A		0.377213	0.522885	#N/A		0.304943	0.22357
194.08	182.81	#N/A		9386.85	9071.68	#N/A		3.11998	3.64698	#N/A		9.56666	10.3697	#N/A		1.35362	1.50191	#N/A		5.00477	5.26657	#N/A		0.444183	0.473431	#N/A		0.416368	0.458238	#N/A		3.61062	4.15369	#N/A		1.61751	1.781	#N/A		-0.462931	-0.212598	#N/A		0.0494622	0.0590582	#N/A		-0.451269	-0.233823
142.749	157.092	#N/A		3988.99	6751.08	#N/A		2.52233	2.7345	#N/A		7.79751	8.33556	#N/A		1.27754	1.16958	#N/A		3.98157	4.00405	#N/A		0.321714	0.389805	#N/A		0.299472	0.399519	#N/A		3.10436	3.26255	#N/A		1.58253	1.41641	#N/A		-0.491701	-0.0405162	#N/A		0.04898	-0.0513412	#N/A		-0.0316475	-0.156062
252.557	150.964	#N/A		11197	9216.51	#N/A		2.84235	2.46355	#N/A		12.0047	8.75978	#N/A		1.53941	1.54971	#N/A		4.66203	6.06153	#N/A		0.508455	0.485501	#N/A		0.465383	0.425173	#N/A		3.24523	2.88577	#N/A		1.81164	1.88302	#N/A		0.691302	0.790438	#N/A		0.278586	-0.0872608	#N/A		-0.311544	0.120209
142.261	273.853	#N/A		8736.25	20560.6	#N/A		2.87699	3.77816	#N/A		8.90613	12.2638	#N/A		1.39435	1.80515	#N/A		4.12014	5.07652	#N/A		0.39584	0.434623	#N/A		0.460404	0.535397	#N/A		3.21529	4.18858	#N/A		1.57488	1.99587	#N/A		-0.605451	-0.570434	#N/A		0.0622142	-0.101657	#N/A		-0.157328	-0.266189
244.018	237.076	#N/A		9496.46	10527.6	#N/A		2.40532	3.45688	#N/A		10.1068	10.5411	#N/A		1.09418	1.5769	#N/A		3.13765	4.52279	#N/A		0.387173	0.4299	#N/A		0.355757	0.459664	#N/A		2.82731	4.02238	#N/A		1.32504	1.84902	#N/A		-0.44614	-0.737955	#N/A		-0.449772	-0.213276	#N/A		-0.748805	-0.402412
176.17	260.931	#N/A		10617	12097.2	#N/A		4.30879	4.61469	#N/A		12.9812	14.6741	#N/A		2.08499	2.47414	#N/A		6.76315	6.93083	#N/A		0.3482	0.522865	#N/A		0.332564	0.470023	#N/A		5.04625	5.1836	#N/A		2.52171	2.91449	#N/A		-0.707769	-0.883538	#N/A		-0.475594	-0.422142	#N/A		-0.547442	-0.494812
#N/A	#N/A	#N/A		#N/A	#N/A	#N/A		#N/A	#N/A	#N/A		#N/A	#N/A	#N/A		#N/A	#N/A	#N/A		#N/A	#N/A	#N/A		#N/A	#N/A	#N/A		#N/A	#N/A	#N/A		#N/A	#N/A	#N/A		#N/A	#N/A	#N/A		#N/A	#N/A	#N/A		#N/A	#N/A	#N/A		#N/A	#N/A
#N/A	#N/A	#N/A		#N/A	#N/A	#N/A		#N/A	#N/A	#N/A		#N/A	#N/A	#N/A		#N/A	#N/A	#N/A		#N/A	#N/A	#N/A		#N/A	#N/A	#N/A		#N/A	#N/A	#N/A		#N/A	#N/A	#N/A		#N/A	#N/A	#N/A		#N/A	#N/A	#N/A		#N/A	#N/A	#N/A		#N/A	#N/A
#N/A	#N/A	#N/A		#N/A	#N/A	#N/A		#N/A	#N/A	#N/A		#N/A	#N/A	#N/A		#N/A	#N/A	#N/A		#N/A	#N/A	#N/A		#N/A	#N/A	#N/A		#N/A	#N/A	#N/A		#N/A	#N/A	#N/A		#N/A	#N/A	#N/A		#N/A	#N/A	#N/A		#N/A	#N/A	#N/A		#N/A	#N/A
#N/A	#N/A	#N/A		#N/A	#N/A	#N/A		#N/A	#N/A	#N/A		#N/A	#N/A	#N/A		#N/A	#N/A	#N/A		#N/A	#N/A	#N/A		#N/A	#N/A	#N/A		#N/A	#N/A	#N/A		#N/A	#N/A	#N/A		#N/A	#N/A	#N/A		#N/A	#N/A	#N/A		#N/A	#N/A	#N/A		#N/A	#N/A
[truncated: 4 more columns]

## Sheet: HA_RGV_DCP
MaxJerk				MaxAnfJerk				MeanAcc				MaxAcc				MeanGyr				MaxGyr				SE_Acc				SE_Gyr				RMS_Acc				RMS_Gyr				CORR_AYZ				CORR_GXY				CORR_GXZ
1303.62	512.988	559.062		62376.8	35280.8	19159.8		2.80502	2.80996	0.00349096		48.3764	19.1355	20.6764		2.3095	2.22683	0.0584592		15.0513	12.2899	1.95265		0.149282	0.337736	0.133257		0.177922	0.279569	0.0718751		4.9449	3.64083	0.922121		3.3245	2.85668	0.330803		0.124393	0.299459	0.12379		-0.0147167	-0.340772	0.230556		-0.151378	0.0666494
743.31	931.717	133.224		20929.1	30701.8	6910.38		2.35442	3.265	0.643883		27.5048	33.0535	3.92352		1.68554	2.06594	0.268979		9.81515	10.9864	0.82823		0.212817	0.267592	0.0387319		0.180834	0.330312	0.105697		3.64824	4.92604	0.90354		2.37513	2.74046	0.258325		-0.102393	-0.0835588	0.013318		0.522697	0.358272	0.116266		0.465071	0.565107
745.925	830.593	59.8698		30887.5	27208.9	2601.14		3.21113	3.2685	0.0405708		29.5275	31.0873	1.10295		1.9986	1.88916	0.0773857		9.98608	8.91583	0.75678		0.283857	0.252545	0.022141		0.337386	0.372352	0.0247252		4.60277	4.8371	0.165701		2.54731	2.32518	0.157073		0.318897	0.143395	0.124099		-0.40325	-0.457053	0.0380445		0.0907711	0.503133
917.428	764.448	108.173		18027.8	23788.3	4073.29		3.62176	3.48148	0.0991873		37.5141	32.8822	3.27522		1.49815	1.55261	0.0385137		7.0272	7.78417	0.535261		0.25517	0.273438	0.012918		0.302857	0.375998	0.0517185		5.81211	5.272	0.381913		1.92784	1.92115	0.00473066		-0.266264	-0.428313	0.114585		0.280518	0.209217	0.050417		-0.0831096	-0.0110625
351.563	674.468	228.328		9516.22	18624.7	6440.66		1.82932	3.56069	1.22427		15.8636	28.6354	9.03104		1.18856	1.80672	0.437108		5.38012	5.84719	0.330265		0.257884	0.395297	0.0971656		0.276262	0.417518	0.0998834		2.56111	4.836	1.60859		1.54072	2.12218	0.411149		-0.298467	0.263779	0.397568		-0.00302343	-0.425591	0.2988		0.375273	0.346337
406.304	628.155	156.872		21408.2	28442.7	4974.09		2.37168	3.3528	0.693755		19.6972	27.9274	5.81963		1.68754	1.91314	0.159527		7.26206	8.74098	1.04576		0.279853	0.277367	0.00175787		0.238611	0.315869	0.05463		3.25906	4.6769	1.00256		2.23306	2.41358	0.127646		0.18279	-0.0588777	0.170885		-0.02885	-0.19972	0.120824		0.0914976	-0.0721689
571.384	772.755	142.391		17135.2	36814.1	13915.1		2.66924	4.28334	1.14134		23.3945	29.1944	4.10115		1.48923	2.22015	0.516837		9.57786	13.8736	3.03757		0.210268	0.316946	0.0754331		0.1748	0.269833	0.0671983		3.82689	5.53079	1.20484		2.12824	2.87483	0.527919		0.3778	0.372369	0.00384077		0.634754	0.513854	0.0854886		-0.318198	0.0559039
909.066	946.993	26.8185		23024.9	24555.3	1082.2		2.43364	4.06751	1.15532		33.1542	37.2847	2.92069		1.40452	1.89438	0.346383		8.3114	9.60302	0.913309		0.255322	0.303688	0.0341999		0.304511	0.431072	0.0894919		3.76379	5.74479	1.40078		1.78923	2.28499	0.350557		-0.281699	0.123915	0.286812		-0.239373	-0.317529	0.055265		-0.40986	0.0632037
346.126	390.818	31.6021		19815	20789.6	689.143		2.39356	3.41856	0.724784		15.6892	16.1443	0.321765		1.66826	2.08794	0.296758		8.96717	9.81802	0.601642		0.355207	0.443309	0.0622974		0.278776	0.406195	0.0900985		3.13415	4.36289	0.868848		2.22063	2.59996	0.268231		0.0267502	0.067087	0.0285224		-0.376484	-0.408793	0.0228459		0.01886	0.00970392
506.42	778.499	192.389		33895.6	36502.1	1843.01		2.917	3.54106	0.44128		19.6627	30.5878	7.72517		2.28906	2.37123	0.0581071		9.3717	10.3749	0.709375		0.342592	0.191363	0.106936		0.381457	0.243088	0.0978414		3.93219	5.38665	1.02846		2.77958	3.02757	0.175354		-0.299555	-0.0707039	0.161822		0.18184	0.292172	0.0780163		-0.204724	-0.0351404
244.01	274.638	21.6572		10592	11001.5	289.573		1.18317	1.35243	0.11969		12.1235	10.5091	1.1416		0.928652	0.832406	0.0680564		5.9939	4.57964	1.00003		0.183738	0.275508	0.0648907		0.126406	0.247545	0.0856584		1.80432	1.92663	0.0864856		1.37777	1.10563	0.192432		0.0596412	-0.010711	0.0497466		0.406567	0.12841	0.196687		-0.0670654	0.05518
0.958302	1.01649	0.0411428		4.12202	2.65404	1.03801		0.114794	0.113042	0.00123932		0.14558	0.140399	0.00366364		0.00928206	0.00927986	1.55266e-06		0.0105219	0.0107576	0.000166659		0.680356	0.67768	0.00189181		0.700927	0.70076	0.000118149		0.115018	0.113264	0.00124027		0.00929024	0.00928822	1.43323e-06		0.162848	0.166496	0.00257992		-0.203554	-0.391982	0.133239		-0.130854	0.280101
572.812	591.752	13.3927		19370.9	26038.5	4714.72		3.42504	4.06817	0.454762		24.9761	29.216	2.99809		2.12613	2.34073	0.151747		8.24293	9.81728	1.11323		0.382997	0.433266	0.0355455		0.317192	0.406923	0.0634499		4.45525	5.1508	0.491832		2.64079	2.84637	0.145366		0.245869	0.0888088	0.111059		-0.0280069	-0.0632056	0.0248893		-0.266064	-0.349881
0.856811	0.677424	0.126846		2.40851	2.29085	0.083198		0.0411952	0.0428615	0.00117821		0.0646405	0.065106	0.000329146		0.00961564	0.00954941	4.68287e-05		0.0110293	0.0115459	0.000365255		0.686267	0.690651	0.00309976		0.700732	0.691706	0.00638277		0.0417655	0.0433694	0.0011341		0.00962368	0.0095571	4.70812e-05		-0.0246454	0.166132	0.1349		0.129061	0.0845696	0.03146		0.308934	0.128747
0.902758	0.645815	0.181686		2.84725	2.16603	0.481698		0.0458167	0.0449283	0.000628147		0.0719658	0.0655574	0.00453139		0.00908496	0.00914267	4.08112e-05		0.0107904	0.0100872	0.000497247		0.689069	0.663227	0.018273		0.689973	0.679696	0.00726725		0.0463396	0.045443	0.000633999		0.00909336	0.00915149	4.11091e-05		0.0231579	-0.0162931	0.0278961		0.109292	0.48296	0.264223		-0.142833	0.183202
647.424	790.72	101.326		20936.3	18514	1712.87		3.5407	4.25312	0.503756		30.8739	35.3189	3.14306		1.92109	2.07154	0.10638		10.8624	8.98472	1.32772		0.254413	0.304878	0.0356838		0.335323	0.387448	0.0368578		4.87303	5.63203	0.536697		2.42182	2.47585	0.0382003		-0.0486984	-0.0367555	0.00844486		0.385531	0.386766	0.000873356		-0.0118157	0.125814
#N/A	#N/A	#N/A		#N/A	#N/A	#N/A		#N/A	#N/A	#N/A		#N/A	#N/A	#N/A		#N/A	#N/A	#N/A		#N/A	#N/A	#N/A		#N/A	#N/A	#N/A		#N/A	#N/A	#N/A		#N/A	#N/A	#N/A		#N/A	#N/A	#N/A		#N/A	#N/A	#N/A		#N/A	#N/A	#N/A		#N/A	#N/A
#N/A	#N/A	#N/A		#N/A	#N/A	#N/A		#N/A	#N/A	#N/A		#N/A	#N/A	#N/A		#N/A	#N/A	#N/A		#N/A	#N/A	#N/A		#N/A	#N/A	#N/A		#N/A	#N/A	#N/A		#N/A	#N/A	#N/A		#N/A	#N/A	#N/A		#N/A	#N/A	#N/A		#N/A	#N/A	#N/A		#N/A	#N/A
#N/A	#N/A	#N/A		#N/A	#N/A	#N/A		#N/A	#N/A	#N/A		#N/A	#N/A	#N/A		#N/A	#N/A	#N/A		#N/A	#N/A	#N/A		#N/A	#N/A	#N/A		#N/A	#N/A	#N/A		#N/A	#N/A	#N/A		#N/A	#N/A	#N/A		#N/A	#N/A	#N/A		#N/A	#N/A	#N/A		#N/A	#N/A
#N/A	#N/A	#N/A		#N/A	#N/A	#N/A		#N/A	#N/A	#N/A		#N/A	#N/A	#N/A		#N/A	#N/A	#N/A		#N/A	#N/A	#N/A		#N/A	#N/A	#N/A		#N/A	#N/A	#N/A		#N/A	#N/A	#N/A		#N/A	#N/A	#N/A		#N/A	#N/A	#N/A		#N/A	#N/A	#N/A		#N/A	#N/A
#N/A	#N/A	#N/A		#N/A	#N/A	#N/A		#N/A	#N/A	#N/A		#N/A	#N/A	#N/A		#N/A	#N/A	#N/A		#N/A	#N/A	#N/A		#N/A	#N/A	#N/A		#N/A	#N/A	#N/A		#N/A	#N/A	#N/A		#N/A	#N/A	#N/A		#N/A	#N/A	#N/A		#N/A	#N/A	#N/A		#N/A	#N/A
#N/A	#N/A	#N/A		#N/A	#N/A	#N/A		#N/A	#N/A	#N/A		#N/A	#N/A	#N/A		#N/A	#N/A	#N/A		#N/A	#N/A	#N/A		#N/A	#N/A	#N/A		#N/A	#N/A	#N/A		#N/A	#N/A	#N/A		#N/A	#N/A	#N/A		#N/A	#N/A	#N/A		#N/A	#N/A	#N/A		#N/A	#N/A
#N/A	#N/A	#N/A		#N/A	#N/A	#N/A		#N/A	#N/A	#N/A		#N/A	#N/A	#N/A		#N/A	#N/A	#N/A		#N/A	#N/A	#N/A		#N/A	#N/A	#N/A		#N/A	#N/A	#N/A		#N/A	#N/A	#N/A		#N/A	#N/A	#N/A		#N/A	#N/A	#N/A		#N/A	#N/A	#N/A		#N/A	#N/A
#N/A	#N/A	#N/A		#N/A	#N/A	#N/A		#N/A	#N/A	#N/A		#N/A	#N/A	#N/A		#N/A	#N/A	#N/A		#N/A	#N/A	#N/A		#N/A	#N/A	#N/A		#N/A	#N/A	#N/A		#N/A	#N/A	#N/A		#N/A	#N/A	#N/A		#N/A	#N/A	#N/A		#N/A	#N/A	#N/A		#N/A	#N/A
		175.401				6747				0.624429				6.49799				0.226008				1.15891				0.0605339				0.0687457				0.836532				0.243683				0.152977				0.141283
[truncated: 4 more columns]

## Sheet: HA_RGV_TD
MaxJerk				MaxAnfJerk				MeanAcc				MaxAcc				MeanGyr				MaxGyr				SE_Acc				SE_Gyr				RMS_Acc				RMS_Gyr				CORR_AYZ				CORR_GXY				CORR_GXZ
176.226	122.974	#N/A		9510.14	14525.5	#N/A		2.33532	2.51476	#N/A		9.23729	9.20973	#N/A		1.42643	1.60718	#N/A		5.19723	6.026	#N/A		0.357193	0.417427	#N/A		0.300044	0.339717	#N/A		2.88231	3.04949	#N/A		1.8375	2.0213	#N/A		0.0322897	-0.0851609	#N/A		0.345255	0.564221	#N/A		-0.100252	0.0763805
250.462	267.7	#N/A		7847.55	8495.65	#N/A		3.27578	3.3388	#N/A		12.2038	11.8596	#N/A		1.50723	1.54198	#N/A		4.70546	6.91628	#N/A		0.397727	0.434814	#N/A		0.318837	0.370313	#N/A		4.00937	4.01222	#N/A		1.86484	1.90178	#N/A		0.805529	0.735278	#N/A		-0.362999	-0.422854	#N/A		0.2376	0.226528
280.177	206.833	#N/A		10791.3	10968	#N/A		3.00788	2.98664	#N/A		15.0547	11.6316	#N/A		1.46873	1.41405	#N/A		4.34993	4.43374	#N/A		0.296439	0.343464	#N/A		0.31322	0.390835	#N/A		3.88768	3.72738	#N/A		1.78767	1.72691	#N/A		0.734867	0.699106	#N/A		-0.345156	-0.193906	#N/A		-0.210926	-0.26475
500.915	290.267	#N/A		14204.1	15251.5	#N/A		4.46879	4.74258	#N/A		18.1918	18.1034	#N/A		2.06158	2.23759	#N/A		7.27401	9.7644	#N/A		0.433007	0.354334	#N/A		0.401254	0.309159	#N/A		5.35089	5.88647	#N/A		2.57567	2.95712	#N/A		-0.72638	-0.705671	#N/A		0.123624	0.144637	#N/A		-0.0892059	0.0399601
261.14	290.793	#N/A		14384.8	16808.8	#N/A		2.28612	2.61873	#N/A		10.42	11.5423	#N/A		1.67158	1.90253	#N/A		6.1014	6.51526	#N/A		0.46307	0.45518	#N/A		0.383656	0.406658	#N/A		2.7996	3.19573	#N/A		2.07023	2.30614	#N/A		-0.36294	-0.292225	#N/A		0.364377	0.0648904	#N/A		-0.0207668	-0.253748
219.448	105.35	#N/A		9778.81	6685.75	#N/A		2.54235	2.51921	#N/A		10.7671	8.18471	#N/A		1.43664	1.38102	#N/A		6.12936	5.33577	#N/A		0.449641	0.472627	#N/A		0.352853	0.327469	#N/A		3.07102	2.9574	#N/A		1.81006	1.7256	#N/A		-0.585194	-0.601559	#N/A		0.0913668	0.212096	#N/A		0.11375	0.0281543
445.198	366.379	#N/A		14102	11911.6	#N/A		2.65625	3.0744	#N/A		17.019	16.7166	#N/A		1.47816	1.63216	#N/A		6.37611	6.07261	#N/A		0.387654	0.405193	#N/A		0.335106	0.382209	#N/A		3.38583	3.85002	#N/A		1.85369	1.98567	#N/A		-0.620278	-0.559998	#N/A		0.202307	0.0288375	#N/A		-0.184244	-0.340653
174.606	184.042	#N/A		11539.9	14437.8	#N/A		1.69449	1.62844	#N/A		9.60979	7.6744	#N/A		1.44968	1.33424	#N/A		6.08954	6.82067	#N/A		0.374186	0.2885	#N/A		0.275537	0.200725	#N/A		2.14471	2.12351	#N/A		1.91106	1.83588	#N/A		-0.432717	-0.421988	#N/A		0.25062	0.340474	#N/A		0.384612	0.511128
203.795	165.513	#N/A		5896.66	6701.57	#N/A		1.70531	1.38437	#N/A		8.88097	12.0598	#N/A		1.21276	0.95569	#N/A		5.88877	8.41022	#N/A		0.279393	0.179753	#N/A		0.228978	0.149289	#N/A		2.23064	2.00898	#N/A		1.62164	1.41589	#N/A		-0.448176	-0.300059	#N/A		0.453592	0.355656	#N/A		0.536619	0.51338
200.541	140.991	#N/A		11345.4	7025.75	#N/A		1.76598	1.95173	#N/A		8.94183	6.78882	#N/A		1.62406	1.65354	#N/A		5.76235	5.26402	#N/A		0.353855	0.481231	#N/A		0.315409	0.390614	#N/A		2.16415	2.24343	#N/A		2.01751	1.96629	#N/A		-0.598812	-0.628573	#N/A		0.323278	0.395528	#N/A		0.213756	0.39214
334.901	405.621	#N/A		21852.4	24538	#N/A		2.89791	3.16089	#N/A		14.1981	17.6119	#N/A		2.02417	2.15217	#N/A		7.4391	7.34919	#N/A		0.364905	0.380655	#N/A		0.368161	0.30674	#N/A		3.65682	3.9913	#N/A		2.5559	2.75927	#N/A		-0.446902	-0.356254	#N/A		0.731095	0.754913	#N/A		0.634971	0.675939
243.036	240.233	#N/A		10873.6	9279.66	#N/A		2.9505	2.39572	#N/A		13.0131	11.1626	#N/A		1.69142	1.477	#N/A		6.77679	5.77254	#N/A		0.381197	0.430915	#N/A		0.324124	0.366783	#N/A		3.59192	2.86711	#N/A		2.14237	1.84794	#N/A		0.461951	0.515619	#N/A		-0.527844	-0.222511	#N/A		0.490518	0.0905314
239.791	231.183	#N/A		16743.2	13638.7	#N/A		3.97228	3.5516	#N/A		14.137	13.2709	#N/A		2.42928	2.15989	#N/A		8.04663	7.1106	#N/A		0.514113	0.411029	#N/A		0.472287	0.387894	#N/A		4.64549	4.28398	#N/A		2.90463	2.63749	#N/A		-0.644138	-0.68748	#N/A		0.325809	0.217974	#N/A		0.208879	0.186676
233.112	262.19	#N/A		11926.2	12758.6	#N/A		2.2608	2.16834	#N/A		10.9453	11.6384	#N/A		1.47246	1.43554	#N/A		6.32657	6.26439	#N/A		0.281035	0.352131	#N/A		0.205522	0.219513	#N/A		2.93329	2.75898	#N/A		2.01611	1.94856	#N/A		-0.636666	-0.455044	#N/A		0.347016	0.341414	#N/A		0.413587	0.451158
190.681	182.202	#N/A		10008	7377.61	#N/A		2.28521	2.84584	#N/A		9.60002	10.3558	#N/A		1.46626	1.63202	#N/A		6.1913	7.52159	#N/A		0.338656	0.369871	#N/A		0.24014	0.266247	#N/A		2.81942	3.44357	#N/A		1.96843	2.18441	#N/A		-0.572686	-0.542299	#N/A		0.217756	0.292969	#N/A		0.396003	0.50459
150.039	231.924	#N/A		6857.88	9597.86	#N/A		2.29405	2.66093	#N/A		9.55188	11.4293	#N/A		1.36879	1.54521	#N/A		5.49789	6.74964	#N/A		0.269776	0.324389	#N/A		0.226301	0.276769	#N/A		2.95379	3.35385	#N/A		1.79865	2.00503	#N/A		-0.79506	-0.621563	#N/A		0.425763	0.688685	#N/A		0.475756	0.622561
220.29	163.135	#N/A		10695.7	7187.77	#N/A		2.36802	2.2512	#N/A		10.7842	8.66458	#N/A		1.50493	1.57573	#N/A		5.81187	6.55765	#N/A		0.467872	0.442939	#N/A		0.371209	0.358347	#N/A		2.86265	2.74485	#N/A		1.90034	1.9976	#N/A		0.68621	0.686516	#N/A		-0.478035	-0.235848	#N/A		0.383666	0.389339
242.004	263.584	#N/A		13541.4	17441.3	#N/A		2.80724	3.53584	#N/A		11.1012	13.993	#N/A		1.73966	1.91423	#N/A		5.53061	5.82871	#N/A		0.392496	0.455004	#N/A		0.369152	0.456607	#N/A		3.26206	4.1068	#N/A		2.12821	2.27885	#N/A		-0.581404	-0.698388	#N/A		0.301022	0.480015	#N/A		0.725283	0.557501
241.233	235.83	#N/A		9138.16	11486.5	#N/A		2.17303	2.94483	#N/A		9.36516	10.5107	#N/A		1.28886	1.57554	#N/A		5.22415	6.73614	#N/A		0.314233	0.36061	#N/A		0.263209	0.269853	#N/A		2.72009	3.61227	#N/A		1.68133	2.03313	#N/A		-0.592707	-0.658618	#N/A		0.410999	0.245855	#N/A		0.376262	0.16952
267.114	184.393	#N/A		15262.8	13930.8	#N/A		3.87417	3.96236	#N/A		15.2652	12.2212	#N/A		2.2973	2.47639	#N/A		7.99708	7.77654	#N/A		0.429669	0.428742	#N/A		0.35672	0.341573	#N/A		4.63148	4.67242	#N/A		2.84801	3.05733	#N/A		-0.813328	-0.84219	#N/A		0.257363	0.265619	#N/A		0.0104429	-0.238861
#N/A	#N/A	#N/A		#N/A	#N/A	#N/A		#N/A	#N/A	#N/A		#N/A	#N/A	#N/A		#N/A	#N/A	#N/A		#N/A	#N/A	#N/A		#N/A	#N/A	#N/A		#N/A	#N/A	#N/A		#N/A	#N/A	#N/A		#N/A	#N/A	#N/A		#N/A	#N/A	#N/A		#N/A	#N/A	#N/A		#N/A	#N/A
#N/A	#N/A	#N/A		#N/A	#N/A	#N/A		#N/A	#N/A	#N/A		#N/A	#N/A	#N/A		#N/A	#N/A	#N/A		#N/A	#N/A	#N/A		#N/A	#N/A	#N/A		#N/A	#N/A	#N/A		#N/A	#N/A	#N/A		#N/A	#N/A	#N/A		#N/A	#N/A	#N/A		#N/A	#N/A	#N/A		#N/A	#N/A
#N/A	#N/A	#N/A		#N/A	#N/A	#N/A		#N/A	#N/A	#N/A		#N/A	#N/A	#N/A		#N/A	#N/A	#N/A		#N/A	#N/A	#N/A		#N/A	#N/A	#N/A		#N/A	#N/A	#N/A		#N/A	#N/A	#N/A		#N/A	#N/A	#N/A		#N/A	#N/A	#N/A		#N/A	#N/A	#N/A		#N/A	#N/A
#N/A	#N/A	#N/A		#N/A	#N/A	#N/A		#N/A	#N/A	#N/A		#N/A	#N/A	#N/A		#N/A	#N/A	#N/A		#N/A	#N/A	#N/A		#N/A	#N/A	#N/A		#N/A	#N/A	#N/A		#N/A	#N/A	#N/A		#N/A	#N/A	#N/A		#N/A	#N/A	#N/A		#N/A	#N/A	#N/A		#N/A	#N/A
[truncated: 4 more columns]

## Sheet: HA_RS_DCP
MaxJerk				MaxAnfJerk				MeanAcc				MaxAcc				MeanGyr				MaxGyr				SE_Acc				SE_Gyr				RMS_Acc				RMS_Gyr				CORR_AYZ				CORR_GXY				CORR_GXZ
428.077	482.91	38.7726		25711.3	25723.8	8.83137		3.65072	4.04727	0.280405		19.9357	24.0119	2.88229		2.56237	2.6661	0.0733476		11.2816	9.15637	1.5028		0.338243	0.330628	0.00538525		0.408077	0.440425	0.0228739		4.51431	5.0512	0.379642		3.05634	3.12318	0.0472582		0.242542	0.0379336	0.14468		-0.162004	-0.219597	0.0407239		0.405005	0.494365
584.254	611.033	18.9357		35955.6	30933.8	3550.93		4.28482	4.05814	0.160286		26.8658	26.6491	0.153243		2.65428	2.41617	0.168374		9.79296	8.43394	0.960975		0.31214	0.296714	0.0109078		0.493823	0.453845	0.0282682		5.30575	5.04219	0.186364		2.96679	2.72005	0.174467		-0.243875	-0.245978	0.00148714		0.305725	0.203064	0.0725922		0.295883	0.209196
429.634	409.046	14.5578		24419.8	25122	496.526		4.63426	3.78186	0.602736		23.9305	19.5281	3.11301		2.4036	2.02725	0.266123		6.60781	6.85576	0.175329		0.267533	0.269279	0.00123489		0.384309	0.335162	0.0347517		5.52777	4.5441	0.69556		2.75695	2.3394	0.295257		-0.121522	0.349422	0.333007		-0.736019	-0.693819	0.02984		0.231752	0.423234
465.312	527.451	43.9391		15823.3	22526.1	4739.59		3.15786	4.78039	1.1473		25.0259	27.7481	1.92485		1.71918	2.5739	0.604375		5.25409	7.24626	1.40868		0.131026	0.228828	0.0691563		0.184574	0.34252	0.111685		4.23708	6.1407	1.34607		2.11233	2.90051	0.557331		0.551918	-0.611747	0.822836		0.605483	0.420117	0.131074		-0.349733	0.65558
644.772	619.312	18.0028		27029.2	28239.5	855.82		3.1791	5.81921	1.86684		37.4749	39.8061	1.6484		1.9917	3.68636	1.19831		10.6807	10.6559	0.0175815		0.168809	0.208948	0.0283821		0.191087	0.324795	0.0945454		4.84041	7.64096	1.98028		2.68402	4.27279	1.12343		0.231984	0.319266	0.0617176		0.465224	0.382283	0.0586481		-0.0918405	-0.00220031
639.449	793.475	108.913		15040.3	28414.2	9456.75		2.76365	4.93774	1.53731		26.847	36.9769	7.16294		1.83032	2.72331	0.631439		5.52637	7.76894	1.58573		0.215811	0.198198	0.012454		0.296238	0.382848	0.0612424		3.84191	6.52642	1.89824		2.13972	3.01449	0.618557		-0.405794	-0.372895	0.0232631		-0.333122	-0.322396	0.00758462		-0.10076	0.0156636
310.293	305.245	3.56915		16921.7	11435.1	3879.62		1.93334	2.59572	0.468373		13.4263	13.4184	0.00559752		1.25137	1.71363	0.326867		7.32033	7.51937	0.140744		0.516341	0.395627	0.0853575		0.460693	0.368197	0.0654044		2.42137	3.11806	0.492634		1.5151	2.03982	0.371028		0.0416895	-0.0864335	0.0905967		-0.362561	-0.446635	0.0594487		0.105285	-0.0614655
530.172	731.41	142.297		33606.9	37987.9	3097.79		3.50536	6.37837	2.03153		23.7881	35.0307	7.94973		2.53097	3.67769	0.810855		7.24811	11.4686	2.98433		0.285421	0.294871	0.00668247		0.384636	0.452095	0.0477004		4.60449	8.26112	2.58563		2.88528	4.14792	0.89282		-0.0738476	0.223608	0.210333		-0.68423	-0.515993	0.118962		0.18628	0.260885
206.311	376.662	120.457		10369.2	9718.44	460.141		1.27915	1.71585	0.308788		11.3844	17.0366	3.99673		0.861944	1.0356	0.122791		4.45788	4.81373	0.251627		0.20991	0.241263	0.0221697		0.172217	0.175225	0.00212706		1.83972	2.39915	0.39558		1.17856	1.40995	0.163616		0.34927	0.353807	0.00320818		-0.180277	0.0142821	0.137574		0.0986692	0.121517
481.612	565.261	59.1482		22912.2	22213.9	493.768		4.25744	4.96033	0.497021		22.1542	24.4173	1.60023		2.78065	3.05434	0.193528		9.00745	10.9437	1.36911		0.457788	0.485267	0.0194307		0.358041	0.388206	0.0213297		5.18888	5.96407	0.548138		3.41399	3.75629	0.242047		0.201504	-0.0358223	0.167815		0.127561	-0.0381983	0.11721		0.389531	0.381055
710.43	831.934	85.9166		30371	42590	8640.08		4.57911	6.60595	1.43319		31.1846	43.2826	8.55462		2.54789	3.26012	0.503627		7.75553	9.12189	0.966158		0.327325	0.277039	0.0355579		0.352928	0.417097	0.0453742		5.59852	8.24164	1.86896		2.89566	3.61832	0.510998		0.0050459	-0.222125	0.160634		-0.0697459	0.0150515	0.0599608		-0.0615336	-0.142851
#N/A	#N/A	#N/A		#N/A	#N/A	#N/A		#N/A	#N/A	#N/A		#N/A	#N/A	#N/A		#N/A	#N/A	#N/A		#N/A	#N/A	#N/A		#N/A	#N/A	#N/A		#N/A	#N/A	#N/A		#N/A	#N/A	#N/A		#N/A	#N/A	#N/A		#N/A	#N/A	#N/A		#N/A	#N/A	#N/A		#N/A	#N/A
#N/A	#N/A	#N/A		#N/A	#N/A	#N/A		#N/A	#N/A	#N/A		#N/A	#N/A	#N/A		#N/A	#N/A	#N/A		#N/A	#N/A	#N/A		#N/A	#N/A	#N/A		#N/A	#N/A	#N/A		#N/A	#N/A	#N/A		#N/A	#N/A	#N/A		#N/A	#N/A	#N/A		#N/A	#N/A	#N/A		#N/A	#N/A
#N/A	#N/A	#N/A		#N/A	#N/A	#N/A		#N/A	#N/A	#N/A		#N/A	#N/A	#N/A		#N/A	#N/A	#N/A		#N/A	#N/A	#N/A		#N/A	#N/A	#N/A		#N/A	#N/A	#N/A		#N/A	#N/A	#N/A		#N/A	#N/A	#N/A		#N/A	#N/A	#N/A		#N/A	#N/A	#N/A		#N/A	#N/A
#N/A	#N/A	#N/A		#N/A	#N/A	#N/A		#N/A	#N/A	#N/A		#N/A	#N/A	#N/A		#N/A	#N/A	#N/A		#N/A	#N/A	#N/A		#N/A	#N/A	#N/A		#N/A	#N/A	#N/A		#N/A	#N/A	#N/A		#N/A	#N/A	#N/A		#N/A	#N/A	#N/A		#N/A	#N/A	#N/A		#N/A	#N/A
#N/A	#N/A	#N/A		#N/A	#N/A	#N/A		#N/A	#N/A	#N/A		#N/A	#N/A	#N/A		#N/A	#N/A	#N/A		#N/A	#N/A	#N/A		#N/A	#N/A	#N/A		#N/A	#N/A	#N/A		#N/A	#N/A	#N/A		#N/A	#N/A	#N/A		#N/A	#N/A	#N/A		#N/A	#N/A	#N/A		#N/A	#N/A
#N/A	#N/A	#N/A		#N/A	#N/A	#N/A		#N/A	#N/A	#N/A		#N/A	#N/A	#N/A		#N/A	#N/A	#N/A		#N/A	#N/A	#N/A		#N/A	#N/A	#N/A		#N/A	#N/A	#N/A		#N/A	#N/A	#N/A		#N/A	#N/A	#N/A		#N/A	#N/A	#N/A		#N/A	#N/A	#N/A		#N/A	#N/A
#N/A	#N/A	#N/A		#N/A	#N/A	#N/A		#N/A	#N/A	#N/A		#N/A	#N/A	#N/A		#N/A	#N/A	#N/A		#N/A	#N/A	#N/A		#N/A	#N/A	#N/A		#N/A	#N/A	#N/A		#N/A	#N/A	#N/A		#N/A	#N/A	#N/A		#N/A	#N/A	#N/A		#N/A	#N/A	#N/A		#N/A	#N/A
#N/A	#N/A	#N/A		#N/A	#N/A	#N/A		#N/A	#N/A	#N/A		#N/A	#N/A	#N/A		#N/A	#N/A	#N/A		#N/A	#N/A	#N/A		#N/A	#N/A	#N/A		#N/A	#N/A	#N/A		#N/A	#N/A	#N/A		#N/A	#N/A	#N/A		#N/A	#N/A	#N/A		#N/A	#N/A	#N/A		#N/A	#N/A
#N/A	#N/A	#N/A		#N/A	#N/A	#N/A		#N/A	#N/A	#N/A		#N/A	#N/A	#N/A		#N/A	#N/A	#N/A		#N/A	#N/A	#N/A		#N/A	#N/A	#N/A		#N/A	#N/A	#N/A		#N/A	#N/A	#N/A		#N/A	#N/A	#N/A		#N/A	#N/A	#N/A		#N/A	#N/A	#N/A		#N/A	#N/A
#N/A	#N/A	#N/A		#N/A	#N/A	#N/A		#N/A	#N/A	#N/A		#N/A	#N/A	#N/A		#N/A	#N/A	#N/A		#N/A	#N/A	#N/A		#N/A	#N/A	#N/A		#N/A	#N/A	#N/A		#N/A	#N/A	#N/A		#N/A	#N/A	#N/A		#N/A	#N/A	#N/A		#N/A	#N/A	#N/A		#N/A	#N/A
		74.9798				4525.04				1.14317				4.57927				0.55391				1.33175				0.037364				0.0578118				1.37766				0.552387				0.289146				0.0865721
[truncated: 4 more columns]

## Sheet: HA_RS_TD
MaxJerk				MaxAnfJerk				MeanAcc				MaxAcc				MeanGyr				MaxGyr				SE_Acc				SE_Gyr				RMS_Acc				RMS_Gyr				CORR_AYZ				CORR_GXY				CORR_GXZ
204.124	204.749	0.442037		9587.91	10360.6	#N/A		3.12761	3.46968	#N/A		9.69063	10.4894	#N/A		2.0994	2.30057	#N/A		5.18021	5.62948	#N/A		0.451738	0.489557	#N/A		0.313717	0.369698	#N/A		3.65701	4.01772	#N/A		2.45493	2.67815	#N/A		0.68696	0.555309	#N/A		-0.162681	-0.298793	#N/A		0.733196	0.683142
203.473	198.186	3.73826		6246.21	10755.4	#N/A		4.46986	5.01237	#N/A		9.94623	12.528	#N/A		2.30141	2.40111	#N/A		5.27581	5.16077	#N/A		0.418156	0.386884	#N/A		0.277912	0.305759	#N/A		5.00688	5.61071	#N/A		2.70141	2.8055	#N/A		-0.771252	-0.819864	#N/A		0.511017	0.589352	#N/A		0.604913	0.658407
192.871	249.892	40.32		13342.2	12414.8	#N/A		4.54099	4.73058	#N/A		12.7125	13.5161	#N/A		1.90097	2.08767	#N/A		4.81972	5.35296	#N/A		0.324746	0.354577	#N/A		0.333802	0.31717	#N/A		5.19268	5.41996	#N/A		2.23525	2.52548	#N/A		-0.758273	-0.719015	#N/A		0.164433	0.250153	#N/A		0.183488	0.0123856
304.653	274.711	21.1721		22069.5	15294.3	#N/A		6.67977	6.13738	#N/A		18.2328	18.1784	#N/A		3.2675	2.99118	#N/A		8.1623	8.48864	#N/A		0.503474	0.347188	#N/A		0.39674	0.293962	#N/A		7.46929	7.34369	#N/A		3.7054	3.65411	#N/A		0.545265	0.386163	#N/A		-0.568252	-0.630062	#N/A		0.422923	0.465676
212.102	331.788	84.631		16597.9	17543.4	#N/A		3.39707	4.22613	#N/A		11.4862	14.5453	#N/A		2.31759	3.1338	#N/A		7.57686	9.39306	#N/A		0.352768	0.453449	#N/A		0.298199	0.34974	#N/A		4.07149	4.96135	#N/A		2.85799	3.81311	#N/A		0.58529	0.461717	#N/A		-0.422762	-0.183074	#N/A		0.230799	0.32456
230.436	279.187	34.472		8933.17	13052.7	#N/A		3.38984	4.45419	#N/A		10.8126	16.0491	#N/A		1.86052	2.45037	#N/A		5.39911	7.07433	#N/A		0.445118	0.429888	#N/A		0.313546	0.312201	#N/A		3.95234	5.30034	#N/A		2.26003	2.98349	#N/A		0.00463349	0.222741	#N/A		-0.634895	-0.621646	#N/A		0.300688	0.381302
506.545	377.14	91.5033		17100	20926.4	#N/A		3.47478	4.64926	#N/A		20.8546	18.4416	#N/A		2.20652	2.57113	#N/A		6.98901	8.72094	#N/A		0.440697	0.459858	#N/A		0.378842	0.418969	#N/A		4.20515	5.35955	#N/A		2.58801	2.95296	#N/A		-0.0335052	0.320753	#N/A		-0.495791	-0.641852	#N/A		0.210313	0.240395
276.154	238.089	26.916		13787.5	15408.6	#N/A		3.09258	2.23435	#N/A		11.9602	14.8168	#N/A		1.87613	1.32152	#N/A		6.34172	8.12554	#N/A		0.425922	0.157936	#N/A		0.340113	0.140268	#N/A		3.68305	3.17405	#N/A		2.23196	1.87875	#N/A		0.516404	0.336109	#N/A		-0.423625	-0.219903	#N/A		0.240165	0.14883
245.271	323.128	55.0533		8677.04	17749.2	#N/A		2.64016	2.02776	#N/A		13.1979	15.4382	#N/A		1.42337	1.11697	#N/A		5.6955	7.04561	#N/A		0.253689	0.181635	#N/A		0.227521	0.153885	#N/A		3.34888	2.80212	#N/A		1.81216	1.56706	#N/A		0.595545	0.552781	#N/A		-0.207543	-0.209689	#N/A		0.106337	0.0776116
317.51	329.51	8.4856		18953.3	24314.3	#N/A		4.64224	5.25983	#N/A		15.3299	15.4488	#N/A		2.15455	2.48928	#N/A		5.20826	5.517	#N/A		0.310521	0.345585	#N/A		0.358706	0.43025	#N/A		5.20934	5.69152	#N/A		2.45475	2.71578	#N/A		0.624992	0.636044	#N/A		0.0775136	-0.425341	#N/A		-0.0866266	0.334027
228.466	146.724	57.8003		10682.5	9015.22	#N/A		3.68796	3.36091	#N/A		12.2027	9.36616	#N/A		2.05183	2.1291	#N/A		5.47754	5.22654	#N/A		0.275283	0.450705	#N/A		0.225287	0.327862	#N/A		4.35637	3.72041	#N/A		2.52431	2.42965	#N/A		-0.617438	-0.614899	#N/A		0.556971	0.579769	#N/A		0.594621	0.644316
296.04	259.963	25.5103		26079.4	22118.4	#N/A		6.56391	6.66192	#N/A		15.4862	15.0935	#N/A		3.25841	2.92894	#N/A		7.05116	6.82529	#N/A		0.343253	0.326566	#N/A		0.392059	0.379229	#N/A		7.01868	7.20729	#N/A		3.55903	3.29153	#N/A		0.7118	0.665712	#N/A		-0.380166	-0.327718	#N/A		0.438198	0.577035
199.441	206.175	4.76168		9888.91	8083.62	#N/A		3.14617	3.39545	#N/A		9.92018	11.1105	#N/A		2.19626	2.27029	#N/A		5.98475	5.4581	#N/A		0.428868	0.502028	#N/A		0.251897	0.321789	#N/A		3.73157	3.91898	#N/A		2.6163	2.64047	#N/A		0.605118	0.353815	#N/A		-0.493137	-0.51422	#N/A		0.442856	0.427202
180.658	201.348	14.6302		8129.94	12120.7	#N/A		3.39383	4.2854	#N/A		11.0452	13.0301	#N/A		2.0505	2.36621	#N/A		6.09164	6.56737	#N/A		0.302883	0.40512	#N/A		0.225347	0.307714	#N/A		4.1319	5.04417	#N/A		2.56023	2.8504	#N/A		0.574726	0.717832	#N/A		-0.524215	-0.430008	#N/A		0.441767	0.430309
145.301	151.615	4.46454		6005.43	8761.19	#N/A		3.3287	3.85678	#N/A		9.70975	10.8089	#N/A		2.0657	2.25944	#N/A		5.43004	6.06712	#N/A		0.320185	0.369327	#N/A		0.213579	0.251207	#N/A		4.03073	4.6239	#N/A		2.56089	2.77065	#N/A		0.627053	0.764014	#N/A		-0.319729	-0.19866	#N/A		0.456564	0.503102
163.571	236.633	51.6622		7726.18	11637.5	#N/A		3.50974	4.21883	#N/A		8.12153	11.9248	#N/A		1.95746	2.15977	#N/A		4.6395	5.45098	#N/A		0.459568	0.458167	#N/A		0.390102	0.437741	#N/A		3.80692	4.58139	#N/A		2.18172	2.38314	#N/A		0.691532	0.721804	#N/A		-0.0821131	-0.451884	#N/A		0.0330842	0.312268
187.016	168.392	13.1692		7093.2	6872.03	#N/A		2.39664	2.76233	#N/A		8.95011	8.79798	#N/A		1.34799	1.61896	#N/A		3.74363	4.77593	#N/A		0.373123	0.362114	#N/A		0.262509	0.251184	#N/A		2.7861	3.26042	#N/A		1.62121	1.9771	#N/A		0.765017	0.732934	#N/A		-0.66483	-0.729028	#N/A		0.567085	0.334617
161.121	192.783	22.3885		16844.5	19449.2	#N/A		4.472	5.21705	#N/A		10.3731	11.5205	#N/A		3.08492	3.1257	#N/A		7.92201	7.35864	#N/A		0.552299	0.521218	#N/A		0.418047	0.463815	#N/A		4.96577	5.68099	#N/A		3.55962	3.57737	#N/A		0.708325	0.510035	#N/A		-0.665543	-0.785102	#N/A		0.527871	0.392673
#N/A	#N/A	#N/A		#N/A	#N/A	#N/A		#N/A	#N/A	#N/A		#N/A	#N/A	#N/A		#N/A	#N/A	#N/A		#N/A	#N/A	#N/A		#N/A	#N/A	#N/A		#N/A	#N/A	#N/A		#N/A	#N/A	#N/A		#N/A	#N/A	#N/A		#N/A	#N/A	#N/A		#N/A	#N/A	#N/A		#N/A	#N/A
#N/A	#N/A	#N/A		#N/A	#N/A	#N/A		#N/A	#N/A	#N/A		#N/A	#N/A	#N/A		#N/A	#N/A	#N/A		#N/A	#N/A	#N/A		#N/A	#N/A	#N/A		#N/A	#N/A	#N/A		#N/A	#N/A	#N/A		#N/A	#N/A	#N/A		#N/A	#N/A	#N/A		#N/A	#N/A	#N/A		#N/A	#N/A
#N/A	#N/A	#N/A		#N/A	#N/A	#N/A		#N/A	#N/A	#N/A		#N/A	#N/A	#N/A		#N/A	#N/A	#N/A		#N/A	#N/A	#N/A		#N/A	#N/A	#N/A		#N/A	#N/A	#N/A		#N/A	#N/A	#N/A		#N/A	#N/A	#N/A		#N/A	#N/A	#N/A		#N/A	#N/A	#N/A		#N/A	#N/A
#N/A	#N/A	#N/A		#N/A	#N/A	#N/A		#N/A	#N/A	#N/A		#N/A	#N/A	#N/A		#N/A	#N/A	#N/A		#N/A	#N/A	#N/A		#N/A	#N/A	#N/A		#N/A	#N/A	#N/A		#N/A	#N/A	#N/A		#N/A	#N/A	#N/A		#N/A	#N/A	#N/A		#N/A	#N/A	#N/A		#N/A	#N/A
#N/A	#N/A	#N/A		#N/A	#N/A	#N/A		#N/A	#N/A	#N/A		#N/A	#N/A	#N/A		#N/A	#N/A	#N/A		#N/A	#N/A	#N/A		#N/A	#N/A	#N/A		#N/A	#N/A	#N/A		#N/A	#N/A	#N/A		#N/A	#N/A	#N/A		#N/A	#N/A	#N/A		#N/A	#N/A	#N/A		#N/A	#N/A
#N/A	#N/A	#N/A		#N/A	#N/A	#N/A		#N/A	#N/A	#N/A		#N/A	#N/A	#N/A		#N/A	#N/A	#N/A		#N/A	#N/A	#N/A		#N/A	#N/A	#N/A		#N/A	#N/A	#N/A		#N/A	#N/A	#N/A		#N/A	#N/A	#N/A		#N/A	#N/A	#N/A		#N/A	#N/A	#N/A		#N/A	#N/A
		43.8075
[truncated: 4 more columns]
