# Supplementary material for: Reliability and Discriminative Validity of Wearable Sensors for the Quantification of Upper Limb Movement Disorders in Individuals with Dyskinetic Cerebral Palsy
Source: Sensors (Basel). 2023 Feb 1;23(3):1574. doi: 10.3390/s23031574 (PMC9921560; doi:10.3390/s23031574)
Supplement: Supplementary file 1 [file sensors-23-01574-s001.zip › sensor_parameters_TRT_long_upperam.xls]

## Sheet: UA_RF_DCP
MaxJerk				MaxAnfJerk				MeanAcc				MaxAcc				MeanGyr				MaxGyr				SE_Acc				SE_Gyr				RMS_Acc				RMS_Gyr				CORR_AYZ				CORR_GXY				CORR_GXZ
180.068	166.866	9.33528		5611.84	4922.33	487.56		1.45893	1.64459	0.131277		8.06867	10.2754	1.5604		0.962567	1.01138	0.0345146		3.86863	5.78654	1.35617		0.289245	0.402882	0.0803533		0.197003	0.263492	0.0470148		1.811	1.99844	0.132539		1.23632	1.26373	0.0193808		0.210551	0.376982	0.117684		-0.172339	-0.230692	0.0412616		-0.124838	-0.113695
105.093	145.167	28.3371		8474.55	7383.02	771.828		1.39422	1.8206	0.301496		6.17298	7.13038	0.676985		1.24098	1.5158	0.19433		3.34645	3.75951	0.292077		0.490143	0.549662	0.0420862		0.380504	0.438858	0.0412627		1.64649	2.07901	0.305836		1.44844	1.70028	0.178078		-0.195892	-0.323614	0.0903128		0.546138	0.44597	0.0708297		0.0178091	0.109315
161.337	137.945	16.5401		8678.24	12431.8	2654.2		1.49479	1.50334	0.00603926		6.63726	5.86661	0.544933		1.31443	1.37971	0.0461576		3.65737	3.54661	0.0783224		0.435985	0.507274	0.0504094		0.397168	0.418782	0.0152836		1.80345	1.76705	0.0257414		1.47383	1.54557	0.0507251		0.164828	-0.090224	0.180349		0.155847	0.108523	0.0334628		-0.526913	-0.120596
166.333	92.7925	52.0007		6763.62	4403.84	1668.62		2.45818	1.54714	0.644204		7.7143	5.62478	1.47751		1.86451	1.41105	0.320646		4.57101	3.33723	0.872413		0.578984	0.595834	0.0119147		0.371226	0.328099	0.0304953		2.76618	1.72854	0.73372		2.14679	1.65704	0.346305		-0.708261	-0.57574	0.0937071		-0.27655	-0.56469	0.203745		-0.472872	-0.606516
96.5371	130.138	23.7591		6856.76	7768.01	644.356		1.41711	1.67614	0.183162		5.51868	6.81842	0.91906		1.25468	1.35461	0.0706592		3.04715	3.01419	0.0233026		0.531345	0.470618	0.0429404		0.353906	0.348069	0.00412672		1.60833	1.96787	0.25423		1.41871	1.54273	0.0876932		0.539267	-0.438572	0.691437		0.318558	0.134765	0.129961		-0.509211	-0.16386
163.082	205.814	30.2163		6095.22	13973.5	5570.81		1.53008	1.93067	0.283261		7.45592	11.5692	2.90853		1.16889	1.3414	0.121982		4.16019	4.1884	0.0199469		0.546781	0.477333	0.0491069		0.295771	0.37395	0.0552811		1.81678	2.38727	0.403402		1.48252	1.61405	0.0930019		0.261792	0.182497	0.0560697		-0.523353	-0.577663	0.0384029		-0.349979	-0.239789
190.952	236.733	32.372		12360.6	10796.3	1106.15		1.98161	2.48295	0.354503		11.0292	12.5874	1.10182		1.25207	1.81534	0.398288		4.69776	5.66446	0.683558		0.447101	0.435821	0.00797605		0.296186	0.434362	0.097705		2.38477	2.99561	0.431929		1.57879	2.04568	0.330141		0.372479	0.322437	0.0353847		0.554932	0.456741	0.0694318		-0.340327	-0.142339
195.15	184.624	7.44341		12100.6	11165.2	661.448		1.57953	1.90246	0.228345		9.12197	8.23943	0.624051		1.07576	1.37934	0.214667		2.9044	4.38679	1.04821		0.352367	0.372595	0.0143034		0.311316	0.363593	0.0369654		1.85536	2.27813	0.298942		1.21878	1.51815	0.211684		-0.276864	-0.321367	0.0314681		0.049138	-0.0661427	0.0815158		-0.278814	-0.0455767
139.992	91.5717	34.2381		6336.47	1741.67	3249.01		1.30665	1.14235	0.116177		7.09499	5.90418	0.842033		0.814911	0.8313	0.011589		3.34702	2.29653	0.742807		0.471651	0.538861	0.0475244		0.344621	0.324105	0.0145067		1.5708	1.31348	0.181955		0.987276	0.970123	0.0121288		0.236485	0.351774	0.0815213		-0.101281	0.114846	0.152825		-0.169727	0.025062
254.156	236.571	12.4342		19772.7	15019.4	3361.08		1.47852	1.9736	0.350077		10.2997	11.098	0.564495		1.19817	1.45581	0.182176		4.47325	4.63517	0.114493		0.512784	0.597579	0.0599593		0.340279	0.447245	0.0756359		1.79525	2.32434	0.374123		1.4596	1.70863	0.176088		0.0457257	-0.0160781	0.0437018		-0.338124	-0.267242	0.0501208		-0.165888	-0.217989
282.693	278.435	3.01094		13646.1	13320.8	230.038		1.68887	1.95213	0.18615		8.14497	10.8651	1.92342		1.68455	1.93167	0.174738		3.99881	4.51398	0.364284		0.544067	0.437954	0.0750336		0.390753	0.380391	0.00732723		1.93889	2.43943	0.353933		1.9146	2.15022	0.166608		-0.553544	-0.0219087	0.375923		-0.654641	-0.437688	0.153409		-0.791409	-0.489041
76.1699	98.2964	15.6458		3474.36	4845	969.188		0.758558	0.981202	0.157433		3.83257	4.78483	0.673349		0.512548	0.535025	0.0158937		2.63162	2.51977	0.0790911		0.437424	0.457766	0.0143846		0.175484	0.167064	0.00595406		0.928819	1.12398	0.138003		0.722286	0.756099	0.023909		0.113762	0.134543	0.0146941		0.102193	0.0938559	0.00589528		-0.408512	-0.287996
424.321	397.352	19.0703		39025.8	46512.5	5293.92		2.6334	2.42085	0.150293		17.2531	12.841	3.11978		2.11005	2.00808	0.0721052		9.86553	7.67296	1.55038		0.514877	0.452119	0.0443767		0.472969	0.395001	0.0551318		3.29055	3.02451	0.188114		2.41905	2.3348	0.0595791		0.0945764	0.146417	0.0366567		-0.228515	-0.154909	0.0520472		-0.360144	0.0447288
158.061	212.3	38.3534		11487.5	16036.6	3216.7		1.80826	2.09657	0.203864		8.08155	9.64907	1.1084		1.50092	1.64425	0.10135		4.07735	4.38124	0.214884		0.512233	0.499198	0.00921679		0.402388	0.382068	0.0143685		2.11884	2.45172	0.235383		1.74809	1.91955	0.121245		0.333165	-0.0427625	0.265821		0.0702874	0.075996	0.0040366		-0.325605	-0.402985
73.5455	101.786	19.9693		6448.23	11793.2	3779.49		1.08794	1.20508	0.0828248		4.63499	5.50908	0.618076		0.57385	0.833019	0.18326		3.58972	3.7329	0.101243		0.444673	0.474553	0.0211277		0.294107	0.313123	0.013446		1.21278	1.39859	0.131388		0.750399	1.05353	0.214346		-0.107411	0.22542	0.235347		-0.0940632	-0.131309	0.0263366		0.115238	0.124895
504.503	410.387	66.5499		63634.5	59959.1	2598.88		2.17844	2.38558	0.146464		20.5981	18.8242	1.25438		1.6834	1.92371	0.169919		11.6285	10.9617	0.471515		0.208888	0.258893	0.0353589		0.215883	0.247528	0.022377		3.3057	3.47072	0.116686		2.3241	2.49819	0.123096		-0.000851625	-0.300067	0.211577		0.0645757	0.134504	0.0494465		-0.219283	-0.334665
205.441	252.72	33.4311		22840.7	22032.7	571.388		2.05651	2.22689	0.120476		9.92747	12.7304	1.98198		1.57322	1.70929	0.0962186		5.58839	6.10053	0.362135		0.511571	0.453404	0.0411304		0.379406	0.412585	0.0234612		2.44025	2.72131	0.198741		1.83497	1.92532	0.0638901		0.0465551	-0.0141337	0.0429135		0.157202	0.245625	0.0625251		-0.130133	-0.282843
#N/A	#N/A	#N/A		#N/A	#N/A	#N/A		#N/A	#N/A	#N/A		#N/A	#N/A	#N/A		#N/A	#N/A	#N/A		#N/A	#N/A	#N/A		#N/A	#N/A	#N/A		#N/A	#N/A	#N/A		#N/A	#N/A	#N/A		#N/A	#N/A	#N/A		#N/A	#N/A	#N/A		#N/A	#N/A	#N/A		#N/A	#N/A
#N/A	#N/A	#N/A		#N/A	#N/A	#N/A		#N/A	#N/A	#N/A		#N/A	#N/A	#N/A		#N/A	#N/A	#N/A		#N/A	#N/A	#N/A		#N/A	#N/A	#N/A		#N/A	#N/A	#N/A		#N/A	#N/A	#N/A		#N/A	#N/A	#N/A		#N/A	#N/A	#N/A		#N/A	#N/A	#N/A		#N/A	#N/A
#N/A	#N/A	#N/A		#N/A	#N/A	#N/A		#N/A	#N/A	#N/A		#N/A	#N/A	#N/A		#N/A	#N/A	#N/A		#N/A	#N/A	#N/A		#N/A	#N/A	#N/A		#N/A	#N/A	#N/A		#N/A	#N/A	#N/A		#N/A	#N/A	#N/A		#N/A	#N/A	#N/A		#N/A	#N/A	#N/A		#N/A	#N/A
#N/A	#N/A	#N/A		#N/A	#N/A	#N/A		#N/A	#N/A	#N/A		#N/A	#N/A	#N/A		#N/A	#N/A	#N/A		#N/A	#N/A	#N/A		#N/A	#N/A	#N/A		#N/A	#N/A	#N/A		#N/A	#N/A	#N/A		#N/A	#N/A	#N/A		#N/A	#N/A	#N/A		#N/A	#N/A	#N/A		#N/A	#N/A
#N/A	#N/A	#N/A		#N/A	#N/A	#N/A		#N/A	#N/A	#N/A		#N/A	#N/A	#N/A		#N/A	#N/A	#N/A		#N/A	#N/A	#N/A		#N/A	#N/A	#N/A		#N/A	#N/A	#N/A		#N/A	#N/A	#N/A		#N/A	#N/A	#N/A		#N/A	#N/A	#N/A		#N/A	#N/A	#N/A		#N/A	#N/A
#N/A	#N/A	#N/A		#N/A	#N/A	#N/A		#N/A	#N/A	#N/A		#N/A	#N/A	#N/A		#N/A	#N/A	#N/A		#N/A	#N/A	#N/A		#N/A	#N/A	#N/A		#N/A	#N/A	#N/A		#N/A	#N/A	#N/A		#N/A	#N/A	#N/A		#N/A	#N/A	#N/A		#N/A	#N/A	#N/A		#N/A	#N/A
#N/A	#N/A	#N/A		#N/A	#N/A	#N/A		#N/A	#N/A	#N/A		#N/A	#N/A	#N/A		#N/A	#N/A	#N/A		#N/A	#N/A	#N/A		#N/A	#N/A	#N/A		#N/A	#N/A	#N/A		#N/A	#N/A	#N/A		#N/A	#N/A	#N/A		#N/A	#N/A	#N/A		#N/A	#N/A	#N/A		#N/A	#N/A
		30.4953				2726.3				0.256358				1.50111				0.174858				0.676326				0.0437693				0.0416996				0.309835				0.165856				0.226336				0.0902256
[truncated: 4 more columns]

## Sheet: UA_RF_TD
MaxJerk				MaxAnfJerk				MeanAcc				MaxAcc				MeanGyr				MaxGyr				SE_Acc				SE_Gyr				RMS_Acc				RMS_Gyr				CORR_AYZ				CORR_GXY				CORR_GXZ
67.0207	86.5607	#N/A		3238.89	3918.99	#N/A		1.6929	2.08098	#N/A		4.43506	5.4362	#N/A		1.53954	1.78017	#N/A		4.06869	4.54252	#N/A		0.500933	0.460192	#N/A		0.219865	0.231062	#N/A		1.91846	2.33369	#N/A		1.92101	2.2068	#N/A		0.159476	-0.264104	#N/A		-0.105652	-0.117453	#N/A		-0.119266	-0.120472
88.0811	80.755	#N/A		3741.48	4361.37	#N/A		2.27506	1.88523	#N/A		5.86165	5.1191	#N/A		1.73951	1.76478	#N/A		4.81684	4.39895	#N/A		0.419605	0.47668	#N/A		0.21952	0.259387	#N/A		2.62865	2.14507	#N/A		2.24266	2.1906	#N/A		0.638909	0.699429	#N/A		-0.0777054	0.00266387	#N/A		-0.042809	-0.114573
81.5024	107.872	#N/A		4134.66	5468.9	#N/A		1.79242	2.05855	#N/A		4.55166	5.43401	#N/A		1.36017	1.51741	#N/A		4.05546	4.00881	#N/A		0.544236	0.533889	#N/A		0.243744	0.248576	#N/A		1.93699	2.2342	#N/A		1.72957	1.86495	#N/A		0.675789	0.544829	#N/A		0.363762	0.50881	#N/A		-0.235408	-0.224686
193.691	203.887	#N/A		7493.49	6081.92	#N/A		2.54408	2.56387	#N/A		9.25886	8.79396	#N/A		1.81785	1.81083	#N/A		4.83504	5.65349	#N/A		0.540905	0.329443	#N/A		0.316727	0.188209	#N/A		2.93746	3.09268	#N/A		2.24187	2.46505	#N/A		-0.666407	-0.540056	#N/A		-0.419291	-0.356512	#N/A		-0.253956	-0.179243
84.9837	121.448	#N/A		3738.17	6355.49	#N/A		1.50154	1.97355	#N/A		5.03291	6.23794	#N/A		1.57166	1.90351	#N/A		4.88388	4.74272	#N/A		0.573419	0.621011	#N/A		0.209277	0.290722	#N/A		1.70796	2.21037	#N/A		2.01287	2.32026	#N/A		-0.220264	0.0617623	#N/A		-0.301901	-0.483284	#N/A		-0.274485	-0.349388
131.836	102.826	#N/A		5874.97	8964.27	#N/A		1.72302	2.07675	#N/A		6.03506	6.93295	#N/A		1.41875	1.68092	#N/A		3.73923	4.42677	#N/A		0.608342	0.565399	#N/A		0.317575	0.304164	#N/A		1.96247	2.37543	#N/A		1.72541	2.05566	#N/A		-0.669	-0.722066	#N/A		0.206049	0.0504204	#N/A		0.0182609	-0.101757
115.33	144.311	#N/A		5521.08	8948.38	#N/A		1.63665	1.99318	#N/A		5.14416	6.7219	#N/A		1.41198	1.82493	#N/A		4.0402	4.89369	#N/A		0.55573	0.591657	#N/A		0.307962	0.320025	#N/A		1.86885	2.25205	#N/A		1.74812	2.22411	#N/A		-0.516061	-0.540854	#N/A		0.0145696	-0.126002	#N/A		-0.139245	-0.22616
84.4608	89.3582	#N/A		8400.61	3690.83	#N/A		0.920062	0.903809	#N/A		3.76136	4.33598	#N/A		0.905277	0.741469	#N/A		2.38198	3.33892	#N/A		0.634407	0.419398	#N/A		0.355452	0.172143	#N/A		1.04176	1.05917	#N/A		1.07872	1.04682	#N/A		-0.314282	-0.111449	#N/A		-0.224228	0.023956	#N/A		-0.380337	0.0115878
70.5517	90.627	#N/A		4602.37	4080.32	#N/A		0.755969	0.661202	#N/A		3.21638	3.18135	#N/A		0.683968	0.533629	#N/A		2.35713	2.4352	#N/A		0.637602	0.450312	#N/A		0.308883	0.165372	#N/A		0.878476	0.789329	#N/A		0.855953	0.744952	#N/A		-0.289816	-0.00675341	#N/A		0.0904676	0.146839	#N/A		-0.279409	-0.00750984
49.9305	52.8964	#N/A		3334.65	1988.48	#N/A		0.90844	0.82474	#N/A		3.0103	2.56761	#N/A		1.04205	1.17508	#N/A		3.08534	2.74918	#N/A		0.397391	0.664315	#N/A		0.191131	0.24049	#N/A		1.05445	0.903556	#N/A		1.33908	1.39453	#N/A		-0.448553	-0.456011	#N/A		0.07433	-0.030275	#N/A		-0.220567	-0.284413
101.48	133.694	#N/A		4788.19	10376.6	#N/A		1.26724	1.40807	#N/A		4.41852	5.69324	#N/A		1.09375	1.25204	#N/A		3.28049	3.34697	#N/A		0.674709	0.602813	#N/A		0.44947	0.416437	#N/A		1.43319	1.63972	#N/A		1.2813	1.43402	#N/A		-0.440535	-0.447621	#N/A		0.742827	0.542343	#N/A		0.294078	0.00765844
86.9031	67.6546	#N/A		4839.98	4359.38	#N/A		1.29689	1.2681	#N/A		4.38157	3.30005	#N/A		1.13648	1.06954	#N/A		2.4493	2.52092	#N/A		0.531917	0.576629	#N/A		0.36984	0.376356	#N/A		1.45579	1.39369	#N/A		1.28814	1.22702	#N/A		-0.102919	-0.205138	#N/A		0.264616	0.341272	#N/A		-0.288049	-0.27355
92.5389	99.0813	#N/A		3971.48	3613.83	#N/A		1.44518	1.57338	#N/A		5.25419	4.47588	#N/A		1.12324	1.49548	#N/A		3.74524	3.37802	#N/A		0.297904	0.605641	#N/A		0.176815	0.369901	#N/A		1.73344	1.75034	#N/A		1.54462	1.73003	#N/A		-0.412722	-0.381575	#N/A		-0.194549	0.0891589	#N/A		-0.194897	-0.0734603
97.016	84.114	#N/A		5001.49	6233.31	#N/A		1.19435	1.34985	#N/A		3.6156	4.1005	#N/A		1.1897	1.35611	#N/A		3.60551	3.9839	#N/A		0.554997	0.542121	#N/A		0.207724	0.215338	#N/A		1.36157	1.51507	#N/A		1.5628	1.73374	#N/A		-0.593774	-0.595978	#N/A		0.377213	0.522885	#N/A		0.304943	0.22357
59.1108	65.5188	#N/A		2772.33	3144.11	#N/A		1.10906	1.2642	#N/A		2.81371	4.37812	#N/A		1.20367	1.28875	#N/A		3.01865	3.55476	#N/A		0.570216	0.558784	#N/A		0.246928	0.271633	#N/A		1.23103	1.44024	#N/A		1.46962	1.55923	#N/A		-0.462931	-0.212598	#N/A		0.0494622	0.0590582	#N/A		-0.451269	-0.233823
75.197	61.7437	#N/A		3273.65	3251.88	#N/A		1.00197	0.893918	#N/A		3.65334	3.15557	#N/A		1.02351	0.928641	#N/A		3.20772	2.74874	#N/A		0.49779	0.620945	#N/A		0.168981	0.222009	#N/A		1.18152	1.00708	#N/A		1.36941	1.174	#N/A		-0.491701	-0.0405162	#N/A		0.04898	-0.0513412	#N/A		-0.0316475	-0.156062
69.8686	60.6435	#N/A		5985.9	3586.69	#N/A		1.09356	1.11927	#N/A		3.77531	3.43856	#N/A		1.04121	1.06154	#N/A		2.59662	3.11658	#N/A		0.626945	0.615247	#N/A		0.293011	0.24105	#N/A		1.21334	1.23073	#N/A		1.23807	1.32452	#N/A		0.691302	0.790438	#N/A		0.278586	-0.0872608	#N/A		-0.311544	0.120209
70.8562	100.149	#N/A		3540.21	5657.54	#N/A		0.851968	1.02733	#N/A		3.76976	5.44846	#N/A		0.976888	1.16041	#N/A		2.27105	2.70479	#N/A		0.552686	0.522794	#N/A		0.26523	0.306619	#N/A		0.982642	1.24072	#N/A		1.14035	1.34138	#N/A		-0.605451	-0.570434	#N/A		0.0622142	-0.101657	#N/A		-0.157328	-0.266189
57.2719	54.4934	#N/A		4266.27	2741.02	#N/A		0.83398	1.03326	#N/A		2.9171	2.7988	#N/A		0.890603	1.15289	#N/A		2.40296	2.89525	#N/A		0.644168	0.710425	#N/A		0.252302	0.263136	#N/A		0.920038	1.13188	#N/A		1.1178	1.42987	#N/A		-0.44614	-0.737955	#N/A		-0.449772	-0.213276	#N/A		-0.748805	-0.402412
72.4379	57.3015	#N/A		5824.49	2408.12	#N/A		1.6594	2.04425	#N/A		4.35493	4.87149	#N/A		1.34517	1.7302	#N/A		3.62827	4.20321	#N/A		0.513925	0.594525	#N/A		0.206828	0.304038	#N/A		1.79519	2.20462	#N/A		1.6912	2.05393	#N/A		-0.707769	-0.883538	#N/A		-0.475594	-0.422142	#N/A		-0.547442	-0.494812
#N/A	#N/A	#N/A		#N/A	#N/A	#N/A		#N/A	#N/A	#N/A		#N/A	#N/A	#N/A		#N/A	#N/A	#N/A		#N/A	#N/A	#N/A		#N/A	#N/A	#N/A		#N/A	#N/A	#N/A		#N/A	#N/A	#N/A		#N/A	#N/A	#N/A		#N/A	#N/A	#N/A		#N/A	#N/A	#N/A		#N/A	#N/A
#N/A	#N/A	#N/A		#N/A	#N/A	#N/A		#N/A	#N/A	#N/A		#N/A	#N/A	#N/A		#N/A	#N/A	#N/A		#N/A	#N/A	#N/A		#N/A	#N/A	#N/A		#N/A	#N/A	#N/A		#N/A	#N/A	#N/A		#N/A	#N/A	#N/A		#N/A	#N/A	#N/A		#N/A	#N/A	#N/A		#N/A	#N/A
#N/A	#N/A	#N/A		#N/A	#N/A	#N/A		#N/A	#N/A	#N/A		#N/A	#N/A	#N/A		#N/A	#N/A	#N/A		#N/A	#N/A	#N/A		#N/A	#N/A	#N/A		#N/A	#N/A	#N/A		#N/A	#N/A	#N/A		#N/A	#N/A	#N/A		#N/A	#N/A	#N/A		#N/A	#N/A	#N/A		#N/A	#N/A
#N/A	#N/A	#N/A		#N/A	#N/A	#N/A		#N/A	#N/A	#N/A		#N/A	#N/A	#N/A		#N/A	#N/A	#N/A		#N/A	#N/A	#N/A		#N/A	#N/A	#N/A		#N/A	#N/A	#N/A		#N/A	#N/A	#N/A		#N/A	#N/A	#N/A		#N/A	#N/A	#N/A		#N/A	#N/A	#N/A		#N/A	#N/A
[truncated: 4 more columns]

## Sheet: UA_RGV_DCP
MaxJerk				MaxAnfJerk				MeanAcc				MaxAcc				MeanGyr				MaxGyr				SE_Acc				SE_Gyr				RMS_Acc				RMS_Gyr				CORR_AYZ				CORR_GXY				CORR_GXZ
208.188	112.455	67.6933		6693.97	4374.61	1640.03		1.51057	1.58033	0.0493299		11.3429	6.28245	3.57828		1.07716	1.09398	0.0118914		7.21355	3.43296	2.67328		0.312476	0.443766	0.0928359		0.190116	0.30048	0.0780392		2.03134	1.81016	0.156395		1.47952	1.31092	0.119217		0.124393	0.299459	0.12379		-0.0147167	-0.340772	0.230556		-0.151378	0.0666494
140.362	150.782	7.36787		10649.8	11258.8	430.653		1.40695	1.83223	0.300723		7.36175	8.68996	0.939187		1.06196	1.39008	0.232017		3.99006	3.82753	0.114929		0.297475	0.454543	0.111064		0.225113	0.358756	0.0945003		1.78115	2.20847	0.302155		1.39256	1.67551	0.200076		-0.102393	-0.0835588	0.013318		0.522697	0.358272	0.116266		0.465071	0.565107
146.226	141.071	3.64532		10652	12991.8	1654.52		1.55001	1.3801	0.120145		6.85134	6.48087	0.261965		1.35981	1.22782	0.0933321		4.06991	3.43655	0.447848		0.474901	0.419345	0.0392841		0.389724	0.382693	0.00497224		1.85093	1.66711	0.129975		1.5709	1.3903	0.127706		0.318897	0.143395	0.124099		-0.40325	-0.457053	0.0380445		0.0907711	0.503133
310.124	178.802	92.8588		15929.8	9912.86	4254.59		2.114	1.72338	0.276205		13.9313	9.66641	3.01572		1.46091	1.34968	0.0786522		5.82525	3.97696	1.30694		0.413776	0.490969	0.0545839		0.309065	0.340762	0.0224134		2.73039	2.14739	0.412244		1.81151	1.62323	0.133133		-0.266264	-0.428313	0.114585		0.280518	0.209217	0.050417		-0.0831096	-0.0110625
74.1863	321.586	174.938		5079.17	11727.8	4701.27		1.00094	1.84912	0.599751		3.92814	9.87077	4.20207		0.740639	1.29111	0.389238		2.04417	3.62134	1.11523		0.488083	0.515681	0.0195146		0.301092	0.416156	0.0813626		1.13456	2.21889	0.766735		0.878399	1.52985	0.460644		-0.298467	0.263779	0.397568		-0.00302343	-0.425591	0.2988		0.375273	0.346337
171.461	261.853	63.9169		7113.31	8153.45	735.495		1.23322	1.66821	0.307582		9.72706	13.395	2.5936		0.884947	1.12062	0.166645		3.95317	4.36123	0.28854		0.481727	0.465832	0.0112394		0.262079	0.325013	0.0445011		1.55042	2.1482	0.422693		1.16815	1.40232	0.165584		0.18279	-0.0588777	0.170885		-0.02885	-0.19972	0.120824		0.0914976	-0.0721689
154.617	230.766	53.8455		9158.95	21114.3	8453.7		1.54945	2.07144	0.369106		9.46072	10.6661	0.852364		0.964861	1.37555	0.290398		4.43475	4.69814	0.186244		0.352052	0.459072	0.0756745		0.195544	0.352235	0.110798		1.89921	2.48404	0.413535		1.31816	1.66718	0.246799		0.3778	0.372369	0.00384077		0.634754	0.513854	0.0854886		-0.318198	0.0559039
180.802	184.723	2.77248		12183.8	14238.6	1452.93		1.54937	1.75236	0.143534		7.88556	8.13362	0.175402		1.01406	1.27927	0.18753		3.46972	4.47093	0.70796		0.426434	0.415738	0.00756367		0.318829	0.419378	0.0710987		1.76468	2.08875	0.229152		1.2213	1.43967	0.154405		-0.281699	0.123915	0.286812		-0.239373	-0.317529	0.055265		-0.40986	0.0632037
180.983	220.979	28.2818		8968.92	17234.7	5844.76		1.38413	1.89139	0.35869		8.88561	9.47324	0.415522		1.06898	1.31103	0.171152		5.42898	4.30614	0.793964		0.482704	0.587265	0.0739362		0.248073	0.371506	0.087281		1.71515	2.27379	0.395014		1.40985	1.61132	0.142456		0.0267502	0.067087	0.0285224		-0.376484	-0.408793	0.0228459		0.01886	0.00970392
191.764	256.251	45.5986		9860.23	14699.3	3421.74		1.67372	1.94842	0.194241		6.54149	10.2529	2.62437		1.55033	1.6095	0.0418398		4.19428	4.69718	0.355605		0.517833	0.370963	0.103852		0.285277	0.183124	0.0722329		1.96579	2.43156	0.32935		1.89131	2.04542	0.108978		-0.299555	-0.0707039	0.161822		0.18184	0.292172	0.0780163		-0.204724	-0.0351404
96.0259	90.2636	4.07455		5603.8	4894.97	501.223		0.673699	0.893992	0.155771		4.12716	4.16792	0.0288252		0.477028	0.515235	0.0270168		2.51915	2.32318	0.13857		0.386205	0.489978	0.0733786		0.155913	0.222465	0.0470593		0.837642	1.03614	0.140357		0.680036	0.679906	9.14706e-05		0.0596412	-0.010711	0.0497466		0.406567	0.12841	0.196687		-0.0670654	0.05518
345.59	327.619	12.7073		28556.6	38079.5	6733.71		2.10341	1.86834	0.16622		13.7329	12.8542	0.621305		1.58286	1.46218	0.0853383		7.75431	7.05484	0.494596		0.546511	0.553151	0.00469517		0.51203	0.455947	0.0396572		2.59252	2.25977	0.23529		1.86789	1.74434	0.0873622		0.162848	0.166496	0.00257992		-0.203554	-0.391982	0.133239		-0.130854	0.280101
127.532	205.739	55.3009		7893.42	21045.8	9300.17		1.61916	1.94938	0.233501		6.05803	8.64943	1.8324		1.31801	1.49788	0.12719		3.53083	4.88532	0.957769		0.547602	0.54671	0.000630761		0.333155	0.390839	0.0407892		1.84798	2.26299	0.293455		1.60852	1.77178	0.115441		0.245869	0.0888088	0.111059		-0.0280069	-0.0632056	0.0248893		-0.266064	-0.349881
206.679	132.176	52.6812		22657	10513.6	8586.68		1.15984	1.22332	0.0448844		10.0643	6.6047	2.44633		0.635126	0.877567	0.171432		6.01845	4.5104	1.06636		0.456282	0.391224	0.0460031		0.281924	0.27219	0.00688271		1.34329	1.45514	0.0790855		0.85943	1.16715	0.217588		-0.0246454	0.166132	0.1349		0.129061	0.0845696	0.03146		0.308934	0.128747
571.088	333.033	168.33		69501.9	33042.5	25780.7		1.72677	2.18771	0.325937		23.4039	16.684	4.75167		1.19026	1.85569	0.470532		12.8156	15.7111	2.04739		0.250117	0.416734	0.117816		0.19801	0.323923	0.0890342		2.66442	3.12298	0.324249		1.77594	2.55982	0.554285		0.0231579	-0.0162931	0.0278961		0.109292	0.48296	0.264223		-0.142833	0.183202
234.596	232.805	1.26616		23243.2	19720.8	2490.75		1.82602	1.95444	0.0908089		11.4083	12.5094	0.778568		1.28634	1.42003	0.0945342		7.13256	7.6127	0.339511		0.46176	0.448221	0.00957368		0.319936	0.32066	0.000511974		2.23271	2.44462	0.149844		1.6042	1.73875	0.0951411		-0.0486984	-0.0367555	0.00844486		0.385531	0.386766	0.000873356		-0.0118157	0.125814
#N/A	#N/A	#N/A		#N/A	#N/A	#N/A		#N/A	#N/A	#N/A		#N/A	#N/A	#N/A		#N/A	#N/A	#N/A		#N/A	#N/A	#N/A		#N/A	#N/A	#N/A		#N/A	#N/A	#N/A		#N/A	#N/A	#N/A		#N/A	#N/A	#N/A		#N/A	#N/A	#N/A		#N/A	#N/A	#N/A		#N/A	#N/A
#N/A	#N/A	#N/A		#N/A	#N/A	#N/A		#N/A	#N/A	#N/A		#N/A	#N/A	#N/A		#N/A	#N/A	#N/A		#N/A	#N/A	#N/A		#N/A	#N/A	#N/A		#N/A	#N/A	#N/A		#N/A	#N/A	#N/A		#N/A	#N/A	#N/A		#N/A	#N/A	#N/A		#N/A	#N/A	#N/A		#N/A	#N/A
#N/A	#N/A	#N/A		#N/A	#N/A	#N/A		#N/A	#N/A	#N/A		#N/A	#N/A	#N/A		#N/A	#N/A	#N/A		#N/A	#N/A	#N/A		#N/A	#N/A	#N/A		#N/A	#N/A	#N/A		#N/A	#N/A	#N/A		#N/A	#N/A	#N/A		#N/A	#N/A	#N/A		#N/A	#N/A	#N/A		#N/A	#N/A
#N/A	#N/A	#N/A		#N/A	#N/A	#N/A		#N/A	#N/A	#N/A		#N/A	#N/A	#N/A		#N/A	#N/A	#N/A		#N/A	#N/A	#N/A		#N/A	#N/A	#N/A		#N/A	#N/A	#N/A		#N/A	#N/A	#N/A		#N/A	#N/A	#N/A		#N/A	#N/A	#N/A		#N/A	#N/A	#N/A		#N/A	#N/A
#N/A	#N/A	#N/A		#N/A	#N/A	#N/A		#N/A	#N/A	#N/A		#N/A	#N/A	#N/A		#N/A	#N/A	#N/A		#N/A	#N/A	#N/A		#N/A	#N/A	#N/A		#N/A	#N/A	#N/A		#N/A	#N/A	#N/A		#N/A	#N/A	#N/A		#N/A	#N/A	#N/A		#N/A	#N/A	#N/A		#N/A	#N/A
#N/A	#N/A	#N/A		#N/A	#N/A	#N/A		#N/A	#N/A	#N/A		#N/A	#N/A	#N/A		#N/A	#N/A	#N/A		#N/A	#N/A	#N/A		#N/A	#N/A	#N/A		#N/A	#N/A	#N/A		#N/A	#N/A	#N/A		#N/A	#N/A	#N/A		#N/A	#N/A	#N/A		#N/A	#N/A	#N/A		#N/A	#N/A
#N/A	#N/A	#N/A		#N/A	#N/A	#N/A		#N/A	#N/A	#N/A		#N/A	#N/A	#N/A		#N/A	#N/A	#N/A		#N/A	#N/A	#N/A		#N/A	#N/A	#N/A		#N/A	#N/A	#N/A		#N/A	#N/A	#N/A		#N/A	#N/A	#N/A		#N/A	#N/A	#N/A		#N/A	#N/A	#N/A		#N/A	#N/A
#N/A	#N/A	#N/A		#N/A	#N/A	#N/A		#N/A	#N/A	#N/A		#N/A	#N/A	#N/A		#N/A	#N/A	#N/A		#N/A	#N/A	#N/A		#N/A	#N/A	#N/A		#N/A	#N/A	#N/A		#N/A	#N/A	#N/A		#N/A	#N/A	#N/A		#N/A	#N/A	#N/A		#N/A	#N/A	#N/A		#N/A	#N/A
		74.2024				8071.82				0.272034				2.34473				0.20655				1.06985				0.065914				0.0650674				0.340239				0.227678				0.152977				0.141283
[truncated: 4 more columns]

## Sheet: UA_RGV_TD
MaxJerk				MaxAnfJerk				MeanAcc				MaxAcc				MeanGyr				MaxGyr				SE_Acc				SE_Gyr				RMS_Acc				RMS_Gyr				CORR_AYZ				CORR_GXY				CORR_GXZ
51.403	56.1766	#N/A		2361.92	2731.13	#N/A		1.53118	1.69127	#N/A		4.27328	4.80509	#N/A		1.24813	1.38412	#N/A		3.63999	3.89661	#N/A		0.425278	0.414966	#N/A		0.160714	0.188522	#N/A		1.79565	1.94404	#N/A		1.66159	1.78628	#N/A		0.0322897	-0.0851609	#N/A		0.345255	0.564221	#N/A		-0.100252	0.0763805
63.5614	53.7197	#N/A		4030.73	3596.45	#N/A		1.91038	1.61893	#N/A		5.01763	4.34712	#N/A		1.35859	1.35797	#N/A		3.86624	3.77111	#N/A		0.444255	0.516661	#N/A		0.220607	0.229926	#N/A		2.20505	1.83276	#N/A		1.7762	1.74366	#N/A		0.805529	0.735278	#N/A		-0.362999	-0.422854	#N/A		0.2376	0.226528
83.0785	75.24	#N/A		7501.88	4956.76	#N/A		1.66627	1.70978	#N/A		4.17858	4.71067	#N/A		1.32137	1.37654	#N/A		3.61041	3.38622	#N/A		0.553794	0.542711	#N/A		0.290889	0.28928	#N/A		1.814	1.86866	#N/A		1.64991	1.66102	#N/A		0.734867	0.699106	#N/A		-0.345156	-0.193906	#N/A		-0.210926	-0.26475
81.6971	87.1382	#N/A		3783.99	3135.9	#N/A		2.31863	2.30969	#N/A		6.99327	6.66031	#N/A		1.64004	1.5917	#N/A		4.24881	4.66983	#N/A		0.48635	0.450176	#N/A		0.244073	0.168537	#N/A		2.65035	2.66058	#N/A		2.08883	2.1265	#N/A		-0.72638	-0.705671	#N/A		0.123624	0.144637	#N/A		-0.0892059	0.0399601
90.1341	108.938	#N/A		6218.11	5079.01	#N/A		1.32774	1.55564	#N/A		4.01663	4.82485	#N/A		1.31921	1.53899	#N/A		3.93477	3.97191	#N/A		0.644383	0.612873	#N/A		0.284094	0.296314	#N/A		1.48001	1.73776	#N/A		1.65149	1.8749	#N/A		-0.36294	-0.292225	#N/A		0.364377	0.0648904	#N/A		-0.0207668	-0.253748
112.72	78.5083	#N/A		4506.66	3889.9	#N/A		1.31698	1.34247	#N/A		5.91634	3.86475	#N/A		1.11314	1.27119	#N/A		3.10159	3.27981	#N/A		0.608543	0.570227	#N/A		0.325481	0.28358	#N/A		1.5254	1.50721	#N/A		1.34687	1.53289	#N/A		-0.585194	-0.601559	#N/A		0.0913668	0.212096	#N/A		0.11375	0.0281543
135.966	114.73	#N/A		7059.93	8236.8	#N/A		1.43264	1.64142	#N/A		4.85643	5.01792	#N/A		1.26619	1.54359	#N/A		3.81683	4.42174	#N/A		0.595107	0.606285	#N/A		0.325806	0.333964	#N/A		1.63098	1.83844	#N/A		1.54144	1.86774	#N/A		-0.620278	-0.559998	#N/A		0.202307	0.0288375	#N/A		-0.184244	-0.340653
87.5758	71.6548	#N/A		5375.05	5476.59	#N/A		0.951048	0.873907	#N/A		4.24446	3.21327	#N/A		0.851819	0.787284	#N/A		2.56317	2.89112	#N/A		0.570545	0.509856	#N/A		0.318183	0.195924	#N/A		1.07941	0.989965	#N/A		1.05594	1.04215	#N/A		-0.432717	-0.421988	#N/A		0.25062	0.340474	#N/A		0.384612	0.511128
85.9369	109.206	#N/A		5097.84	3506.36	#N/A		0.704166	0.690959	#N/A		3.53602	4.83438	#N/A		0.640646	0.589483	#N/A		2.45351	3.5159	#N/A		0.574624	0.380391	#N/A		0.274447	0.143782	#N/A		0.839305	0.895266	#N/A		0.824381	0.84116	#N/A		-0.448176	-0.300059	#N/A		0.453592	0.355656	#N/A		0.536619	0.51338
33.0612	33.4845	#N/A		1772.13	1316.98	#N/A		0.760541	0.665525	#N/A		2.13386	1.79321	#N/A		0.854269	0.983416	#N/A		2.48249	2.42948	#N/A		0.61094	0.705265	#N/A		0.187308	0.224812	#N/A		0.843611	0.729284	#N/A		1.09573	1.1793	#N/A		-0.598812	-0.628573	#N/A		0.323278	0.395528	#N/A		0.213756	0.39214
95.7037	87.7417	#N/A		5592.41	4580.32	#N/A		1.17309	1.29789	#N/A		4.28375	5.13547	#N/A		1.0196	1.08442	#N/A		2.67707	2.85981	#N/A		0.641048	0.578642	#N/A		0.402479	0.371188	#N/A		1.36783	1.49542	#N/A		1.22082	1.29365	#N/A		-0.446902	-0.356254	#N/A		0.731095	0.754913	#N/A		0.634971	0.675939
62.8106	57.3724	#N/A		4473.04	4559.91	#N/A		1.26007	1.11932	#N/A		3.59764	3.11572	#N/A		0.993771	0.905035	#N/A		2.50796	2.35161	#N/A		0.563001	0.60331	#N/A		0.344587	0.347194	#N/A		1.39702	1.22638	#N/A		1.19517	1.08322	#N/A		0.461951	0.515619	#N/A		-0.527844	-0.222511	#N/A		0.490518	0.0905314
90.4261	75.0888	#N/A		4332.92	3149.28	#N/A		1.58882	1.28913	#N/A		5.11292	4.26366	#N/A		1.30684	1.19498	#N/A		3.26034	2.92328	#N/A		0.571114	0.518913	#N/A		0.327944	0.316673	#N/A		1.76771	1.46534	#N/A		1.55638	1.44137	#N/A		-0.644138	-0.68748	#N/A		0.325809	0.217974	#N/A		0.208879	0.186676
87.678	83.7774	#N/A		5159.94	4375.74	#N/A		1.13835	1.03255	#N/A		4.03744	4.17083	#N/A		1.09388	1.04072	#N/A		3.50649	3.16702	#N/A		0.542596	0.543192	#N/A		0.207472	0.231808	#N/A		1.30777	1.18232	#N/A		1.45446	1.35223	#N/A		-0.636666	-0.455044	#N/A		0.347016	0.341414	#N/A		0.413587	0.451158
46.6209	60.734	#N/A		2340.93	2796.56	#N/A		0.844142	1.0392	#N/A		2.93238	3.55256	#N/A		0.870226	1.05424	#N/A		2.67529	2.74785	#N/A		0.504515	0.482936	#N/A		0.217596	0.235829	#N/A		0.962609	1.19822	#N/A		1.10683	1.33794	#N/A		-0.572686	-0.542299	#N/A		0.217756	0.292969	#N/A		0.396003	0.50459
68.7699	64.5119	#N/A		2166	1932.68	#N/A		0.968282	0.942939	#N/A		3.20698	3.34003	#N/A		0.875612	0.870833	#N/A		2.86802	2.50988	#N/A		0.613559	0.637226	#N/A		0.184682	0.250132	#N/A		1.1055	1.07028	#N/A		1.19023	1.12216	#N/A		-0.79506	-0.621563	#N/A		0.425763	0.688685	#N/A		0.475756	0.622561
65.1877	65.7576	#N/A		5540.19	4968.59	#N/A		1.10979	1.09444	#N/A		3.54633	3.52141	#N/A		1.03905	0.961838	#N/A		3.12111	3.08685	#N/A		0.625384	0.611909	#N/A		0.214329	0.242069	#N/A		1.22417	1.19842	#N/A		1.33987	1.24408	#N/A		0.68621	0.686516	#N/A		-0.478035	-0.235848	#N/A		0.383666	0.389339
99.4306	112.016	#N/A		4275.41	5148.1	#N/A		0.860126	1.01424	#N/A		4.78014	5.76469	#N/A		0.908923	1.09494	#N/A		2.16683	2.54675	#N/A		0.501976	0.544584	#N/A		0.289491	0.307051	#N/A		1.03136	1.20681	#N/A		1.05684	1.27002	#N/A		-0.581404	-0.698388	#N/A		0.301022	0.480015	#N/A		0.725283	0.557501
61.7357	63.6177	#N/A		3088.23	3402.61	#N/A		0.830924	1.07291	#N/A		2.7767	2.96392	#N/A		0.843778	1.12395	#N/A		2.46157	3.28987	#N/A		0.651334	0.647801	#N/A		0.192706	0.214914	#N/A		0.934365	1.20268	#N/A		1.10614	1.46044	#N/A		-0.592707	-0.658618	#N/A		0.410999	0.245855	#N/A		0.376262	0.16952
60.4048	68.7413	#N/A		3477.65	4068.46	#N/A		1.63686	1.75063	#N/A		3.99545	4.17843	#N/A		1.42004	1.55168	#N/A		3.71764	3.82492	#N/A		0.581552	0.542691	#N/A		0.23684	0.263977	#N/A		1.76624	1.93289	#N/A		1.78413	1.91493	#N/A		-0.813328	-0.84219	#N/A		0.257363	0.265619	#N/A		0.0104429	-0.238861
#N/A	#N/A	#N/A		#N/A	#N/A	#N/A		#N/A	#N/A	#N/A		#N/A	#N/A	#N/A		#N/A	#N/A	#N/A		#N/A	#N/A	#N/A		#N/A	#N/A	#N/A		#N/A	#N/A	#N/A		#N/A	#N/A	#N/A		#N/A	#N/A	#N/A		#N/A	#N/A	#N/A		#N/A	#N/A	#N/A		#N/A	#N/A
#N/A	#N/A	#N/A		#N/A	#N/A	#N/A		#N/A	#N/A	#N/A		#N/A	#N/A	#N/A		#N/A	#N/A	#N/A		#N/A	#N/A	#N/A		#N/A	#N/A	#N/A		#N/A	#N/A	#N/A		#N/A	#N/A	#N/A		#N/A	#N/A	#N/A		#N/A	#N/A	#N/A		#N/A	#N/A	#N/A		#N/A	#N/A
#N/A	#N/A	#N/A		#N/A	#N/A	#N/A		#N/A	#N/A	#N/A		#N/A	#N/A	#N/A		#N/A	#N/A	#N/A		#N/A	#N/A	#N/A		#N/A	#N/A	#N/A		#N/A	#N/A	#N/A		#N/A	#N/A	#N/A		#N/A	#N/A	#N/A		#N/A	#N/A	#N/A		#N/A	#N/A	#N/A		#N/A	#N/A
#N/A	#N/A	#N/A		#N/A	#N/A	#N/A		#N/A	#N/A	#N/A		#N/A	#N/A	#N/A		#N/A	#N/A	#N/A		#N/A	#N/A	#N/A		#N/A	#N/A	#N/A		#N/A	#N/A	#N/A		#N/A	#N/A	#N/A		#N/A	#N/A	#N/A		#N/A	#N/A	#N/A		#N/A	#N/A	#N/A		#N/A	#N/A
[truncated: 4 more columns]

## Sheet: UA_RS_DCP
MaxJerk				MaxAnfJerk				MeanAcc				MaxAcc				MeanGyr				MaxGyr				SE_Acc				SE_Gyr				RMS_Acc				RMS_Gyr				CORR_AYZ				CORR_GXY				CORR_GXZ
146.378	140.672	4.03481		10322.8	12938.2	1849.37		1.55882	1.71875	0.113086		7.11539	8.0478	0.659314		1.38733	1.57926	0.135716		5.22356	4.78102	0.312926		0.470882	0.489169	0.0129308		0.392797	0.421558	0.0203372		1.89268	2.04381	0.106863		1.65704	1.85533	0.140216		0.242542	0.0379336	0.14468		-0.162004	-0.219597	0.0407239		0.405005	0.494365
167.984	186.301	12.9519		13547	14920.2	970.998		1.9252	1.83757	0.0619654		9.87675	9.62399	0.178728		1.66322	1.6251	0.0269489		5.89223	4.97794	0.6465		0.421173	0.388088	0.0233947		0.46706	0.458081	0.00634909		2.35788	2.23617	0.0860588		1.93267	1.8809	0.0366058		-0.243875	-0.245978	0.00148714		0.305725	0.203064	0.0725922		0.295883	0.209196
124.009	90.2547	23.8681		9453.62	7443.84	1421.13		1.65926	1.34407	0.222871		5.95446	4.60908	0.951329		1.83985	1.54269	0.210129		4.83057	4.40769	0.299024		0.550336	0.528496	0.0154432		0.335102	0.293838	0.0291783		1.86867	1.5134	0.251211		2.19312	1.88456	0.21819		-0.121522	0.349422	0.333007		-0.736019	-0.693819	0.02984		0.231752	0.423234
142.246	179.377	26.2551		8620.63	12131.1	2482.3		1.27622	1.85401	0.408557		8.27697	9.3457	0.755708		1.10749	1.69213	0.413406		3.8475	4.09767	0.176896		0.221927	0.35914	0.0970237		0.210764	0.366863	0.110379		1.6825	2.28249	0.424256		1.44497	1.97875	0.377442		0.551918	-0.611747	0.822836		0.605483	0.420117	0.131074		-0.349733	0.65558
303.393	351.879	34.285		22160.3	13000.1	6477.17		1.79562	2.24147	0.315262		14.3004	16.5977	1.62442		1.29578	2.05156	0.534414		7.71059	7.55379	0.110874		0.328926	0.315481	0.00950747		0.197033	0.335093	0.0976225		2.27551	3.05197	0.549037		1.71624	2.40714	0.488544		0.231984	0.319266	0.0617176		0.465224	0.382283	0.0586481		-0.0918405	-0.00220031
162.053	260.264	69.4457		10329.9	16674.8	4486.54		1.46846	1.73024	0.185102		8.17461	11.0325	2.02085		1.26322	1.66323	0.282854		3.98946	5.33292	0.949974		0.394031	0.314321	0.0563636		0.309154	0.347697	0.0272542		1.7253	2.18692	0.326419		1.50705	1.89748	0.276079		-0.405794	-0.372895	0.0232631		-0.333122	-0.322396	0.00758462		-0.10076	0.0156636
243.282	237.958	3.76462		6416.67	5353.74	751.606		1.27555	1.4055	0.0918883		7.53333	7.82954	0.209456		0.795345	1.10073	0.215943		4.94576	5.08777	0.100419		0.428356	0.358304	0.0495343		0.211419	0.232282	0.0147529		1.52405	1.70859	0.130488		1.03868	1.36403	0.230057		0.0416895	-0.0864335	0.0905967		-0.362561	-0.446635	0.0594487		0.105285	-0.0614655
230.76	345.886	81.4058		12607	22357.2	6894.46		1.51878	2.30832	0.558291		8.61359	11.95	2.35922		1.44172	1.81438	0.263507		4.53239	5.98971	1.03048		0.458376	0.485093	0.018892		0.273964	0.400235	0.0892869		1.86569	2.90312	0.733578		1.76897	2.17958	0.29035		-0.0738476	0.223608	0.210333		-0.68423	-0.515993	0.118962		0.18628	0.260885
113.069	144.175	21.9949		17353.1	8778.74	6062.97		1.11462	1.35081	0.167012		5.3471	7.15416	1.27779		0.584368	0.70825	0.0875976		3.85053	3.16574	0.484219		0.418273	0.443048	0.0175184		0.153426	0.161808	0.00592671		1.24986	1.498	0.175459		0.844281	0.994737	0.106389		0.34927	0.353807	0.00320818		-0.180277	0.0142821	0.137574		0.0986692	0.121517
439.248	268.163	120.975		45129.4	27064.8	12773.6		2.78454	2.18918	0.420986		19.4866	11.9417	5.33507		2.21381	1.85182	0.255969		10.5271	6.70106	2.7054		0.37383	0.549257	0.124045		0.398194	0.496803	0.0697269		3.59901	2.63853	0.679158		2.66248	2.15458	0.359141		0.413657	0.291896	0.0860979		0.0080392	-0.064269	0.0511296		-0.155487	0.123849
183.448	224.157	28.7854		12932.4	20571	5401.34		1.86197	2.2066	0.243688		8.32052	9.90873	1.12304		1.27215	1.59668	0.229475		3.67424	5.71373	1.44214		0.574448	0.580835	0.00451694		0.511422	0.513343	0.00135824		2.1499	2.53727	0.27391		1.46069	1.83997	0.268185		0.201504	-0.0358223	0.167815		0.127561	-0.0381983	0.11721		0.389531	0.381055
168.565	239.377	50.0718		13323.7	21763.6	5967.87		1.57485	1.61604	0.0291313		6.35066	9.62874	2.31796		1.06216	1.17306	0.0784214		5.23437	7.53219	1.62481		0.526192	0.426802	0.0702792		0.34587	0.282655	0.0446997		1.77228	1.91204	0.0988203		1.35186	1.53293	0.128037		0.209614	0.264449	0.0387746		-0.194618	-0.109446	0.0602256		0.277581	0.225372
729.903	520.425	148.123		119976	58970.5	43137.2		2.55944	2.07351	0.343601		28.5372	20.6652	5.56635		1.82033	1.4934	0.231174		21.6705	15.983	4.02166		0.235006	0.240525	0.00390209		0.224089	0.183396	0.0287739		3.9057	2.91309	0.701875		2.6363	2.25514	0.269524		0.0640383	0.015604	0.0342482		-0.0338274	0.425745	0.324967		-0.261044	-0.0678014
205.791	457.844	178.229		14351.9	40652.7	18597.5		2.09559	2.92993	0.589968		10.6955	18.5851	5.57876		1.6166	2.04221	0.300951		5.42308	9.44712	2.84543		0.465023	0.376836	0.0623575		0.364566	0.38626	0.0153401		2.51247	3.80418	0.913376		1.87511	2.36921	0.349379		0.0050459	-0.222125	0.160634		-0.0697459	0.0150515	0.0599608		-0.0615336	-0.142851
#N/A	#N/A	#N/A		#N/A	#N/A	#N/A		#N/A	#N/A	#N/A		#N/A	#N/A	#N/A		#N/A	#N/A	#N/A		#N/A	#N/A	#N/A		#N/A	#N/A	#N/A		#N/A	#N/A	#N/A		#N/A	#N/A	#N/A		#N/A	#N/A	#N/A		#N/A	#N/A	#N/A		#N/A	#N/A	#N/A		#N/A	#N/A
#N/A	#N/A	#N/A		#N/A	#N/A	#N/A		#N/A	#N/A	#N/A		#N/A	#N/A	#N/A		#N/A	#N/A	#N/A		#N/A	#N/A	#N/A		#N/A	#N/A	#N/A		#N/A	#N/A	#N/A		#N/A	#N/A	#N/A		#N/A	#N/A	#N/A		#N/A	#N/A	#N/A		#N/A	#N/A	#N/A		#N/A	#N/A
#N/A	#N/A	#N/A		#N/A	#N/A	#N/A		#N/A	#N/A	#N/A		#N/A	#N/A	#N/A		#N/A	#N/A	#N/A		#N/A	#N/A	#N/A		#N/A	#N/A	#N/A		#N/A	#N/A	#N/A		#N/A	#N/A	#N/A		#N/A	#N/A	#N/A		#N/A	#N/A	#N/A		#N/A	#N/A	#N/A		#N/A	#N/A
#N/A	#N/A	#N/A		#N/A	#N/A	#N/A		#N/A	#N/A	#N/A		#N/A	#N/A	#N/A		#N/A	#N/A	#N/A		#N/A	#N/A	#N/A		#N/A	#N/A	#N/A		#N/A	#N/A	#N/A		#N/A	#N/A	#N/A		#N/A	#N/A	#N/A		#N/A	#N/A	#N/A		#N/A	#N/A	#N/A		#N/A	#N/A
#N/A	#N/A	#N/A		#N/A	#N/A	#N/A		#N/A	#N/A	#N/A		#N/A	#N/A	#N/A		#N/A	#N/A	#N/A		#N/A	#N/A	#N/A		#N/A	#N/A	#N/A		#N/A	#N/A	#N/A		#N/A	#N/A	#N/A		#N/A	#N/A	#N/A		#N/A	#N/A	#N/A		#N/A	#N/A	#N/A		#N/A	#N/A
#N/A	#N/A	#N/A		#N/A	#N/A	#N/A		#N/A	#N/A	#N/A		#N/A	#N/A	#N/A		#N/A	#N/A	#N/A		#N/A	#N/A	#N/A		#N/A	#N/A	#N/A		#N/A	#N/A	#N/A		#N/A	#N/A	#N/A		#N/A	#N/A	#N/A		#N/A	#N/A	#N/A		#N/A	#N/A	#N/A		#N/A	#N/A
#N/A	#N/A	#N/A		#N/A	#N/A	#N/A		#N/A	#N/A	#N/A		#N/A	#N/A	#N/A		#N/A	#N/A	#N/A		#N/A	#N/A	#N/A		#N/A	#N/A	#N/A		#N/A	#N/A	#N/A		#N/A	#N/A	#N/A		#N/A	#N/A	#N/A		#N/A	#N/A	#N/A		#N/A	#N/A	#N/A		#N/A	#N/A
#N/A	#N/A	#N/A		#N/A	#N/A	#N/A		#N/A	#N/A	#N/A		#N/A	#N/A	#N/A		#N/A	#N/A	#N/A		#N/A	#N/A	#N/A		#N/A	#N/A	#N/A		#N/A	#N/A	#N/A		#N/A	#N/A	#N/A		#N/A	#N/A	#N/A		#N/A	#N/A	#N/A		#N/A	#N/A	#N/A		#N/A	#N/A
#N/A	#N/A	#N/A		#N/A	#N/A	#N/A		#N/A	#N/A	#N/A		#N/A	#N/A	#N/A		#N/A	#N/A	#N/A		#N/A	#N/A	#N/A		#N/A	#N/A	#N/A		#N/A	#N/A	#N/A		#N/A	#N/A	#N/A		#N/A	#N/A	#N/A		#N/A	#N/A	#N/A		#N/A	#N/A	#N/A		#N/A	#N/A
#N/A	#N/A	#N/A		#N/A	#N/A	#N/A		#N/A	#N/A	#N/A		#N/A	#N/A	#N/A		#N/A	#N/A	#N/A		#N/A	#N/A	#N/A		#N/A	#N/A	#N/A		#N/A	#N/A	#N/A		#N/A	#N/A	#N/A		#N/A	#N/A	#N/A		#N/A	#N/A	#N/A		#N/A	#N/A	#N/A		#N/A	#N/A
		78.4869				13612.3				0.318308				2.84243				0.266175				1.67261				0.0541174				0.0533932				0.472743				0.278583				0.257703				0.117803
[truncated: 4 more columns]

## Sheet: UA_RS_TD
MaxJerk				MaxAnfJerk				MeanAcc				MaxAcc				MeanGyr				MaxGyr				SE_Acc				SE_Gyr				RMS_Acc				RMS_Gyr				CORR_AYZ				CORR_GXY				CORR_GXZ
74.8946	76.1932	#N/A		4294.26	4336.86	#N/A		1.51939	1.50893	#N/A		4.25277	4.26548	#N/A		1.6499	1.72159	#N/A		5.28582	5.01736	#N/A		0.593835	0.61415	#N/A		0.218691	0.226489	#N/A		1.66194	1.65451	#N/A		2.11322	2.15767	#N/A		0.68696	0.555309	#N/A		-0.162681	-0.298793	#N/A		0.733196	0.683142
69.664	57.5904	#N/A		3841.8	3380.11	#N/A		1.57906	1.58207	#N/A		4.04839	4.30543	#N/A		1.61154	1.59129	#N/A		4.52003	4.31427	#N/A		0.55916	0.507759	#N/A		0.239246	0.228444	#N/A		1.75437	1.74284	#N/A		2.02701	2.03139	#N/A		-0.771252	-0.819864	#N/A		0.511017	0.589352	#N/A		0.604913	0.658407
80.2801	104.315	#N/A		5996.12	8175.73	#N/A		1.66081	1.96024	#N/A		4.80972	6.32877	#N/A		1.28391	1.41873	#N/A		3.74702	4.7115	#N/A		0.574482	0.525123	#N/A		0.320974	0.305142	#N/A		1.82661	2.18736	#N/A		1.60736	1.80039	#N/A		-0.758273	-0.719015	#N/A		0.164433	0.250153	#N/A		0.183488	0.0123856
191.075	128.48	#N/A		10272.1	9417.41	#N/A		2.38378	2.05865	#N/A		7.79601	6.25954	#N/A		2.17161	1.8917	#N/A		6.19635	5.56274	#N/A		0.568782	0.459026	#N/A		0.37216	0.25462	#N/A		2.72667	2.39024	#N/A		2.65906	2.44285	#N/A		0.545265	0.386163	#N/A		-0.568252	-0.630062	#N/A		0.422923	0.465676
104.897	145.648	#N/A		4945	7734.16	#N/A		1.62864	2.0122	#N/A		4.80392	6.87769	#N/A		1.37443	1.76711	#N/A		4.56162	5.21268	#N/A		0.587161	0.592894	#N/A		0.249577	0.306706	#N/A		1.8075	2.25164	#N/A		1.76651	2.24799	#N/A		0.58529	0.461717	#N/A		-0.422762	-0.183074	#N/A		0.230799	0.32456
85.7143	103.829	#N/A		4769.43	6621.91	#N/A		1.47002	1.96271	#N/A		4.22308	6.27516	#N/A		1.38293	1.79166	#N/A		4.27671	5.38879	#N/A		0.627545	0.575466	#N/A		0.278974	0.276001	#N/A		1.63244	2.18699	#N/A		1.73386	2.25577	#N/A		0.00463349	0.222741	#N/A		-0.634895	-0.621646	#N/A		0.300688	0.381302
161.154	127.513	#N/A		9682.11	9439.06	#N/A		1.69065	1.84168	#N/A		7.03132	5.49152	#N/A		1.51248	1.7096	#N/A		4.36067	4.73714	#N/A		0.53505	0.609977	#N/A		0.357976	0.358762	#N/A		1.92255	2.07016	#N/A		1.82898	2.07468	#N/A		-0.0335052	0.320753	#N/A		-0.495791	-0.641852	#N/A		0.210313	0.240395
118.3	198.617	#N/A		8650.76	29033.6	#N/A		1.24356	1.2866	#N/A		5.04397	8.18319	#N/A		1.17382	0.992759	#N/A		3.80311	9.88171	#N/A		0.64943	0.442484	#N/A		0.385491	0.164198	#N/A		1.42858	1.60112	#N/A		1.46788	1.45522	#N/A		0.516404	0.336109	#N/A		-0.423625	-0.219903	#N/A		0.240165	0.14883
128.035	124.895	#N/A		6472.67	6179.93	#N/A		1.27057	1.00573	#N/A		4.9216	5.21308	#N/A		0.989245	0.749827	#N/A		3.58996	2.99793	#N/A		0.558326	0.445173	#N/A		0.261491	0.151461	#N/A		1.44535	1.16122	#N/A		1.28479	1.06161	#N/A		0.595545	0.552781	#N/A		-0.207543	-0.209689	#N/A		0.106337	0.0776116
120.183	101.384	#N/A		6489.78	4787.62	#N/A		1.51694	1.58851	#N/A		4.82745	5.65425	#N/A		1.53097	1.66418	#N/A		3.86936	3.51876	#N/A		0.617516	0.519665	#N/A		0.330316	0.32748	#N/A		1.71473	1.83034	#N/A		1.79939	1.90374	#N/A		0.624992	0.636044	#N/A		0.0775136	-0.425341	#N/A		-0.0866266	0.334027
83.6968	78.865	#N/A		5284.89	5584.56	#N/A		1.46747	1.33903	#N/A		4.31661	3.59235	#N/A		1.30887	1.19597	#N/A		4.02188	3.17602	#N/A		0.39116	0.57395	#N/A		0.24349	0.368599	#N/A		1.66018	1.46891	#N/A		1.67879	1.41654	#N/A		-0.617438	-0.614899	#N/A		0.556971	0.579769	#N/A		0.594621	0.644316
73.8264	106.141	#N/A		4446.18	6032.59	#N/A		1.68423	1.60195	#N/A		4.63154	5.02952	#N/A		1.88632	1.85614	#N/A		3.91374	4.33476	#N/A		0.58197	0.548626	#N/A		0.361502	0.365066	#N/A		1.86219	1.7859	#N/A		2.1519	2.13963	#N/A		0.7118	0.665712	#N/A		-0.380166	-0.327718	#N/A		0.438198	0.577035
78.4918	86.9745	#N/A		4435.69	4522.47	#N/A		1.26452	1.37024	#N/A		3.54786	4.9181	#N/A		1.41497	1.44343	#N/A		3.69838	3.82524	#N/A		0.618096	0.651985	#N/A		0.244146	0.256698	#N/A		1.40272	1.52679	#N/A		1.78326	1.80549	#N/A		0.605118	0.353815	#N/A		-0.493137	-0.51422	#N/A		0.442856	0.427202
79.6847	77.7736	#N/A		3977.29	4370.16	#N/A		1.26444	1.5021	#N/A		3.79991	4.42567	#N/A		1.39459	1.6014	#N/A		4.20337	4.48918	#N/A		0.53659	0.540892	#N/A		0.173945	0.238107	#N/A		1.39864	1.67903	#N/A		1.82717	2.02522	#N/A		0.574726	0.717832	#N/A		-0.524215	-0.430008	#N/A		0.441767	0.430309
83.8359	90.2429	#N/A		3752.16	5161.78	#N/A		1.27257	1.36095	#N/A		4.07063	4.3442	#N/A		1.487	1.49762	#N/A		4.1387	4.38683	#N/A		0.612826	0.610895	#N/A		0.210737	0.224349	#N/A		1.40635	1.49214	#N/A		1.92219	1.91791	#N/A		0.627053	0.764014	#N/A		-0.319729	-0.19866	#N/A		0.456564	0.503102
68.4112	84.7604	#N/A		3597.81	4074.64	#N/A		1.06904	1.18076	#N/A		3.07453	3.81784	#N/A		1.26996	1.38224	#N/A		3.00218	3.10192	#N/A		0.646538	0.619524	#N/A		0.264263	0.298	#N/A		1.18734	1.33245	#N/A		1.51992	1.62465	#N/A		0.691532	0.721804	#N/A		-0.0821131	-0.451884	#N/A		0.0330842	0.312268
94.6084	72.9304	#N/A		3862.78	4574.94	#N/A		0.914049	1.08417	#N/A		3.26382	3.3864	#N/A		0.96286	1.0946	#N/A		2.91649	3.29247	#N/A		0.640727	0.656616	#N/A		0.218407	0.240584	#N/A		1.00832	1.18526	#N/A		1.24375	1.41897	#N/A		0.765017	0.732934	#N/A		-0.66483	-0.729028	#N/A		0.567085	0.334617
95.4588	87.7451	#N/A		5597.73	6570.09	#N/A		1.62262	1.79652	#N/A		4.4217	5.06762	#N/A		1.65358	1.92936	#N/A		4.50079	5.05766	#N/A		0.625029	0.580915	#N/A		0.318513	0.344883	#N/A		1.80074	1.99325	#N/A		2.01132	2.32442	#N/A		0.708325	0.510035	#N/A		-0.665543	-0.785102	#N/A		0.527871	0.392673
#N/A	#N/A	#N/A		#N/A	#N/A	#N/A		#N/A	#N/A	#N/A		#N/A	#N/A	#N/A		#N/A	#N/A	#N/A		#N/A	#N/A	#N/A		#N/A	#N/A	#N/A		#N/A	#N/A	#N/A		#N/A	#N/A	#N/A		#N/A	#N/A	#N/A		#N/A	#N/A	#N/A		#N/A	#N/A	#N/A		#N/A	#N/A
#N/A	#N/A	#N/A		#N/A	#N/A	#N/A		#N/A	#N/A	#N/A		#N/A	#N/A	#N/A		#N/A	#N/A	#N/A		#N/A	#N/A	#N/A		#N/A	#N/A	#N/A		#N/A	#N/A	#N/A		#N/A	#N/A	#N/A		#N/A	#N/A	#N/A		#N/A	#N/A	#N/A		#N/A	#N/A	#N/A		#N/A	#N/A
#N/A	#N/A	#N/A		#N/A	#N/A	#N/A		#N/A	#N/A	#N/A		#N/A	#N/A	#N/A		#N/A	#N/A	#N/A		#N/A	#N/A	#N/A		#N/A	#N/A	#N/A		#N/A	#N/A	#N/A		#N/A	#N/A	#N/A		#N/A	#N/A	#N/A		#N/A	#N/A	#N/A		#N/A	#N/A	#N/A		#N/A	#N/A
#N/A	#N/A	#N/A		#N/A	#N/A	#N/A		#N/A	#N/A	#N/A		#N/A	#N/A	#N/A		#N/A	#N/A	#N/A		#N/A	#N/A	#N/A		#N/A	#N/A	#N/A		#N/A	#N/A	#N/A		#N/A	#N/A	#N/A		#N/A	#N/A	#N/A		#N/A	#N/A	#N/A		#N/A	#N/A	#N/A		#N/A	#N/A
#N/A	#N/A	#N/A		#N/A	#N/A	#N/A		#N/A	#N/A	#N/A		#N/A	#N/A	#N/A		#N/A	#N/A	#N/A		#N/A	#N/A	#N/A		#N/A	#N/A	#N/A		#N/A	#N/A	#N/A		#N/A	#N/A	#N/A		#N/A	#N/A	#N/A		#N/A	#N/A	#N/A		#N/A	#N/A	#N/A		#N/A	#N/A
#N/A	#N/A	#N/A		#N/A	#N/A	#N/A		#N/A	#N/A	#N/A		#N/A	#N/A	#N/A		#N/A	#N/A	#N/A		#N/A	#N/A	#N/A		#N/A	#N/A	#N/A		#N/A	#N/A	#N/A		#N/A	#N/A	#N/A		#N/A	#N/A	#N/A		#N/A	#N/A	#N/A		#N/A	#N/A	#N/A		#N/A	#N/A
[truncated: 4 more columns]
