# Supplementary material for: Reliability and Discriminative Validity of Wearable Sensors for the Quantification of Upper Limb Movement Disorders in Individuals with Dyskinetic Cerebral Palsy
Source: Sensors (Basel). 2023 Feb 1;23(3):1574. doi: 10.3390/s23031574 (PMC9921560; doi:10.3390/s23031574)
Supplement: Supplementary file 1 [file sensors-23-01574-s001.zip › sensor_parameters_TRT_long_wrist.xls]

## Sheet: WR_RF_DCP
MaxJerk				MaxAnfJerk				MeanAcc				MaxAcc				MeanGyr				MaxGyr				RMS_Acc				RMS_Gyr				CORR_AXY				CORR_AXZ				CORR_AYZ				CORR_GXY				CORR_GXZ
449.073	457.049	5.63955		18898.3	33583.4	10384		2.5421	2.96801	0.301168		19.5286	26.5569	4.96979		1.4575	1.72555	0.189545		7.91258	17.8328	7.01466		3.34373	4.22175	0.620849		1.96005	2.61414	0.462514		-0.134434	0.130451	#N/A		-0.348494	0.0218809	#N/A		0.210551	0.376982	#N/A		-0.172339	-0.230692	#N/A		-0.124838	-0.113695
478.222	654.219	124.449		17552.2	19725.4	1536.64		2.84758	3.37644	0.37396		20.1041	26.0099	4.17603		1.63013	1.84109	0.149171		7.21179	6.88631	0.230154		3.65013	4.49516	0.597523		1.97214	2.15828	0.131619		-0.263689	-0.225033	#N/A		0.213163	0.103024	#N/A		-0.195892	-0.323614	#N/A		0.546138	0.44597	#N/A		0.0178091	0.109315
531.174	586.511	39.1286		30229.7	27741.1	1759.68		2.97624	3.16019	0.130069		21.6323	25.3016	2.59459		1.60156	1.55511	0.0328392		6.96731	6.64889	0.225157		3.88249	4.25523	0.263564		1.90088	1.83429	0.0470834		-0.00375511	-0.247466	#N/A		0.190809	-0.0455527	#N/A		0.164828	-0.090224	#N/A		0.155847	0.108523	#N/A		-0.526913	-0.120596
436.213	280.805	109.89		8675.34	7492.51	836.387		4.18531	2.70209	1.0488		21.9306	15.8478	4.30122		1.71383	1.22255	0.347389		4.86083	3.38209	1.04563		5.00899	3.20476	1.27578		2.02248	1.46981	0.390801		-0.403941	-0.266443	#N/A		0.448249	0.445822	#N/A		-0.708261	-0.57574	#N/A		-0.27655	-0.56469	#N/A		-0.472872	-0.606516
559.104	553.259	4.13312		16123.8	12068.3	2867.69		2.57614	3.16887	0.419119		24.3485	24.933	0.41328		1.21176	1.34031	0.0908979		3.79575	4.33036	0.378033		3.63872	4.33364	0.491385		1.42358	1.62911	0.145328		0.502827	0.322784	#N/A		0.117157	0.0559806	#N/A		0.539267	-0.438572	#N/A		0.318558	0.134765	#N/A		-0.509211	-0.16386
380.924	564.822	130.035		7598.73	15761.8	5772.13		2.8129	3.80139	0.698972		19.6742	27.7321	5.6978		1.40678	1.53057	0.0875362		4.9163	6.12278	0.853109		3.41526	4.76364	0.953445		1.84313	1.93372	0.0640573		0.035833	0.291637	#N/A		-0.242411	-0.188623	#N/A		0.261792	0.182497	#N/A		-0.523353	-0.577663	#N/A		-0.349979	-0.239789
573.854	517.267	40.0128		16701.7	22802.6	4313.95		3.03279	4.66926	1.15716		26.2672	25.087	0.834532		1.34277	2.12794	0.555204		5.21366	8.28363	2.17079		4.01979	5.61112	1.12524		1.75176	2.53603	0.554563		-0.290967	-0.107207	#N/A		-0.228712	-0.339848	#N/A		0.372479	0.322437	#N/A		0.554932	0.456741	#N/A		-0.340327	-0.142339
604.648	601.617	2.14298		15443	18011.5	1816.25		2.21787	3.43038	0.85737		22.83	24.64	1.27986		0.947687	1.40257	0.32165		3.90385	5.86191	1.38455		3.12243	4.53579	0.999396		1.14399	1.61284	0.331529		0.35334	0.536391	#N/A		-0.060144	-0.173973	#N/A		-0.276864	-0.321367	#N/A		0.049138	-0.0661427	#N/A		-0.278814	-0.0455767
198.81	199.05	0.169994		10647	14379.6	2639.38		1.95901	2.16947	0.148819		11.8606	12.0497	0.1337		0.996363	1.19495	0.140421		4.25236	5.91139	1.17312		2.4242	2.55097	0.0896449		1.19292	1.38325	0.134582		-0.179554	-0.252437	#N/A		-0.112605	-0.24491	#N/A		0.236485	0.351774	#N/A		-0.101281	0.114846	#N/A		-0.169727	0.025062
366.223	490.786	88.0791		22839.6	21640.3	848.035		2.36221	3.2159	0.603644		14.3168	18.1732	2.72689		1.1964	1.48492	0.204013		6.09667	7.10578	0.713548		2.85647	3.80384	0.669889		1.52648	1.81467	0.203787		0.215365	0.268586	#N/A		0.13133	0.162117	#N/A		0.0457257	-0.0160781	#N/A		-0.338124	-0.267242	#N/A		-0.165888	-0.217989
710.474	723.352	9.10605		14023	27409.9	9465.97		3.16821	4.04029	0.616654		28.771	30.1277	0.959327		1.79925	2.19861	0.282386		6.57248	6.99759	0.300596		4.75079	5.85781	0.782781		2.18117	2.57788	0.280514		0.116232	0.141181	#N/A		0.0824255	-0.102507	#N/A		-0.553544	-0.0219087	#N/A		-0.654641	-0.437688	#N/A		-0.791409	-0.489041
231.316	217.726	9.60987		5603.93	5361.68	171.299		1.61578	1.54532	0.0498251		10.7721	11.0068	0.165989		0.641403	0.625669	0.0111256		3.19096	3.53588	0.243897		1.87573	1.85196	0.0168052		0.928662	0.924897	0.002662		0.0999403	0.0057683	#N/A		0.0429836	0.0294672	#N/A		0.113762	0.134543	#N/A		0.102193	0.0938559	#N/A		-0.408512	-0.287996
904.413	759.601	102.397		63558	51498.3	8527.49		5.8235	4.93833	0.625909		38.1761	31.3473	4.82869		3.23613	2.95795	0.196698		16.935	13.4928	2.434		7.2847	6.16429	0.79225		3.91816	3.55389	0.257574		0.112645	0.0970056	#N/A		0.0880116	0.089744	#N/A		0.0945764	0.146417	#N/A		-0.228515	-0.154909	#N/A		-0.360144	0.0447288
466.134	794.525	232.207		21718.4	52412.9	21704.3		3.5295	4.37102	0.595049		16.8628	31.2122	10.1466		1.74458	2.03185	0.203127		6.33668	10.847	3.1893		4.24872	5.51783	0.897398		2.07471	2.49354	0.296159		0.118912	0.0881208	#N/A		-0.139115	-0.022241	#N/A		0.333165	-0.0427625	#N/A		0.0702874	0.075996	#N/A		-0.325605	-0.402985
166.727	273.307	75.3636		15839	18715	2033.64		1.31962	1.96004	0.452839		9.04137	12.0289	2.11249		0.738758	1.09478	0.251746		5.76054	6.75323	0.701939		1.56184	2.35359	0.559851		1.02047	1.4339	0.29234		-0.0415265	0.00625499	#N/A		-0.0100484	0.0688868	#N/A		-0.107411	0.22542	#N/A		-0.0940632	-0.131309	#N/A		0.115238	0.124895
953.832	851.576	72.3053		72875.6	27157.8	32327.4		3.64482	3.33674	0.217848		41.7335	34.4903	5.12171		2.01824	1.75427	0.186655		15.138	7.74534	5.22736		5.53583	4.98081	0.392459		2.81261	2.28705	0.371625		0.0614599	-0.246609	#N/A		0.08092	-0.0336419	#N/A		-0.000851625	-0.300067	#N/A		0.0645757	0.134504	#N/A		-0.219283	-0.334665
434.679	601.79	118.165		21903.3	20136.2	1249.55		3.85481	4.06307	0.147268		19.3199	23.8551	3.20685		1.71485	1.86696	0.107555		6.30324	6.77638	0.334562		4.67263	4.97431	0.213322		2.11174	2.18681	0.0530776		-0.130655	-0.0738942	#N/A		0.36284	0.305736	#N/A		0.0465551	-0.0141337	#N/A		0.157202	0.245625	#N/A		-0.130133	-0.282843
#N/A	#N/A	#N/A		#N/A	#N/A	#N/A		#N/A	#N/A	#N/A		#N/A	#N/A	#N/A		#N/A	#N/A	#N/A		#N/A	#N/A	#N/A		#N/A	#N/A	#N/A		#N/A	#N/A	#N/A		#N/A	#N/A	#N/A		#N/A	#N/A	#N/A		#N/A	#N/A	#N/A		#N/A	#N/A	#N/A		#N/A	#N/A
#N/A	#N/A	#N/A		#N/A	#N/A	#N/A		#N/A	#N/A	#N/A		#N/A	#N/A	#N/A		#N/A	#N/A	#N/A		#N/A	#N/A	#N/A		#N/A	#N/A	#N/A		#N/A	#N/A	#N/A		#N/A	#N/A	#N/A		#N/A	#N/A	#N/A		#N/A	#N/A	#N/A		#N/A	#N/A	#N/A		#N/A	#N/A
#N/A	#N/A	#N/A		#N/A	#N/A	#N/A		#N/A	#N/A	#N/A		#N/A	#N/A	#N/A		#N/A	#N/A	#N/A		#N/A	#N/A	#N/A		#N/A	#N/A	#N/A		#N/A	#N/A	#N/A		#N/A	#N/A	#N/A		#N/A	#N/A	#N/A		#N/A	#N/A	#N/A		#N/A	#N/A	#N/A		#N/A	#N/A
#N/A	#N/A	#N/A		#N/A	#N/A	#N/A		#N/A	#N/A	#N/A		#N/A	#N/A	#N/A		#N/A	#N/A	#N/A		#N/A	#N/A	#N/A		#N/A	#N/A	#N/A		#N/A	#N/A	#N/A		#N/A	#N/A	#N/A		#N/A	#N/A	#N/A		#N/A	#N/A	#N/A		#N/A	#N/A	#N/A		#N/A	#N/A
#N/A	#N/A	#N/A		#N/A	#N/A	#N/A		#N/A	#N/A	#N/A		#N/A	#N/A	#N/A		#N/A	#N/A	#N/A		#N/A	#N/A	#N/A		#N/A	#N/A	#N/A		#N/A	#N/A	#N/A		#N/A	#N/A	#N/A		#N/A	#N/A	#N/A		#N/A	#N/A	#N/A		#N/A	#N/A	#N/A		#N/A	#N/A
#N/A	#N/A	#N/A		#N/A	#N/A	#N/A		#N/A	#N/A	#N/A		#N/A	#N/A	#N/A		#N/A	#N/A	#N/A		#N/A	#N/A	#N/A		#N/A	#N/A	#N/A		#N/A	#N/A	#N/A		#N/A	#N/A	#N/A		#N/A	#N/A	#N/A		#N/A	#N/A	#N/A		#N/A	#N/A	#N/A		#N/A	#N/A
#N/A	#N/A	#N/A		#N/A	#N/A	#N/A		#N/A	#N/A	#N/A		#N/A	#N/A	#N/A		#N/A	#N/A	#N/A		#N/A	#N/A	#N/A		#N/A	#N/A	#N/A		#N/A	#N/A	#N/A		#N/A	#N/A	#N/A		#N/A	#N/A	#N/A		#N/A	#N/A	#N/A		#N/A	#N/A	#N/A		#N/A	#N/A
		92.3126				10486.1				0.587873				4.04381				0.234961				2.47296				0.722366				0.281554
[truncated: 4 more columns]

## Sheet: WR_RF_TD
MaxJerk				MaxAnfJerk				MeanAcc				MaxAcc				MeanGyr				MaxGyr				SE_Acc				SE_Gyr				RMS_Acc				RMS_Gyr				CORR_AYZ				CORR_GXY				CORR_GXZ
154.708	204.982	35.5486		4767.35	6878.93	#N/A		2.61457	3.07985	#N/A		9.10736	9.56631	#N/A		1.35047	1.6579	#N/A		4.04924	4.4902	#N/A		0.459997	0.452464	#N/A		0.414604	0.464721	#N/A		2.9678	3.49972	#N/A		1.62624	1.96274	#N/A		0.159476	-0.264104	#N/A		-0.105652	-0.117453	#N/A		-0.119266	-0.120472
164.457	182.249	12.5808		2447.59	3296.71	#N/A		3.08017	3.15504	#N/A		11.4658	10.8372	#N/A		1.43261	1.54619	#N/A		4.44776	4.11823	#N/A		0.407314	0.430752	#N/A		0.297658	0.352613	#N/A		3.65625	3.70599	#N/A		1.77952	1.85346	#N/A		0.638909	0.699429	#N/A		-0.0777054	0.00266387	#N/A		-0.042809	-0.114573
135.656	172.524	26.0698		7574.63	6439.31	#N/A		2.93152	3.08504	#N/A		9.23787	8.84773	#N/A		1.37519	1.62663	#N/A		4.37261	5.50804	#N/A		0.428583	0.472103	#N/A		0.333475	0.347158	#N/A		3.42423	3.54737	#N/A		1.72793	2.00481	#N/A		0.675789	0.544829	#N/A		0.363762	0.50881	#N/A		-0.235408	-0.224686
473.307	369.579	73.3472		9249.7	10757.4	#N/A		4.66321	4.71549	#N/A		16.0575	17.9543	#N/A		1.91316	1.83634	#N/A		5.05099	6.38405	#N/A		0.536793	0.24967	#N/A		0.476496	0.253223	#N/A		5.33662	5.80711	#N/A		2.27637	2.38428	#N/A		-0.666407	-0.540056	#N/A		-0.419291	-0.356512	#N/A		-0.253956	-0.179243
203.841	287.389	59.0778		13923.3	11914	#N/A		2.56744	3.26138	#N/A		9.938	11.337	#N/A		1.66027	2.11081	#N/A		5.56814	5.97669	#N/A		0.479444	0.56078	#N/A		0.393127	0.446047	#N/A		2.96399	3.72392	#N/A		2.03414	2.50659	#N/A		-0.220264	0.0617623	#N/A		-0.301901	-0.483284	#N/A		-0.274485	-0.349388
187.504	233.402	32.4551		7981.12	8012.26	#N/A		2.7374	3.32143	#N/A		10.2021	10.3245	#N/A		1.26762	1.49761	#N/A		4.0447	4.52388	#N/A		0.525186	0.508779	#N/A		0.405125	0.349904	#N/A		3.15293	3.83048	#N/A		1.5212	1.83339	#N/A		-0.669	-0.722066	#N/A		0.206049	0.0504204	#N/A		0.0182609	-0.101757
403.399	326.936	54.0676		9497.42	11200.9	#N/A		2.77384	3.50425	#N/A		16.6555	15.2038	#N/A		1.32296	1.72119	#N/A		4.16554	5.1056	#N/A		0.415787	0.503985	#N/A		0.363704	0.411547	#N/A		3.4218	4.11231	#N/A		1.62264	2.06457	#N/A		-0.516061	-0.540854	#N/A		0.0145696	-0.126002	#N/A		-0.139245	-0.22616
201.515	181.569	14.1037		10056.8	9803.98	#N/A		2.22666	2.04994	#N/A		8.55416	9.78301	#N/A		1.02665	0.79743	#N/A		3.29235	5.94756	#N/A		0.414703	0.206292	#N/A		0.3582	0.166384	#N/A		2.55135	2.4534	#N/A		1.2419	1.16087	#N/A		-0.314282	-0.111449	#N/A		-0.224228	0.023956	#N/A		-0.380337	0.0115878
188.513	168.144	14.4033		5817.73	5321.73	#N/A		1.9062	1.68234	#N/A		7.42679	9.91344	#N/A		0.825869	0.70696	#N/A		3.04535	6.54484	#N/A		0.375372	0.230365	#N/A		0.305925	0.151105	#N/A		2.18955	1.99971	#N/A		1.03238	1.0501	#N/A		-0.289816	-0.00675341	#N/A		0.0904676	0.146839	#N/A		-0.279409	-0.00750984
176.953	172.378	3.23499		7856.1	6665.82	#N/A		2.24964	2.39286	#N/A		9.05344	8.49306	#N/A		1.19681	1.28623	#N/A		3.79449	3.28019	#N/A		0.273792	0.420019	#N/A		0.252467	0.408083	#N/A		2.59282	2.65841	#N/A		1.50048	1.49546	#N/A		-0.448553	-0.456011	#N/A		0.07433	-0.030275	#N/A		-0.220567	-0.284413
257.53	443.607	131.576		7760.12	15340.9	#N/A		3.20819	3.67529	#N/A		11.2847	19.3064	#N/A		1.55272	1.48492	#N/A		4.07549	4.02983	#N/A		0.461742	0.436831	#N/A		0.372241	0.481423	#N/A		3.59885	4.21447	#N/A		1.8627	1.68281	#N/A		-0.440535	-0.447621	#N/A		0.742827	0.542343	#N/A		0.294078	0.00765844
237.019	157.63	56.1367		9775.44	10550.4	#N/A		3.05939	2.78918	#N/A		12.7008	8.3287	#N/A		1.14662	1.08219	#N/A		2.79504	3.10365	#N/A		0.38336	0.471672	#N/A		0.431464	0.476819	#N/A		3.50696	3.11913	#N/A		1.34678	1.28049	#N/A		-0.102919	-0.205138	#N/A		0.264616	0.341272	#N/A		-0.288049	-0.27355
204.522	266.358	43.7249		9168.72	16734	#N/A		3.24948	4.25379	#N/A		13.4305	13.0701	#N/A		1.41294	1.89594	#N/A		5.0371	4.47451	#N/A		0.222265	0.452722	#N/A		0.213893	0.518603	#N/A		3.94887	4.8384	#N/A		1.88025	2.13208	#N/A		-0.412722	-0.381575	#N/A		-0.194549	0.0891589	#N/A		-0.194897	-0.0734603
169.563	209.833	28.4747		5049.46	5925.96	#N/A		2.39932	2.60697	#N/A		9.48315	10.1595	#N/A		1.10229	1.17328	#N/A		3.2314	3.65102	#N/A		0.379374	0.403154	#N/A		0.282486	0.331345	#N/A		2.80676	3.0911	#N/A		1.39941	1.46187	#N/A		-0.593774	-0.595978	#N/A		0.377213	0.522885	#N/A		0.304943	0.22357
146.3	171.116	17.5477		5992.75	8431.11	#N/A		2.87644	3.42473	#N/A		8.51695	9.23671	#N/A		1.08721	1.13639	#N/A		3.73874	4.31328	#N/A		0.454883	0.508565	#N/A		0.373447	0.414324	#N/A		3.18574	3.76866	#N/A		1.30106	1.3637	#N/A		-0.462931	-0.212598	#N/A		0.0494622	0.0590582	#N/A		-0.451269	-0.233823
119.877	121.513	1.15639		3901.39	5721.55	#N/A		2.45638	2.71769	#N/A		7.45669	7.93541	#N/A		1.12273	0.963458	#N/A		3.93082	3.10427	#N/A		0.375821	0.428598	#N/A		0.265047	0.32066	#N/A		2.8202	3.08165	#N/A		1.45239	1.20947	#N/A		-0.491701	-0.0405162	#N/A		0.04898	-0.0513412	#N/A		-0.0316475	-0.156062
158.063	107.388	35.8327		6568.42	4173.16	#N/A		2.29191	2.1232	#N/A		8.73477	7.06423	#N/A		1.02031	1.0812	#N/A		3.10669	3.88441	#N/A		0.439866	0.468408	#N/A		0.404036	0.361868	#N/A		2.60345	2.428	#N/A		1.22663	1.3289	#N/A		0.691302	0.790438	#N/A		0.278586	-0.0872608	#N/A		-0.311544	0.120209
127.414	212.449	#N/A		5671.4	6587.72	#N/A		2.58648	3.07018	#N/A		8.8435	11.8279	#N/A		1.14579	1.41966	#N/A		3.06506	3.34934	#N/A		0.332847	0.36007	#N/A		0.360139	0.406828	#N/A		2.93538	3.47217	#N/A		1.33651	1.62376	#N/A		-0.605451	-0.570434	#N/A		0.0622142	-0.101657	#N/A		-0.157328	-0.266189
201.98	187.533	#N/A		3217.88	3479.28	#N/A		2.32796	2.93223	#N/A		9.3698	9.08726	#N/A		0.959338	1.22635	#N/A		2.82515	3.40326	#N/A		0.372752	0.443861	#N/A		0.253245	0.313975	#N/A		2.64849	3.3491	#N/A		1.21318	1.51157	#N/A		-0.44614	-0.737955	#N/A		-0.449772	-0.213276	#N/A		-0.748805	-0.402412
116.38	216.53	#N/A		6967.52	5250.07	#N/A		3.73321	4.06959	#N/A		10.7723	12.8796	#N/A		1.49641	1.78594	#N/A		5.01788	4.67121	#N/A		0.291162	0.466273	#N/A		0.255222	0.397942	#N/A		4.27722	4.61205	#N/A		1.88998	2.14899	#N/A		-0.707769	-0.883538	#N/A		-0.475594	-0.422142	#N/A		-0.547442	-0.494812
#N/A	#N/A	#N/A		#N/A	#N/A	#N/A		#N/A	#N/A	#N/A		#N/A	#N/A	#N/A		#N/A	#N/A	#N/A		#N/A	#N/A	#N/A		#N/A	#N/A	#N/A		#N/A	#N/A	#N/A		#N/A	#N/A	#N/A		#N/A	#N/A	#N/A		#N/A	#N/A	#N/A		#N/A	#N/A	#N/A		#N/A	#N/A
#N/A	#N/A	#N/A		#N/A	#N/A	#N/A		#N/A	#N/A	#N/A		#N/A	#N/A	#N/A		#N/A	#N/A	#N/A		#N/A	#N/A	#N/A		#N/A	#N/A	#N/A		#N/A	#N/A	#N/A		#N/A	#N/A	#N/A		#N/A	#N/A	#N/A		#N/A	#N/A	#N/A		#N/A	#N/A	#N/A		#N/A	#N/A
#N/A	#N/A	#N/A		#N/A	#N/A	#N/A		#N/A	#N/A	#N/A		#N/A	#N/A	#N/A		#N/A	#N/A	#N/A		#N/A	#N/A	#N/A		#N/A	#N/A	#N/A		#N/A	#N/A	#N/A		#N/A	#N/A	#N/A		#N/A	#N/A	#N/A		#N/A	#N/A	#N/A		#N/A	#N/A	#N/A		#N/A	#N/A
#N/A	#N/A	#N/A		#N/A	#N/A	#N/A		#N/A	#N/A	#N/A		#N/A	#N/A	#N/A		#N/A	#N/A	#N/A		#N/A	#N/A	#N/A		#N/A	#N/A	#N/A		#N/A	#N/A	#N/A		#N/A	#N/A	#N/A		#N/A	#N/A	#N/A		#N/A	#N/A	#N/A		#N/A	#N/A	#N/A		#N/A	#N/A
		48.5948
[truncated: 4 more columns]

## Sheet: WR_RGV_DCP
MaxJerk				MaxAnfJerk				MeanAcc				MaxAcc				MeanGyr				MaxGyr				SE_Acc				SE_Gyr				RMS_Acc				RMS_Gyr				CORR_AYZ				CORR_GXY				CORR_GXZ
998.732	341.685	464.602		34164.5	21861.2	8699.72		2.81088	2.52993	0.198658		38.6245	14.846	16.814		1.6091	1.51856	0.0640228		12.0657	10.4261	1.15937		0.161021	0.387291	0.159997		0.202419	0.295151	0.0655716		4.36714	3.13199	0.873382		2.31016	1.98468	0.230148		0.124393	0.299459	0.12379		-0.0147167	-0.340772	0.230556		-0.151378	0.0666494
661.166	757.145	67.8671		20546	19951.7	420.23		2.46556	3.14331	0.479242		24.5531	28.1358	2.5334		1.24046	1.53581	0.208843		7.83693	8.53895	0.4964		0.217906	0.31458	0.068359		0.218882	0.349313	0.0922293		3.4823	4.45365	0.686849		1.74587	2.05674	0.219818		-0.102393	-0.0835588	0.013318		0.522697	0.358272	0.116266		0.465071	0.565107
531.736	719.002	132.416		24342.6	27557.5	2273.26		3.00833	3.08004	0.0507075		23.3226	27.2111	2.7496		1.50725	1.58269	0.0533442		8.58665	7.30775	0.90432		0.303617	0.2437	0.0423678		0.327882	0.356109	0.0199598		4.00368	4.36898	0.258302		1.97279	1.98126	0.00599054		0.318897	0.143395	0.124099		-0.40325	-0.457053	0.0380445		0.0907711	0.503133
698.29	669.291	20.5053		18174.3	18459.4	201.566		3.39055	3.16072	0.162512		32.6443	29.2356	2.41027		1.07228	1.12305	0.0358992		5.23433	4.92476	0.218902		0.273374	0.289499	0.0114023		0.298165	0.322177	0.016979		5.25536	4.63314	0.439975		1.41504	1.4307	0.0110752		-0.266264	-0.428313	0.114585		0.280518	0.209217	0.050417		-0.0831096	-0.0110625
226.872	533.647	216.923		8275.36	12618.9	3071.31		1.60332	3.1489	1.0929		11.7905	23.9293	8.58346		0.732488	1.14539	0.291967		3.02014	3.67868	0.465656		0.275384	0.391466	0.082082		0.283015	0.384738	0.0719289		2.12733	4.12242	1.41074		0.976125	1.38091	0.286224		-0.298467	0.263779	0.397568		-0.00302343	-0.425591	0.2988		0.375273	0.346337
337.592	586.142	175.751		6196.73	17548.8	8027.11		2.30166	3.10724	0.569635		17.7576	26.3676	6.08817		1.00117	1.19627	0.13795		4.06317	4.88945	0.584265		0.333578	0.31677	0.0118848		0.230732	0.273571	0.0302916		2.86165	4.10681	0.880463		1.35114	1.57388	0.157501		0.18279	-0.0588777	0.170885		-0.02885	-0.19972	0.120824		0.0914976	-0.0721689
492.76	645.444	107.964		12311.7	30745.8	13034.8		2.48286	3.80927	0.93792		19.8693	25.9842	4.32391		1.04764	1.77371	0.513403		6.59694	11.0244	3.13068		0.244263	0.336047	0.0649013		0.166227	0.254695	0.0625566		3.25174	4.79315	1.08994		1.54612	2.34221	0.562921		0.3778	0.372369	0.00384077		0.634754	0.513854	0.0854886		-0.318198	0.0559039
690.857	787.019	67.9966		19235.6	18501.3	519.283		2.2347	3.2608	0.725565		26.8858	30.3176	2.42664		0.954778	1.43351	0.338517		6.27266	6.17478	0.0692159		0.260185	0.280597	0.0144341		0.316845	0.409612	0.065596		3.2793	4.60254	0.935671		1.22553	1.71434	0.345638		-0.281699	0.123915	0.286812		-0.239373	-0.317529	0.055265		-0.40986	0.0632037
323.205	334.713	8.13728		16155.1	18518.9	1671.47		2.20888	3.1042	0.633081		13.6065	14.4267	0.579976		1.1285	1.35343	0.159053		6.62806	6.3873	0.170246		0.38616	0.481138	0.0671594		0.317924	0.435875	0.0834037		2.73767	3.74576	0.712831		1.48702	1.68901	0.142832		0.0267502	0.067087	0.0285224		-0.376484	-0.408793	0.0228459		0.01886	0.00970392
480.459	799.798	225.807		11978.7	22562.2	7483.66		2.7098	3.45128	0.524306		19.9993	30.0413	7.10078		1.52326	1.64735	0.0877433		4.9004	6.4418	1.08993		0.313658	0.190521	0.0870715		0.307204	0.213168	0.0664934		3.63331	5.13453	1.06153		1.86292	2.15442	0.206123		-0.299555	-0.0707039	0.161822		0.18184	0.292172	0.0780163		-0.204724	-0.0351404
198.039	211.343	9.4072		6968.59	5758.71	855.518		1.48035	1.55051	0.0496089		9.6044	9.05269	0.390117		0.658217	0.676727	0.0130889		3.91814	3.36013	0.394574		0.251766	0.304	0.0369355		0.131264	0.183821	0.0371634		1.76564	1.83625	0.0499235		0.974612	0.926547	0.0339872		0.0596412	-0.010711	0.0497466		0.406567	0.12841	0.196687		-0.0670654	0.05518
933.62	800.553	94.0929		69180.5	49658.9	13803.8		4.50146	3.88309	0.437252		36.458	32.053	3.11484		2.61328	2.70934	0.0679184		15.9883	18.3342	1.65883		0.451887	0.451135	0.000531758		0.453184	0.426589	0.0188054		5.75339	4.90697	0.598514		3.23485	3.39333	0.112064		0.162848	0.166496	0.00257992		-0.203554	-0.391982	0.133239		-0.130854	0.280101
539.565	663.825	87.8647		15411	29251.7	9786.9		3.03867	3.80607	0.542637		22.3053	29.4635	5.06163		1.45484	1.67765	0.157555		5.37194	7.82326	1.73335		0.426963	0.455612	0.0202579		0.386494	0.400112	0.00962943		3.7748	4.71477	0.664659		1.76861	2.0586	0.205055		0.245869	0.0888088	0.111059		-0.0280069	-0.0632056	0.0248893		-0.266064	-0.349881
161.498	281.405	84.7872		13218.2	14245.5	726.402		1.37902	2.07982	0.49554		9.10429	15.3448	4.41271		0.802125	1.07251	0.19119		6.75137	6.97654	0.15922		0.385584	0.284369	0.07157		0.243863	0.268214	0.017219		1.62445	2.51111	0.626969		1.12487	1.4577	0.235345		-0.0246454	0.166132	0.1349		0.129061	0.0845696	0.03146		0.308934	0.128747
1079.59	742.548	238.324		57407.2	34138.4	16453.5		2.71265	3.06562	0.249587		42.5057	27.4802	10.6247		1.51336	1.5458	0.022936		18.5154	10.366	5.76248		0.149371	0.223253	0.0522422		0.171601	0.266103	0.0668232		4.41223	4.54203	0.0917794		2.31323	2.17672	0.0965335		0.0231579	-0.0162931	0.0278961		0.109292	0.48296	0.264223		-0.142833	0.183202
566.308	660.422	66.5486		18715.4	23771.9	3575.52		3.28004	3.67343	0.278171		25.2466	28.1354	2.04271		1.49705	1.64703	0.106054		7.98808	7.4347	0.391297		0.324948	0.337603	0.00894852		0.276489	0.311517	0.0247685		4.26795	4.6762	0.288679		1.92625	2.04052	0.0808037		-0.0486984	-0.0367555	0.00844486		0.385531	0.386766	0.000873356		-0.0118157	0.125814
#N/A	#N/A	#N/A		#N/A	#N/A	#N/A		#N/A	#N/A	#N/A		#N/A	#N/A	#N/A		#N/A	#N/A	#N/A		#N/A	#N/A	#N/A		#N/A	#N/A	#N/A		#N/A	#N/A	#N/A		#N/A	#N/A	#N/A		#N/A	#N/A	#N/A		#N/A	#N/A	#N/A		#N/A	#N/A	#N/A		#N/A	#N/A
#N/A	#N/A	#N/A		#N/A	#N/A	#N/A		#N/A	#N/A	#N/A		#N/A	#N/A	#N/A		#N/A	#N/A	#N/A		#N/A	#N/A	#N/A		#N/A	#N/A	#N/A		#N/A	#N/A	#N/A		#N/A	#N/A	#N/A		#N/A	#N/A	#N/A		#N/A	#N/A	#N/A		#N/A	#N/A	#N/A		#N/A	#N/A
#N/A	#N/A	#N/A		#N/A	#N/A	#N/A		#N/A	#N/A	#N/A		#N/A	#N/A	#N/A		#N/A	#N/A	#N/A		#N/A	#N/A	#N/A		#N/A	#N/A	#N/A		#N/A	#N/A	#N/A		#N/A	#N/A	#N/A		#N/A	#N/A	#N/A		#N/A	#N/A	#N/A		#N/A	#N/A	#N/A		#N/A	#N/A
#N/A	#N/A	#N/A		#N/A	#N/A	#N/A		#N/A	#N/A	#N/A		#N/A	#N/A	#N/A		#N/A	#N/A	#N/A		#N/A	#N/A	#N/A		#N/A	#N/A	#N/A		#N/A	#N/A	#N/A		#N/A	#N/A	#N/A		#N/A	#N/A	#N/A		#N/A	#N/A	#N/A		#N/A	#N/A	#N/A		#N/A	#N/A
#N/A	#N/A	#N/A		#N/A	#N/A	#N/A		#N/A	#N/A	#N/A		#N/A	#N/A	#N/A		#N/A	#N/A	#N/A		#N/A	#N/A	#N/A		#N/A	#N/A	#N/A		#N/A	#N/A	#N/A		#N/A	#N/A	#N/A		#N/A	#N/A	#N/A		#N/A	#N/A	#N/A		#N/A	#N/A	#N/A		#N/A	#N/A
#N/A	#N/A	#N/A		#N/A	#N/A	#N/A		#N/A	#N/A	#N/A		#N/A	#N/A	#N/A		#N/A	#N/A	#N/A		#N/A	#N/A	#N/A		#N/A	#N/A	#N/A		#N/A	#N/A	#N/A		#N/A	#N/A	#N/A		#N/A	#N/A	#N/A		#N/A	#N/A	#N/A		#N/A	#N/A	#N/A		#N/A	#N/A
#N/A	#N/A	#N/A		#N/A	#N/A	#N/A		#N/A	#N/A	#N/A		#N/A	#N/A	#N/A		#N/A	#N/A	#N/A		#N/A	#N/A	#N/A		#N/A	#N/A	#N/A		#N/A	#N/A	#N/A		#N/A	#N/A	#N/A		#N/A	#N/A	#N/A		#N/A	#N/A	#N/A		#N/A	#N/A	#N/A		#N/A	#N/A
#N/A	#N/A	#N/A		#N/A	#N/A	#N/A		#N/A	#N/A	#N/A		#N/A	#N/A	#N/A		#N/A	#N/A	#N/A		#N/A	#N/A	#N/A		#N/A	#N/A	#N/A		#N/A	#N/A	#N/A		#N/A	#N/A	#N/A		#N/A	#N/A	#N/A		#N/A	#N/A	#N/A		#N/A	#N/A	#N/A		#N/A	#N/A
		171.167				7725.78				0.546134				6.42545				0.200816				1.82575				0.063882				0.0538403				0.760182				0.228365				0.152977				0.141283
[truncated: 4 more columns]

## Sheet: WR_RGV_TD
MaxJerk				MaxAnfJerk				MeanAcc				MaxAcc				MeanGyr				MaxGyr				SE_Acc				SE_Gyr				RMS_Acc				RMS_Gyr				CORR_AYZ				CORR_GXY				CORR_GXZ
180.476	156.821	#N/A		6038.86	9440.49	#N/A		2.44506	2.57414	#N/A		8.46574	7.69379	#N/A		1.05398	1.17679	#N/A		4.05115	4.63249	#N/A		0.403159	0.430095	#N/A		0.275832	0.357524	#N/A		2.84537	2.98145	#N/A		1.36107	1.45496	#N/A		0.0322897	-0.0851609	#N/A		0.345255	0.564221	#N/A		-0.100252	0.0763805
161.623	200.94	#N/A		4105.39	4502.71	#N/A		3.03065	3.09988	#N/A		9.57217	10.2789	#N/A		1.2316	1.21442	#N/A		3.85613	5.24065	#N/A		0.407844	0.433645	#N/A		0.300202	0.321959	#N/A		3.56628	3.6249	#N/A		1.559	1.55188	#N/A		0.805529	0.735278	#N/A		-0.362999	-0.422854	#N/A		0.2376	0.226528
213.476	155.311	#N/A		10487.2	9593.49	#N/A		2.80777	2.70969	#N/A		12.7132	9.20421	#N/A		1.29271	1.3189	#N/A		3.64295	3.7848	#N/A		0.361755	0.442745	#N/A		0.353101	0.417932	#N/A		3.46115	3.19449	#N/A		1.58537	1.5829	#N/A		0.734867	0.699106	#N/A		-0.345156	-0.193906	#N/A		-0.210926	-0.26475
270.073	232.391	#N/A		10968.6	10918.4	#N/A		4.1796	4.31953	#N/A		13.6545	14.4783	#N/A		1.49352	1.51533	#N/A		4.5867	6.51537	#N/A		0.437007	0.379582	#N/A		0.379627	0.278951	#N/A		4.8966	5.14244	#N/A		1.84895	1.9914	#N/A		-0.72638	-0.705671	#N/A		0.123624	0.144637	#N/A		-0.0892059	0.0399601
282.544	297.65	#N/A		11767.8	9735.39	#N/A		2.37303	2.68801	#N/A		10.5117	11.4877	#N/A		1.2323	1.52336	#N/A		5.06585	4.72963	#N/A		0.48756	0.521453	#N/A		0.438595	0.456531	#N/A		2.75811	3.10718	#N/A		1.49316	1.80215	#N/A		-0.36294	-0.292225	#N/A		0.364377	0.0648904	#N/A		-0.0207668	-0.253748
197.218	119.518	#N/A		7270.26	5163.88	#N/A		2.40033	2.45922	#N/A		9.66461	7.61155	#N/A		1.06498	1.15581	#N/A		4.36014	4.37227	#N/A		0.473434	0.515997	#N/A		0.358763	0.343211	#N/A		2.81603	2.81252	#N/A		1.32853	1.4187	#N/A		-0.585194	-0.601559	#N/A		0.0913668	0.212096	#N/A		0.11375	0.0281543
352.345	298.726	#N/A		11745.1	7318.66	#N/A		2.46662	2.98114	#N/A		14.1374	13.9785	#N/A		1.20577	1.25114	#N/A		4.34893	4.70609	#N/A		0.444704	0.436081	#N/A		0.370382	0.379997	#N/A		3.02547	3.56118	#N/A		1.46439	1.51893	#N/A		-0.620278	-0.559998	#N/A		0.202307	0.0288375	#N/A		-0.184244	-0.340653
176.574	163.15	#N/A		7697.19	11375.1	#N/A		1.78324	1.77947	#N/A		7.88568	7.17397	#N/A		1.01809	0.99709	#N/A		4.53218	5.80569	#N/A		0.409913	0.299146	#N/A		0.266133	0.192825	#N/A		2.08735	2.12895	#N/A		1.3628	1.40546	#N/A		-0.432717	-0.421988	#N/A		0.25062	0.340474	#N/A		0.384612	0.511128
159.698	147.004	#N/A		5377.42	6167.68	#N/A		1.79063	1.63893	#N/A		8.15109	10.403	#N/A		0.914499	0.737204	#N/A		4.70179	6.82297	#N/A		0.323055	0.206236	#N/A		0.196338	0.139256	#N/A		2.14317	2.03538	#N/A		1.26191	1.10191	#N/A		-0.448176	-0.300059	#N/A		0.453592	0.355656	#N/A		0.536619	0.51338
144.522	85.3952	#N/A		7277.08	5937.5	#N/A		1.6911	1.82085	#N/A		6.99091	5.92218	#N/A		1.0569	1.13668	#N/A		3.70987	3.86068	#N/A		0.422363	0.462682	#N/A		0.254596	0.340119	#N/A		1.97144	2.05528	#N/A		1.37097	1.40018	#N/A		-0.598812	-0.628573	#N/A		0.323278	0.395528	#N/A		0.213756	0.39214
231.458	316.078	#N/A		10935.2	10434.9	#N/A		2.72852	2.96201	#N/A		11.6643	15.1076	#N/A		1.40832	1.47899	#N/A		5.56262	6.4324	#N/A		0.424812	0.39593	#N/A		0.293365	0.309066	#N/A		3.27352	3.5726	#N/A		1.82259	1.91238	#N/A		-0.446902	-0.356254	#N/A		0.731095	0.754913	#N/A		0.634971	0.675939
200.863	189.776	#N/A		10081.1	6034.33	#N/A		2.74907	2.31489	#N/A		10.5792	9.76091	#N/A		1.11876	0.873397	#N/A		4.96863	2.71548	#N/A		0.409325	0.465988	#N/A		0.371545	0.451953	#N/A		3.18242	2.67517	#N/A		1.41003	1.07151	#N/A		0.461951	0.515619	#N/A		-0.527844	-0.222511	#N/A		0.490518	0.0905314
174.176	178.045	#N/A		8306.34	8453.05	#N/A		3.64066	3.44003	#N/A		12.1427	12.0242	#N/A		1.49213	1.35228	#N/A		4.78692	4.34745	#N/A		0.504315	0.437631	#N/A		0.461712	0.391821	#N/A		4.18193	4.00094	#N/A		1.79494	1.63941	#N/A		-0.644138	-0.68748	#N/A		0.325809	0.217974	#N/A		0.208879	0.186676
214.266	211.588	#N/A		6394.52	6255.01	#N/A		2.33086	2.1261	#N/A		10.4125	10.2413	#N/A		1.01973	0.974121	#N/A		4.28652	4.81303	#N/A		0.371982	0.40538	#N/A		0.186325	0.214384	#N/A		2.85629	2.61094	#N/A		1.4399	1.33948	#N/A		-0.636666	-0.455044	#N/A		0.347016	0.341414	#N/A		0.413587	0.451158
166.57	146.239	#N/A		6043.05	5953.14	#N/A		2.23684	2.7654	#N/A		9.34758	9.73832	#N/A		0.944066	1.08088	#N/A		4.07042	4.95756	#N/A		0.392322	0.380559	#N/A		0.29748	0.299797	#N/A		2.61901	3.19578	#N/A		1.24042	1.426	#N/A		-0.572686	-0.542299	#N/A		0.217756	0.292969	#N/A		0.396003	0.50459
143.701	181.858	#N/A		5666.62	7455.61	#N/A		2.26026	2.66289	#N/A		8.47008	10.4597	#N/A		1.14263	1.26524	#N/A		4.53232	5.32596	#N/A		0.380363	0.379093	#N/A		0.193837	0.231506	#N/A		2.76364	3.17006	#N/A		1.56314	1.70415	#N/A		-0.79506	-0.621563	#N/A		0.425763	0.688685	#N/A		0.475756	0.622561
148.721	144.535	#N/A		6609.1	5108.93	#N/A		2.10382	2.00328	#N/A		8.63963	7.16727	#N/A		0.914271	1.05331	#N/A		3.32772	3.80571	#N/A		0.466997	0.464075	#N/A		0.34342	0.308365	#N/A		2.46576	2.35629	#N/A		1.1633	1.36109	#N/A		0.68621	0.686516	#N/A		-0.478035	-0.235848	#N/A		0.383666	0.389339
191.495	178.262	#N/A		4031.07	7013.22	#N/A		2.55794	2.94938	#N/A		10.5768	11.279	#N/A		1.38042	1.42846	#N/A		4.64638	4.96118	#N/A		0.352123	0.396055	#N/A		0.290009	0.343796	#N/A		2.97254	3.40122	#N/A		1.72401	1.75796	#N/A		-0.581404	-0.698388	#N/A		0.301022	0.480015	#N/A		0.725283	0.557501
181.586	189.233	#N/A		4468.71	4438.78	#N/A		2.21276	2.63844	#N/A		8.44961	9.2429	#N/A		0.995301	1.07539	#N/A		4.05337	4.17653	#N/A		0.319363	0.357988	#N/A		0.18236	0.224694	#N/A		2.62063	3.14187	#N/A		1.34869	1.42031	#N/A		-0.592707	-0.658618	#N/A		0.410999	0.245855	#N/A		0.376262	0.16952
193.126	173.373	#N/A		9039.09	6373.42	#N/A		3.50819	3.66194	#N/A		12.8249	10.6278	#N/A		1.54127	1.71599	#N/A		4.8606	5.40748	#N/A		0.444377	0.425124	#N/A		0.348645	0.327733	#N/A		4.12708	4.28001	#N/A		1.9362	2.13536	#N/A		-0.813328	-0.84219	#N/A		0.257363	0.265619	#N/A		0.0104429	-0.238861
#N/A	#N/A	#N/A		#N/A	#N/A	#N/A		#N/A	#N/A	#N/A		#N/A	#N/A	#N/A		#N/A	#N/A	#N/A		#N/A	#N/A	#N/A		#N/A	#N/A	#N/A		#N/A	#N/A	#N/A		#N/A	#N/A	#N/A		#N/A	#N/A	#N/A		#N/A	#N/A	#N/A		#N/A	#N/A	#N/A		#N/A	#N/A
#N/A	#N/A	#N/A		#N/A	#N/A	#N/A		#N/A	#N/A	#N/A		#N/A	#N/A	#N/A		#N/A	#N/A	#N/A		#N/A	#N/A	#N/A		#N/A	#N/A	#N/A		#N/A	#N/A	#N/A		#N/A	#N/A	#N/A		#N/A	#N/A	#N/A		#N/A	#N/A	#N/A		#N/A	#N/A	#N/A		#N/A	#N/A
#N/A	#N/A	#N/A		#N/A	#N/A	#N/A		#N/A	#N/A	#N/A		#N/A	#N/A	#N/A		#N/A	#N/A	#N/A		#N/A	#N/A	#N/A		#N/A	#N/A	#N/A		#N/A	#N/A	#N/A		#N/A	#N/A	#N/A		#N/A	#N/A	#N/A		#N/A	#N/A	#N/A		#N/A	#N/A	#N/A		#N/A	#N/A
#N/A	#N/A	#N/A		#N/A	#N/A	#N/A		#N/A	#N/A	#N/A		#N/A	#N/A	#N/A		#N/A	#N/A	#N/A		#N/A	#N/A	#N/A		#N/A	#N/A	#N/A		#N/A	#N/A	#N/A		#N/A	#N/A	#N/A		#N/A	#N/A	#N/A		#N/A	#N/A	#N/A		#N/A	#N/A	#N/A		#N/A	#N/A
[truncated: 4 more columns]

## Sheet: WR_RS_DCP
MaxJerk				MaxAnfJerk				MeanAcc				MaxAcc				MeanGyr				MaxGyr				SE_Acc				SE_Gyr				RMS_Acc				RMS_Gyr				CORR_AYZ				CORR_GXY				CORR_GXZ
495.052	485.698	6.61441		28961.8	22956.9	4246.05		3.38176	3.6134	0.163794		21.0802	22.1212	0.736088		2.2164	2.39854	0.128796		8.96074	7.75666	0.851413		0.372291	0.361174	0.00786094		0.345931	0.378861	0.0232849		4.27699	4.56726	0.20525		2.6353	2.79137	0.110358		0.242542	0.0379336	0.14468		-0.162004	-0.219597	0.0407239		0.405005	0.494365
613.483	621.907	5.95653		35267.1	28123.5	5051.27		3.71222	3.58813	0.0877393		28.2001	27.9283	0.19219		2.30523	2.21874	0.0611531		9.80129	7.65123	1.52032		0.365923	0.31424	0.0365457		0.374234	0.356075	0.0128401		4.75331	4.69949	0.0380611		2.62617	2.5128	0.0801658		-0.243875	-0.245978	0.00148714		0.305725	0.203064	0.0725922		0.295883	0.209196
333.626	274.991	41.4608		14205.1	12987.3	861.145		3.8317	3.08224	0.529949		20.4642	15.9157	3.21624		2.20567	1.80394	0.284067		5.16253	4.37461	0.557141		0.293526	0.326238	0.0231306		0.253992	0.230585	0.0165508		4.58328	3.69281	0.629661		2.5366	2.11469	0.298339		-0.121522	0.349422	0.333007		-0.736019	-0.693819	0.02984		0.231752	0.423234
412.565	364.749	33.8111		21292.2	17271	2843.44		2.58083	3.72105	0.806255		21.9028	22.6681	0.541205		1.59697	2.26835	0.474734		5.46529	5.56777	0.0724684		0.116458	0.233942	0.0830733		0.149601	0.274368	0.0882241		3.46375	4.95543	1.05478		1.96982	2.59101	0.439246		0.551918	-0.611747	0.822836		0.605483	0.420117	0.131074		-0.349733	0.65558
668.925	602.072	47.2725		28528.6	30244	1212.97		2.7968	4.70801	1.35143		34.6384	34.9814	0.242511		1.63551	2.97281	0.945611		9.53472	9.72822	0.13683		0.16284	0.22382	0.0431192		0.157728	0.24693	0.0630754		4.03768	6.26207	1.57288		2.25268	3.4994	0.881563		0.231984	0.319266	0.0617176		0.465224	0.382283	0.0586481		-0.0918405	-0.00220031
515.82	648.799	94.0304		15266.2	29093	9777.01		2.42382	3.8632	1.01779		22.9114	31.85	6.32059		1.45332	2.11948	0.471046		4.85879	6.0189	0.820326		0.221204	0.204355	0.0119138		0.265623	0.341272	0.0534923		3.27759	5.16777	1.33656		1.74344	2.37078	0.443598		-0.405794	-0.372895	0.0232631		-0.333122	-0.322396	0.00758462		-0.10076	0.0156636
258.229	272.041	9.76653		10225.2	13437.6	2271.53		1.75019	2.40602	0.463741		12.7517	12.0947	0.464597		1.05265	1.52638	0.334979		6.66838	7.4336	0.541093		0.450487	0.382981	0.0477341		0.362225	0.358473	0.00265353		2.13102	2.88109	0.530377		1.32191	1.85332	0.375767		0.0416895	-0.0864335	0.0905967		-0.362561	-0.446635	0.0594487		0.105285	-0.0614655
438.654	876.799	309.815		24390.2	31540.5	5055.97		2.83994	5.14915	1.63286		21.8442	38.5462	11.8101		2.21722	3.14299	0.654623		8.27116	9.028	0.53516		0.252717	0.283738	0.0219357		0.245626	0.329975	0.0596433		3.85852	7.15122	2.32829		2.52595	3.53561	0.713937		-0.0738476	0.223608	0.210333		-0.68423	-0.515993	0.118962		0.18628	0.260885
176.567	292.044	81.6545		9448.17	8378.25	756.545		1.61312	1.78947	0.124696		10.9901	14.9861	2.8256		0.732392	0.910598	0.126011		3.84915	4.03194	0.129251		0.219795	0.230578	0.00762459		0.145344	0.139869	0.00387155		1.95477	2.22632	0.192018		1.03643	1.28414	0.175159		0.34927	0.353807	0.00320818		-0.180277	0.0142821	0.137574		0.0986692	0.121517
1114.32	729.971	271.778		56534.1	32943.7	16680.9		6.08812	4.67917	0.996277		47.193	31.753	10.9177		3.67806	2.99085	0.485927		16.0241	11.6903	3.06449		0.308614	0.455735	0.10403		0.401309	0.464443	0.0446425		8.34521	5.73984	1.84228		4.45799	3.51812	0.66459		0.413657	0.291896	0.0860979		0.0080392	-0.064269	0.0511296		-0.155487	0.123849
430.659	565.12	95.0784		17513.4	24376.2	4852.75		3.47137	4.29151	0.579933		20.6628	23.4728	1.98704		2.17683	2.4888	0.220597		5.86601	7.32018	1.02826		0.516623	0.538689	0.0156032		0.369502	0.388713	0.0135842		4.12419	5.06945	0.668399		2.57386	2.95581	0.270084		0.201504	-0.0358223	0.167815		0.127561	-0.0381983	0.11721		0.389531	0.381055
300.217	350.075	35.2552		19564.8	18265.1	918.995		2.16183	2.51344	0.248621		12.8262	13.9386	0.78661		1.66569	1.85059	0.130744		10.3486	9.12311	0.866543		0.401363	0.32361	0.0549797		0.269949	0.254453	0.0109578		2.60549	3.07322	0.330735		2.14129	2.41081	0.190578		0.209614	0.264449	0.0387746		-0.194618	-0.109446	0.0602256		0.277581	0.225372
1238.92	668.024	403.685		78456.2	55069.8	16536.7		4.24773	2.53856	1.20856		51.807	26.7862	17.6924		2.27857	1.46919	0.572313		14.9839	10.4185	3.22821		0.159088	0.185136	0.0184184		0.228614	0.167754	0.0430349		6.62304	3.54813	2.17429		3.08376	2.09291	0.700636		0.0640383	0.015604	0.0342482		-0.0338274	0.425745	0.324967		-0.261044	-0.0678014
619.581	913.709	207.98		15465.8	33509.4	12758.7		3.89287	5.38917	1.05805		27.5333	41.191	9.65746		2.19884	2.75055	0.390118		6.303	8.73814	1.7219		0.315396	0.241547	0.0522192		0.331811	0.373423	0.0294243		4.862	7.1504	1.61814		2.50144	3.07812	0.407775		0.0050459	-0.222125	0.160634		-0.0697459	0.0150515	0.0599608		-0.0615336	-0.142851
#N/A	#N/A	#N/A		#N/A	#N/A	#N/A		#N/A	#N/A	#N/A		#N/A	#N/A	#N/A		#N/A	#N/A	#N/A		#N/A	#N/A	#N/A		#N/A	#N/A	#N/A		#N/A	#N/A	#N/A		#N/A	#N/A	#N/A		#N/A	#N/A	#N/A		#N/A	#N/A	#N/A		#N/A	#N/A	#N/A		#N/A	#N/A
#N/A	#N/A	#N/A		#N/A	#N/A	#N/A		#N/A	#N/A	#N/A		#N/A	#N/A	#N/A		#N/A	#N/A	#N/A		#N/A	#N/A	#N/A		#N/A	#N/A	#N/A		#N/A	#N/A	#N/A		#N/A	#N/A	#N/A		#N/A	#N/A	#N/A		#N/A	#N/A	#N/A		#N/A	#N/A	#N/A		#N/A	#N/A
#N/A	#N/A	#N/A		#N/A	#N/A	#N/A		#N/A	#N/A	#N/A		#N/A	#N/A	#N/A		#N/A	#N/A	#N/A		#N/A	#N/A	#N/A		#N/A	#N/A	#N/A		#N/A	#N/A	#N/A		#N/A	#N/A	#N/A		#N/A	#N/A	#N/A		#N/A	#N/A	#N/A		#N/A	#N/A	#N/A		#N/A	#N/A
#N/A	#N/A	#N/A		#N/A	#N/A	#N/A		#N/A	#N/A	#N/A		#N/A	#N/A	#N/A		#N/A	#N/A	#N/A		#N/A	#N/A	#N/A		#N/A	#N/A	#N/A		#N/A	#N/A	#N/A		#N/A	#N/A	#N/A		#N/A	#N/A	#N/A		#N/A	#N/A	#N/A		#N/A	#N/A	#N/A		#N/A	#N/A
#N/A	#N/A	#N/A		#N/A	#N/A	#N/A		#N/A	#N/A	#N/A		#N/A	#N/A	#N/A		#N/A	#N/A	#N/A		#N/A	#N/A	#N/A		#N/A	#N/A	#N/A		#N/A	#N/A	#N/A		#N/A	#N/A	#N/A		#N/A	#N/A	#N/A		#N/A	#N/A	#N/A		#N/A	#N/A	#N/A		#N/A	#N/A
#N/A	#N/A	#N/A		#N/A	#N/A	#N/A		#N/A	#N/A	#N/A		#N/A	#N/A	#N/A		#N/A	#N/A	#N/A		#N/A	#N/A	#N/A		#N/A	#N/A	#N/A		#N/A	#N/A	#N/A		#N/A	#N/A	#N/A		#N/A	#N/A	#N/A		#N/A	#N/A	#N/A		#N/A	#N/A	#N/A		#N/A	#N/A
#N/A	#N/A	#N/A		#N/A	#N/A	#N/A		#N/A	#N/A	#N/A		#N/A	#N/A	#N/A		#N/A	#N/A	#N/A		#N/A	#N/A	#N/A		#N/A	#N/A	#N/A		#N/A	#N/A	#N/A		#N/A	#N/A	#N/A		#N/A	#N/A	#N/A		#N/A	#N/A	#N/A		#N/A	#N/A	#N/A		#N/A	#N/A
#N/A	#N/A	#N/A		#N/A	#N/A	#N/A		#N/A	#N/A	#N/A		#N/A	#N/A	#N/A		#N/A	#N/A	#N/A		#N/A	#N/A	#N/A		#N/A	#N/A	#N/A		#N/A	#N/A	#N/A		#N/A	#N/A	#N/A		#N/A	#N/A	#N/A		#N/A	#N/A	#N/A		#N/A	#N/A	#N/A		#N/A	#N/A
#N/A	#N/A	#N/A		#N/A	#N/A	#N/A		#N/A	#N/A	#N/A		#N/A	#N/A	#N/A		#N/A	#N/A	#N/A		#N/A	#N/A	#N/A		#N/A	#N/A	#N/A		#N/A	#N/A	#N/A		#N/A	#N/A	#N/A		#N/A	#N/A	#N/A		#N/A	#N/A	#N/A		#N/A	#N/A	#N/A		#N/A	#N/A
#N/A	#N/A	#N/A		#N/A	#N/A	#N/A		#N/A	#N/A	#N/A		#N/A	#N/A	#N/A		#N/A	#N/A	#N/A		#N/A	#N/A	#N/A		#N/A	#N/A	#N/A		#N/A	#N/A	#N/A		#N/A	#N/A	#N/A		#N/A	#N/A	#N/A		#N/A	#N/A	#N/A		#N/A	#N/A	#N/A		#N/A	#N/A
		170.531				8104.76				0.874042				7.21583				0.445669				1.44482				0.0469096				0.0415753				1.2775				0.475408				0.257703				0.117803
[truncated: 4 more columns]

## Sheet: WR_RS_TD
MaxJerk				MaxAnfJerk				MeanAcc				MaxAcc				MeanGyr				MaxGyr				SE_Acc				SE_Gyr				RMS_Acc				RMS_Gyr				CORR_AYZ				CORR_GXY				CORR_GXZ
203.139	242.657	#N/A		8175.77	8247.65	#N/A		2.7658	2.90509	#N/A		9.05322	9.30408	#N/A		2.08995	2.29961	#N/A		5.1135	5.26278	#N/A		0.461538	0.48621	#N/A		0.233686	0.281128	#N/A		3.21272	3.35982	#N/A		2.51266	2.72118	#N/A		0.68696	0.555309	#N/A		-0.162681	-0.298793	#N/A		0.733196	0.683142
174.417	153.163	#N/A		7030.33	9891.62	#N/A		3.61687	4.2255	#N/A		9.20196	11.085	#N/A		2.23576	2.19888	#N/A		4.7355	4.93346	#N/A		0.482312	0.405501	#N/A		0.225717	0.244089	#N/A		4.05168	4.70922	#N/A		2.64871	2.64405	#N/A		-0.771252	-0.819864	#N/A		0.511017	0.589352	#N/A		0.604913	0.658407
190.332	215.465	#N/A		10710.1	9819.97	#N/A		3.87077	3.73135	#N/A		11.5407	12.3843	#N/A		1.83298	2.07045	#N/A		4.67257	5.64067	#N/A		0.377349	0.423147	#N/A		0.257699	0.250314	#N/A		4.34661	4.19671	#N/A		2.23788	2.55725	#N/A		-0.758273	-0.719015	#N/A		0.164433	0.250153	#N/A		0.183488	0.0123856
404.149	202.574	#N/A		19112.9	11783.6	#N/A		5.63187	4.96739	#N/A		18.5318	15.2752	#N/A		2.95896	2.69533	#N/A		7.61458	7.66979	#N/A		0.504438	0.349709	#N/A		0.356773	0.239846	#N/A		6.38862	5.9349	#N/A		3.44124	3.39097	#N/A		0.545265	0.386163	#N/A		-0.568252	-0.630062	#N/A		0.422923	0.465676
203.314	289.457	#N/A		13400.5	20046.4	#N/A		2.89498	3.52295	#N/A		9.55473	12.0853	#N/A		2.09074	2.81206	#N/A		6.30815	7.82519	#N/A		0.45515	0.50662	#N/A		0.259174	0.317519	#N/A		3.34855	4.03368	#N/A		2.65126	3.40763	#N/A		0.58529	0.461717	#N/A		-0.422762	-0.183074	#N/A		0.230799	0.32456
153.993	223.419	#N/A		5937.83	7852.55	#N/A		2.89405	3.85355	#N/A		9.01283	13.0796	#N/A		1.70013	2.1664	#N/A		4.70309	5.82578	#N/A		0.480998	0.448436	#N/A		0.235628	0.255466	#N/A		3.27973	4.48792	#N/A		2.08016	2.69312	#N/A		0.00463349	0.222741	#N/A		-0.634895	-0.621646	#N/A		0.300688	0.381302
408.451	432.745	#N/A		13001.1	15577	#N/A		2.98094	3.94839	#N/A		17.8675	18.2776	#N/A		2.014	2.35101	#N/A		6.27946	6.78479	#N/A		0.452431	0.482368	#N/A		0.298146	0.313473	#N/A		3.62278	4.59691	#N/A		2.37974	2.74898	#N/A		-0.0335052	0.320753	#N/A		-0.495791	-0.641852	#N/A		0.210313	0.240395
267.01	241.177	#N/A		11236.5	21534.5	#N/A		2.69167	2.27955	#N/A		10.1265	12.353	#N/A		1.65654	1.23742	#N/A		4.98213	6.75111	#N/A		0.462018	0.224306	#N/A		0.304328	0.156506	#N/A		3.09777	2.83407	#N/A		2.02559	1.73921	#N/A		0.516404	0.336109	#N/A		-0.423625	-0.219903	#N/A		0.240165	0.14883
209.099	329.756	#N/A		8832.47	13311.3	#N/A		2.58999	2.19509	#N/A		11.869	14.3156	#N/A		1.27449	0.966854	#N/A		4.56715	5.78539	#N/A		0.309668	0.205155	#N/A		0.216958	0.135483	#N/A		3.06148	2.64825	#N/A		1.6444	1.38028	#N/A		0.595545	0.552781	#N/A		-0.207543	-0.209689	#N/A		0.106337	0.0776116
286.268	280.884	#N/A		11807.3	11180.6	#N/A		4.06705	4.50764	#N/A		14.3897	15.372	#N/A		1.82256	2.09353	#N/A		4.35998	4.11905	#N/A		0.322209	0.367153	#N/A		0.296345	0.337709	#N/A		4.527	4.9384	#N/A		2.13183	2.33785	#N/A		0.624992	0.636044	#N/A		0.0775136	-0.425341	#N/A		-0.0866266	0.334027
232.89	127.44	#N/A		8488.68	5755.27	#N/A		3.33416	2.89954	#N/A		11.9042	8.43022	#N/A		1.89522	1.91119	#N/A		5.12562	4.37186	#N/A		0.308301	0.492279	#N/A		0.220358	0.312198	#N/A		3.80971	3.2252	#N/A		2.34144	2.19719	#N/A		-0.617438	-0.614899	#N/A		0.556971	0.579769	#N/A		0.594621	0.644316
298.784	238.726	#N/A		14803.3	15931.5	#N/A		5.28708	5.71923	#N/A		15.0365	17.4628	#N/A		2.68176	2.57122	#N/A		5.36054	5.60926	#N/A		0.404377	0.370708	#N/A		0.329146	0.324611	#N/A		5.80018	6.27493	#N/A		2.96632	2.90319	#N/A		0.7118	0.665712	#N/A		-0.380166	-0.327718	#N/A		0.438198	0.577035
180.035	162.409	#N/A		7833.54	6794.52	#N/A		2.86514	3.09257	#N/A		9.39281	9.56215	#N/A		1.79379	1.87306	#N/A		4.23175	4.98751	#N/A		0.433037	0.490675	#N/A		0.216169	0.234793	#N/A		3.3248	3.50424	#N/A		2.2085	2.26048	#N/A		0.605118	0.353815	#N/A		-0.493137	-0.51422	#N/A		0.442856	0.427202
158.724	150.63	#N/A		7420.47	7863.32	#N/A		3.0636	3.79699	#N/A		9.14142	11.3141	#N/A		1.85533	2.17949	#N/A		5.09726	6.17086	#N/A		0.381911	0.4608	#N/A		0.194106	0.236201	#N/A		3.50927	4.29315	#N/A		2.36788	2.68867	#N/A		0.574726	0.717832	#N/A		-0.524215	-0.430008	#N/A		0.441767	0.430309
129.838	143.202	#N/A		4221	5342.6	#N/A		2.98807	3.45773	#N/A		8.39903	10.09	#N/A		1.94475	2.02966	#N/A		5.61643	5.52512	#N/A		0.405022	0.439033	#N/A		0.1621	0.197774	#N/A		3.43039	3.99276	#N/A		2.4734	2.55731	#N/A		0.627053	0.764014	#N/A		-0.319729	-0.19866	#N/A		0.456564	0.503102
149.081	178.402	#N/A		5560.23	7085.98	#N/A		3.16742	3.46107	#N/A		8.39081	10.9888	#N/A		1.57873	1.72039	#N/A		3.79901	3.70363	#N/A		0.457573	0.428561	#N/A		0.306181	0.349444	#N/A		3.41698	3.79136	#N/A		1.81488	1.94247	#N/A		0.691532	0.721804	#N/A		-0.0821131	-0.451884	#N/A		0.0330842	0.312268
182.962	166.466	#N/A		3855.48	5106.47	#N/A		2.35221	2.50594	#N/A		9.11947	8.46047	#N/A		1.24379	1.45278	#N/A		3.28199	3.91105	#N/A		0.415898	0.42067	#N/A		0.176105	0.184171	#N/A		2.64144	2.84274	#N/A		1.52828	1.80572	#N/A		0.765017	0.732934	#N/A		-0.66483	-0.729028	#N/A		0.567085	0.334617
196.509	188.951	#N/A		9344.95	6762.26	#N/A		3.84714	4.55706	#N/A		9.39068	10.9748	#N/A		2.38331	2.54902	#N/A		5.88862	6.02254	#N/A		0.567455	0.510569	#N/A		0.342027	0.372095	#N/A		4.26208	4.99203	#N/A		2.85549	2.96937	#N/A		0.708325	0.510035	#N/A		-0.665543	-0.785102	#N/A		0.527871	0.392673
#N/A	#N/A	#N/A		#N/A	#N/A	#N/A		#N/A	#N/A	#N/A		#N/A	#N/A	#N/A		#N/A	#N/A	#N/A		#N/A	#N/A	#N/A		#N/A	#N/A	#N/A		#N/A	#N/A	#N/A		#N/A	#N/A	#N/A		#N/A	#N/A	#N/A		#N/A	#N/A	#N/A		#N/A	#N/A	#N/A		#N/A	#N/A
#N/A	#N/A	#N/A		#N/A	#N/A	#N/A		#N/A	#N/A	#N/A		#N/A	#N/A	#N/A		#N/A	#N/A	#N/A		#N/A	#N/A	#N/A		#N/A	#N/A	#N/A		#N/A	#N/A	#N/A		#N/A	#N/A	#N/A		#N/A	#N/A	#N/A		#N/A	#N/A	#N/A		#N/A	#N/A	#N/A		#N/A	#N/A
#N/A	#N/A	#N/A		#N/A	#N/A	#N/A		#N/A	#N/A	#N/A		#N/A	#N/A	#N/A		#N/A	#N/A	#N/A		#N/A	#N/A	#N/A		#N/A	#N/A	#N/A		#N/A	#N/A	#N/A		#N/A	#N/A	#N/A		#N/A	#N/A	#N/A		#N/A	#N/A	#N/A		#N/A	#N/A	#N/A		#N/A	#N/A
#N/A	#N/A	#N/A		#N/A	#N/A	#N/A		#N/A	#N/A	#N/A		#N/A	#N/A	#N/A		#N/A	#N/A	#N/A		#N/A	#N/A	#N/A		#N/A	#N/A	#N/A		#N/A	#N/A	#N/A		#N/A	#N/A	#N/A		#N/A	#N/A	#N/A		#N/A	#N/A	#N/A		#N/A	#N/A	#N/A		#N/A	#N/A
#N/A	#N/A	#N/A		#N/A	#N/A	#N/A		#N/A	#N/A	#N/A		#N/A	#N/A	#N/A		#N/A	#N/A	#N/A		#N/A	#N/A	#N/A		#N/A	#N/A	#N/A		#N/A	#N/A	#N/A		#N/A	#N/A	#N/A		#N/A	#N/A	#N/A		#N/A	#N/A	#N/A		#N/A	#N/A	#N/A		#N/A	#N/A
#N/A	#N/A	#N/A		#N/A	#N/A	#N/A		#N/A	#N/A	#N/A		#N/A	#N/A	#N/A		#N/A	#N/A	#N/A		#N/A	#N/A	#N/A		#N/A	#N/A	#N/A		#N/A	#N/A	#N/A		#N/A	#N/A	#N/A		#N/A	#N/A	#N/A		#N/A	#N/A	#N/A		#N/A	#N/A	#N/A		#N/A	#N/A
[truncated: 4 more columns]
