# Supplementary material for: Reliability and Discriminative Validity of Wearable Sensors for the Quantification of Upper Limb Movement Disorders in Individuals with Dyskinetic Cerebral Palsy
Source: Sensors (Basel). 2023 Feb 1;23(3):1574. doi: 10.3390/s23031574 (PMC9921560; doi:10.3390/s23031574)
Supplement: Supplementary file 1 [file sensors-23-01574-s001.zip › sensor_parameters_TRT_short_hand_RF.xls]

## Sheet: MaxJerk
90.2366	70.1746
44.5348	50.0313
44.4731	59.2768
52.1588	36.8853
45.1106	48.0198
61.9482	89.8743
90.162	86.7953
65.4557	66.3088
64.1004	87.1067
46.6286	46.7348
75.9212	83.3083
39.6177	37.4179
0.134627	0.211704
87.2995	82.7198
0.18691	0.175331
0.137738	0.150513
97.8865	96.0618

## Sheet: MaxAnfJerk
107253	216163
176443	218900
320667	246340
260208	75652.7
149624	102776
221247	204747
252095	134427
156448	109924
63221.2	134146
87708.4	141728
191267	291564
99085.8	51386.6
11.5321	11.861
169701	290496
12.7087	11.4883
10.4084	13.0975
55476.9	104688

## Sheet: MeanAcc
2.50172	3.13767
3.11329	3.57932
3.40462	3.80858
4.61094	3.02951
2.68219	3.27627
2.93549	4.45241
4.21856	5.47319
2.34681	3.23744
2.37004	3.63536
2.09417	2.48632
3.80103	4.73985
1.73469	1.47612
0.113729	0.113229
3.70582	4.78371
0.0412622	0.0413334
0.0444959	0.0457403
5.58782	5.25636

## Sheet: MaxAcc
6.67682	6.30319
6.6936	9.03335
7.72928	9.70778
9.51445	5.76344
12.0757	11.8758
6.87841	9.16314
9.5567	9.52272
5.68629	6.64072
5.15898	8.56728
5.25955	6.15565
12.5225	10.7178
4.00477	3.89468
0.120644	0.122644
7.88135	9.15762
0.0506033	0.0511948
0.0513057	0.0551271
10.2143	8.69232

## Sheet: MeanGyr
151.719	160.279
123.747	133.512
120.403	120.679
119.825	81.7349
73.4241	92.1726
123.317	112.881
113.336	161.539
117.193	132.608
73.1456	97.5877
59.0795	78.5716
109.716	149.234
72.5923	62.8485
0.530715	0.530758
149.768	175.041
0.547822	0.545163
0.523517	0.52577
148.943	173.686

## Sheet: MaxGyr
377.665	376.231
237.083	283.494
239.858	228.555
228.628	168.925
137.729	165.417
330.39	275.351
289.174	336.618
259.098	238.588
137.467	191.767
137.552	186.058
199.755	286.453
171.925	143.392
0.55284	0.554353
303.869	332.399
0.582119	0.569372
0.546519	0.551354
280.097	346.433

## Sheet: RMSAcc
2.91443	3.44868
3.37946	3.84229
3.63616	4.12951
4.89418	3.21052
3.28595	3.79304
3.45793	4.98325
4.96488	5.93622
2.72274	3.55457
2.59872	3.96043
2.39944	2.88785
4.54103	5.23422
1.9688	1.70658
0.113793	0.113348
4.19933	5.31313
0.0415248	0.0416585
0.0446786	0.0460109
6.12576	5.57999

## Sheet: RMSGyr
178.367	185.914
134.088	148.906
131.154	131.606
135.544	93.7236
83.6156	101.406
146.705	133.486
133.728	180.403
130.71	139.537
80.7297	106.163
68.5345	88.9479
119.948	165.308
85.478	73.904
0.530875	0.530927
169.335	195.322
0.548006	0.545333
0.523677	0.52597
165.312	190.739

## Sheet: SE_Acc
0.398062	0.464455
0.390733	0.368587
0.414204	0.363177
0.424793	0.455999
0.292495	0.297396
0.291545	0.393197
0.355171	0.347569
0.463121	0.505587
0.307448	0.331912
0.399711	0.293053
0.234191	0.393479
0.403829	0.405647
0.406225	0.452786
0.381354	0.418734
0.457939	0.446001
0.420231	0.44833
0.297021	0.341272

## Sheet: SE_Gyr
0.248226	0.350016
0.441332	0.374865
0.390014	0.448794
0.425468	0.36265
0.328925	0.355338
0.342987	0.364433
0.347185	0.361907
0.441985	0.486515
0.348133	0.390339
0.319942	0.362002
0.446184	0.404843
0.289189	0.264162
0.425897	0.459938
0.328219	0.428878
0.471107	0.456264
0.365553	0.416502
0.260855	0.242042
