# Supplementary material for: Reliability and Discriminative Validity of Wearable Sensors for the Quantification of Upper Limb Movement Disorders in Individuals with Dyskinetic Cerebral Palsy
Source: Sensors (Basel). 2023 Feb 1;23(3):1574. doi: 10.3390/s23031574 (PMC9921560; doi:10.3390/s23031574)
Supplement: Supplementary file 1 [file sensors-23-01574-s001.zip › sensor_parameters_TRT_short_hand_RGV.xls]

## Sheet: MaxJerk
50.9365	59.1016
45.8237	66.389
47.9019	56.5023
49.8431	40.1323
34.6817	63.8801
44.9892	58.5105
70.407	83.5964
79.5854	76.4183
50.4725	55.012
43.662	67.2091
48.9343	40.8058
0.158523	0.18383
91.7503	78.5652
0.183739	0.168067
0.170028	0.0943504
74.8378	98.6113

## Sheet: MaxAnfJerk
105762	141558
150643	266878
169166	252818
126809	155538
75807	98311.4
200967	145938
124777	198071
161430	138165
125526	155560
219640	354875
96558.2	85446
13.2646	15.5328
182609	269246
15.4191	12.2339
13.9848	7.26314
83312.5	57566.8

## Sheet: MeanAcc
2.70997	2.46438
2.53172	3.30478
3.10431	2.91205
3.20109	3.03611
2.13981	3.23068
2.00829	2.93638
2.93486	4.17854
2.39631	3.20075
1.98995	3.65179
2.87191	4.38647
1.49222	1.52787
0.115003	0.112993
3.30948	3.5601
0.0406822	0.0421789
0.0464083	0.0263323
4.20182	5.01932

## Sheet: MaxAcc
5.74397	5.76261
6.55103	11.4409
6.62762	6.65061
9.68946	14.5447
7.71833	8.20535
5.86278	7.31182
6.60582	8.69579
7.03518	7.00964
5.53503	8.67414
7.16573	12.8177
4.95761	4.21408
0.124008	0.122212
7.9659	7.65401
0.0510156	0.0528254
0.0552808	0.0319333
9.89616	10.6647

## Sheet: MeanGyr
156.682	124.276
108.728	123.235
112.117	100.358
91.7321	81.1632
83.546	104.302
97.4522	109.11
106.339	135.778
98.489	126.991
76.9632	113.755
136.025	167.818
75.9352	72.9291
0.531695	0.52968
122.011	142.4
0.548095	0.545045
0.521222	0.300039
129.498	151.091

## Sheet: MaxGyr
332.32	332.312
283.949	308.208
256.893	198.085
176.057	190.187
159.988	189.512
283.605	250.744
280.469	322.686
292.426	267.554
194.065	227.727
280.103	302.386
238.034	178.451
0.561887	0.55886
272.833	302.755
0.586788	0.574021
0.549464	0.317016
334.942	347.713

## Sheet: RMSAcc
3.02117	2.78149
2.88489	3.90779
3.41845	3.15302
3.66765	3.73224
2.47481	3.60417
2.52013	3.56806
3.42373	4.76818
2.91288	3.61472
2.26107	3.99051
3.16476	5.21533
1.91506	1.80639
0.115088	0.1131
3.78516	4.00471
0.0409544	0.0424784
0.0466125	0.0265108
5.20663	5.88144

## Sheet: RMSGyr
178.139	150.609
130.458	146.781
130.202	111.277
99.7084	88.4456
95.0717	118.234
116.903	125.507
128.413	158.648
118.531	142.065
89.9028	127.141
155.157	183.332
99.1455	85.1064
0.531924	0.5299
143.883	166.275
0.548317	0.545208
0.521395	0.300128
157.554	175.311

## Sheet: SE_Acc
0.396356	0.319506
0.336779	0.397953
0.417417	0.405261
0.396485	0.310818
0.403341	0.43629
0.317429	0.335952
0.352577	0.340605
0.369924	0.461953
0.450134	0.450598
0.387827	0.369846
0.264107	0.421499
0.490694	0.448439
0.36648	0.450224
0.492277	0.440648
0.482834	0.233245
0.221732	0.272099

## Sheet: SE_Gyr
0.353762	0.265365
0.323066	0.340624
0.34583	0.364419
0.359794	0.402151
0.332211	0.32434
0.309766	0.304854
0.310704	0.3372
0.290505	0.39939
0.312131	0.354788
0.354499	0.414934
0.164248	0.350121
0.486077	0.431013
0.336069	0.364058
0.458296	0.441267
0.454414	0.265471
0.223476	0.211999
