# Supplementary material for: Reliability and Discriminative Validity of Wearable Sensors for the Quantification of Upper Limb Movement Disorders in Individuals with Dyskinetic Cerebral Palsy
Source: Sensors (Basel). 2023 Feb 1;23(3):1574. doi: 10.3390/s23031574 (PMC9921560; doi:10.3390/s23031574)
Supplement: Supplementary file 1 [file sensors-23-01574-s001.zip › sensor_parameters_TRT_short_hand_RS.xls]

## Sheet: MaxJerk
54.5015	57.9267
50.2753	65.5648
71.1498	79.2496
47.1591	62.1521
48.2942	47.5893
97.8817	150.787
74.8293	84.7367
113.141	100.673
71.313	79.81
35.3483	39.0064
59.5751	78.6576
47.3495	52.1425
0.159822	0.154986
92.8863	79.8225
0.187824	0.169877
0.17447	0.103378
86.4189	140.888

## Sheet: MaxAnfJerk
91835	84091.7
270449	184250
195810	161801
124629	63997.7
149179	179909
81861.9	215539
65661.4	105087
206502	171366
39328.7	171741
133325	98438.9
218086	248410
57719.3	52290.7
11.5139	10.736
169462	249973
17.5447	13.4336
11.3894	9.22761
153075	81639

## Sheet: MeanAcc
2.43141	2.57386
3.09867	3.87551
4.04128	4.09215
4.39018	3.9796
3.99626	5.68965
6.29092	9.36229
2.4341	5.71241
3.89863	4.29804
2.74631	5.24096
1.51579	2.55237
4.0594	6.17964
1.72287	1.9612
0.11492	0.113261
4.43479	5.22733
0.0398447	0.0411422
0.0465884	0.0326458
4.63101	6.37046

## Sheet: MaxAcc
5.56154	5.92172
6.01902	8.151
9.58203	9.89225
9.18984	7.11605
9.57304	13.5967
11.0062	15.4324
9.51142	10.6541
9.74877	8.82102
6.46593	14.173
4.3632	5.10199
9.38824	15.5165
4.23593	5.26665
0.125241	0.122614
9.45377	9.61808
0.0501858	0.0504728
0.0556404	0.0385819
8.78662	12.486

## Sheet: MeanGyr
130.948	132.263
140.487	158.425
151.943	147.557
127.332	126.052
125.979	150.514
155.039	228.449
82.5659	198.106
146.719	173.76
108.255	153.506
67.5607	106.405
168.735	202.494
73.7912	85.3704
0.533206	0.536812
187.766	209.649
0.549822	0.544659
0.518851	0.37638
158.644	200.128

## Sheet: MaxGyr
318.416	277.73
266.198	312.265
245.053	249.873
238.773	205.635
186.961	251.336
292.119	391.713
257.923	450.134
332.271	341.094
218.63	282.259
186.645	214.907
289.232	360.861
164.819	178.616
0.55779	0.564073
399.227	486.282
0.590321	0.574399
0.54654	0.39461
301.199	355.845

## Sheet: RMSAcc
2.77396	2.93487
3.32104	4.15648
4.33967	4.40832
4.57984	4.10275
4.20579	6.01955
6.90777	9.8413
3.47764	6.18496
4.60467	4.76375
3.07396	5.71618
1.76885	2.76247
4.40699	6.98749
1.97853	2.2518
0.115043	0.113344
5.05812	5.8203
0.0401311	0.0413893
0.0467978	0.0328089
4.98528	6.71453

## Sheet: RMSGyr
150.909	148.525
153.964	174.401
160.792	159.442
142.874	135.898
134.131	165.998
176.586	248.34
101.387	221.165
167.633	191.747
121.347	165.73
77.6868	115.579
184.863	222.982
83.8989	96.589
0.533388	0.536987
221.578	246.339
0.550081	0.54484
0.519043	0.376537
174.956	217.197

## Sheet: SE_Acc
0.361642	0.387297
0.391528	0.317778
0.314272	0.332926
0.307946	0.254263
0.246676	0.370146
0.312244	0.312042
0.160133	0.378607
0.39113	0.414218
0.326483	0.254084
0.303363	0.332067
0.304957	0.268989
0.415679	0.407098
0.415464	0.422873
0.346056	0.395275
0.476115	0.45387
0.454241	0.303743
0.287188	0.345494

## Sheet: SE_Gyr
0.279477	0.297498
0.395088	0.381157
0.40603	0.342261
0.324845	0.25521
0.223643	0.298544
0.201339	0.389147
0.200232	0.268976
0.399065	0.44653
0.262638	0.334584
0.333847	0.358282
0.359083	0.311862
0.269305	0.229494
0.458339	0.389387
0.247262	0.323626
0.439334	0.403068
0.448155	0.343905
0.266939	0.336511
