# Supplementary material for: Reliability and Discriminative Validity of Wearable Sensors for the Quantification of Upper Limb Movement Disorders in Individuals with Dyskinetic Cerebral Palsy
Source: Sensors (Basel). 2023 Feb 1;23(3):1574. doi: 10.3390/s23031574 (PMC9921560; doi:10.3390/s23031574)
Supplement: Supplementary file 1 [file sensors-23-01574-s001.zip › sensor_parameters_TRT_short_upperarm_RF.xls]

## Sheet: MaxJerk
38.1806	26.3378
33.8924	44.5865
33.9215	29.5403
36.0996	22.6257
25.6106	26.4412
29.7978	59.7191
47.9323	56.0004
48.2256	39.0678
27.7423	36.8111
25.661	15.5218
22.6094	29.8827
22.5355	15.7921
67.862	58.0206
36.2258	47.4441
20.4851	23.4925
120.484	66.6017
41.1898	58.24

## Sheet: MaxAnfJerk
28667.6	31505.9
68452.4	109645
192276	136791
82794.2	45486
63276.5	63343.9
54039	142963
201092	36790.6
96779.5	62454
31583.5	71948.4
61260	40206.3
49700.8	47817.4
32436.4	25190.8
69346.4	115840
79425.9	61883.8
30588.6	33210.3
272760	200242
70770	103871

## Sheet: MeanAcc
1.41467	1.66352
1.28386	1.63589
1.5275	1.6488
2.38491	1.38791
1.15903	1.37305
1.2966	1.90657
1.93147	2.20211
1.32339	1.67064
1.34559	1.53309
1.20286	1.1514
1.32859	1.77303
0.79422	0.950469
2.44258	2.16936
1.80084	1.99163
1.19	1.07252
2.8562	2.48928
2.13229	1.86696

## Sheet: MaxAcc
3.81907	3.49056
2.48262	3.94022
3.52244	3.50703
3.9298	2.37085
2.99364	3.53211
2.77518	4.34714
4.29504	5.388
3.65693	3.17914
3.34761	3.83133
3.0744	2.42903
2.14332	3.79029
1.79871	1.81555
5.51926	5.08592
4.32955	4.83176
2.47205	2.33734
7.51722	6.09221
4.22447	4.90957

## Sheet: MeanGyr
69.9406	77.0455
69.8137	84.0211
77.8732	87.345
103.093	77.8078
61.3204	68.6931
69.8814	78.2429
85.2727	114.181
67.6838	89.7186
59.5978	70.1014
49.6304	50.9155
94.8977	111.563
43.3334	41.3274
138.751	126.566
89.9305	100.382
43.7833	60.1869
147.495	138.267
102.679	95.5508

## Sheet: MaxGyr
145.924	139.733
122.335	131.992
126.832	140.112
185.061	146.935
106.99	104.034
187.469	161.208
220.31	206.075
124.148	157.01
94.4344	113.316
111.821	107.789
159.518	193.103
89.7656	90.5474
211.93	198.408
162.785	181.735
100.316	114.892
229.504	217.512
193.98	187.298

## Sheet: RMSAcc
1.59789	1.87077
1.38581	1.83862
1.70978	1.82598
2.5457	1.48198
1.31175	1.57323
1.43458	2.10249
2.15737	2.4257
1.47843	1.79188
1.47379	1.72538
1.37099	1.26323
1.40182	1.95282
0.86868	1.00859
2.69862	2.40247
2.05163	2.28575
1.28673	1.17378
3.26824	2.85043
2.34363	2.09292

## Sheet: RMSGyr
80.3954	85.8605
77.3107	89.8212
84.1192	94.3857
116.941	91.0143
68.7486	73.8916
88.3023	89.6221
103.522	124.682
75.1306	99.0359
63.7546	75.2859
57.3576	59.0798
103.989	124.095
50.0966	47.9619
144.126	134.222
101.304	113.506
51.5304	67.0389
153.277	147.775
115.273	109.211

## Sheet: SE_Acc
0.38955	0.367046
0.458915	0.397618
0.328412	0.359076
0.380838	0.431867
0.279593	0.284897
0.461762	0.488201
0.459993	0.449207
0.505007	0.423033
0.237735	0.359727
0.367737	0.349235
0.404076	0.407978
0.480161	0.422927
0.338989	0.375202
0.359468	0.313224
0.367713	0.445357
0.35228	0.341951
0.445146	0.389418

## Sheet: SE_Gyr
0.236972	0.246353
0.304037	0.321366
0.263795	0.374704
0.248103	0.21466
0.218158	0.234816
0.18329	0.343196
0.271155	0.336405
0.303122	0.257964
0.184091	0.244387
0.253608	0.242986
0.249564	0.249616
0.231146	0.210607
0.290187	0.288628
0.26662	0.235764
0.232893	0.265013
0.427342	0.259388
0.240027	0.233481
