# Supplementary material for: Reliability and Discriminative Validity of Wearable Sensors for the Quantification of Upper Limb Movement Disorders in Individuals with Dyskinetic Cerebral Palsy
Source: Sensors (Basel). 2023 Feb 1;23(3):1574. doi: 10.3390/s23031574 (PMC9921560; doi:10.3390/s23031574)
Supplement: Supplementary file 1 [file sensors-23-01574-s001.zip › sensor_parameters_TRT_short_upperarm_RGV.xls]

## Sheet: MaxJerk
26.8669	27.3905
34.5719	42.1702
40.372	30.4103
37.0873	35.1531
26.3883	32.0887
23.6902	44.1118
30.0439	40.3666
34.2886	40.6714
19.7489	25.6695
23.9048	44.6094
22.3213	22.4914
48.6993	38.312
33.4792	36.911
25.2622	30.7623
57.8861	27.6182
55.1935	49.6948

## Sheet: MaxAnfJerk
22560.6	19585.4
80591.7	163304
196604	118159
91167.6	118518
74342.2	66488.2
30209.6	53309.7
70560.3	73772.9
55568.8	72904.4
124249	43476.1
55597.9	83268.8
31603.6	27316.3
68308.3	79338
66441.7	69701.9
57792.7	77687.4
214692	72464.6
166038	77706.5

## Sheet: MeanAcc
1.23538	1.57114
1.44406	1.85744
1.61147	1.31157
1.71841	1.62606
1.08827	1.60398
0.887889	1.1802
1.53969	1.82041
1.1218	1.84305
1.35735	1.52757
1.36765	1.94366
0.679973	0.863025
1.54815	1.42189
1.47113	1.59221
1.1435	1.30601
1.79211	1.02191
1.89971	1.73012

## Sheet: MaxAcc
3.14104	3.61766
2.97604	4.5975
3.41272	3.25211
4.33329	5.86946
2.31409	3.21943
2.09446	3.23331
3.63529	4.10295
3.25346	3.83454
3.00769	3.19409
2.65488	4.23943
1.79725	2.08033
4.06259	3.28044
3.1582	3.4206
2.57866	2.9138
4.87566	2.22435
5.18554	3.87229

## Sheet: MeanGyr
70.8796	68.5651
69.3614	85.2555
80.2658	69.8745
72.6006	70.955
53.6713	71.5934
46.4062	58.0325
70.639	87.0016
62.8673	80.7731
53.1128	70.8146
88.2	110.235
35.9997	33.9729
81.995	76.4517
76.7033	83.7295
44.1365	61.4427
88.2249	61.2985
79.5055	79.0578

## Sheet: MaxGyr
131.161	135.006
141.466	153.656
155.228	124.035
134.594	132.673
100.591	124.761
147.96	157.524
179.023	169.296
161.038	170.173
132.765	129.859
170.253	195.257
104.399	87.9386
142.257	151.644
153.898	165.184
106.713	124.477
207.452	112.62
206.757	203.954

## Sheet: RMSAcc
1.39141	1.77125
1.55337	2.08099
1.75529	1.4822
1.92135	1.96726
1.19793	1.73982
1.0058	1.37152
1.74892	2.06183
1.32885	2.0516
1.47663	1.68357
1.48158	2.19385
0.786811	0.950127
1.75634	1.58271
1.61285	1.81151
1.24993	1.44541
2.12335	1.13476
2.25276	1.93578

## Sheet: RMSGyr
78.9906	78.4193
79.8601	95.6939
89.6101	76.5994
83.8691	81.6784
60.6805	81.3374
60.7992	73.053
87.9796	98.1317
79.0571	94.2594
62.1519	77.8618
104.555	124.996
47.8247	42.0733
89.5216	85.9083
90.0911	95.2773
53.04	73.2315
99.9958	69.1194
98.4867	97.6191

## Sheet: SE_Acc
0.419385	0.295793
0.521611	0.398001
0.464981	0.375698
0.378754	0.363279
0.409765	0.377482
0.518508	0.476606
0.391957	0.431779
0.380221	0.450778
0.415621	0.341166
0.447871	0.358508
0.387458	0.440501
0.431142	0.454101
0.347233	0.414718
0.424361	0.340305
0.456641	0.31455
0.43716	0.467575

## Sheet: SE_Gyr
0.225477	0.209752
0.300545	0.344164
0.353956	0.283623
0.245191	0.220228
0.303986	0.224735
0.158515	0.216722
0.258707	0.263734
0.161697	0.274877
0.261422	0.250539
0.219554	0.273306
0.123225	0.224633
0.265824	0.290222
0.23134	0.293803
0.226639	0.198164
0.343416	0.191824
0.255604	0.179044
