# Supplementary material for: Reliability and Discriminative Validity of Wearable Sensors for the Quantification of Upper Limb Movement Disorders in Individuals with Dyskinetic Cerebral Palsy
Source: Sensors (Basel). 2023 Feb 1;23(3):1574. doi: 10.3390/s23031574 (PMC9921560; doi:10.3390/s23031574)
Supplement: Supplementary file 1 [file sensors-23-01574-s001.zip › sensor_parameters_TRT_short_upperarm_RS.xls]

## Sheet: MaxJerk
18.5265	20.6621
35.6518	40.0285
50.7158	55.1425
26.1869	19.2294
20.8977	21.2948
42.7193	85.66
29.049	37.183
54.4293	42.1244
22.0276	35.1434
21.9273	23.3203
23.785	43.0058
18.2104	26.7438
72.5093	46.4668
36.2131	38.332
31.0192	34.5747
101.457	58.1533
49.4265	85.3146

## Sheet: MaxAnfJerk
22797.8	22566.6
97715.4	142425
233291	183888
36497.3	24623.8
40658.7	78575.4
65994.3	172172
28751.6	94181.5
94618.3	73231.8
29709.1	86639.6
53621.5	53273.8
69444.8	134773
30344.9	32773.2
174513	121363
125599	116105
57884.9	60095.9
312640	152083
92585.3	187724

## Sheet: MeanAcc
1.29913	1.47263
1.31764	1.59328
1.7387	1.82368
1.50309	1.23129
1.27868	2.03723
2.28385	3.28404
1.41075	1.90221
1.88661	2.1575
1.36259	1.69772
0.960433	1.14352
1.21028	1.8675
0.943821	1.3709
2.8907	1.95028
1.51898	1.72604
1.54367	1.57152
2.75898	1.85527
1.86894	2.43045

## Sheet: MaxAcc
2.57576	2.62375
3.04202	3.98448
4.67564	5.26212
2.76387	1.95644
4.20016	5.9469
4.62374	7.64687
3.74202	5.52504
4.49539	4.00002
2.66452	4.29
2.20012	2.55346
2.82971	5.14177
2.31932	2.60649
5.57266	3.94122
3.39974	3.68999
3.12783	3.22555
7.18379	3.95132
4.79094	6.24085

## Sheet: MeanGyr
68.0353	64.0642
74.3988	91.6374
94.6466	101.504
103.103	95.5934
79.8983	105.988
108.766	143.058
61.419	115.47
86.2486	104.495
71.6711	102.098
46.0749	72.8625
89.7928	95.1615
48.1215	57.0978
147.828	106.159
67.0363	87.5801
72.425	89.3471
126.174	105.282
94.275	114.539

## Sheet: MaxGyr
160.999	149.683
144.529	156.711
165.019	173.343
198.721	170.95
142.113	181.189
233.12	243.453
197.12	262.728
183.542	219.896
150.459	186.12
108.524	125.162
184.715	183.516
123.595	115.055
263.426	203.575
130.377	177.951
180.718	212.933
254.808	214.046
203.086	221.457

## Sheet: RMSAcc
1.42395	1.59697
1.46717	1.79937
2.04057	2.16548
1.60324	1.29692
1.5577	2.30473
2.50554	3.58652
1.60403	2.16235
2.12281	2.34522
1.48891	1.91495
1.05108	1.29162
1.35291	2.20721
1.05272	1.44104
3.09398	2.09408
1.69771	1.92455
1.66491	1.73976
3.18773	2.04216
2.09103	2.75808

## Sheet: RMSGyr
82.9825	76.9575
82.2686	98.9279
102.306	109.548
119.177	108.571
89.0424	117.819
126.702	154.757
78.6221	132.099
99.1935	119.02
83.6723	112.168
53.1415	78.9677
104.041	108.043
58.9686	65.7639
163.406	119.214
74.7695	99.6077
87.141	105.007
140.402	117.058
107.585	126.964

## Sheet: SE_Acc
0.336902	0.391217
0.500831	0.396824
0.330384	0.302998
0.3999	0.400958
0.224302	0.277572
0.436082	0.416864
0.314748	0.459464
0.431994	0.507796
0.34428	0.31206
0.300619	0.360035
0.45533	0.332402
0.360741	0.386167
0.543459	0.50418
0.391593	0.39183
0.465285	0.387044
0.509093	0.386727
0.413759	0.432544

## Sheet: SE_Gyr
0.149889	0.197136
0.359319	0.348773
0.403468	0.418177
0.197691	0.171591
0.250042	0.256212
0.275434	0.29033
0.165747	0.293124
0.317917	0.316156
0.19773	0.301072
0.217585	0.267903
0.258136	0.327212
0.167124	0.173362
0.353011	0.320368
0.372214	0.340436
0.228702	0.210204
0.457145	0.258978
0.248805	0.333598
