# Supplementary material for: Reliability and Discriminative Validity of Wearable Sensors for the Quantification of Upper Limb Movement Disorders in Individuals with Dyskinetic Cerebral Palsy
Source: Sensors (Basel). 2023 Feb 1;23(3):1574. doi: 10.3390/s23031574 (PMC9921560; doi:10.3390/s23031574)
Supplement: Supplementary file 1 [file sensors-23-01574-s001.zip › sensor_parameters_TRT_short_wrist_RF.xls]

## Sheet: MaxJerk
76.0938	60.3746
47.3529	57.1133
53.2409	61.7301
55.1955	33.7432
38.0393	29.1573
47.7136	82.0775
73.8139	79.9988
55.8131	47.5548
62.6905	77.8899
39.0998	42.4961
76.6463	92.3567
38.2621	34.3234
131.756	88.2475
76.8643	83.2595
37.7908	39.9199
147.995	93.5322
88.9012	91.9998

## Sheet: MaxAnfJerk
56544.4	123901
188866	188562
411244	219539
95938.7	40536.9
115405	115902
50491.8	98530.3
251035	142089
121394	74713.3
37563	111663
77553.4	104708
360293	225317
55496.5	34291
312748	166997
271709	185252
166405	73541.9
300535	145869
50813.7	64657.5

## Sheet: MeanAcc
2.35417	2.69613
2.83047	3.11454
2.99062	3.34917
3.91848	2.63304
2.10488	2.71381
2.49889	3.86037
3.51432	4.5466
2.04761	2.60791
2.03222	2.99647
1.84064	2.23537
3.38802	4.10612
1.83068	1.64613
6.82731	5.14556
3.31457	4.14265
1.52894	1.9751
6.05735	3.88183
4.71413	4.12807

## Sheet: MaxAcc
5.78003	5.25713
6.6895	9.22505
7.88869	9.92569
9.44993	5.77311
10.5241	10.7798
5.52403	8.61846
8.19009	8.27864
4.91277	4.938
5.23745	7.82038
5.39019	5.41513
13.001	12.1405
3.75407	3.81092
12.7342	11.0271
7.47504	8.63248
4.16704	4.06795
12.4126	8.28533
8.82471	8.12458

## Sheet: MeanGyr
106.662	110.348
95.9429	101.25
88.5822	90.5432
89.8774	64.7033
60.0692	62.6223
84.5216	81.6351
92.0824	127.193
73.9731	88.2734
52.6949	70.0962
54.1315	73.0008
98.1167	118.561
56.3493	52.9332
202.975	173.954
111.709	122.774
63.4912	75.8589
188.657	133.164
134.355	136.527

## Sheet: MaxGyr
269.033	254.397
202.23	225.84
188.638	175.279
177.119	144.279
103.479	107.535
214.944	184.903
247.967	248.456
165.223	157.93
89.4184	143.323
126.267	160.107
158.14	207.281
131.38	130.196
371.313	295.296
222.613	241.969
168.553	156.338
408.83	248.625
256.109	243.335

## Sheet: RMSAcc
2.63948	2.93278
3.12708	3.43288
3.32557	3.72147
4.25311	2.88231
2.66772	3.32284
2.80671	4.28927
4.09477	4.9246
2.26612	2.8283
2.33216	3.33824
2.20832	2.54833
4.26123	4.83928
1.98751	1.80878
7.19813	5.54699
3.70783	4.55518
1.76083	2.15017
6.61667	4.28004
5.1287	4.44823

## Sheet: RMSGyr
124.348	128.809
108.849	114.165
99.1154	99.3543
100.636	75.6999
65.9007	69.197
105.731	97.9044
112.382	142.825
83.1075	95.2831
57.0169	76.1504
62.4599	82.3317
106.308	129.8
67.7909	64.2783
218.618	186.261
124.849	136.784
75.0801	83.653
210.503	146.731
149.543	149.556

## Sheet: SE_Acc
0.353072	0.423379
0.338279	0.361161
0.268883	0.325551
0.395564	0.344623
0.221899	0.197926
0.399597	0.387005
0.360056	0.350789
0.465109	0.459127
0.222704	0.246921
0.305314	0.275608
0.179051	0.312817
0.385995	0.396932
0.358346	0.352983
0.331866	0.409401
0.358009	0.354032
0.403594	0.433323
0.282758	0.294943

## Sheet: SE_Gyr
0.306454	0.306517
0.419661	0.320235
0.353011	0.404191
0.376949	0.320956
0.370991	0.30405
0.181552	0.3113
0.322018	0.334785
0.403399	0.40468
0.266951	0.356784
0.307677	0.325196
0.238668	0.340197
0.238988	0.211899
0.465259	0.441921
0.339974	0.406573
0.273337	0.337361
0.390837	0.361318
0.273783	0.280713
