# Supplementary material for: Reliability and Discriminative Validity of Wearable Sensors for the Quantification of Upper Limb Movement Disorders in Individuals with Dyskinetic Cerebral Palsy
Source: Sensors (Basel). 2023 Feb 1;23(3):1574. doi: 10.3390/s23031574 (PMC9921560; doi:10.3390/s23031574)
Supplement: Supplementary file 1 [file sensors-23-01574-s001.zip › sensor_parameters_TRT_short_wrist_RGV.xls]

## Sheet: MaxJerk
52.2291	40.982
41.2491	64.0018
49.4316	54.7388
44.525	52.1185
35.8398	49.1253
33.4185	50.4726
55.0844	77.1154
52.0805	72.9097
43.812	47.734
43.9208	92.1864
42.5983	35.2568
86.2404	76.8449
62.0503	69.4376
26.7887	42.7211
87.5352	37.1492
58.6991	79.8584

## Sheet: MaxAnfJerk
73878.9	134938
157583	231964
257779	203061
89817.3	81298.3
63764.1	74085.2
33545.5	62522.3
95204.6	189262
141459	150250
123675	83827
111014	206729
52261.1	46477.7
264036	291484
104660	148847
110063	119872
269125	73828.4
66411.4	56240.8

## Sheet: MeanAcc
2.36961	2.26819
2.4141	3.12065
2.92994	2.72102
2.90019	2.82387
1.91662	2.92835
1.97773	2.64938
2.61409	3.70599
1.98474	2.91155
1.86682	2.96396
2.73617	4.29033
1.5372	1.72126
3.90177	3.28097
2.71924	3.20408
1.43513	2.12535
3.44076	1.803
3.73284	4.1833

## Sheet: MaxAcc
5.05708	4.62483
6.15086	10.2035
6.50982	6.88432
8.92301	13.9846
6.77203	7.37118
4.48505	6.15407
5.6524	7.7877
5.25823	6.11098
5.15019	7.40213
8.26753	13.6923
4.42196	4.24821
8.41333	7.42061
6.32688	6.61132
3.39547	5.00799
7.6181	3.42343
8.26175	8.88514

## Sheet: MeanGyr
101.433	86.3012
74.3904	85.4337
82.9577	84.4335
66.5957	60.9177
52.606	70.3969
56.2579	69.8164
78.3075	111.111
66.9949	81.7032
53.2249	76.6394
88.1949	120.12
52.35	55.6865
129.907	142.595
88.8763	95.8556
65.9421	89.8274
112.707	52.6415
98.7837	109.102

## Sheet: MaxGyr
232.416	235.343
186.286	215.415
199.077	174.455
125.649	134.579
112.945	139.3
163.737	206.246
209.182	248.547
185.067	189.289
151.167	149.542
178.802	212.599
159.916	144.505
304.239	312.445
200.588	217.728
203.798	197.421
309.242	104.351
238.503	254.495

## Sheet: RMSAcc
2.58565	2.46112
2.74543	3.62835
3.18778	2.97465
3.30785	3.49509
2.20669	3.26407
2.20682	3.05348
2.98595	4.14183
2.3621	3.21468
2.1126	3.23458
3.13369	5.17605
1.77528	1.88792
4.27496	3.67203
3.05026	3.54061
1.61677	2.39183
3.90985	1.95933
4.45916	4.84204

## Sheet: RMSGyr
115.712	104.467
88.2894	101.081
97.1636	94.6901
74.0209	68.6513
61.3527	80.7708
73.4237	92.1309
96.7607	128.268
81.4431	94.7676
62.8122	84.515
100.776	134.045
69.2208	68.068
147.872	158.844
103.987	112.678
83.8088	105.15
133.245	58.5229
119.878	129.37

## Sheet: SE_Acc
0.372016	0.449581
0.349709	0.350831
0.393136	0.357416
0.402902	0.298233
0.309922	0.377156
0.364573	0.326597
0.342824	0.373852
0.379928	0.469447
0.422282	0.451735
0.393261	0.33583
0.308267	0.404067
0.4059	0.422459
0.346617	0.438506
0.358712	0.389829
0.349478	0.214472
0.251898	0.296916

## Sheet: SE_Gyr
0.352393	0.28295
0.414966	0.384367
0.33973	0.348814
0.369128	0.283234
0.349644	0.323599
0.177359	0.164856
0.320227	0.298068
0.296173	0.332968
0.322396	0.391803
0.289615	0.273667
0.141784	0.259666
0.311106	0.432702
0.319536	0.37604
0.246052	0.343365
0.362387	0.276855
0.224114	0.213621
