# Supplementary material for: Reliability and Discriminative Validity of Wearable Sensors for the Quantification of Upper Limb Movement Disorders in Individuals with Dyskinetic Cerebral Palsy
Source: Sensors (Basel). 2023 Feb 1;23(3):1574. doi: 10.3390/s23031574 (PMC9921560; doi:10.3390/s23031574)
Supplement: Supplementary file 1 [file sensors-23-01574-s001.zip › sensor_parameters_TRT_short_wrist_RS.xls]

## Sheet: MaxJerk
39.832	42.5256
51.3415	64.2303
78.138	78.575
50.8795	54.9527
38.4622	38.1863
85.9184	128.854
59.1265	90.8998
72.1727	72.7363
54.5945	64.8651
36.4817	39.8764
61.3042	93.9375
39.7028	43.8043
141.14	84.8055
72.2087	57.7128
49.9563	54.6814
141.223	53.9424
82.9697	134.246

## Sheet: MaxAnfJerk
80982.5	88945.1
152743	130110
213275	267211
128619	61615.9
61677.1	84533.1
77482.8	147085
55600.8	99270.2
185316	148990
28878.9	169602
85617.1	96255.3
142637	200331
36606.2	40896.7
385816	224188
173512	135837
114168	236492
325261	116904
64127.8	91402.6

## Sheet: MeanAcc
2.19052	2.29565
2.71515	3.34101
3.46636	3.48853
3.65812	3.19107
3.12287	4.39552
5.18925	7.60104
2.22297	4.66866
3.12469	3.48459
2.25944	3.98055
1.42252	2.26204
3.08337	4.95388
1.79653	1.89935
6.78036	4.45823
3.29961	4.0956
2.08729	2.76043
5.71575	3.10257
3.84653	4.9351

## Sheet: MaxAcc
4.38792	4.49547
7.15254	8.84128
9.4458	11.313
8.79888	6.33151
8.99343	13.5276
9.59391	14.2646
8.35545	9.15097
6.75021	6.79613
5.24874	12.3081
4.12137	4.99951
10.5806	17.1617
4.72345	5.04821
12.766	8.88982
7.44265	8.06192
4.95497	5.80673
14.6824	5.74924
8.78577	11.721

## Sheet: MeanGyr
96.3855	99.0043
124.557	133.581
126.932	130.02
120.95	111.779
116.443	139.315
134.736	198.448
70.1298	152.107
119.221	143.327
88.3097	129.568
60.6958	96.2863
145.999	180.258
62.1331	75.3224
260.627	181.91
131.866	160.26
104.553	147.242
201.32	121.238
138.903	161.686

## Sheet: MaxGyr
204.248	212.898
231.787	241.737
203.127	210.677
215.578	188.687
171.746	216.849
263.596	332.575
231.662	371.951
277.747	274.19
188.26	245.346
159.759	191.584
236.511	269.636
136.707	161.067
454.326	356.867
255.015	329.476
246.306	307.333
396.128	220.633
273.884	286.185

## Sheet: RMSAcc
2.38707	2.49596
3.02087	3.61998
3.83005	3.96916
3.89923	3.35968
3.43418	4.93139
5.67123	8.05488
3.02979	5.0837
3.45523	3.77593
2.50553	4.41228
1.65527	2.52634
3.66577	6.07595
2.09061	2.18024
7.23158	4.77492
3.64162	4.47451
2.31945	3.07175
6.63464	3.3848
4.31436	5.39766

## Sheet: RMSGyr
110.837	112.808
137.899	146.061
135.985	139.751
134.463	121.39
123.982	152.837
157.074	214.912
89.7778	179.287
137.877	158.671
100.621	142.702
70.1267	105.503
158.563	192.106
72.5236	87.8079
284.001	202.895
153.07	185.214
121.596	167.065
222.896	135.716
154.201	175.756

## Sheet: SE_Acc
0.381277	0.419758
0.339517	0.304987
0.324552	0.290411
0.342605	0.268235
0.164201	0.306334
0.398239	0.366417
0.163636	0.401736
0.438352	0.449606
0.30988	0.230317
0.28874	0.345951
0.278805	0.260079
0.364805	0.353188
0.449898	0.527677
0.38023	0.389339
0.435805	0.338357
0.360501	0.332623
0.251411	0.345111

## Sheet: SE_Gyr
0.258154	0.318773
0.344474	0.304888
0.331854	0.32625
0.215521	0.222767
0.197235	0.197395
0.211327	0.365323
0.161712	0.238052
0.298057	0.363109
0.225118	0.284792
0.266534	0.314606
0.24159	0.257759
0.212347	0.175874
0.383222	0.376918
0.178965	0.254177
0.324682	0.317969
0.454596	0.265981
0.230579	0.290751
