# Supplementary figures and images for: Reliability and Discriminative Validity of Wearable Sensors for the Quantification of Upper Limb Movement Disorders in Individuals with Dyskinetic Cerebral Palsy
Source: MDPI journal article supplement (doi:10.3390/s23031574), 2023-02-01

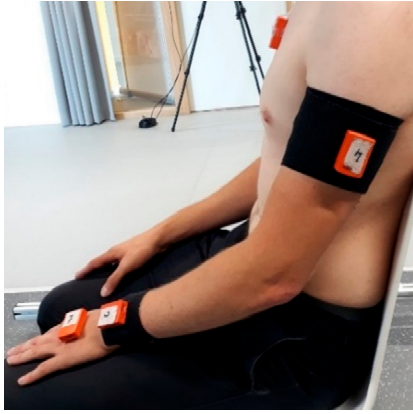

Figure S1. Sensor placements

Supplement: s1 [file s1]

### Reach forwards

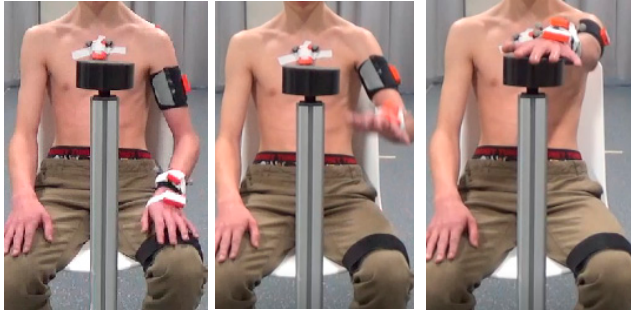

### Reach and grasp vertical

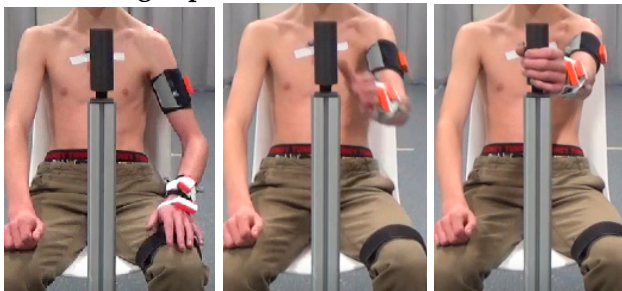

### Reach sideways

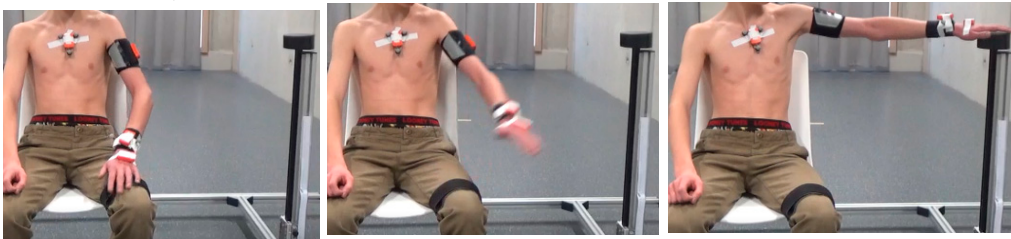

Figure S2. Task illustration

Supplement: s1 [file s1]
